# Supplementary material
Source: PubMed Central journal article supplement (PMC4382011)
Supplement: NIHMS661033-supplement-Supplemental_Materials.pdf [file NIHMS661033-supplement-Supplemental_Materials.pdf]

Supplementary Materials for  
**Room-Temperature Enantioselective C–H Iodination via Kinetic Resolution**

Ling Chu, Kai-Jiong Xiao, Jin-Quan Yu†

The Scripps Research Institute, 10550 N. Torrey Pines Road, La Jolla, California 92037, USA.

†Corresponding author. Email: [yu200@scripps.edu](mailto:yu200@scripps.edu)

## Table of Contents

|                                                                           |      |
|---------------------------------------------------------------------------|------|
| <b>General Information</b> .....                                          | S2   |
| <b>Substrates</b> .....                                                   | S3   |
| <b>Experimental Procedures and Characterization of Compounds</b> .....    | S4   |
| Procedures for the Preparation of Substrates.....                         | S4   |
| Optimization of Reaction Conditions.....                                  | S12  |
| General Procedure for Pd(OAc) <sub>2</sub> -Catalyzed C–H Iodination..... | S13  |
| Deprotection of Trifluoromethanesulfonamide <b>3l</b> .....               | S27  |
| Synthetic Transformations of the Iodinated Product.....                   | S27  |
| <b>NMR Spectra</b> .....                                                  | S31  |
| <b>HPLC Spectra</b> .....                                                 | S89  |
| <b>X-ray Crystallographic Data of 3l</b> .....                            | S141 |
| <b>References</b> .....                                                   | S143 |

**General Information:**

Unless otherwise noted all commercial materials were used without further purification. Solvents were obtained from Acros or Sigma-Aldrich and used directly without further purification. Nuclear magnetic resonance (NMR) spectra were recorded with Varian Inova-400, Bruker DRX-600.  $^1\text{H}$  and  $^{13}\text{C}$  chemical shifts are reported in ppm downfield of tetramethylsilane and referenced to residual solvent peak ( $\text{CHCl}_3 = 7.26$ ) unless otherwise noted. Multiplicities are reported using the following abbreviations: s = singlet, d = doublet, t = triplet, q = quartet, m = multiplet, br = broad resonance. High resolution mass spectra for new compounds were recorded on an Agilent LC/MSD TOF mass spectrometer or an Agilent 6230 APCI-TOF mass spectrometer. Enantiomeric excesses (ee) were determined on a Hitachi LaChrow Elite HPLC system using commercially available chiral columns. All amino acids were purchased from Bachem or Sigma-Aldrich or synthesized according to literature procedures. All the substrates were synthesized according to the literature procedures (31).

**Substrates:**

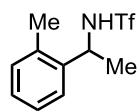

**1a**

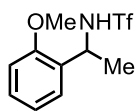

**1g**

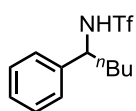

**1m**

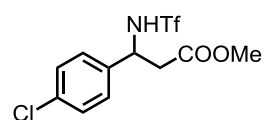

**4f**

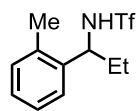

**1b**

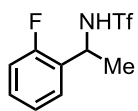

**1h**

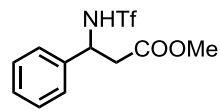

**4a**

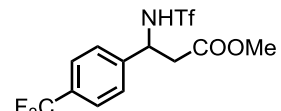

**4g**

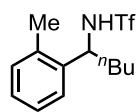

**1c**

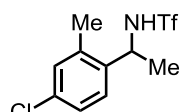

**1i**

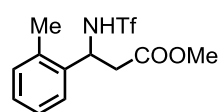

**4b**

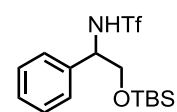

**7a**

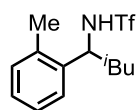

**1d**

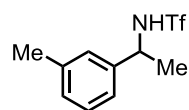

**1j**

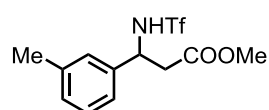

**4c**

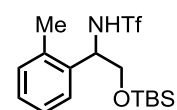

**7b**

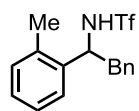

**1e**

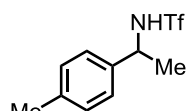

**1k**

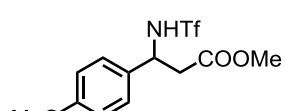

**4d**

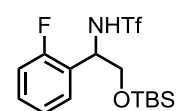

**7c**

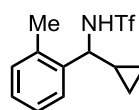

**1f**

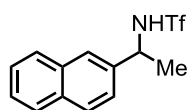

**1l**

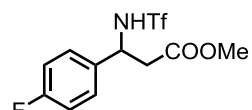

**4e**

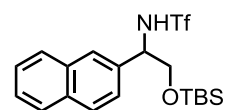

**7d**

## Experimental Procedures and Characterization of Compounds:

### Procedures for the Preparation of Substrates

#### General procedure for preparation of substrates **1b, 1h, 1k**:

To a stirred solution of the corresponding amine (5 mmol, 1.0 equiv.) in dichloromethane (20 mL) was added triethylamine (5 mmol, 1.0 equiv.) at -78 °C under nitrogen. After stirring for 10 min at -78 °C, trifluoromethanesulfonic anhydride (5.3 mmol, 1.05 equiv.) was added dropwise and the mixture was stirred for 1 h at that temperature before being quenched by water (20 mL). The organic layer was separated and the aqueous layer was extracted with dichloromethane (10 mL × 2). The combined organic phase was washed with brine (20 mL), and then dried over MgSO<sub>4</sub>. Evaporation and column chromatography on silica gel (EtOAc/hexane = 1:20 as eluent) afforded corresponding trifluoromethanesulfonamide **1b, 1h, 1k**.

#### General procedure for preparation of substrates **1a, 1c, 1d, 1e, 1f, 1g, 1i,1j, 1l** (31)

To a 100 mL round bottle was added the corresponding ketone, Ti(O<sup>*i*</sup>Pr)<sub>4</sub> (2 equiv.) and a 2 M solution of NH<sub>3</sub> in EtOH (5 equiv.) under nitrogen. The resulting solution was heated to 50 °C and stirred for 24 h. Then the mixture was cooled to room temperature and NaBH<sub>4</sub> was added and the reaction mixture was stirred at room temperature for 6 h. The reaction was quenched with NH<sub>4</sub>Cl solution and filtered through a pad of Celite. The resulting liquid was then extracted with EtOAc and the aqueous layer was washed twice with EtOAc. The organic layers were combined and extracted with 1 M HCl. The aqueous layer from this extraction was washed once with Et<sub>2</sub>O, and then treated with 2 M NaOH until a pH of 12 was attained, and was then extracted thrice with EtOAc. The combined organic layer was washed with sat. aq. NaCl and concentrated under reduced pressure to give the crude amine, which could be used directly into the next step without purification. And the corresponding trifluoromethanesulfonamides **1a, 1c, 1d, 1e, 1f, 1g, 1i, 1j, 1l** could be synthesized using the same protocol shown above.

#### General procedure for preparation of substrates **4a-4g**:

To a 100 mL round bottle was added the corresponding β-amino acid and methanol. The mixture was cooled to 0 °C and SOCl<sub>2</sub> (1.5 equiv.) was added dropwise. The solution was then stirred at room temperature for 12 h. After completion, the solution was concentrated under reduced pressure to give the crude ester. The corresponding trifluoromethanesulfonamides **4a-4g** could be synthesized using the same protocol shown above.

### General procedure for preparation of substrates 7a-7d:

The amino alcohol was converted to the corresponding triflate amide according to the protocol shown above. The alcohol was protected as the TBS ether according to the protocol shown below.

To a 100 mL round bottle was added the corresponding alcohol, TBS-Cl (1.1 equiv.), DMAP (0.1 equiv.) and DCM. The mixture was cooled to 0 °C and Et<sub>3</sub>N (1.1 equiv.) was added dropwise. The solution was warmed to room temperature and stirred for 12 h. Then the reaction was quenched with water. The organic layer was separated and the aqueous layer was washed twice with DCM. The combined organic layer was washed with sat. aq. NaCl and concentrated under reduced pressure to give the crude product, which was purified by column chromatography on silica gel (ethyl acetate/hexane= 1:30 as eluent) to afford **7a-7d**.

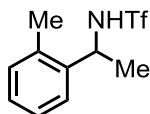

#### **1a 1,1,1-Trifluoro-N-(1-(*o*-tolyl)ethyl)methanesulfonamide**

<sup>1</sup>H NMR (600 MHz, CDCl<sub>3</sub>) δ 7.32 – 7.13 (m, 4H), 5.65 (br s, 1H), 5.03 (q, *J* = 6.8 Hz, 1H), 2.37 (s, 3H), 1.55 (d, *J* = 6.8 Hz, 3H).

<sup>13</sup>C NMR (151 MHz, CDCl<sub>3</sub>) δ 139.63, 134.28, 130.86, 127.98, 126.77, 124.57, 119.41 (q, *J* = 321.1 Hz) 51.56, 23.42, 18.88.

HRMS (ESI-TOF) *m/z*. Calcd for C<sub>10</sub>H<sub>11</sub>F<sub>3</sub>NO<sub>2</sub>S<sup>-</sup> [M-H]<sup>-</sup> 266.0468, found 266.0469.

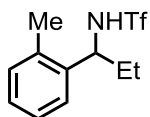

#### **1b 1,1,1-trifluoro-N-(1-(*o*-tolyl)propyl)methanesulfonamide**

<sup>1</sup>H NMR (600 MHz, CDCl<sub>3</sub>) δ 7.27 – 7.13 (m, 4H), 5.73 (s, 1H), 4.78 (m, 1H), 2.36 (s, 3H), 1.95 – 1.77 (m, 2H), 0.93 (t, *J* = 7.4 Hz, 3H).

<sup>13</sup>C NMR (151 MHz, CDCl<sub>3</sub>) δ 138.79, 134.65, 130.71, 127.76, 126.69, 124.78, 119.38 (q, *J* = 321.04 Hz), 57.14, 30.75, 19.04, 10.39.

HRMS (ESI-TOF) *m/z*. Calcd for C<sub>11</sub>H<sub>13</sub>F<sub>3</sub>NO<sub>2</sub>S<sup>-</sup> [M-H]<sup>-</sup> 280.0625, found 280.0622.

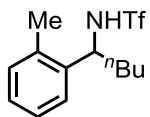

#### **1c 1,1,1-trifluoro-N-(1-(*o*-tolyl)pentyl)methanesulfonamide**

<sup>1</sup>H NMR (600 MHz, CDCl<sub>3</sub>) δ 7.73 – 6.88 (m, 4H), 4.84 (t, *J* = 7.3 Hz, 1H), 2.36 (s, 3H), 1.90 – 1.72 (m, 2H), 1.47

– 1.18 (m, 4H), 0.88 (t,  $J = 7.2$  Hz, 3H).

$^{13}\text{C}$  NMR (151 MHz,  $\text{CDCl}_3$ )  $\delta$  139.16, 134.48, 130.70, 127.71, 126.70, 124.79, 119.36 (q,  $J = 321.0$  Hz), 55.72, 37.46, 27.93, 22.17, 19.02, 13.75.

HRMS (ESI-TOF)  $m/z$  Calcd for  $\text{C}_{13}\text{H}_{18}\text{F}_3\text{NO}_2\text{SNa}^+ [\text{MNa}]^+$  332.0902, found 332.0899.

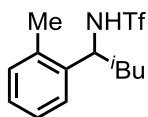

**1d 1,1,1-trifluoro-*N*-(3-methyl-1-(*o*-tolyl)butyl)methanesulfonamide**

$^1\text{H}$  NMR (600 MHz,  $\text{CDCl}_3$ )  $\delta$  7.27 – 7.13 (m, 4H), 5.46 (d,  $J = 7.6$  Hz, 1H), 4.98 – 4.90 (m, 1H), 2.37 (s, 3H), 1.75 – 1.63 (m, 2H), 1.60 – 1.50 (m, 1H), 0.98 (d,  $J = 6.4$  Hz, 3H), 0.94 (d,  $J = 6.5$  Hz, 3H).

$^{13}\text{C}$  NMR (151 MHz,  $\text{CDCl}_3$ )  $\delta$  139.31, 134.28, 130.83, 127.76, 126.73, 124.71, 119.30 (q,  $J = 320.9$  Hz), 54.06, 47.04, 24.78, 22.80, 21.72, 18.94.

HRMS (ESI-TOF)  $m/z$  Calcd for  $\text{C}_{13}\text{H}_{18}\text{F}_3\text{NO}_2\text{SNa}^+ [\text{MNa}]^+$  322.0902, found 322.0899.

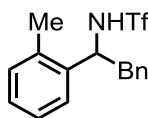

**1e 1,1,1-trifluoro-*N*-(2-phenyl-1-(*o*-tolyl)ethyl)methanesulfonamide**

$^1\text{H}$  NMR (600 MHz,  $\text{CDCl}_3$ )  $\delta$  7.28 – 7.17 (m, 5H), 7.13 (d,  $J = 7.6$  Hz, 1H), 7.10 (d,  $J = 7.4$  Hz, 1H), 7.01 – 6.94 (m, 2H), 5.36 (s, 1H), 5.11 (m, 1H), 3.16 – 3.07 (m, 2H), 2.16 (s, 3H).

$^{13}\text{C}$  NMR (151 MHz,  $\text{CDCl}_3$ )  $\delta$  137.96, 135.28, 134.77, 130.69, 129.49, 128.58, 127.99, 127.25, 126.55, 125.17, 119.28 (q,  $J = 321.2$  Hz), 56.53, 43.94, 18.87.

HRMS (ESI-TOF)  $m/z$  Calcd for  $\text{C}_{16}\text{H}_{16}\text{F}_3\text{NO}_2\text{SNa}^+ [\text{MNa}]^+$  366.0746, found 366.0745.

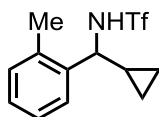

**1f *N*-(cyclopropyl(*o*-tolyl)methyl)-1,1,1-trifluoromethanesulfonamide**

$^1\text{H}$  NMR (600 MHz,  $\text{CDCl}_3$ )  $\delta$  7.29 – 7.18 (m, 3H), 7.19 – 7.14 (m, 1H), 5.56 (s, 1H), 4.52 (dd,  $J = 7.9$  Hz, 7.9 Hz, 1H), 2.35 (s, 3H), 1.41 – 1.30 (m, 1H), 0.73 – 0.64 (m, 1H), 0.58 – 0.50 (m, 1H), 0.37 – 0.26 (m, 2H).

$^{13}\text{C}$  NMR (151 MHz,  $\text{CDCl}_3$ )  $\delta$  137.26, 134.89, 130.69, 127.96, 126.41, 125.95, 119.41 (q,  $J = 321.0$  Hz), 59.19, 19.25, 17.20, 4.48, 2.70.

HRMS (ESI-TOF)  $m/z$  Calcd for  $\text{C}_{12}\text{H}_{14}\text{F}_3\text{NO}_2\text{SNa}^+ [\text{MNa}]^+$  316.0589, found 316.0587.

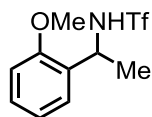

**1g 1,1,1-trifluoro-*N*-(1-(2-methoxyphenyl)ethyl)methanesulfonamide**

$^1\text{H NMR}$  (600 MHz,  $\text{CDCl}_3$ )  $\delta$  7.30 (t,  $J = 7.6$  Hz, 1H), 7.13 (d,  $J = 7.6$  Hz, 1H), 6.94 (m, 2H), 6.13 (d,  $J = 8.8$  Hz, 1H), 4.74 (m, 1H), 3.90 (s, 3H), 1.61 (d,  $J = 7.0$  Hz, 3H).

$^{13}\text{C NMR}$  (151 MHz,  $\text{CDCl}_3$ )  $\delta$  156.56, 129.41, 128.70, 128.08, 119.47 (q,  $J = 321.1$  Hz), 116.28, 111.28, 55.40, 55.14, 22.95.

HRMS (ESI-TOF)  $m/z$  Calcd for  $\text{C}_{10}\text{H}_{12}\text{F}_3\text{NO}_3\text{SNa}^+$   $[\text{MNa}]^+$  306.0382, found 306.0384.

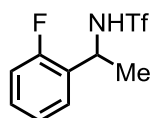

**1h 1,1,1-trifluoro-*N*-(1-(2-fluorophenyl)ethyl)methanesulfonamide**

$^1\text{H NMR}$  (600 MHz,  $\text{CDCl}_3$ )  $\delta$  7.35 – 7.28 (m, 1H), 7.26 (dd,  $J = 7.1$ , 6.9 Hz, 1H), 7.14 (d,  $J = 7.1$ , 7.1 Hz, 1H), 7.12 – 7.00 (m, 1H), 5.78 (br s, 1H), 4.92 (q,  $J = 7.1$  Hz, 1H), 1.63 (d,  $J = 7.1$  Hz, 3H).

$^{13}\text{C NMR}$  (151 MHz,  $\text{CDCl}_3$ )  $\delta$  160.09 (d,  $J = 246.1$  Hz), 129.97 (d,  $J = 8.5$  Hz), 128.37 (d,  $J = 12.8$  Hz), 127.68 (d,  $J = 4.1$  Hz), 124.66 (d,  $J = 3.1$  Hz), 119.39 (q,  $J = 320.8$  Hz), 116.09 (d,  $J = 21.5$  Hz), 51.83 (d,  $J = 1.8$  Hz), 23.04 (d,  $J = 2.0$  Hz).

HRMS (ESI-TOF)  $m/z$  Calcd for  $\text{C}_9\text{H}_8\text{F}_4\text{NO}_2\text{SNa}^+$   $[\text{MNa}]^+$  293.0104, found 293.0104.

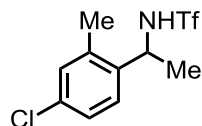

**1i *N*-(1-(4-chloro-2-methylphenyl)ethyl)-1,1,1-trifluoromethanesulfonamide**

$^1\text{H NMR}$  (600 MHz,  $\text{CDCl}_3$ )  $\delta$  7.20 (s, 2H), 7.17 (s, 1H), 5.75 (s, 1H), 5.02 – 4.95 (m, 1H), 2.35 (s, 3H), 1.53 (d,  $J = 6.9$  Hz, 3H).

$^{13}\text{C NMR}$  (151 MHz,  $\text{CDCl}_3$ )  $\delta$  138.31, 136.22, 133.47, 130.64, 126.85, 126.11, 119.35 (q,  $J = 321.1$  Hz), 51.11, 23.32, 18.73.

HRMS (ESI-TOF)  $m/z$  Calcd for  $\text{C}_{10}\text{H}_{10}\text{ClF}_3\text{NO}_2\text{S}^-$   $[\text{M-H}]^-$  300.0078, found 300.0080.

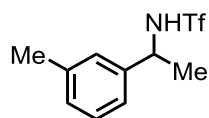

**1j 1,1,1-trifluoro-*N*-(1-(*m*-tolyl)ethyl)methanesulfonamide**

$^1\text{H NMR}$  (600 MHz,  $\text{CDCl}_3$ )  $\delta$  7.27 (dd,  $J = 7.5$ , 7.5 Hz, 1H), 7.18 – 7.07 (m, 3H), 5.63 – 5.37 (br s, 1H), 4.80 – 4.71 (m, 1H), 2.37 (s, 3H), 1.61 (d,  $J = 6.9$  Hz, 3H).



$^{13}\text{C}$  NMR (151 MHz,  $\text{CDCl}_3$ )  $\delta$  140.91, 138.76, 129.03, 128.88, 126.54, 122.81, 119.49 (q,  $J = 321.0$  Hz), 55.32, 23.47, 21.37.

HRMS (ESI-TOF)  $m/z$  Calcd for  $\text{C}_{10}\text{H}_{12}\text{F}_3\text{NO}_2\text{SNa}^+ [\text{MNa}]^+$  290.0433, found 290.0431.

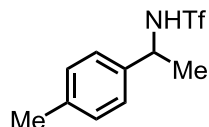

**1k 1,1,1-trifluoro-N-(1-(*p*-tolyl)ethyl)methanesulfonamide**

$^1\text{H}$  NMR (600 MHz,  $\text{CDCl}_3$ )  $\delta$  7.22 – 7.13 (m, 4H), 5.35 (s, 1H), 4.74 (m, 1H), 2.34 (s, 3H), 1.59 (d,  $J = 7.0$  Hz, 3H).

$^{13}\text{C}$  NMR (151 MHz,  $\text{CDCl}_3$ )  $\delta$  138.13, 137.99, 129.62, 125.75, 119.49 (q,  $J = 320.8$  Hz), 55.14, 23.42, 21.01.

HRMS (ESI-TOF)  $m/z$  Calcd for  $\text{C}_{10}\text{H}_{12}\text{F}_3\text{NO}_2\text{SNa}^+ [\text{MNa}]^+$  290.0433, found 290.0435.

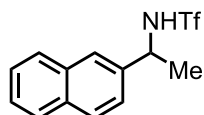

**1l 1,1,1-trifluoro-N-(1-(naphthalen-2-yl)ethyl)ethanesulfonamide**

$^1\text{H}$  NMR (600 MHz,  $\text{CDCl}_3$ )  $\delta$  7.87 – 7.78 (m, 3H), 7.73 (s, 1H), 7.54 – 7.46 (m, 2H), 7.38 (d,  $J = 8.5$  Hz, 1H), 5.43 (d,  $J = 7.5$  Hz, 1H), 4.99 – 4.89 (m, 1H), 1.68 (d,  $J = 6.9$  Hz, 3H).

$^{13}\text{C}$  NMR (151 MHz,  $\text{CDCl}_3$ )  $\delta$  138.18, 133.14, 132.97, 129.05, 128.01, 127.68, 126.62, 126.49, 124.74, 123.61, 119.50 (q,  $J = 321.0$  Hz), 55.42, 23.37.

HRMS (ESI-TOF)  $m/z$  Calcd for  $\text{C}_{13}\text{H}_{12}\text{F}_3\text{NO}_2\text{SNa}^+ [\text{MNa}]^+$  326.0433, found 326.0434.

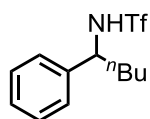

**1m 1,1,1-trifluoro-N-(1-phenylpentyl)ethanesulfonamide**

$^1\text{H}$  NMR (600 MHz,  $\text{CDCl}_3$ )  $\delta$  7.41 – 7.35 (m, 2H), 7.35 – 7.30 (m, 1H), 7.27 – 7.20 (m, 2H), 5.30 (br s, 1H), 4.55 (ddd,  $J = 7.7, 7.7, 7.7$  Hz, 1H), 2.00 – 1.81 (m, 2H), 1.39 – 1.27 (m, 3H), 1.27 – 1.15 (m, 1H), 0.87 (t,  $J = 7.2$  Hz, 3H).

$^{13}\text{C}$  NMR (151 MHz,  $\text{CDCl}_3$ )  $\delta$  140.26, 128.97, 128.24, 126.09, 119.39 (q,  $J = 321.1$  Hz), 60.02, 37.46, 27.97, 22.12, 13.76.

HRMS (ESI-TOF)  $m/z$  Calcd for  $\text{C}_{12}\text{H}_{15}\text{F}_3\text{NO}_2\text{S}^- [\text{M-H}]^-$  294.0781, found 294.0783.

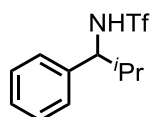

**1n 1,1,1-trifluoro-N-(2-methyl-1-phenylpropyl)ethanesulfonamide**

$^1\text{H}$  NMR (600 MHz,  $\text{CDCl}_3$ )  $\delta$  7.42 – 7.27 (m, 3H), 7.18 (d,  $J = 7.7$  Hz, 2H), 5.54 (br,  $J = 37.2$  Hz, 1H), 4.30 (d,  $J = 7.6$  Hz, 1H), 2.10 – 1.96 (m, 1H), 1.02 (d,  $J = 6.7$  Hz, 3H), 0.86 (d,  $J = 6.7$  Hz, 3H).

$^{13}\text{C}$  NMR (151 MHz,  $\text{CDCl}_3$ )  $\delta$  139.55, 128.68, 127.97, 126.38, 119.33 (q,  $J = 320.9$  Hz), 77.21, 77.00, 76.79, 65.76, 34.63, 19.45, 18.49.

HRMS (ESI-TOF)  $m/z$  Calcd for  $\text{C}_{11}\text{H}_{13}\text{F}_3\text{NO}_2\text{S}^-$   $[\text{M}-\text{H}]^-$  280.0625, found 280.0626.

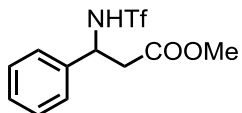

#### 4a methyl 3-phenyl-3-((trifluoromethyl)sulfonamido)propanoate

$^1\text{H}$  NMR (600 MHz,  $\text{CDCl}_3$ )  $\delta$  7.40 – 7.34 (m, 2H), 7.34 – 7.26 (m, 3H), 6.85 (s, 1H), 5.03 (m, 1H), 3.65 (s, 3H), 2.96 (d,  $J = 5.5$  Hz, 2H).

$^{13}\text{C}$  NMR (151 MHz,  $\text{CDCl}_3$ )  $\delta$  171.19, 138.70, 128.93, 128.38, 125.84, 119.36 (q,  $J = 320.9$  Hz), 55.52, 52.25, 41.22.

HRMS (ESI-TOF)  $m/z$  Calcd for  $\text{C}_{11}\text{H}_{12}\text{F}_3\text{NO}_4\text{SNa}^+$   $[\text{MNa}]^+$  334.0331, found 334.0326.

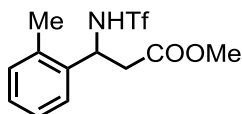

#### 4b methyl 3-(*o*-tolyl)-3-((trifluoromethyl)sulfonamido)propanoate

$^1\text{H}$  NMR (600 MHz,  $\text{CDCl}_3$ )  $\delta$  7.32 (d,  $J = 7.2$  Hz, 1H), 7.29 – 7.20 (m, 2H), 7.17 (d,  $J = 7.0$  Hz, 1H), 6.81 (s, 1H), 5.27 (dd,  $J = 6.7$  Hz, 5.7 Hz, 1H), 3.67 (s, 3H), 2.91 (dd,  $J = 15.8$ , 5.7 Hz, 1H), 2.84 (dd,  $J = 15.8$ , 6.7 Hz, 1H), 2.39 (s, 3H).

$^{13}\text{C}$  NMR (151 MHz,  $\text{CDCl}_3$ )  $\delta$  171.08, 137.23, 134.25, 130.91, 128.28, 126.73, 125.16, 119.32 (q,  $J = 320.8$  Hz), 52.28, 52.04, 40.74, 18.88.

HRMS (ESI-TOF)  $m/z$  Calcd for  $\text{C}_{12}\text{H}_{14}\text{F}_3\text{NO}_4\text{SNa}^+$   $[\text{MNa}]^+$  348.0488, found 348.0488.

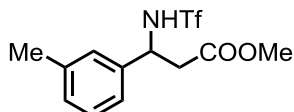

#### 4c methyl 3-(*m*-tolyl)-3-((trifluoromethyl)sulfonamido)propanoate

$^1\text{H}$  NMR (600 MHz,  $\text{CDCl}_3$ )  $\delta$  7.25 (t,  $J = 7.5$  Hz, 1H), 7.16 – 7.06 (m, 3H), 6.69 (br s, 1H), 4.98 (m, 1H), 3.66 (s, 3H), 3.01 – 2.91 (m, 2H), 2.35 (s, 3H).

$^{13}\text{C}$  NMR (151 MHz,  $\text{CDCl}_3$ )  $\delta$  171.21, 138.73, 129.15, 128.83, 126.57, 122.80, 119.41 (q,  $J = 320.7$  Hz), 55.45, 52.22, 41.11, 21.41.

HRMS (ESI-TOF)  $m/z$  Calcd for  $\text{C}_{12}\text{H}_{14}\text{F}_3\text{NO}_4\text{SNa}^+$   $[\text{MNa}]^+$  348.0488, found 348.0490.

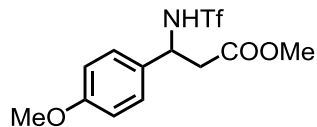

**4d methyl 3-(4-methoxyphenyl)-3-((trifluoromethyl)sulfonamido)propanoate**

$^1\text{H}$  NMR (600 MHz,  $\text{CDCl}_3$ )  $\delta$  7.23 (d,  $J = 7.6$  Hz, 2H), 6.88 (d,  $J = 7.6$  Hz, 2H), 6.67 (s, 1H), 4.98 (m, 1H), 3.79 (s, 3H), 3.66 (s, 3H), 2.95 (s, 2H).

$^{13}\text{C}$  NMR (151 MHz,  $\text{CDCl}_3$ )  $\delta$  171.20, 159.45, 130.74, 127.18, 119.39 (q,  $J = 320.8, 320.2$  Hz), 114.26, 55.23, 55.05, 52.22, 41.15.

HRMS (ESI-TOF)  $m/z$  Calcd for  $\text{C}_{12}\text{H}_{14}\text{F}_3\text{NO}_5\text{SNa}^+ [\text{MNa}]^+$  364.0437, found 364.0434.

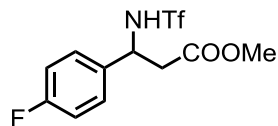

**4e methyl 3-(4-fluorophenyl)-3-((trifluoromethyl)sulfonamido)propanoate**

$^1\text{H}$  NMR (600 MHz,  $\text{CDCl}_3$ )  $\delta$  7.40 – 7.24 (m, 2H), 7.16 – 6.99 (m, 2H), 6.79 (s, 1H), 5.16 – 4.94 (m, 1H), 3.67 (s, 3H), 3.04 – 2.87 (m, 2H).

$^{13}\text{C}$  NMR (151 MHz,  $\text{CDCl}_3$ )  $\delta$  171.17, 162.46 (d,  $J = 247.8$  Hz), 134.58 (d,  $J = 3.3$  Hz), 127.74 (d,  $J = 8.4$  Hz), 119.41 (q,  $J = 320.8$  Hz), 115.93 (d,  $J = 21.8$  Hz), 54.79, 52.35, 40.97.

HRMS (ESI-TOF)  $m/z$  Calcd for  $\text{C}_{11}\text{H}_{11}\text{F}_4\text{NO}_4\text{SNa}^+ [\text{MNa}]^+$  352.0237, found 352.0237.

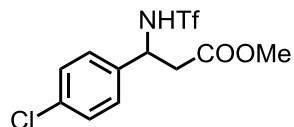

**4f methyl 3-(4-chlorophenyl)-3-((trifluoromethyl)sulfonamido)propanoate**

$^1\text{H}$  NMR (600 MHz,  $\text{CDCl}_3$ )  $\delta$  7.35 (d,  $J = 8.2$  Hz, 2H), 7.26 (d,  $J = 8.2$  Hz, 2H), 6.82 (br s, 1H), 4.99 (t,  $J = 4.8$  Hz, 1H), 3.67 (s, 3H), 3.02 – 2.86 (m, 2H).

$^{13}\text{C}$  NMR (151 MHz,  $\text{CDCl}_3$ )  $\delta$  171.12, 137.22, 134.34, 129.16, 127.31, 119.34 (q,  $J = 320.6$  Hz), 54.76, 52.38, 40.78.

HRMS (ESI-TOF)  $m/z$  Calcd for  $\text{C}_{11}\text{H}_{11}\text{ClF}_3\text{NO}_4\text{SNa}^+ [\text{MNa}]^+$  367.9942, found 367.9943.

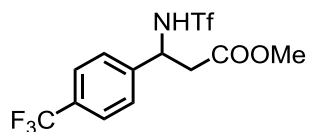

**4g methyl 3-(4-(trifluoromethyl)phenyl)-3-((trifluoromethyl)sulfonamide)propanoate**

$^1\text{H}$  NMR (600 MHz,  $\text{CDCl}_3$ )  $\delta$  7.65 (d,  $J = 8.4$  Hz, 2H), 7.46 (d,  $J = 8.4$  Hz, 2H), 6.83 (s, 1H), 5.06 (dd,  $J = 5.3, 4.8$  Hz, 1H), 3.67 (s, 3H), 3.05 (dd,  $J = 16.7, 5.3$  Hz, 1H), 2.97 (dd,  $J = 16.7, 4.8$  Hz, 1H).

$^{13}\text{C}$  NMR (151 MHz,  $\text{CDCl}_3$ )  $\delta$  171.12, 142.55, 130.69 (q,  $J = 32.8$  Hz), 126.35, 126.01 (q,  $J = 3.6$  Hz), 123.75 (q,

$J = 272.2$  Hz), 119.37 (q,  $J = 320.5$  Hz), 54.72, 52.46, 40.33.

HRMS (ESI-TOF)  $m/z$  Calcd for  $C_{12}H_{11}F_6NO_4SNa^+$   $[MNa]^+$  402.0205, found 402.0206.

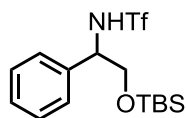

**7a** *N*-(2-((*tert*-butyldimethylsilyloxy)-1-phenylethyl)-1,1,1-trifluoromethanesulfonamide

$^1H$  NMR (600 MHz,  $CDCl_3$ )  $\delta$  7.40 – 7.35 (m, 2H), 7.35 – 7.29 (m, 3H), 5.96 (br s, 1H), 4.73 (m, 1H), 3.97 (dd,  $J = 10.4, 4.1$  Hz, 1H), 3.80 (dd,  $J = 10.4, 4.7$  Hz, 1H), 0.90 – 0.79 (m, 9H), -0.01 – -0.10 (m, 6H).

$^{13}C$  NMR (151 MHz,  $CDCl_3$ )  $\delta$  138.01, 128.56, 128.19, 126.56, 119.50 (q,  $J = 320.9$  Hz), 66.71, 60.12, 25.66, 18.20, -5.78, -5.87.

HRMS (ESI-TOF)  $m/z$  Calcd for  $C_{15}H_{25}F_3NO_3SSi^+$   $[MH]^+$  384.1271, found 384.1270.

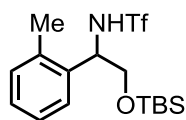

**7b** *N*-(2-((*tert*-butyldimethylsilyloxy)-1-(*o*-tolyl)ethyl)-1,1,1-trifluoromethanesulfonamide

$^1H$  NMR (600 MHz,  $CDCl_3$ )  $\delta$  7.32 – 7.24 (m, 1H), 7.24 – 7.18 (m, 2H), 7.18 – 7.13 (m, 1H), 5.80 (s, 1H), 5.02 – 4.90 (m, 1H), 3.88 (dd,  $J = 10.5, 4.4$  Hz, 1H), 3.67 (dd,  $J = 10.5, 5.5$  Hz, 1H), 2.35 (s, 3H), 0.85 (s, 10H), -0.03 – -0.09 (m, 6H).

$^{13}C$  NMR (151 MHz,  $CDCl_3$ )  $\delta$  135.95, 134.44, 130.61, 128.02, 126.33, 126.21, 119.46 (q,  $J = 321.2$  Hz), 65.61, 56.40, 25.70, 19.07, 18.23, -5.70, -5.85.

HRMS (ESI-TOF)  $m/z$  Calcd for  $C_{16}H_{27}F_3NO_3SSi^+$   $[MH]^+$  398.1427, found 398.1428.

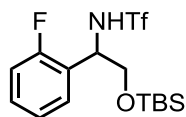

**7c** *N*-(2-((*tert*-butyldimethylsilyloxy)-1-(2-fluorophenyl)ethyl)-1,1,1-trifluoromethanesulfonamide

$^1H$  NMR (600 MHz,  $CDCl_3$ )  $\delta$  7.42 – 7.30 (m, 2H), 7.18 (t,  $J = 7.5$  Hz, 1H), 7.13 – 7.06 (m, 1H), 6.08 (d,  $J = 8.3$  Hz, 1H), 5.04 (ddd,  $J = 8.3, 4.7$  Hz, 4.4 Hz, 1H), 3.99 (dd,  $J = 10.4, 4.4$  Hz, 1H), 3.86 (dd,  $J = 10.4, 4.7$  Hz, 1H), 0.86 (s, 9H), -0.03 (s, 3H), -0.04 (s, 3H).

$^{13}C$  NMR (151 MHz,  $CDCl_3$ )  $\delta$  159.77 (d,  $J = 245.7$  Hz), 129.87 (d,  $J = 8.5$  Hz), 128.64 (d,  $J = 3.6$  Hz), 125.19 (d,  $J = 13.0$  Hz), 124.23 (d,  $J = 3.3$  Hz), 119.47 (q,  $J = 321.0$  Hz), 115.58 (d,  $J = 21.8$  Hz), 65.60, 55.35, 25.60, 18.15, -5.89, -5.97.

HRMS (ESI-TOF)  $m/z$  Calcd for  $C_{15}H_{24}F_4NO_3SSi^+$   $[MH]^+$  402.1177, found 402.1179.

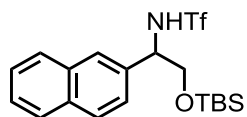

**7d N-(2-((*tert*-butyldimethylsilyl)oxy)-1-(naphthalen-2-yl)ethyl)-1,1,1-trifluoromethanesulfonamide**

<sup>1</sup>H NMR (600 MHz, CDCl<sub>3</sub>) δ 7.87 – 7.79 (m, 3H), 7.77 (s, 1H), 7.54 – 7.46 (m, 2H), 7.40 (d, *J* = 8.5 Hz, 1H), 5.86 (d, *J* = 7.4 Hz, 1H), 4.93 – 4.83 (m, 1H), 4.03 (dd, *J* = 10.4, 3.8 Hz, 1H), 3.87 (dd, *J* = 10.4, 4.3 Hz, 1H), 0.85 (s, 9H), -0.04 (s, 3H), -0.07 (s, 3H).

<sup>13</sup>C NMR (151 MHz, CDCl<sub>3</sub>) δ 135.38, 133.05, 133.03, 128.52, 127.96, 127.67, 126.48, 126.35, 125.89, 124.20, 119.52 (q, *J* = 321.2 Hz), 66.59, 60.12, 25.69, 18.21, -5.68, -5.78.

HRMS (ESI-TOF) *m/z* Calcd for C<sub>19</sub>H<sub>27</sub>F<sub>3</sub>NO<sub>3</sub>SSi<sup>+</sup> [MH]<sup>+</sup> 434.1427, found 434.1424.

**Optimization of the Reaction Conditions**

**Table S1.** Optimization of enantioselective C–H iodination

| entry                  | ligand                                                            |                       | conv. (%) <sup>*</sup>      | ee <sup>†</sup>             |                             | s <sup>‡</sup>                  |
|------------------------|-------------------------------------------------------------------|-----------------------|-----------------------------|-----------------------------|-----------------------------|---------------------------------|
|                        | R <sub>1</sub>                                                    | R <sub>2</sub>        |                             | 2a                          | 3a                          |                                 |
| 1                      | C <sub>6</sub> H <sub>5</sub>                                     | <sup>n</sup> Pr       | 38                          | 50                          | 83                          | 17.6                            |
| 2                      | C <sub>6</sub> H <sub>5</sub>                                     | <sup>n</sup> Bu       | 48                          | 77                          | 83                          | 24.8                            |
| <b>3</b>               | <b>C<sub>6</sub>H<sub>5</sub></b>                                 | <b><sup>i</sup>Bu</b> | <b>49</b>                   | <b>86</b>                   | <b>88</b>                   | <b>50</b>                       |
| 4                      | C <sub>6</sub> H <sub>5</sub>                                     | neopentyl             | 33                          | 31                          | 63                          | 5.9                             |
| 5                      | C <sub>6</sub> H <sub>5</sub>                                     | <sup>i</sup> Pr       | 48                          | 79                          | 87                          | 30.8                            |
| 6                      | C <sub>6</sub> H <sub>5</sub>                                     | <sup>t</sup> Bu       | 25                          | 23                          | 70                          | 6.8                             |
| 7                      | 2-CF <sub>3</sub> C <sub>6</sub> H <sub>4</sub>                   | <sup>i</sup> Bu       | 48                          | 80                          | 88                          | 34.2                            |
| 8                      | 3,5-(CF <sub>3</sub> ) <sub>2</sub> C <sub>6</sub> H <sub>3</sub> | <sup>i</sup> Bu       | 45                          | 39                          | 47                          | 4.1                             |
| 9                      | 4-OMeC <sub>6</sub> H <sub>4</sub>                                | <sup>i</sup> Bu       | 57                          | 90                          | 73                          | 15.5                            |
| 10                     | 4-FC <sub>6</sub> H <sub>4</sub>                                  | <sup>i</sup> Bu       | 46                          | 70                          | 83                          | 21.2                            |
| 11                     | 1-naphthyl                                                        | <sup>i</sup> Bu       | 39                          | 50                          | 81                          | 13.3                            |
| 12                     | 2-naphthyl                                                        | <sup>i</sup> Bu       | 47                          | 77                          | 88                          | 32.9                            |
| 13                     | Me                                                                | <sup>i</sup> Bu       | 24                          | 15                          | 48                          | 3.2                             |
| 14                     | CF <sub>3</sub>                                                   | <sup>i</sup> Bu       | 5                           | 1                           | 21                          | 1.5                             |
| 15                     | <sup>t</sup> BuO                                                  | <sup>i</sup> Bu       | 38                          | 24                          | 39                          | 2.9                             |
| 16 <sup>§</sup>        | C <sub>6</sub> H <sub>5</sub>                                     | <sup>i</sup> Bu       | 50                          | 89                          | 90                          | 62.0                            |
| <b>17<sup>  </sup></b> | <b>C<sub>6</sub>H<sub>5</sub></b>                                 | <b><sup>i</sup>Bu</b> | <b>50 (50<sup>  </sup>)</b> | <b>92 (89<sup>  </sup>)</b> | <b>92 (89<sup>  </sup>)</b> | <b>78.8 (51.2<sup>  </sup>)</b> |
| 18 <sup>#</sup>        | C <sub>6</sub> H <sub>5</sub>                                     | <sup>i</sup> Bu       | 54                          | 94.5                        | 80                          | 33.0                            |

Reaction conditions: 10 mol% Pd(OAc)<sub>2</sub>, 40 mol% Ligand, 3 eq. Na<sub>2</sub>CO<sub>3</sub>, 3 eq. CsOAc, 3 eq. I<sub>2</sub>, 15eq. DMSO, 1mL <sup>t</sup>amyl-OH, air, 20°C, 24h <sup>\*</sup>Calculated conversion, c = ee<sub>2a</sub> / (ee<sub>2a</sub> + ee<sub>3a</sub>). <sup>†</sup>Determined by chiral HPLC analysis. <sup>‡</sup>Selectivity(s) = (rate of fast-reacting enantiomer) / (rate of slow-reacting enantiomer). <sup>§</sup>0.5 mL <sup>t</sup>amyl-OH. <sup>||</sup>0.5 mL <sup>t</sup>amyl-OH/ DMSO (5 : 2.2). <sup>||</sup>Reaction conditions: 2 mol% Pd(OAc)<sub>2</sub>, 10 mol% Bz-Leu-OH, 3 equiv. CsOAc, 3 equiv. Na<sub>2</sub>CO<sub>3</sub>, 3 equiv. I<sub>2</sub>, 0.5 mL <sup>t</sup>amyl-OH/DMSO (5 : 2.2), air, 20°C, 24h, then 3 equiv. I<sub>2</sub>, 20°C, 24h. <sup>#</sup>20 mol% Ligand.

### General Procedure for Pd(OAc)<sub>2</sub>-Catalyzed C–H Iodination

To a 10 mL sealed tube was added substrates (1 equiv., 0.2 mmol), Pd(OAc)<sub>2</sub> (10 mol%, 0.02 mmol), Bz-Leu-OH (40 mol%, 0.08 mmol), CsOAc (3 equiv., 0.6 mmol), I<sub>2</sub> (3 equiv., 0.6 mmol), Na<sub>2</sub>CO<sub>3</sub> (3 equiv., 0.6 mmol) and *t*-amyl-OH / DMSO (1 mL, v / v = 5 : 2.2). The mixture was stirred at 20 °C for 24-48 h. The resulting mixture was diluted by EtOAc, filtered through a pad of celite and washed with Na<sub>2</sub>S<sub>2</sub>O<sub>3</sub>. The organic layer was dried over MgSO<sub>4</sub>, evaporated and purified by prep-TLC (EtOAc: hexanes= 1:5-1:15) to give the product and ee was determined on a Hitachi LaChrow HPLC system using commercially available chiral columns as described below.

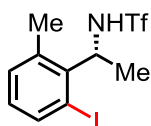

### 3a 1,1,1-trifluoro-*N*-(1-(2-iodo-6-methylphenyl)ethyl)methanesulfonamide

The compound **3a** was prepared according to the general procedure and was purified by prep-TLC to give a colorless oil in 48 % yield (37 mg). <sup>1</sup>H NMR (600 MHz, CDCl<sub>3</sub>) δ 7.76 (d, *J* = 7.8 Hz, 1H), 7.18 (d, *J* = 7.3 Hz, 1H), 6.87 (t, *J* = 7.7 Hz, 1H), 6.52 (d, *J* = 8.7 Hz, 0.8H), 5.53 (s, 0.2H), 5.35 – 5.21 (m, 1H), 2.51 (s, 0.7H), 2.42 (s, 2.3H), 1.73 (d, *J* = 7.0 Hz, 2.3H), 1.62 (s, 0.7H). <sup>13</sup>C NMR (151 MHz, CDCl<sub>3</sub>) δ 140.11, 139.37, 138.10, 131.28, 129.50, 119.32 (q, *J* = 321.2 Hz), 51.86, 20.76, 20.51. HPLC chiralcel AS-H column (5 % isopropanol in hexanes, 0.5 mL/min) *t*<sub>r</sub> = 12.340 min (major), 16.660 min (minor): 91 % ee. HRMS (ESI-TOF) *m/z* Calcd for C<sub>10</sub>H<sub>10</sub>F<sub>3</sub>INO<sub>2</sub>S<sup>-</sup> [M-H]<sup>-</sup> 391.9435, found 391.9436.

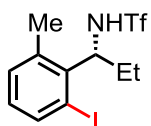

### 3b 1,1,1-trifluoro-*N*-(1-(2-iodo-6-methylphenyl)propyl)methanesulfonamide

The compound **3b** was prepared according to the general procedure and was purified by prep-TLC to give a colorless oil in 49% yield (40 mg). <sup>1</sup>H NMR (600 MHz, CDCl<sub>3</sub>) δ 7.76 (d, *J* = 7.9 Hz, 1H), 7.18 (d, *J* = 7.5 Hz, 0.8H), 7.14 (d, *J* = 7.5 Hz, 0.2H), 6.91 – 6.83 (m, 1H), 6.44 (d, *J* = 9.7 Hz, 0.8H), 5.36 (m, 0.2H), 5.29 (m, 0.2H), 5.01 (m, 0.8H), 2.47 (s, 0.6H), 2.40 (s, 2.4H), 2.25 – 2.16 (m, 0.8H), 2.16 – 2.06 (m, 0.8H), 1.97 – 1.91 (m, 0.4H), 1.09 (t, *J* = 7.4 Hz, 0.6H), 0.99 (t, *J* = 7.4 Hz, 2.4H). <sup>13</sup>C NMR (151 MHz, CDCl<sub>3</sub>) δ 140.15, 139.45, 138.91, 138.54, 138.52, 135.76, 132.98, 131.23, 129.48, 129.36, 119.29 (q, *J* = 321.1 Hz), 101.96, 93.59, 66.79, 57.48, 27.84, 27.28, 21.08, 20.90, 11.02, 10.85. HPLC chiralcel AS-H column (5 % isopropanol in hexanes, 0.5 mL/min) *t*<sub>r</sub> = 11.153 min (major), 13.567 min (minor): 89 % ee. HRMS (ESI-TOF) *m/z* Calcd for C<sub>11</sub>H<sub>13</sub>F<sub>3</sub>INaNO<sub>2</sub>S<sup>+</sup> [MNa]<sup>+</sup> 429.9556, found 429.9553.

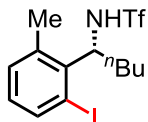

### 3c 1,1,1-trifluoro-*N*-(1-(2-iodo-6-methylphenyl)pentyl)methanesulfonamide

The compound **3c** was prepared according to the general procedure and was purified by prep-TLC to give a colorless oil in 45 % yield (39 mg).  $^1\text{H}$  NMR (600 MHz,  $\text{CDCl}_3$ )  $\delta$  7.76 (d,  $J = 7.9$  Hz, 1H), 7.18 (d,  $J = 7.5$  Hz, 0.8H), 7.14 (d,  $J = 7.6$  Hz, 0.2H), 6.90 – 6.82 (m, 1H), 6.43 (s, 0.8H), 5.38 – 5.32 (m, 0.2H), 5.08 (t,  $J = 7.4$  Hz, 0.8H), 2.48 (s, 0.6H), 2.40 (s, 2.4H), 2.26 – 2.16 (m, 0.8H), 2.06 – 1.98 (m, 0.8H), 1.94 – 1.84 (m, 0.4H), 1.51 – 1.30 (m, 3H), 1.30 – 1.19 (m, 1H), 0.96 – 0.88 (m, 3H).  $^{13}\text{C}$  NMR (151 MHz,  $\text{CDCl}_3$ )  $\delta$  140.14, 139.70, 138.86, 138.74, 138.56, 135.75, 132.99, 131.24, 129.44, 129.33, 119.26 (q,  $J = 321.1$  Hz), 101.71, 93.66, 65.46, 56.03, 34.32, 33.78, 28.35, 28.25, 22.23, 22.20, 21.14, 20.87, 13.85, 13.84. HPLC chiralcel AS-H column (5 % isopropanol in hexanes, 0.3 mL/min)  $t_r = 17.227$  min (major), 19.080 min (minor): 87 % ee. HRMS (ESI-TOF)  $m/z$  Calcd for  $\text{C}_{13}\text{H}_{17}\text{F}_3\text{INaNO}_2\text{S}^+ [\text{MNa}]^+$  457.9869, found 457.9868.

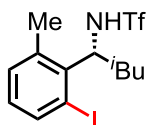

### 3d 1,1,1-trifluoro-*N*-(1-(2-iodo-6-methylphenyl)-3-methylbutyl)methanesulfonamide

The compound **3d** was prepared according to the general procedure and was purified by prep-TLC to give a colorless oil in 42 % yield (37 mg).  $^1\text{H}$  NMR (600 MHz,  $\text{CDCl}_3$ )  $\delta$  7.75 (d,  $J = 6.0$  Hz, 1H), 7.20 – 7.10 (m, 1H), 6.86 (dd,  $J = 6.9, 6.9$  Hz, 1H), 6.42 (d,  $J = 8.4$  Hz, 0.8H), 5.42 (s, 0.2H), 5.38 (s, 0.2H), 5.17 (s, 0.8H), 2.48 (s, 0.6H), 2.40 (s, 2.4H), 1.98 – 1.67 (m, 2H), 1.57 – 1.49 (m, 1H), 1.01 (d,  $J = 5.4$  Hz, 6H).  $^{13}\text{C}$  NMR (151 MHz,  $\text{CDCl}_3$ )  $\delta$  140.14, 139.89, 139.25, 138.61, 138.33, 135.91, 133.01, 131.27, 129.38, 129.30, 119.20 (q,  $J = 321.0$  Hz), 101.07, 93.76, 63.95, 54.36, 43.23, 42.90, 25.01, 24.63, 23.52, 23.31, 21.37, 21.22, 20.74. HPLC chiralcel AS-H column (5 % isopropanol in hexanes, 0.5 mL/min)  $t_r = 8.427$  min (major), 9.567 min (minor): 81 % ee. HRMS (ESI-TOF)  $m/z$  Calcd for  $\text{C}_{13}\text{H}_{17}\text{F}_3\text{INaNO}_2\text{S}^+ [\text{MNa}]^+$  457.9869, found 457.9870.

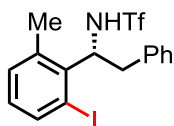

### 3e 1,1,1-trifluoro-*N*-(1-(2-iodo-6-methylphenyl)-2-phenylethyl)methanesulfonamide

The compound **3e** was prepared according to the general procedure and was purified by prep-TLC to give a colorless oil in 44 % yield (41 mg).  $^1\text{H}$  NMR (500 MHz,  $\text{CDCl}_3$ )  $\delta$  7.81 (d,  $J = 7.8$  Hz, 0.8H), 7.76 (d,  $J = 7.4$  Hz, 0.2H), 7.39 – 7.14 (m, 4H), 7.04 (d,  $J = 8.1$  Hz, 2H), 6.92 – 6.80 (m, 1H), 6.53 (d,  $J = 10.0$  Hz, 0.8H), 5.65 – 5.57 (m, 0.2H), 5.32 – 5.24 (m, 0.8H), 5.22 (s, 0.2H), 3.58 (dd,  $J = 13.5, 9.1$  Hz, 0.8H), 3.33 (dd,  $J = 13.5, 7.1$  Hz, 0.8H), 3.25 (dd,  $J = 14.2, 5.5$  Hz, 0.2H), 3.03 (dd,  $J = 14.2, 10.3$  Hz, 0.2H), 2.50 (s, 0.4H), 2.01 (s, 2.6H).  $^{13}\text{C}$  NMR

(151 MHz, CDCl<sub>3</sub>)  $\delta$  140.06, 139.58, 138.66, 138.54, 137.49, 136.21, 135.86, 135.27, 133.12, 131.07, 129.71, 129.54, 129.33, 129.23, 128.99, 128.54, 127.65, 127.20, 119.20 (q,  $J = 321.2$  Hz), 101.52, 94.12, 66.47, 57.22, 40.45, 40.24, 21.45, 20.48. HPLC chiralcel AS-H column (5% isopropanol in hexanes, 0.5 mL/min)  $t_r =$  14.480 min (major), 18.213 min (minor): 75 % ee. HRMS (ESI-TOF)  $m/z$  Calcd for C<sub>16</sub>H<sub>15</sub>F<sub>3</sub>INaNO<sub>2</sub>S<sup>+</sup> [MNa]<sup>+</sup> 491.9713, found 491.9708.

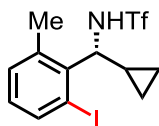

### 3f *N*-(cyclopropyl(2-iodo-6-methylphenyl)methyl)-1,1,1-trifluoromethanesulfonamide

The compound **3f** was prepared according to the general procedure and was purified by prep-TLC to give a colorless oil in 42 % yield (35 mg). <sup>1</sup>H NMR (600 MHz, CDCl<sub>3</sub>)  $\delta$  7.80 (d,  $J = 7.8$  Hz, 0.7H), 7.74 (d,  $J = 7.9$  Hz, 0.3H), 7.18 (d,  $J = 7.6$  Hz, 0.7H), 7.16 (d,  $J = 7.5$  Hz, 0.3H), 6.88 (dd,  $J = 7.8, 7.7$  Hz, 0.7H), 6.84 (dd,  $J = 7.8, 7.7$  Hz, 0.3H), 4.64 (d,  $J = 9.3$  Hz, 0.3H), 4.29 (d,  $J = 9.7$  Hz, 0.7H), 2.56 (s, 1H), 2.35 (s, 2H), 2.05 – 1.96 (m, 0.7H), 1.46 – 1.39 (m, 0.3H), 0.85 – 0.41 (m, 4H). <sup>13</sup>C NMR (151 MHz, CDCl<sub>3</sub>)  $\delta$  140.13, 139.41, 138.32, 138.21, 136.75, 132.87, 131.30, 129.40, 129.19, 119.39 (q,  $J = 321.2$  Hz), 102.12, 94.49, 68.88, 60.76, 21.02, 20.98, 16.58, 15.69, 5.90, 5.26, 5.14, 4.79. HPLC chiralcel AS-H column (5 % isopropanol in hexanes, 0.5 mL/min)  $t_r =$  13.733 min (major), 19.760 min (minor): 95 % ee. HRMS (ESI-TOF)  $m/z$  Calcd for C<sub>12</sub>H<sub>13</sub>F<sub>3</sub>INaNO<sub>2</sub>S<sup>+</sup> [MNa]<sup>+</sup> 441.9556, found 441.9556.

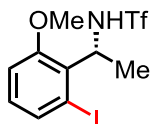

### 3g 1,1,1-trifluoro-*N*-(1-(2-iodo-6-methoxyphenyl)ethyl)methanesulfonamide

The compound **3g** was prepared according to the general procedure and was purified by prep-TLC to give a colorless oil in 46 % yield (38 mg). <sup>1</sup>H NMR (600 MHz, CDCl<sub>3</sub>)  $\delta$  7.49 (d,  $J = 7.6$  Hz, 1H), 7.00 – 6.90 (m, 2H), 6.51 (d,  $J = 9.7$  Hz, 1H), 5.27 – 5.18 (m, 1H), 3.92 (s, 3H), 1.58 – 1.53 (m, 3H). <sup>13</sup>C NMR (151 MHz, CDCl<sub>3</sub>)  $\delta$  156.69, 132.69, 131.31, 130.28, 119.38 (q,  $J = 321.1$  Hz), 111.82, 99.22, 60.27, 55.94, 21.36. HPLC chiralcel AS-H column (5 % isopropanol in hexanes, 0.8 mL/min)  $t_r =$  9.387 min (major), 21.127 min (minor): 97 % ee. HRMS (ESI-TOF)  $m/z$  Calcd for C<sub>10</sub>H<sub>11</sub>F<sub>3</sub>INaNO<sub>3</sub>S<sup>+</sup> [MNa]<sup>+</sup> 431.9349, found 431.9351.

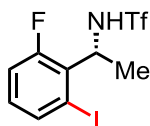

### 3h 1,1,1-trifluoro-*N*-(1-(2-fluoro-6-iodophenyl)ethyl)methanesulfonamide



The compound **3h** was prepared according to the general procedure and was purified by prep-TLC to give a colorless oil in 47 % yield (37 mg). <sup>1</sup>H NMR (600 MHz, CDCl<sub>3</sub>) δ 7.67 (d, *J* = 7.9 Hz, 1H), 7.21 – 7.08 (m, 1H), 7.08 – 6.98 (m, 1H), 5.77 (s, 1H), 5.37 – 5.17 (m, 1H), 1.61 (d, *J* = 7.0 Hz, 3H). <sup>13</sup>C NMR (151 MHz, CDCl<sub>3</sub>) δ 160.13 (d, *J* = 250.5 Hz), 136.00 (d, *J* = 2.2 Hz), 131.45 (d, *J* = 15.3 Hz), 130.97 (d, *J* = 9.8 Hz), 119.30 (q, *J* = 320.7 Hz), 116.77 (d, *J* = 23.0 Hz), 99.57, 58.93, 21.80. HPLC chiralcel AS-H column (5 % isopropanol in hexanes, 0.8 mL/min) *t*<sub>r</sub> = 8.447 min (major), 12.593 min (minor): 96 % ee. HRMS (ESI-TOF) *m/z* Calcd for C<sub>9</sub>H<sub>7</sub>F<sub>4</sub>INO<sub>2</sub>S<sup>-</sup> [M-H]<sup>-</sup> 395.9184, found 395.9189.

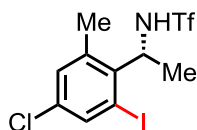

### 3i *N*-(1-(4-chloro-2-iodo-6-methylphenyl)ethyl)-1,1,1-trifluoromethanesulfonamide

The compound **3i** was prepared according to the general procedure and was purified by prep-TLC to give a colorless oil in 49 % yield (42 mg). <sup>1</sup>H NMR (600 MHz, CDCl<sub>3</sub>) δ 7.78 (s, 1H), 7.19 (s, 1H), 6.39 (d, *J* = 8.2 Hz, 1H), 5.33 – 5.19 (m, 1H), 2.59 – 2.27 (m, 3H), 1.82 – 1.57 (m, 3H). <sup>13</sup>C NMR (151 MHz, CDCl<sub>3</sub>) δ 139.18, 138.49, 138.07, 136.35, 133.99, 133.49, 131.14, 130.70, 126.84, 126.20, 119.43 (q, *J* = 321.1 Hz), 99.57, 93.16, 51.46, 51.00, 40.72, 23.43, 20.70, 20.40, 18.84. HPLC chiralcel AS-H column (5 % isopropanol in hexanes, 0.5 mL/min) *t*<sub>r</sub> = 12.047 min (major), 15.640 min (minor): 93 % ee. HRMS (ESI-TOF) *m/z* Calcd for C<sub>10</sub>H<sub>9</sub>ClF<sub>3</sub>INO<sub>2</sub>S<sup>-</sup> [M-H]<sup>-</sup> 425.9045, found 425.9047.

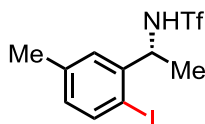

### 3j 1,1,1-trifluoro-*N*-(1-(2-iodo-5-methylphenyl)ethyl)ethanesulfonamide

The compound **3j** was prepared according to the general procedure and was purified by prep-TLC to give a colorless oil in 34 % yield (27 mg). <sup>1</sup>H NMR (600 MHz, CDCl<sub>3</sub>) δ 7.69 (d, *J* = 8.0 Hz, 1H), 7.08 (s, 1H), 6.83 (d, *J* = 9.4 Hz, 1H), 5.47 (s, 1H), 5.03 (m, 1H), 2.31 (s, 3H), 1.55 (d, *J* = 6.9 Hz, 3H). <sup>13</sup>C NMR (151 MHz, CDCl<sub>3</sub>) δ 143.20, 139.91, 139.19, 130.84, 127.14, 119.36 (q, *J* = 321.3 Hz), 92.83, 59.07, 23.46, 21.03. HPLC chiralcel AS-H column (5 % isopropanol in hexanes, 0.8 mL/min) *t*<sub>r</sub> = 7.967 min (major), 15.753 min (minor): 92 % ee. HRMS (ESI-TOF) *m/z* Calcd for C<sub>10</sub>H<sub>11</sub>F<sub>3</sub>INaNO<sub>2</sub>S<sup>+</sup> [MNa]<sup>+</sup> 415.9400, found 415.9392.

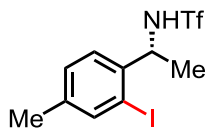

### 3k 1,1,1-trifluoro-*N*-(1-(2-iodo-4-methylphenyl)ethyl)ethanesulfonamide

The compound **3k** was prepared according to the general procedure and was purified by prep-TLC to give

a colorless oil in 35 % yield (28 mg).  $^1\text{H}$  NMR (600 MHz,  $\text{CDCl}_3$ )  $\delta$  7.69 (s, 1H), 7.20 (d,  $J = 7.9$  Hz, 1H), 7.16 (d,  $J = 7.9$  Hz, 1H), 5.05 (q,  $J = 6.8$  Hz, 1H), 2.30 (s, 3H), 1.55 (d,  $J = 6.8$  Hz, 3H).  $^{13}\text{C}$  NMR (151 MHz,  $\text{CDCl}_3$ )  $\delta$  140.61, 140.56, 140.01, 129.83, 125.95, 119.36 (q,  $J = 321.2$  Hz), 96.92, 58.93, 23.55, 20.42. HPLC chiralcel AS-H column (10 % isopropanol in hexanes, 0.3 mL/min)  $t_r = 17.080$  min (major), 41.727 min (minor): 95 % ee. HRMS (ESI-TOF)  $m/z$  Calcd for  $\text{C}_{10}\text{H}_{11}\text{F}_3\text{INaNO}_2\text{S}^+$   $[\text{MNa}]^+$  415.9400, found 415.9392.

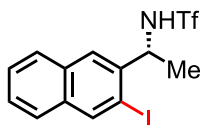

### 31 1,1,1-trifluoro-*N*-(1-(3-iodonaphthalen-2-yl)ethyl)methanesulfonamide

The compound **31** was prepared according to the general procedure and was purified by prep-TLC to give a colorless oil in 37 % yield (32 mg).  $^1\text{H}$  NMR (600 MHz,  $\text{CDCl}_3$ )  $\delta$  8.42 (s, 1H), 7.83 – 7.70 (m, 3H), 7.57 – 7.49 (m, 2H), 5.57 (d,  $J = 6.9$  Hz, 1H), 5.26 – 5.18 (m, 1H), 1.68 (d,  $J = 6.9$  Hz, 3H).  $^{13}\text{C}$  NMR (151 MHz,  $\text{CDCl}_3$ )  $\delta$  139.90, 139.86, 134.30, 132.72, 127.78, 127.29, 127.26, 126.51, 125.45, 119.38 (q,  $J = 321.1$  Hz), 93.64, 58.97, 23.86. HPLC chiralcel AS-H column (5 % isopropanol in hexanes, 0.5 mL/min)  $t_r = 17.880$  min (major), 36.760 min (minor): 95 % ee. HRMS (ESI-TOF)  $m/z$  Calcd for  $\text{C}_{13}\text{H}_{11}\text{F}_3\text{INaNO}_2\text{S}^+$   $[\text{MNa}]^+$  451.9400, found 451.9403.

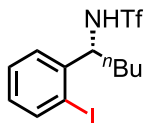

### 3m-mono 1,1,1-trifluoro-*N*-(1-(2-iodophenyl)pentyl)methanesulfonamide

The compound **3m-mono** was prepared according to the general procedure and was purified by prep-TLC to give a colorless oil in 17 % yield (14 mg).  $^1\text{H}$  NMR (600 MHz,  $\text{CDCl}_3$ )  $\delta$  7.85 (dd,  $J = 7.9, 1.2$  Hz, 1H), 7.38 (td,  $J = 7.5, 1.2$  Hz, 1H), 7.21 (dd,  $J = 7.8, 1.6$  Hz, 1H), 7.05 – 6.95 (m, 1H), 5.45 (s, 1H), 4.91 (ddd,  $J = 8.5$  Hz, 1H), 1.93 – 1.82 (m, 1H), 1.78 – 1.67 (m, 1H), 1.51 – 1.25 (m, 4H), 0.92 (t,  $J = 7.1$  Hz, 3H).  $^{13}\text{C}$  NMR (151 MHz,  $\text{CDCl}_3$ )  $\delta$  142.98, 140.21, 129.66, 128.85, 126.71, 119.30 (q,  $J = 321.2$  Hz), 63.15, 37.09, 27.92, 22.12, 13.82. HPLC chiralcel AS-H column (10 % isopropanol in hexanes, 0.5 mL/min)  $t_r = 10.893$  min (major), 11.773 min (minor): 87 % ee. HRMS (ESI-TOF)  $m/z$  Calcd for  $\text{C}_{12}\text{H}_{15}\text{F}_3\text{INaNO}_2\text{S}^+$   $[\text{MNa}]^+$  443.9712, found 443.9711.

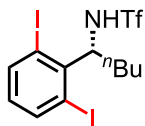

### 3m-di *N*-(1-(2,6-diiodophenyl)pentyl)-1,1,1-trifluoromethanesulfonamide

The compound **3m-di** was prepared according to the general procedure and was purified by prep-TLC to

give a colorless oil in 24 % yield (26 mg).  $^1\text{H}$  NMR (600 MHz,  $\text{CDCl}_3$ )  $\delta$  8.06 – 7.84 (m, 2H), 6.64 (t,  $J = 7.9$  Hz, 1H), 6.32 (br s, 1H), 5.33 (dd,  $J = 9.6, 6.2$  Hz, 1H), 2.17 – 2.06 (m, 1H), 2.00 – 1.87 (m, 1H), 1.59 – 1.31 (m, 4H), 0.94 (t,  $J = 7.2$  Hz, 3H).  $^{13}\text{C}$  NMR (151 MHz,  $\text{CDCl}_3$ )  $\delta$  142.52, 141.25, 140.80, 130.87, 119.21 (q,  $J = 321.1$  Hz), 102.69, 92.22, 65.79, 33.44, 28.05, 22.18, 13.84. HPLC chiralcel AS-H column (10 % isopropanol in hexanes, 0.5 mL/min)  $t_r = 10.400$  min (major), 12.860 min (minor): 99 % ee. HRMS (ESI-TOF)  $m/z$  Calcd for  $\text{C}_{12}\text{H}_{15}\text{F}_3\text{INaNO}_2\text{S}^+ [\text{MNa}]^+$  569.8679, found 569.8680.

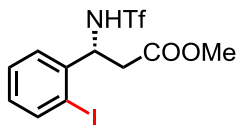

#### 6a-mono methyl 3-(2-iodophenyl)-3-((trifluoromethyl)sulfonamido)propanoate

The compound **6a-mono** was prepared according to the general procedure and was purified by prep-TLC to give a colorless oil in 31 % yield (27 mg).  $^1\text{H}$  NMR (400 MHz,  $\text{CDCl}_3$ )  $\delta$  7.85 (dd,  $J = 7.9, 1.1$  Hz, 1H), 7.47 – 7.33 (m, 2H), 7.13 (d,  $J = 8.7$  Hz, 1H), 7.03 (ddd,  $J = 7.9, 7.0, 2.1$  Hz, 1H), 5.25 (dt,  $J = 9.5, 5.0$  Hz, 1H), 3.66 (s, 3H), 2.98 (d,  $J = 5.0$  Hz, 2H).  $^{13}\text{C}$  NMR (151 MHz,  $\text{CDCl}_3$ )  $\delta$  171.22, 140.77, 140.08, 130.04, 128.78, 127.30, 119.32 (q,  $J = 322.1, 321.4$  Hz), 97.19, 58.89, 52.32, 39.04. HPLC chiralcel AD-H column (10 % isopropanol in hexanes, 0.2 mL/min)  $t_r = 29.827$  min (minor), 32.413 min (major): 96 % ee. HRMS (ESI-TOF)  $m/z$  Calcd for  $\text{C}_{11}\text{H}_{12}\text{F}_3\text{INO}_4\text{S}^+ [\text{MH}]^+$  437.9478, found 437.9477.

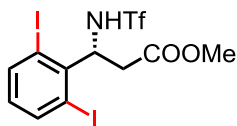

#### 6a-di methyl 3-(2,6-diiodophenyl)-3-((trifluoromethyl)sulfonamido)propanoate

The compound **6a-di** was prepared according to the general procedure and was purified by prep-TLC to give a colorless oil in 16 % yield (18 mg).  $^1\text{H}$  NMR (600 MHz,  $\text{CDCl}_3$ )  $\delta$  7.95 (m, 2H), 6.67 (t,  $J = 7.9$  Hz, 1H), 6.52 (d,  $J = 9.1$  Hz, 1H), 5.88 (ddd,  $J = 10.3, 9.1, 5.0$  Hz, 1H), 3.78 (s, 3H), 3.27 (dd,  $J = 15.4, 10.3$  Hz, 1H), 2.85 (dd,  $J = 15.4, 5.0$  Hz, 1H).  $^{13}\text{C}$  NMR (151 MHz,  $\text{CDCl}_3$ )  $\delta$  168.79, 142.54, 140.99, 139.67, 131.43, 119.13 (q,  $J = 321.4$  Hz), 102.15, 92.52, 62.73, 52.45, 38.23. HRMS (ESI-TOF)  $m/z$  Calcd for  $\text{C}_{11}\text{H}_9\text{F}_3\text{I}_2\text{NO}_4\text{S}^- [\text{M-H}]^-$  561.8299, found 561.8301.

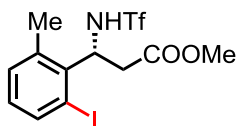

#### 6b methyl 3-(2-iodo-6-methylphenyl)-3-((trifluoromethyl)sulfonamido)propanoate

The compound **6b** was prepared according to the general procedure and was purified by prep-TLC to give

a colorless oil in 49 % yield (44 mg).  $^1\text{H}$  NMR (600 MHz,  $\text{CDCl}_3$ )  $\delta$  7.76 (d,  $J = 7.6$  Hz, 1H), 7.23 – 7.11 (m, 1H), 6.90 (dd,  $J = 7.6, 7.4$  Hz, 1H), 5.75 (s, 0.2H), 5.69 – 5.62 (m, 0.8H), 3.77 (s, 0.6H), 3.71 (s, 2.4H), 3.33 (dd,  $J = 15.5, 8.8$  Hz, 0.8H), 3.06 (dd,  $J = 15.5, 5.6$  Hz, 0.8H), 2.91 (s, 0.2H), 2.80 (s, 0.2H), 2.51 (s, 3H).  $^{13}\text{C}$  NMR (151 MHz,  $\text{CDCl}_3$ )  $\delta$  176.61, 169.61, 140.04, 139.36, 138.49, 137.55, 133.14, 131.51, 130.05, 129.66, 119.20 (q,  $J = 321.2$  Hz), 99.56, 93.97, 52.55, 52.26, 39.27, 38.79, 21.25, 20.70. HPLC chiralcel AS-H column (10 % isopropanol in hexanes, 0.3 mL/min)  $t_r = 29.640$  min (minor), 31.907 min (major): 96 % ee. HRMS (ESI-TOF)  $m/z$  Calcd for  $\text{C}_{12}\text{H}_{14}\text{F}_3\text{INO}_4\text{S}^+$   $[\text{MH}]^+$  451.9635, found 451.9633.

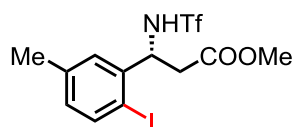

### 6c methyl 3-(2-iodo-5-methylphenyl)-3-((trifluoromethyl)sulfonamido)propanoate

The compound **6c** was prepared according to the general procedure and was purified by prep-TLC to give a colorless oil in 44 % yield (40 mg).  $^1\text{H}$  NMR (600 MHz,  $\text{CDCl}_3$ )  $\delta$  7.70 (d,  $J = 8.0$  Hz, 1H), 7.21 (s, 1H), 7.05 (d,  $J = 9.1$  Hz, 1H), 6.85 (d,  $J = 8.0$  Hz, 1H), 5.21 (dt,  $J = 9.1, 5.1$  Hz, 1H), 3.67 (s, 3H), 2.95 (d,  $J = 5.1$  Hz, 2H), 2.32 (s, 3H).  $^{13}\text{C}$  NMR (151 MHz,  $\text{CDCl}_3$ )  $\delta$  171.18, 140.46, 139.76, 138.96, 131.06, 128.11, 119.35 (q,  $J = 320.7$  Hz) 93.03, 58.77, 52.27, 39.14, 21.10. HPLC chiralcel AD-H column (5 % isopropanol in hexanes, 0.5 mL/min)  $t_r = 11.980$  min (minor), 14.693 min (major): 94 % ee. HRMS (ESI-TOF)  $m/z$  Calcd for  $\text{C}_{12}\text{H}_{14}\text{F}_3\text{INO}_4\text{S}^+$   $[\text{MH}]^+$  451.9635, found 451.9629.

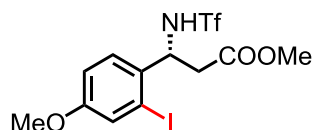

### 6d methyl 3-(2-iodo-4-methoxyphenyl)-3-((trifluoromethyl)sulfonamido)propanoate

The compound **6d** was prepared according to the general procedure and was purified by prep-TLC to give a colorless oil in 33 % yield (30 mg).  $^1\text{H}$  NMR (500 MHz,  $\text{CDCl}_3$ )  $\delta$  7.37 (d,  $J = 2.6$  Hz, 1H), 7.30 (d,  $J = 8.7$  Hz, 1H), 6.92 (dd,  $J = 8.7, 2.6$  Hz, 1H), 5.20 (t,  $J = 5.1$  Hz, 1H), 3.79 (s, 3H), 3.66 (s, 3H), 2.94 (d,  $J = 5.1$  Hz, 2H).  $^{13}\text{C}$  NMR (151 MHz,  $\text{CDCl}_3$ )  $\delta$  171.39, 159.49, 132.92, 127.62, 124.99, 119.35 (q,  $J = 321.1$  Hz), 114.64, 97.27, 58.41, 55.52, 52.29, 39.53. HPLC chiralcel OJ column (10 % isopropanol in hexanes, 0.5 mL/min)  $t_r = 31.120$  min (major), 39.807 min (minor): 98 % ee. HRMS (ESI-TOF)  $m/z$  Calcd for  $\text{C}_{12}\text{H}_{13}\text{F}_3\text{INaO}_5\text{S}^+$   $[\text{MNa}]^+$  489.9403, found 489.9337.

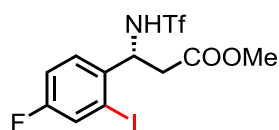

### 6e methyl 3-(4-fluoro-2-iodophenyl)-3-((trifluoromethyl)sulfonamido)propanoate

The compound **6e** was prepared according to the general procedure and was purified by prep-TLC to give a colorless oil in 41 % yield (39 mg). <sup>1</sup>H NMR (600 MHz, CDCl<sub>3</sub>) δ 7.58 (dd, *J* = 7.8, 2.6 Hz, 1H), 7.41 (dd, *J* = 8.8, 5.6 Hz, 1H), 7.12 (m, 1H), 5.21 (t, *J* = 4.9 Hz, 1H), 3.66 (s, 3H), 2.98 – 2.91 (m, 2H). <sup>13</sup>C NMR (151 MHz, CDCl<sub>3</sub>) δ 171.26, 161.54 (d, *J* = 253.6 Hz), 136.84 (d, *J* = 3.5 Hz), 128.27 (d, *J* = 8.2 Hz), 126.93 (d, *J* = 23.7 Hz), 119.31 (q, *J* = 320.7 Hz), 115.93 (d, *J* = 21.2 Hz), 96.49 (d, *J* = 8.2 Hz), 58.15, 52.39, 38.86. HPLC chiralcel OJ column (10 % isopropanol in hexanes, 0.3 mL/min) *t*<sub>r</sub> = 37.327 min (major), 44.560 min (minor): 98 % ee. HRMS (ESI-TOF) *m/z* Calcd for C<sub>11</sub>H<sub>10</sub>F<sub>4</sub>INaNO<sub>4</sub>S<sup>+</sup> [MNa]<sup>+</sup> 477.9204, found 477.9201.

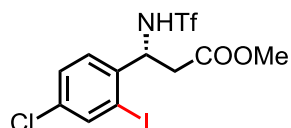

### 6f methyl 3-(4-chloro-2-iodophenyl)-3-((trifluoromethyl)sulfonamido)propanoate

The compound **6f** was prepared according to the general procedure and was purified by prep-TLC to give a colorless oil in 40 % yield (37 mg). <sup>1</sup>H NMR (500 MHz, CDCl<sub>3</sub>) δ 7.93 (d, *J* = 1.4 Hz, 1H), 7.53 – 7.43 (m, 2H), 7.24 (d, *J* = 9.1 Hz, 1H), 5.28 (dt, *J* = 9.1, 4.8 Hz, 1H), 3.75 (s, 3H), 3.11 – 3.00 (m, 2H). <sup>13</sup>C NMR (151 MHz, CDCl<sub>3</sub>) δ 171.21, 139.46, 139.26, 134.90, 129.00, 127.99, 119.29 (q, *J* = 320.7 Hz), 97.06, 58.34, 52.44, 38.79. HPLC chiralcel OJ column (10 % isopropanol in hexanes, 0.5 mL/min) *t*<sub>r</sub> = 19.533 min (major), 28.627 min (minor): 98 % ee. HRMS (ESI-TOF) *m/z* Calcd for C<sub>11</sub>H<sub>10</sub>ClF<sub>3</sub>INaNO<sub>4</sub>S<sup>+</sup> [MH]<sup>+</sup> 493.8908, found 493.8906.

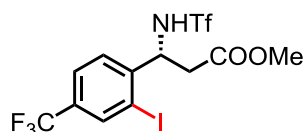

### 6g methyl 3-(4-trifluoromethyl-2-iodophenyl)-3-((trifluoromethyl)sulfonamido)propanoate

The compound **6g** was prepared according to the general procedure and was purified by prep-TLC to give a colorless oil in 38 % yield (40 mg). <sup>1</sup>H NMR (600 MHz, CDCl<sub>3</sub>) δ 8.14 – 8.08 (m, 1H), 7.66 (dd, *J* = 8.3, 1.7 Hz, 1H), 7.58 (d, *J* = 8.3 Hz, 1H), 5.30 – 5.23 (m, 1H), 3.68 (s, 3H), 3.04 – 2.95 (m, 2H). <sup>13</sup>C NMR (151 MHz, CDCl<sub>3</sub>) δ 171.10, 144.80, 136.89 (q, *J* = 3.6 Hz), 132.00 (q, *J* = 33.3 Hz), 127.72, 125.66 (q, *J* = 3.4 Hz), 122.5 (q, *J* = 272.9 Hz), 119.31 (q, *J* = 320.9 Hz), 96.79, 58.62, 52.51, 38.38. HPLC chiralcel OJ column (10 % isopropanol in hexanes, 0.2 mL/min) *t*<sub>r</sub> = 31.760 min (major), 40.273 min (minor): 99 % ee. HRMS (ESI-TOF) *m/z* Calcd for C<sub>11</sub>H<sub>10</sub>ClF<sub>3</sub>INaNO<sub>4</sub>S<sup>+</sup> [MH]<sup>+</sup> 505.9352, found 505.9355.

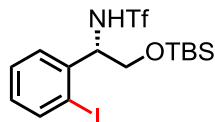

**9a-mono** *N*-(2-((*tert*-butyldimethylsilyloxy)-1-(2-iodophenyl)ethyl)-1,1,1-trifluoromethanesulfonamide

The compound **9a-mono** was prepared according to the general procedure and was purified by prep-TLC to give a colorless oil in 20 % yield (20 mg). <sup>1</sup>H NMR (600 MHz, CDCl<sub>3</sub>) δ 7.84 (d, *J* = 7.0 Hz, 1H), 7.38 (t, *J* = 7.5 Hz, 1H), 7.33 (d, *J* = 7.7 Hz, 1H), 7.02 (t, *J* = 7.6 Hz, 1H), 5.05 (dd, *J* = 4.5, 3.8 Hz, 1H), 3.95 (dd, *J* = 10.6, 3.8 Hz, 1H), 3.73 (dd, *J* = 10.6, 4.5 Hz, 1H), 0.84 (s, 9H), -0.06 (s, 3H), -0.09 (s, 3H). <sup>13</sup>C NMR (151 MHz, CDCl<sub>3</sub>) δ 139.77, 139.66, 129.89, 128.25, 128.14, 119.45 (q, *J* = 321.3 Hz), 97.39, 65.07, 63.28, 25.72, 18.24, -5.68, -5.79. The compound was deiodinated and then ee was determined. HPLC chiralcel AD-H column (5 % isopropanol in hexanes, 0.1 mL/min) *t*<sub>r</sub> = 37.320 min (minor), 40.260 min (major): 87 % ee. HRMS (ESI-TOF) *m/z* Calcd for C<sub>15</sub>H<sub>22</sub>F<sub>3</sub>INO<sub>3</sub>SSi<sup>+</sup> [M-H]<sup>+</sup> 508.0092, found 508.0091.

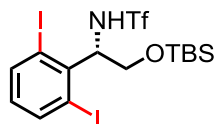

**9a-di** *N*-(2-((*tert*-butyldimethylsilyloxy)-1-(2,6-diiodophenyl)ethyl)-1,1,1-trifluoromethanesulfonamide

The compound **9a-di** was prepared according to the general procedure and was purified by prep-TLC to give a colorless oil in 20 % yield (25 mg). <sup>1</sup>H NMR (600 MHz, CDCl<sub>3</sub>) δ 7.93 (m, 2H), 6.65 (t, *J* = 7.8 Hz, 1H), 6.24 (br, 1H), 5.49 (t, *J* = 7.6 Hz, 1H), 4.09 – 4.01 (m, 1H), 3.94 – 3.87 (m, 1H), 0.89 (s, 9H), 0.12 (s, 3H), 0.06 (s, 3H). <sup>13</sup>C NMR (151 MHz, CDCl<sub>3</sub>) δ 142.51, 140.72, 138.24, 131.27, 119.33 (q, *J* = 321.7 Hz), 103.48, 92.85, 66.79, 62.04, 25.75, 18.22, -5.28, -5.31. HPLC chiralcel AD-H column (5 % isopropanol in hexanes, 0.1 mL/min) *t*<sub>r</sub> = 32.867 min (minor), 39.473 min (major): 99 % ee. HRMS (ESI-TOF) *m/z* Calcd for C<sub>15</sub>H<sub>21</sub>F<sub>3</sub>I<sub>2</sub>NO<sub>3</sub>SSi<sup>+</sup> [M-H]<sup>+</sup> 633.9058, found 633.9055.

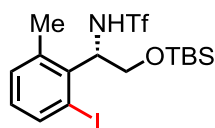

**9b**

*N*-(2-((*tert*-butyldimethylsilyloxy)-1-(2-methyl-6-iodophenyl)ethyl)-1,1,1-trifluoromethanesulfonamide

The compound **9b** was prepared according to the general procedure and was purified by prep-TLC to give a colorless oil in 49 % yield (51 mg). <sup>1</sup>H NMR (600 MHz, CDCl<sub>3</sub>) δ 7.75 (d, *J* = 7.8 Hz, 1H), 7.19 (d, *J* = 7.4 Hz, 0.7H), 7.14 (d, *J* = 7.4 Hz, 0.3H), 6.94 – 6.82 (m, 1H), 5.48 – 5.40 (m, 0.3H), 5.27 – 5.19 (m, 0.7H), 4.16 – 4.08 (m, 0.7H), 4.06 – 3.98 (m, 0.7H), 3.88 (dd, *J* = 10.9, 5.0 Hz, 0.3H), 3.81 (t, *J* = 9.7 Hz, 0.3H), 2.53 (s, 1H), 2.43 (s, 2H), 0.91 (s, 3H), 0.83 (s, 6H), 0.12 – 0.06 (m, 2H), 0.04 (s, 2H), -0.04 (s, 2H). <sup>13</sup>C NMR (151 MHz, CDCl<sub>3</sub>) δ 140.28,

139.90, 138.40, 137.62, 136.24, 135.98, 133.04, 131.12, 129.87, 129.70, 119.32 (q,  $J = 321.1$  Hz), 101.75, 93.97, 66.52, 63.10, 63.04, 56.92, 25.76, 25.67, 21.82, 20.98, 18.27, 18.11, -5.36, -5.43, -5.47, -5.51. The compound was deiodinated and the TBS ether was deprotected and then ee was determined. HPLC chiralcel AD-H column (10 % isopropanol in hexanes, 0.5 mL/min)  $t_r = 23.200$  min (minor), 30.947 min (major): 91 % ee. HRMS (ESI-TOF)  $m/z$  Calcd for  $C_{16}H_{24}F_3INO_3SSi^-$   $[M-H]^-$  522.0248, found 522.0248.

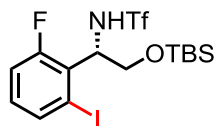

**9c** *N*-(2-((*tert*-butyldimethylsilyl)oxy)-1-(2-fluoro-6-iodophenyl)ethyl)-1,1,1-trifluoromethanesulfonamide

The compound **9c** was prepared according to the general procedure and was purified by prep-TLC to give a colorless oil in 41 % yield (43 mg).  $^1H$  NMR (600 MHz,  $CDCl_3$ )  $\delta$  7.71 – 7.65 (m, 1H), 7.13 – 7.05 (m, 1H), 7.05 – 6.98 (m, 1H), 5.87 (s, 1H), 5.19 (s, 1H), 3.87 (s, 2H), 0.85 (s, 9H), 0.03 – -0.09 (m, 6H).  $^{13}C$  NMR (151 MHz,  $CDCl_3$ )  $\delta$  160.54 (d,  $J = 250.4$  Hz), 136.02, 131.22 (d,  $J = 9.7$  Hz), 127.74 (d,  $J = 9.7$  Hz), 119.33 (d,  $J = 320.9$  Hz), 116.73 (d,  $J = 23.8$  Hz), 99.47, 64.27, 63.97, 25.66, 18.18, -5.59, -5.67. HPLC chiralcel AS-H column (5 % isopropanol in hexanes, 0.3 mL/min)  $t_r = 13.473$  min (major), 14.520 min (minor): 99 % ee. HRMS (ESI-TOF)  $m/z$  Calcd for  $C_{15}H_{23}F_4INO_3SSi^+$   $[MH]^+$  528.0143, found 428.0141.

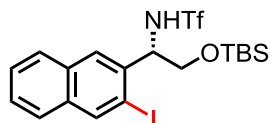

**9d**

*N*-(2-((*tert*-butyldimethylsilyl)oxy)-1-(3-iodonaphthalen-2-yl)ethyl)-1,1,1-trifluoromethanesulfonamide

The compound **9d** was prepared according to the general procedure and was purified by prep-TLC to give a colorless oil in 40 % yield (44 mg).  $^1H$  NMR (400 MHz,  $cdCl_3$ )  $\delta$  8.40 (s, 1H), 7.83 – 7.75 (m, 2H), 7.72 (d,  $J = 8.9$  Hz, 1H), 7.57 – 7.46 (m, 2H), 6.04 (s, 1H), 5.21 (ddd,  $J = 7.3, 4.1, 3.8$  Hz, 1H), 4.04 (dd,  $J = 10.7, 3.8$  Hz, 1H), 3.79 (dd,  $J = 10.7, 4.1$  Hz, 1H), 0.82 (s, 9H), -0.10 (s, 3H), -0.18 (s, 3H).  $^{13}C$  NMR (151 MHz,  $CDCl_3$ )  $\delta$  139.28, 135.74, 134.37, 132.36, 127.86, 127.32, 127.20, 127.18, 126.47, 119.51 (q,  $J = 321.4$  Hz), 94.13, 65.13, 63.02, 25.68, 18.20, -5.69, -5.80. HPLC chiralcel AS-H column (5 % isopropanol in hexanes, 0.1 mL/min)  $t_r = 48.873$  min (minor), 53.613 min (major): 96 % ee. HRMS (ESI-TOF)  $m/z$  Calcd for  $C_{19}H_{26}F_3INO_3SSi^+$   $[MH]^+$  560.0394, found 560.0398.

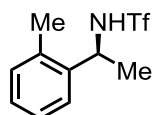

**2a**

HPLC chiralcel AS-H column (5 % isopropanol in hexanes, 0.5 mL/min)  $t_r$ = 11.200 min (minor), 30.613 min (major): 93 % ee.

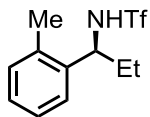**2b**

HPLC chiralcel AS-H column (5 % isopropanol in hexanes, 0.5 mL/min)  $t_r$ = 10.553 min (minor), 16.260 min (major): 89 % ee.

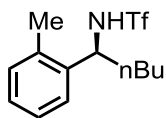**2c**

HPLC chiralcel AS-H column (5 % isopropanol in hexanes, 0.5 mL/min)  $t_r$ = 9.733 min (minor), 12.880 min (major): 77 % ee.

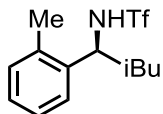**2d**

HPLC chiralcel AS-H column (5 % isopropanol in hexanes, 0.5 mL/min)  $t_r$ = 8.447 min (minor), 9.600 min (major): 83 % ee.

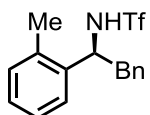**2e**

HPLC chiralcel AS-H column (5 % isopropanol in hexanes, 0.5 mL/min)  $t_r$ = 14.440 min (minor), 18.167 min (major): 67 % ee.

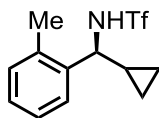**2f**

HPLC chiralcel AS-H column (5 % isopropanol in hexanes, 0.8 mL/min)  $t_r$ = 7.853 min (minor), 26.180 min (major): 77 % ee.

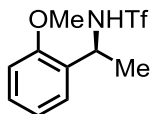



**2g**

HPLC chiralcel AS-H column (5 % isopropanol in hexanes, 0.8 mL/min)  $t_r$ = 9.687 min (minor), 32.247 min (major): 93 % ee.

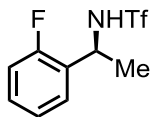**2h**

HPLC chiralcel AS-H column (5 % isopropanol in hexanes, 0.8 mL/min)  $t_r$ = 7.833 min (minor), 11.200 min (major): 89 % ee.

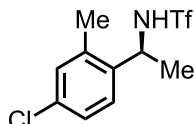**2i**

HPLC chiralcel AS-H column (5 % isopropanol in hexanes, 0.5 mL/min)  $t_r$ = 11.893 min (minor), 25.320 min (major): 91 % ee.

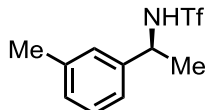**2j**

HPLC chiralcel AS-H column (5 % isopropanol in hexanes, 0.8 mL/min)  $t_r$ = 7.100 min (minor), 12.013 min (major): 78 % ee.

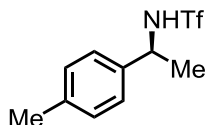**2k**

HPLC chiralcel AS-H column (10 % isopropanol in hexanes, 0.3 mL/min)  $t_r$ = 15.747 min (minor), 22.540 min (major): 78 % ee.

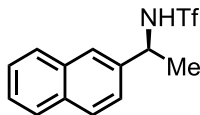**2l**

HPLC chiralcel AS-H column (5 % isopropanol in hexanes, 0.5 mL/min)  $t_r$ = 17.173 min (minor), 23.427 min (major): 67 % ee.

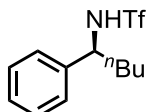

**2m**

HPLC chiralcel AS-H column (10 % isopropanol in hexanes, 0.5 mL/min)  $t_r$ = 9.827 min (minor), 10.853 min (major): 70 % ee.

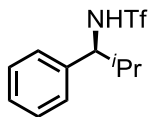**2n**

HPLC chiralcel AS-H column (10 % isopropanol in hexanes, 0.5 mL/min)  $t_r$ = 7.807 min (minor), 9.287 min (major): 45 % ee.

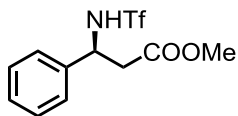**5a**

HPLC chiralcel OJ column (10 % isopropanol in hexanes, 0.3 mL/min)  $t_r$ = 45.227 min (minor), 50.520 min (major): 85 % ee.

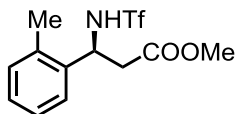**5b**

HPLC chiralcel AS-H column (10 % isopropanol in hexanes, 0.5 mL/min)  $t_r$ = 17.280 min (minor), 18.913 min (major): 93 % ee.

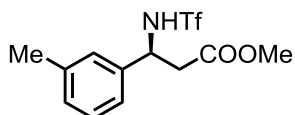**5c**

HPLC chiralcel OJ column (10 % isopropanol in hexanes, 0.5 mL/min)  $t_r$ = 16.933 min (major), 29.307 min (minor): 93 % ee.

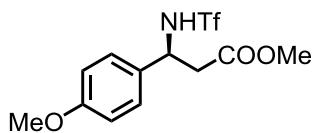**5d**

HPLC chiralcel OJ column (10 % isopropanol in hexanes, 0.5 mL/min)  $t_r$ = 42.313 min (minor), 53.093 min (major): 82 % ee.

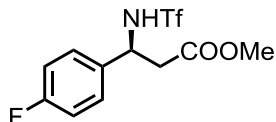

**5e**

HPLC chiralcel OJ column (10 % isopropanol in hexanes, 0.5 mL/min)  $t_r$ = 21.093 min (minor), 26.307 min (major): 90 % ee.

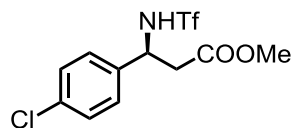**5f**

HPLC chiralcel OJ column (10 % isopropanol in hexanes, 0.5 mL/min)  $t_r$ = 21.947 min (minor), 27.620 min (major): 92 % ee.

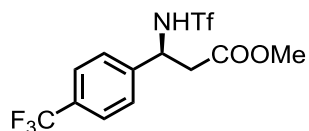**5g**

HPLC chiralcel OJ column (10 % isopropanol in hexanes, 0.5 mL/min)  $t_r$ = 14.347 min (major), 17.787 min (minor): 65 % ee.

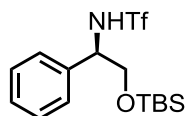**8a**

HPLC chiralcel AD-H column (5 % isopropanol in hexanes, 0.1 mL/min)  $t_r$ = 37.700 min (major), 40.687 min (minor): 71 % ee.

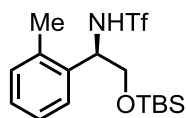**8b**

The TBS ether was deprotected and then ee was determined. HPLC chiralcel AS-H column (10 % isopropanol in hexanes, 0.3 mL/min)  $t_r$ = 20.167 min (minor), 23.213 min (major): 91 % ee.

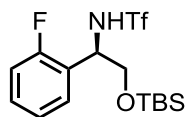**8c**

The TBS ether was deprotected and then ee was determined. HPLC chiralcel AS-H column (10 % isopropanol in hexanes, 0.2 mL/min)  $t_r$ = 39.120 min (major), 44.313 min (minor): 68 % ee.

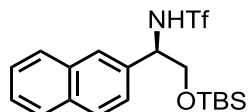

## 8d

HPLC chiralcel AS-H column (5 % isopropanol in hexanes, 0.2 mL/min)  $t_r$  = 21.167 min (major), 24.160 min (minor): 72 % ee.

### Deprotection of Trifluoromethanesulfonamides **3l** (**32**)

To a 20 mL round bottle was added **3l** (1 equiv. 0.5 mmol),  $K_2CO_3$  (2 equiv. 1.0 mmol), iodoacetonitrile (1.2 equiv. 0.6 mmol) and acetone (9mL). The mixture was stirred at room temperature for 12 h under nitrogen. Upon completion (monitored by TLC), the resulting solution was diluted by EtOAc, filtered and evaporated to afford the alkylated trifluoromethanesulfonamide, which could be used directly into the next step without purification.

To a 20 mL round bottle was added the alkylated trifluoromethanesulfonamide,  $Cs_2CO_3$  (3 equiv.) and anhydrous THF. The mixture was stirred at 40 °C overnight under nitrogen. Upon completion, the resulting solution was cooled to 0 °C, at which time aq. HCl (3 N) was added. The mixture was stirred for another 2 h at room temperature and cooled to 0 °C. 1N NaOH was added to reach pH = 14, and BzCl (1.5 equiv.) was dissolved in Dioxane and added dropwise during 30 min at 0 °C. The mixture was warmed to room temperature and stirred for another 12 h. Upon completion, the mixture was cooled to 0 °C and 1N HCl was added to reach pH = 1. The mixture was extracted with EtOAc (20 mL  $\times$  3) and the organic layer was washed with brine and dried over  $MgSO_4$ . The solvent was evaporated under reduced pressure and the mixture was purified by column chromatography on silica gel (EtOAc/hexane= 1:10 as eluant) afforded **10** as a white solid (103 mg, 72 % yield). And the ee was determined by converting the product back to the triflate amide (95 % ee).

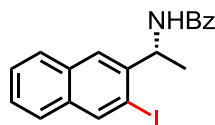

### **10** N-(1-((2-iodo)-naphthalen-2-yl)ethyl)benzamide

$^1H$  NMR (600 MHz,  $CDCl_3$ )  $\delta$  7.89 – 7.75 (m, 6H), 7.55 – 7.44 (m, 4H), 7.44 – 7.36 (m, 2H), 6.46 (d,  $J$  = 7.0 Hz, 1H), 5.56 – 5.44 (m, 1H), 1.69 (d,  $J$  = 6.9 Hz, 3H).

$^{13}C$  NMR (151 MHz,  $CDCl_3$ )  $\delta$  166.57, 140.44, 134.53, 133.32, 132.74, 131.47, 128.56, 128.54, 127.89, 127.59, 126.92, 126.23, 125.91, 124.77, 124.61, 49.25, 21.61.

## Synthetic Transformations of Iodinated Products

### Procedure for the preparation of compound **11**

To a 10 mL schlenk tube was added **3l** (1 equiv.),  $Pd(PPh_4)_4$  (0.05 equiv.),  $HCO_2Na$  (2 equiv.) and DMF. The mixture was stirred under nitrogen at 110 °C for 5 h. After completion, the mixture was filtrated through a pad

of celite, concentrated and purified by prep-TLC to obtain a white solid (96 % yield).

### Procedure for the preparation of compound 12

To a stirred solution of **3I** in THF was added  $i\text{PrMgCl}\cdot\text{LiCl}$  (1.1 equiv.) dropwise at  $0^\circ\text{C}$ . The mixture was stirred at this temperature for 3 h and was quenched with  $\text{D}_2\text{O}$ . The resulting solution was extracted with EtOAc (3 times) and the organic layer was dried over  $\text{MgSO}_4$ , concentrated and purified by prep-TLC to obtain a white solid (99 % yield).

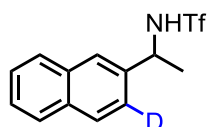

### 12 1,1,1-trifluoro-*N*-(1-(naphthalen-2-yl-3-d)ethyl)methanesulfonamide

$^1\text{H}$  NMR (600 MHz,  $\text{CDCl}_3$ )  $\delta$  7.91 – 7.80 (m, 3H), 7.75 (s, 1H), 7.56 – 7.47 (m, 2H), 5.28 (d,  $J = 7.9$  Hz, 1H), 5.01 – 4.92 (m, 1H), 1.72 (d,  $J = 6.9$  Hz, 3H).

$^{13}\text{C}$  NMR (151 MHz,  $\text{CDCl}_3$ )  $\delta$  138.05, 133.17, 133.01, 128.99, 128.02, 127.70, 126.66, 126.54, 124.79, 123.37 (t,  $J = 23.9$  Hz), 119.52 (q,  $J = 320.8$  Hz), 55.38, 23.37.

### Procedure for the preparation of compound 13(33)

To a 10 mL schlenk tube was added **3I** (0.1 mmol, 1 equiv.), 3-methoxyphenyl boronic acid (1.5 equiv.),  $\text{Pd}(\text{OAc})_2$  (0.025 equiv.), S-phos (0.05 equiv.),  $\text{K}_2\text{CO}_3$  (3 equiv.) and  $\text{CH}_3\text{CN}/\text{H}_2\text{O}$ . The mixture was stirred under  $\text{N}_2$  at  $100^\circ\text{C}$  for 12 h. After completion, the mixture was filtrated through a pad of celite, concentrated and purified by prep-TLC to obtain the product as a colorless oil (93 % yield).

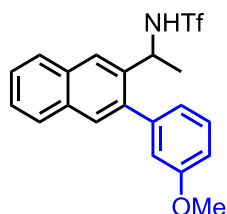

### 13 1,1,1-trifluoro-*N*-(1-(3-(3-methoxyphenyl)naphthalen-2-yl)ethyl)methanesulfonamide

$^1\text{H}$  NMR (600 MHz,  $\text{CDCl}_3$ )  $\delta$  7.89 – 7.83 (m, 2H), 7.83 – 7.79 (m, 1H), 7.71 (s, 1H), 7.54 – 7.48 (m, 2H), 7.39 (t,  $J = 7.9$  Hz, 1H), 7.02 – 6.90 (m, 3H), 5.39 (d,  $J = 7.9$  Hz, 1H), 5.19 – 5.11 (m, 1H), 3.85 (s, 3H), 1.47 (d,  $J = 6.8$  Hz, 3H).

$^{13}\text{C}$  NMR (151 MHz,  $\text{CDCl}_3$ )  $\delta$  159.52, 141.27, 138.29, 138.13, 132.69, 132.42, 129.59, 129.49, 127.63, 127.59, 126.79, 126.57, 124.19, 121.75, 119.40 (q,  $J = 321.2$  Hz), 114.70, 113.67, 55.28, 52.50, 24.96.

### Procedure for the preparation of compound 14 (34)

To a 10 mL schlenk tube was added **3I** (0.1 mmol, 1 equiv.),  $\text{CuCN}$  (2 equiv.), L-proline (2 equiv.) and DMF

(0.5 mL). The mixture was stirred under N<sub>2</sub> at 120 °C for 48 h. After completion, the mixture was filtrated through a pad of celite, concentrated and purified by prep-TLC to obtain the product as a colorless oil (67 % yield).

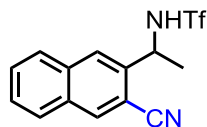

#### 14 N-(1-(3-cyanonaphthalen-2-yl)ethyl)-1,1,1-trifluoromethanesulfonamide

<sup>1</sup>H NMR (400 MHz, CDCl<sub>3</sub>) δ 8.30 (s, 1H), 7.94 – 7.81 (m, 3H), 7.73 – 7.56 (m, 2H), 6.04 (d, *J* = 6.9 Hz, 1H), 5.25 – 5.10 (m, 1H), 1.81 (d, *J* = 7.1 Hz, 3H).

<sup>13</sup>C NMR (151 MHz, CDCl<sub>3</sub>) δ 138.81, 136.63, 134.58, 131.54, 129.93, 128.18, 126.83, 119.39 (q, *J* = 321.3 Hz), 118.33, 106.82, 54.71, 23.27.

#### Procedure for the preparation of compound 15 (35)

To a 10 mL schlenk tube was added **3I** (0.1 mmol, 1 equiv.), CuI (0.2 equiv.), 1,10-phen (0.4 equiv.) Cs<sub>2</sub>CO<sub>3</sub> and MeOH (0.5 mL). The mixture was stirred under air at 110 °C for 24 h. After completion, the mixture was filtrated through a pad of celite, concentrated and purified by prep-TLC to obtain the product as a colorless oil (77 % yield).

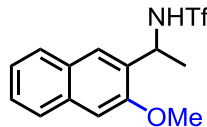

#### 15 1,1,1-trifluoro-N-(1-(3-methoxynaphthalen-2-yl)ethyl)ethanesulfonamide

<sup>1</sup>H NMR (600 MHz, CDCl<sub>3</sub>) δ 7.75 (t, *J* = 8.5 Hz, 2H), 7.61 (s, 1H), 7.47 (ddd, *J* = 8.1, 7.0, 1.2 Hz, 1H), 7.38 (ddd, *J* = 8.1, 7.0, 1.1 Hz, 1H), 7.26 (s, 1H), 6.14 (d, *J* = 9.4 Hz, 1H), 4.98 – 4.87 (m, 1H), 4.02 (s, 3H), 1.69 (d, *J* = 7.0 Hz, 3H).

<sup>13</sup>C NMR (151 MHz, CDCl<sub>3</sub>) δ 154.90, 133.97, 129.82, 128.51, 127.71, 127.44, 126.93, 126.45, 124.53, 119.48 (q, *J* = 321.0 Hz), 106.69, 55.53, 23.21.

#### Procedure for the preparation of compound 16

To a stirred solution of **3I** in THF was added iPrMgCl-LiCl (1.1 equiv.) dropwise at 0 °C. The mixture was stirred at this temperature for 3 h and PhCHO was added. The resulting solution was warmed to room temperature slowly and stirred for another 2 h. After completion, the mixture was quenched with aq. NH<sub>4</sub>Cl, extracted with EtOAc (3 times) and the organic layer was dried over MgSO<sub>4</sub>, concentrated and purified by prep-TLC to obtain a white solid (98 % yield).

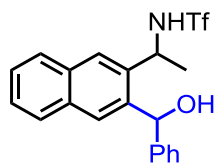

**16 1,1,1-trifluoro-*N*-(1-(3-(hydroxy(phenyl)methyl)naphthalen-2-yl)ethyl)methanesulfonamide**

$^1\text{H}$  NMR (600 MHz,  $\text{CDCl}_3$ )  $\delta$  7.85 – 7.78 (m, 2H), 7.74 (d,  $J = 7.8$  Hz, 1H), 7.58 (s, 1H), 7.53 – 7.45 (m, 2H), 7.43 – 7.36 (m, 4H), 7.37 – 7.30 (m, 1H), 6.27 (s, 1H), 5.96 (s, 1H), 5.42 – 5.32 (m, 1H), 2.64 (s, 1H), 1.49 (d,  $J = 6.8$  Hz, 3H).

$^{13}\text{C}$  NMR (151 MHz,  $\text{CDCl}_3$ )  $\delta$  142.04, 138.92, 137.25, 132.97, 132.40, 128.86, 128.65, 127.94, 127.86, 127.40, 126.93, 126.76, 126.56, 126.53, 119.45 (q,  $J = 321.3$  Hz), 74.45, 52.30, 24.08.

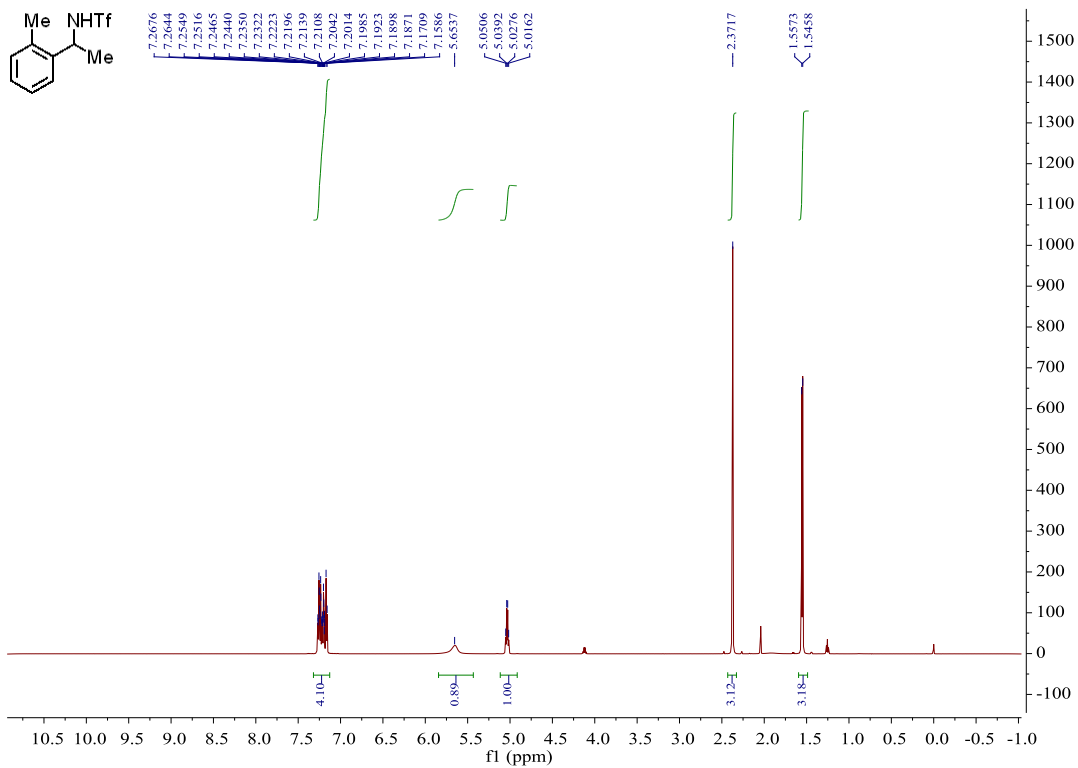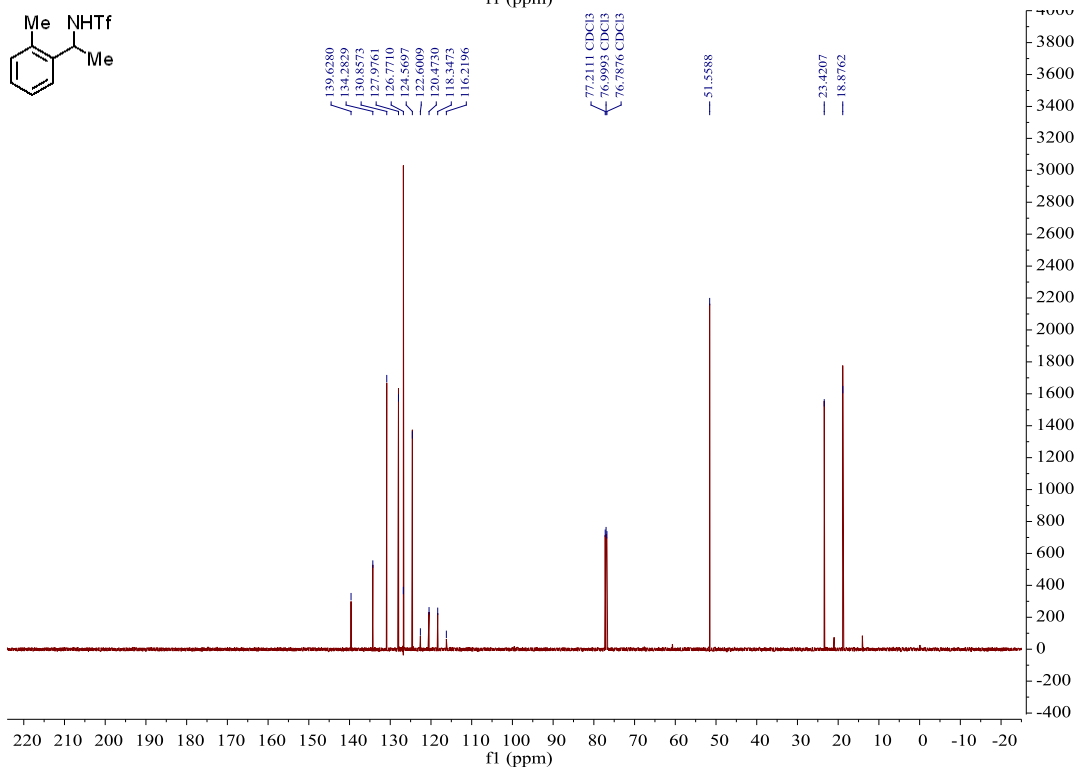



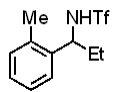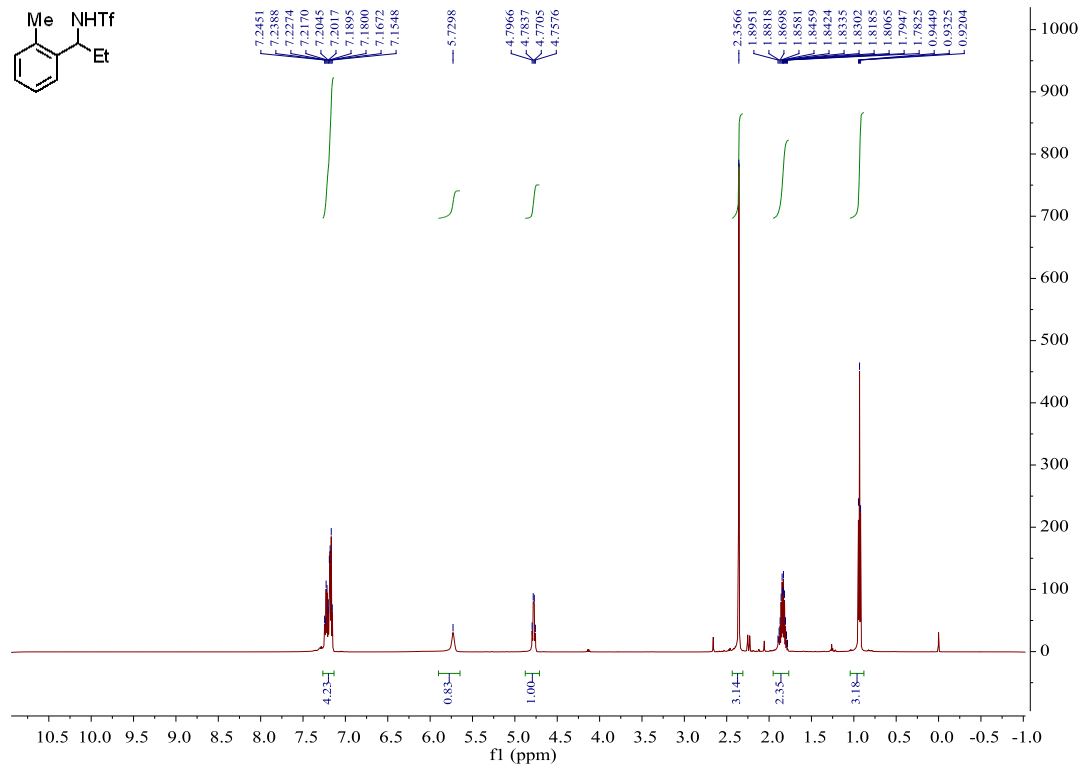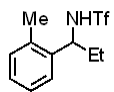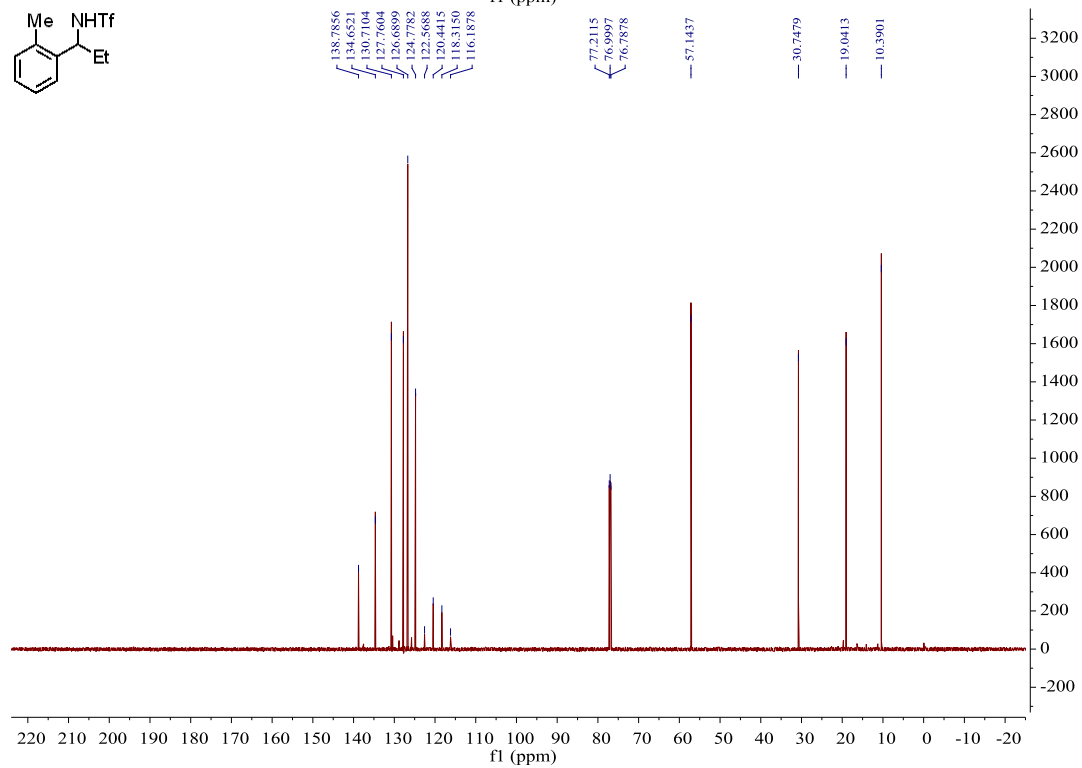

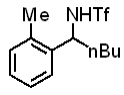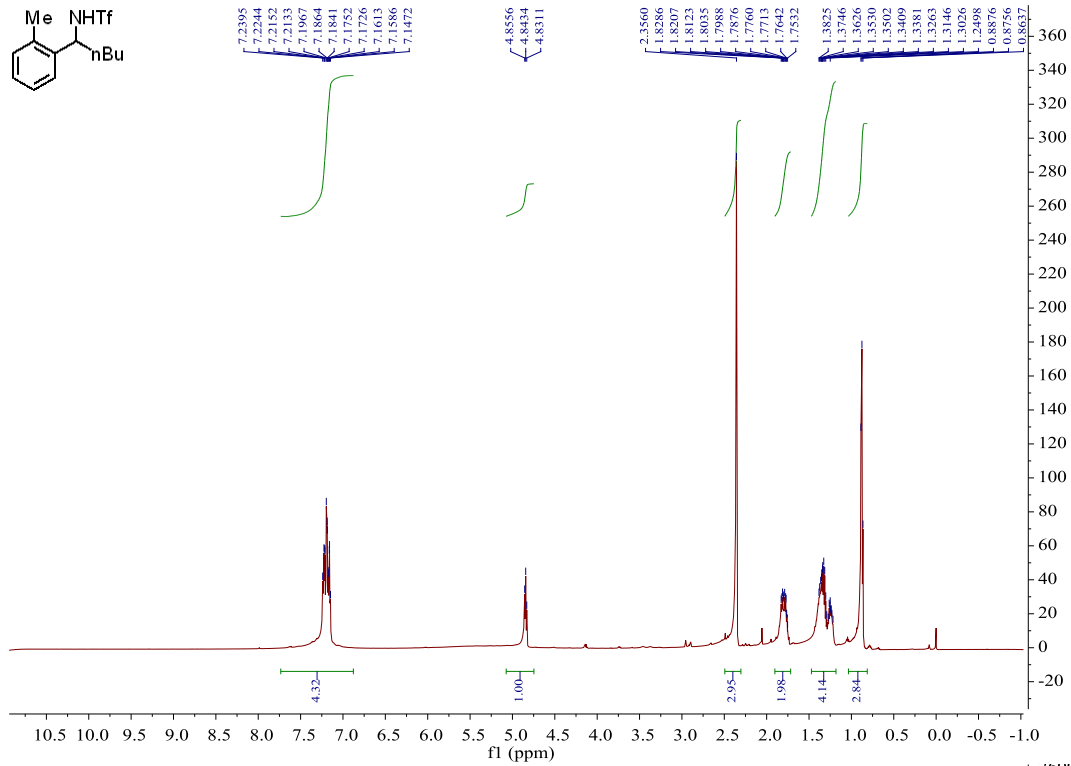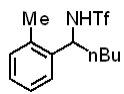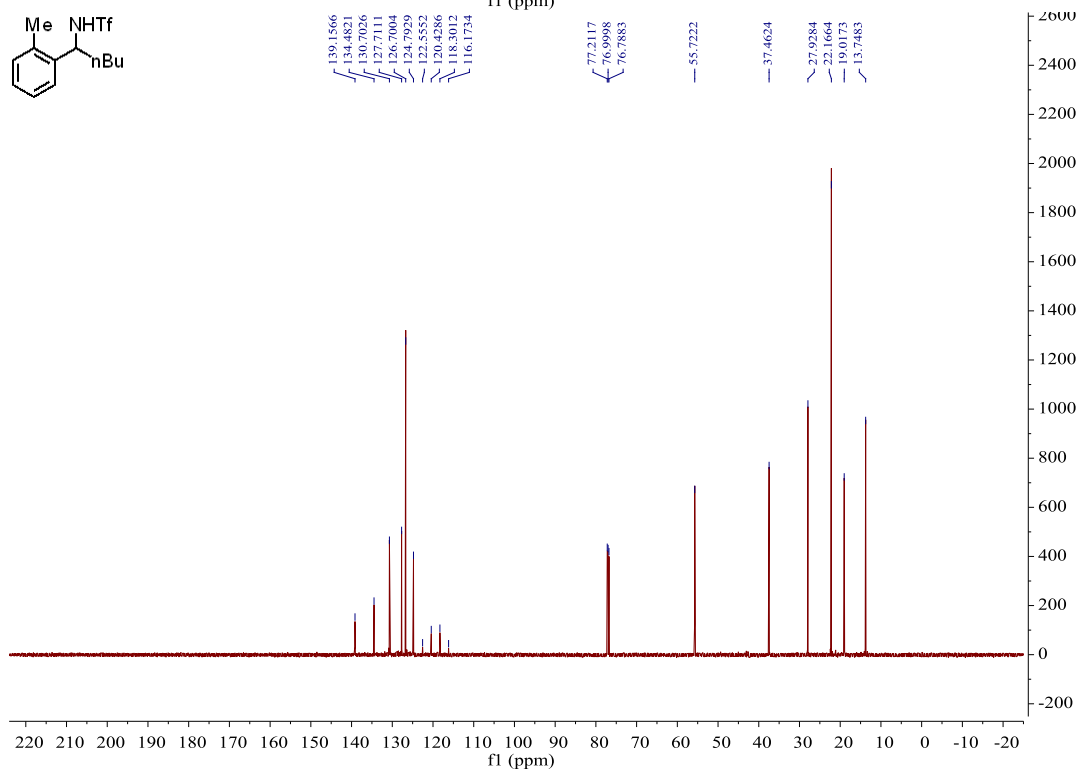

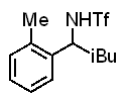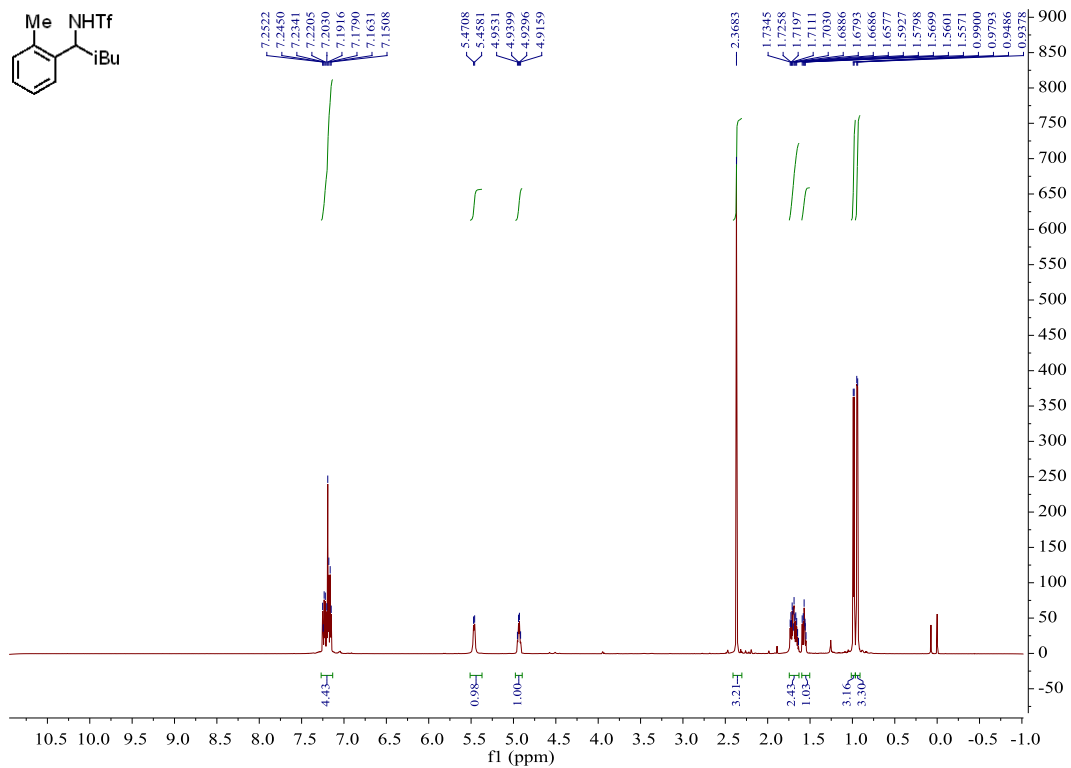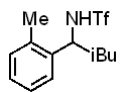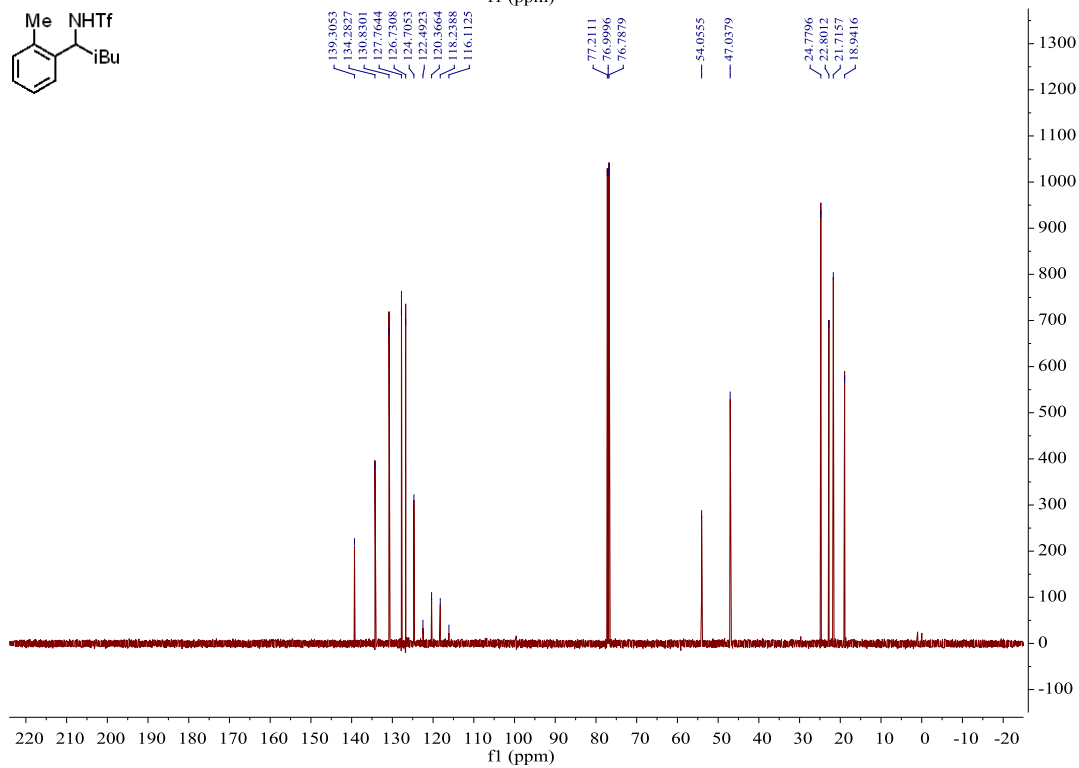

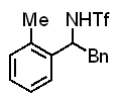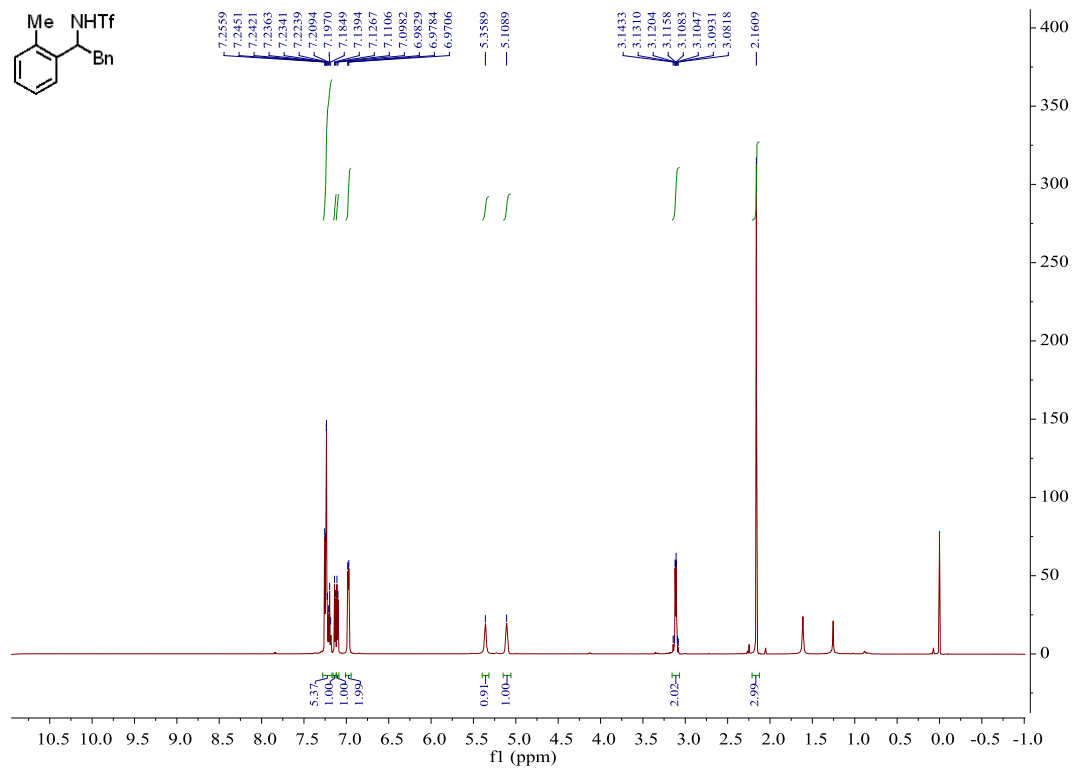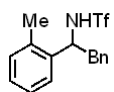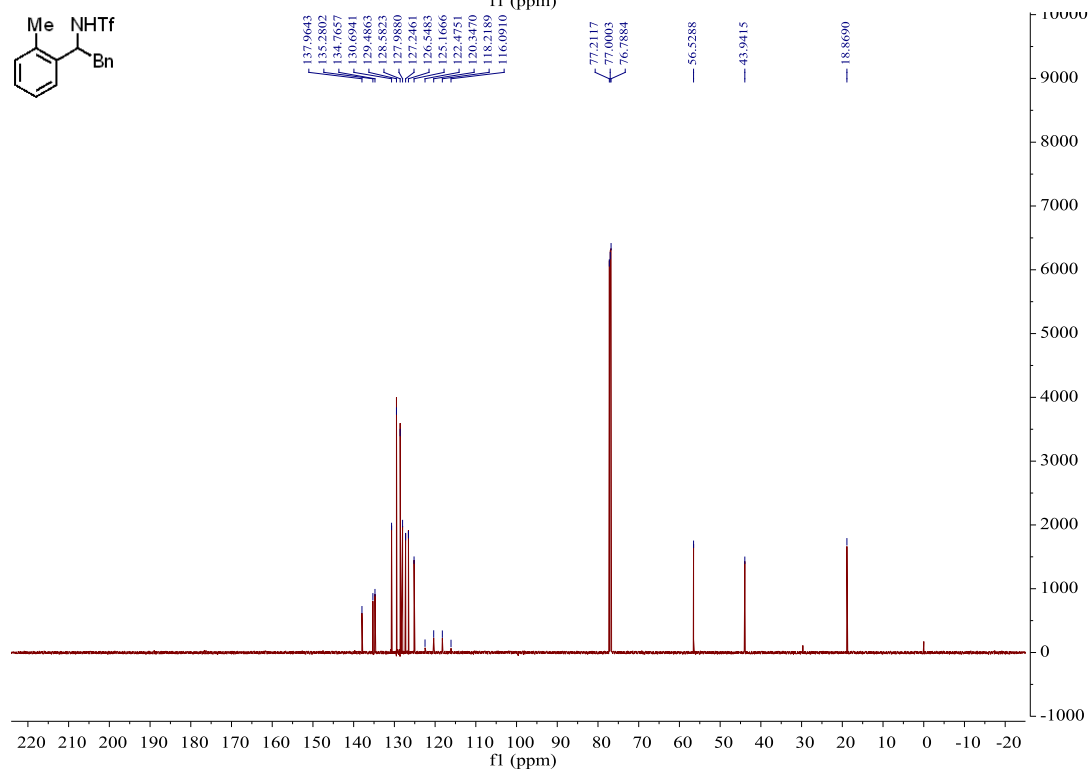

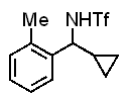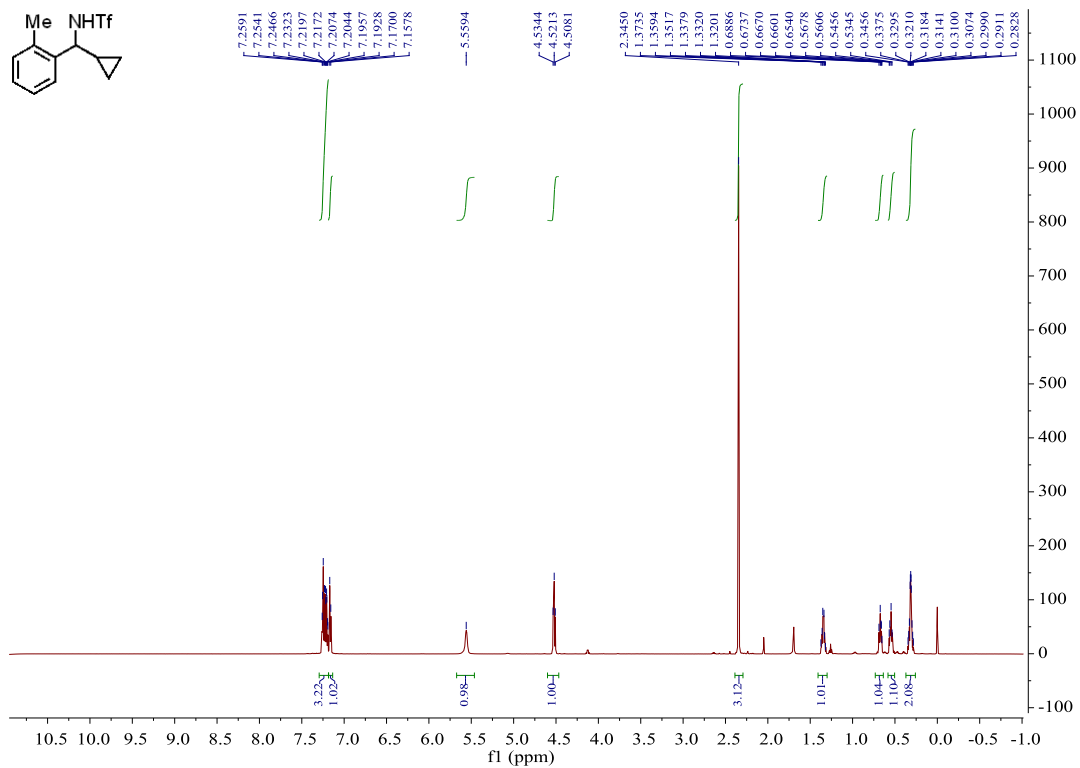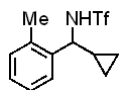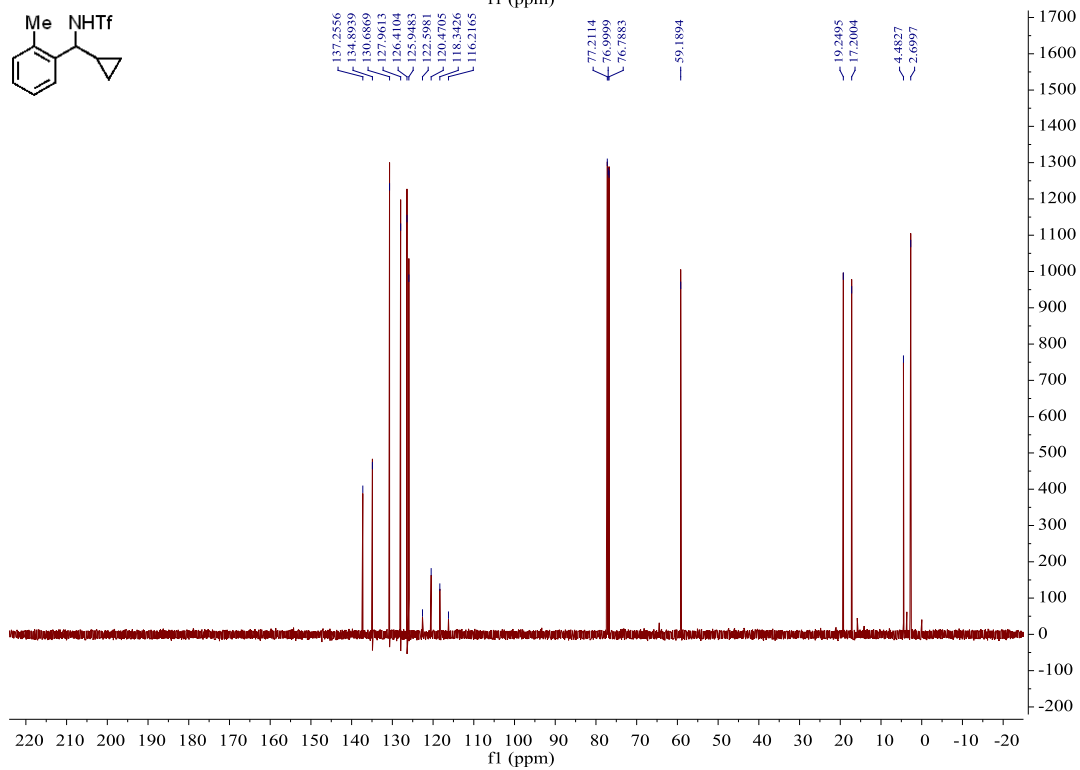

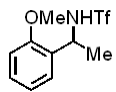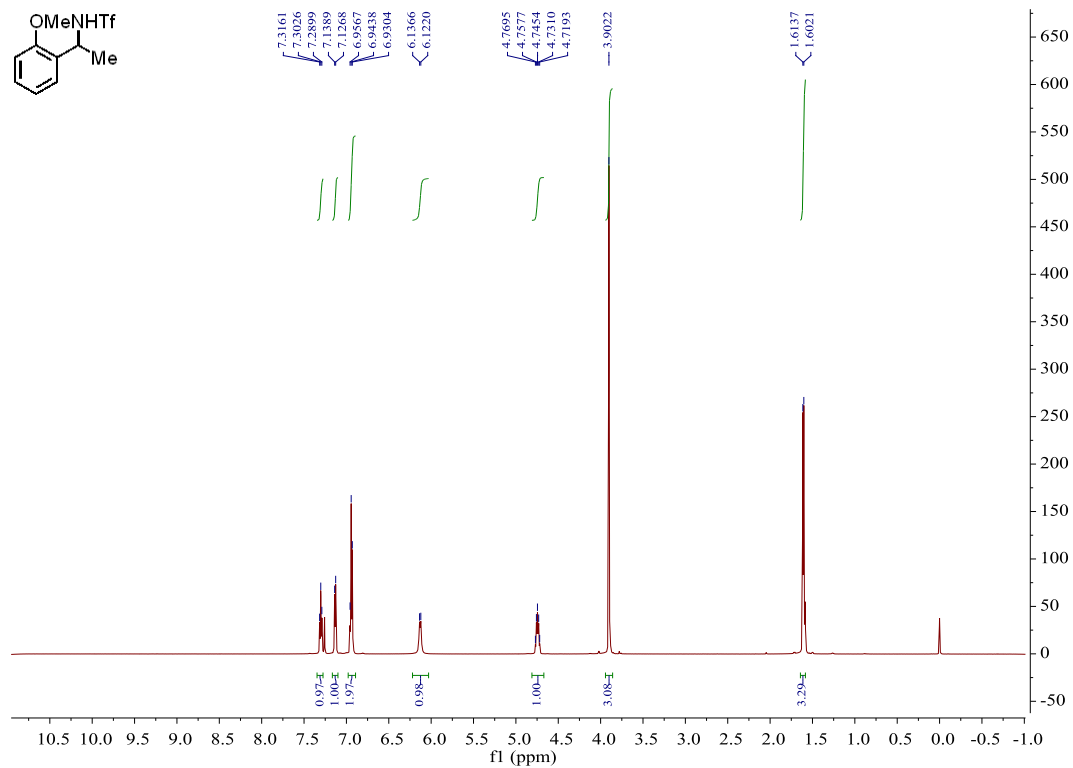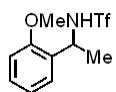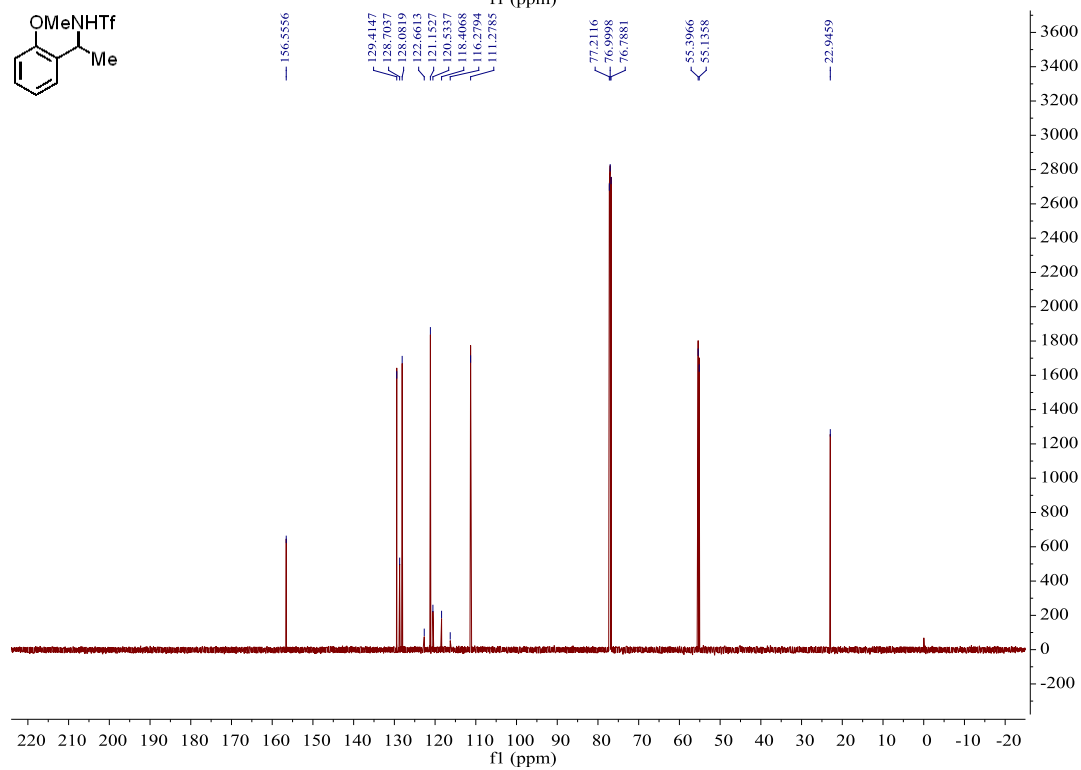

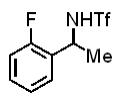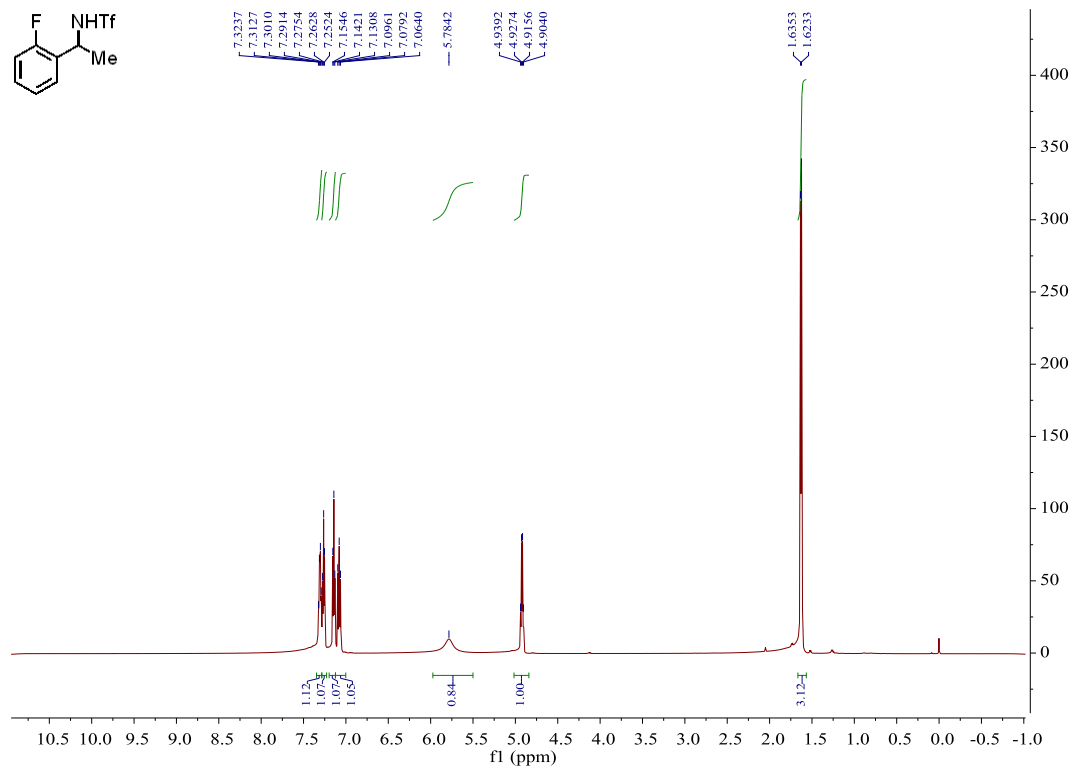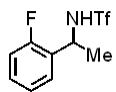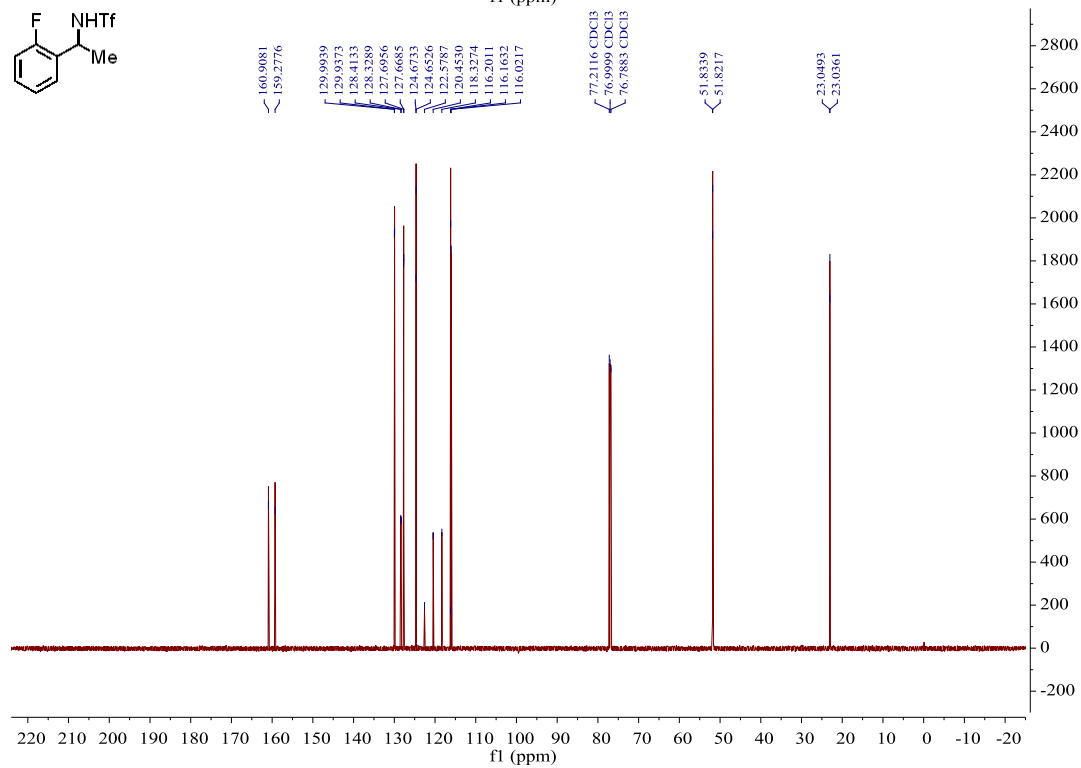

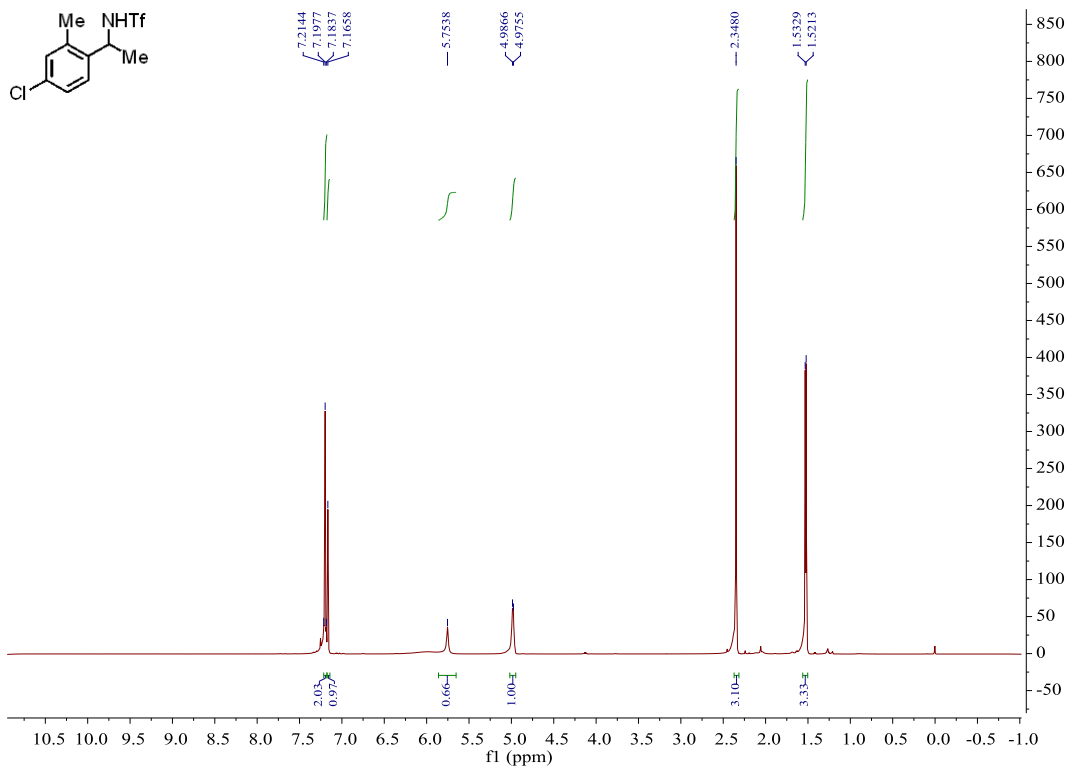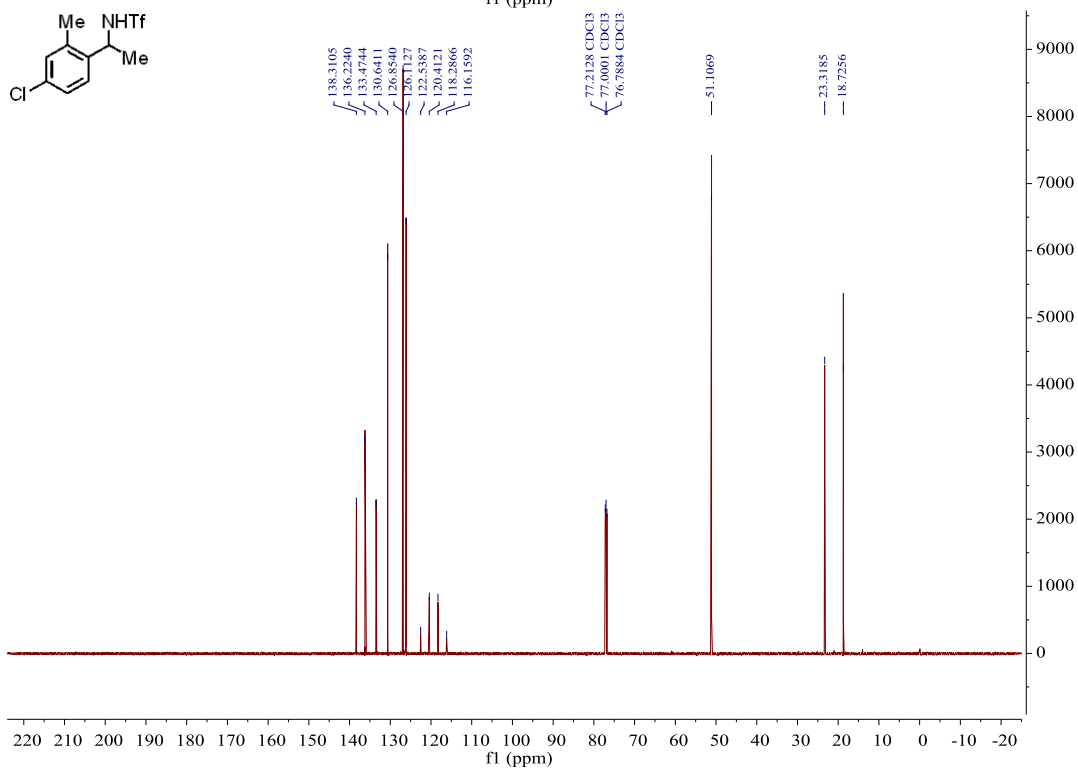



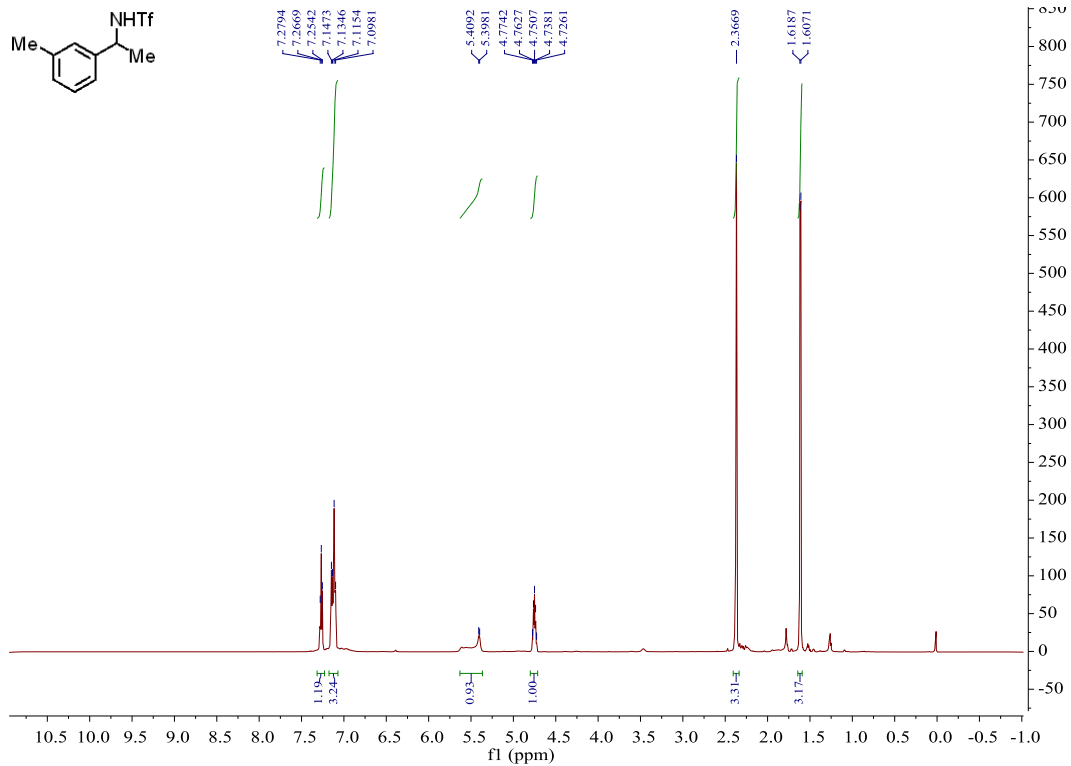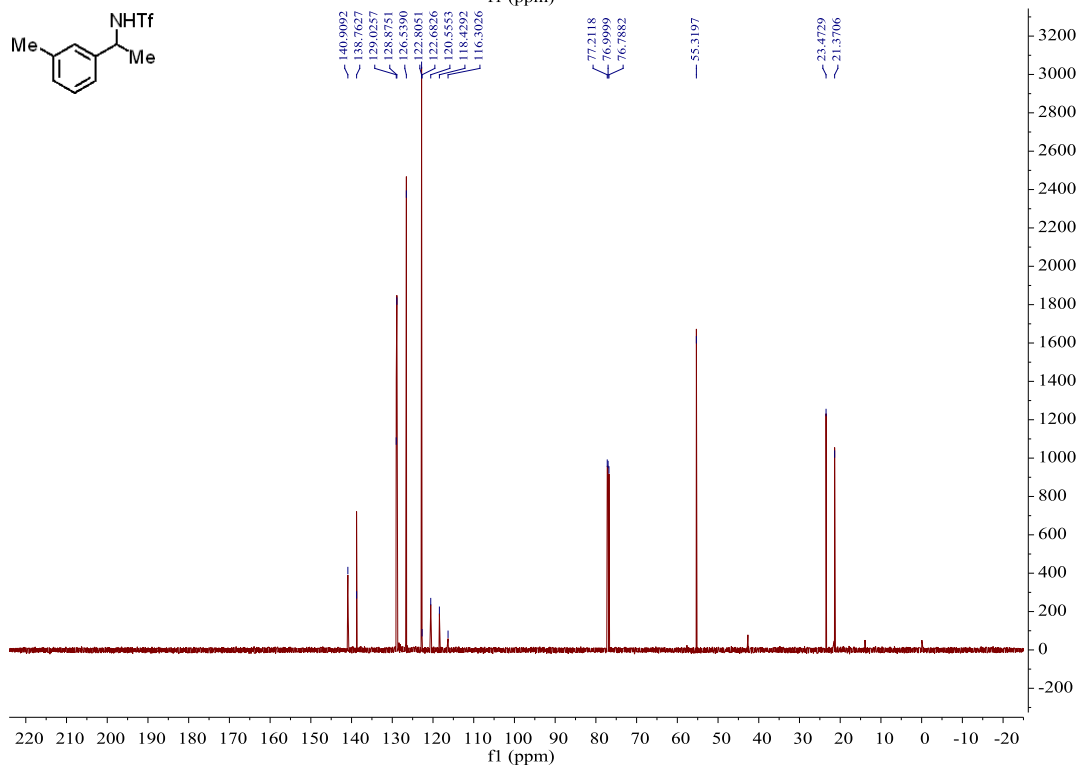

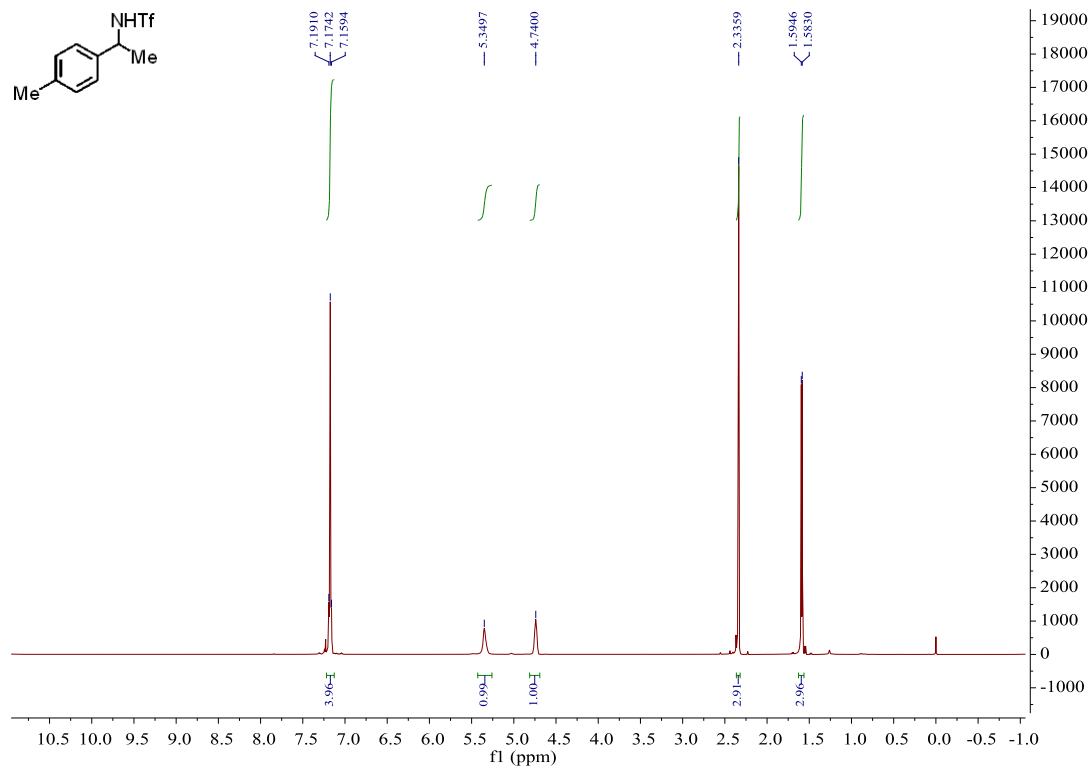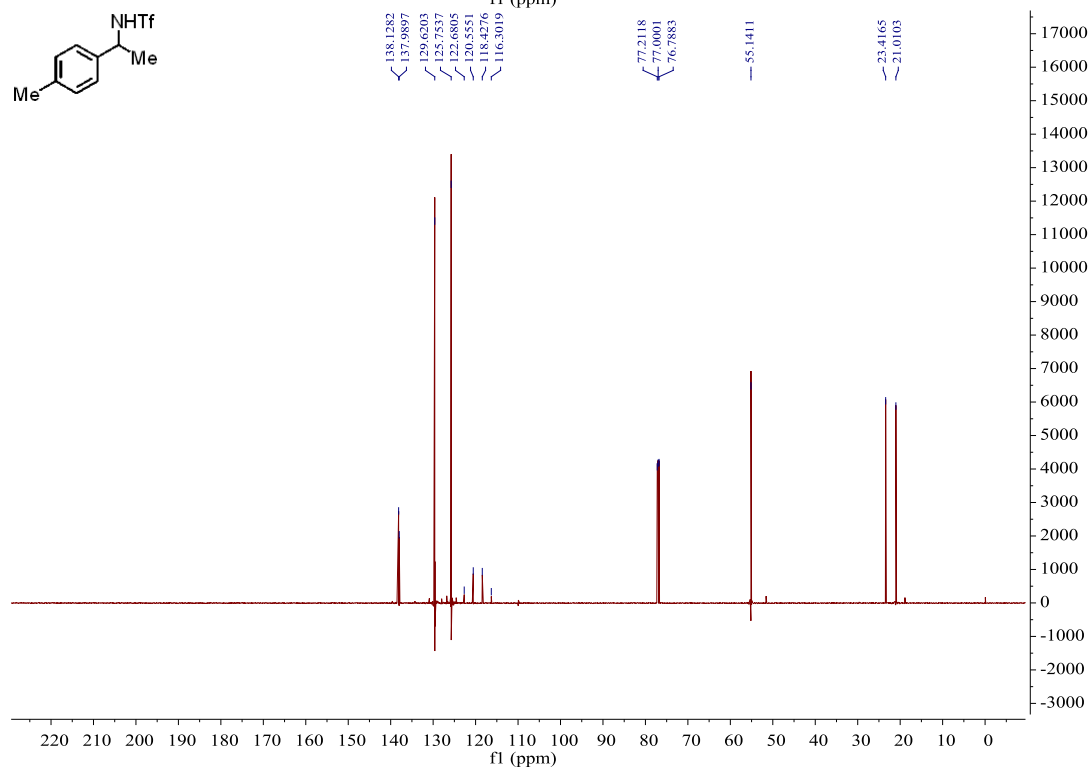

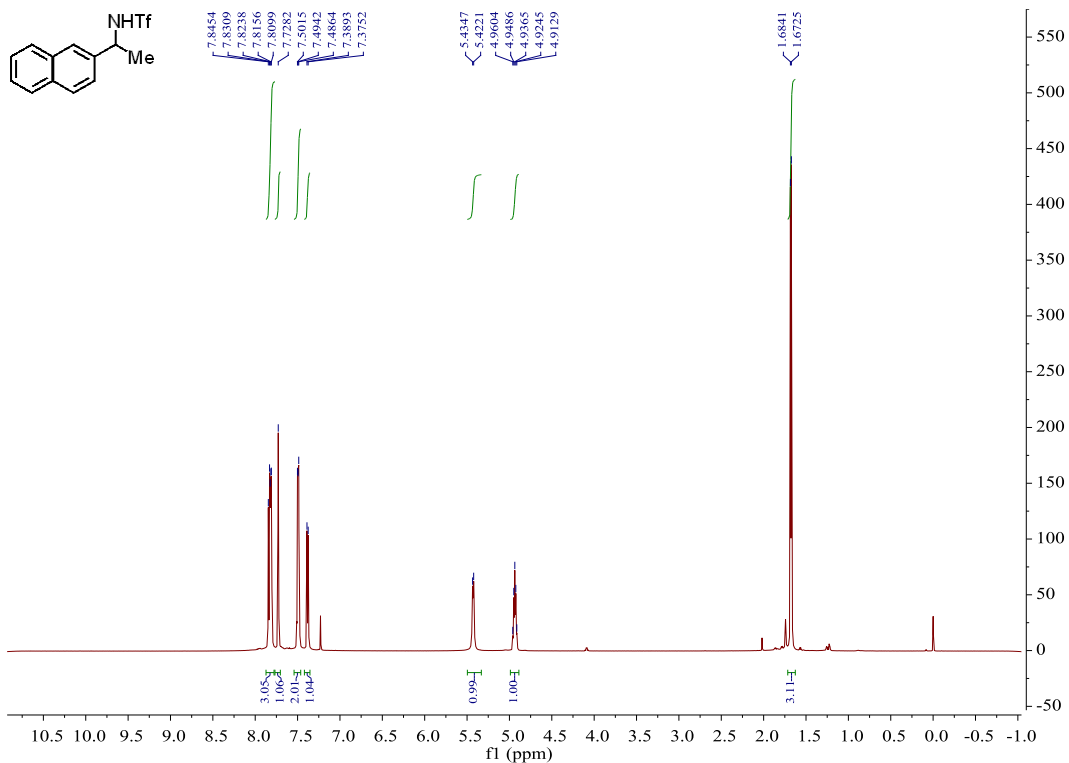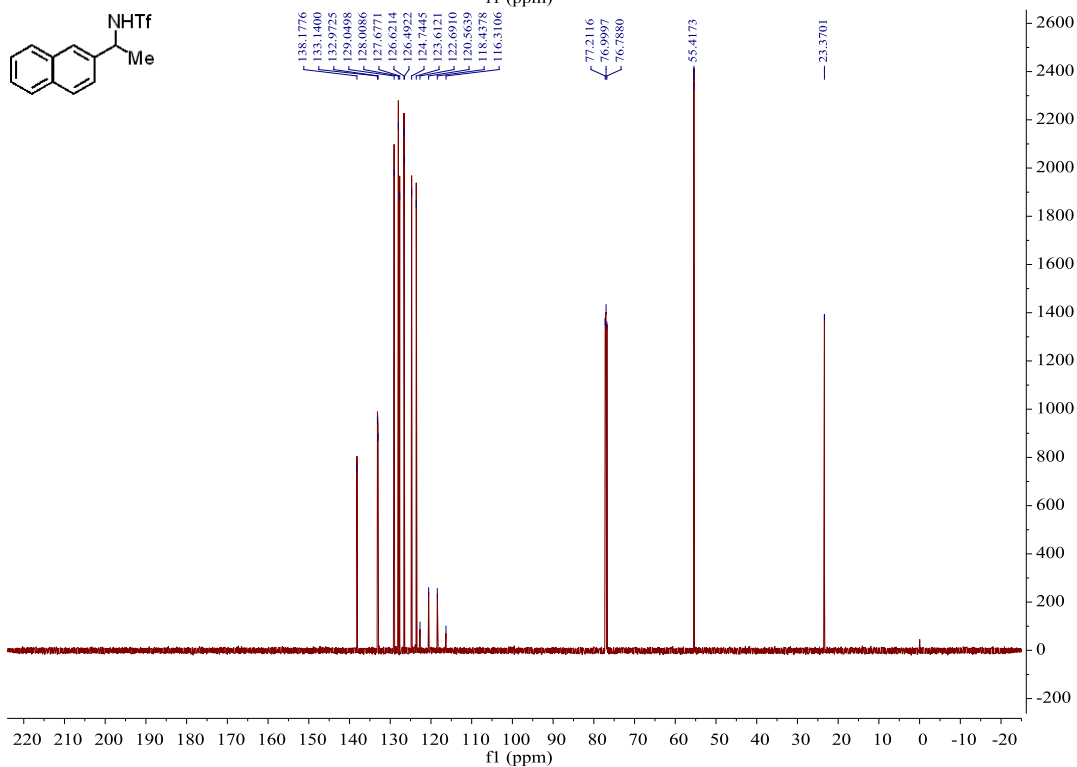

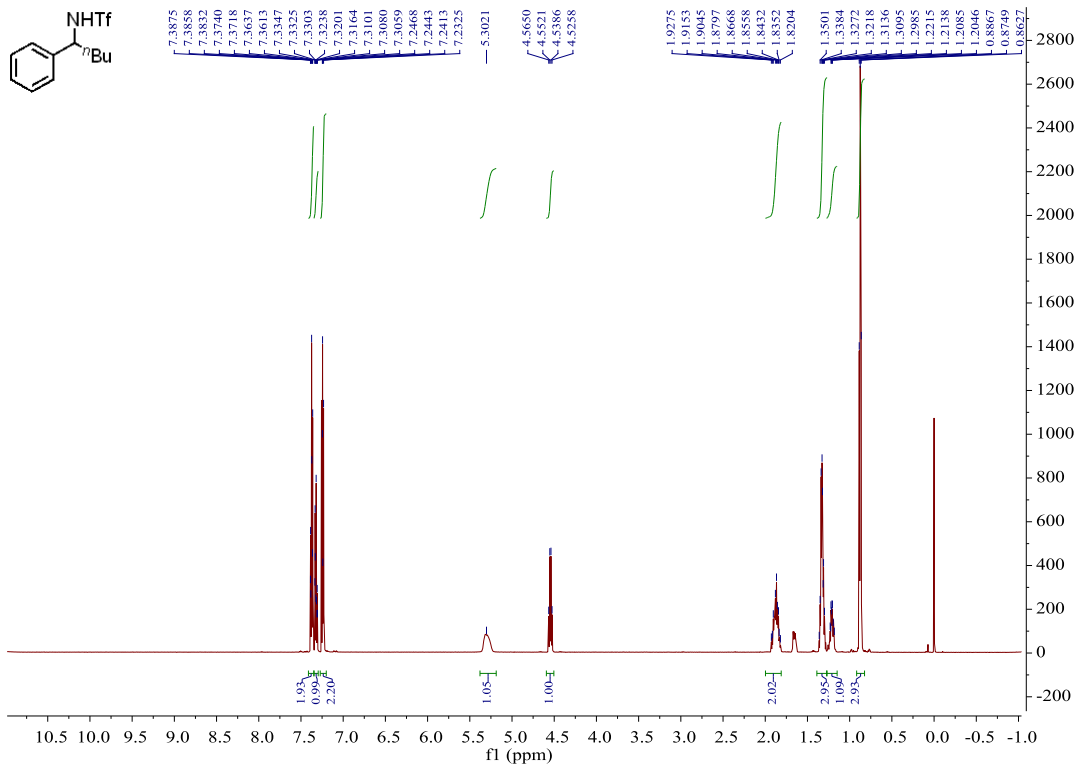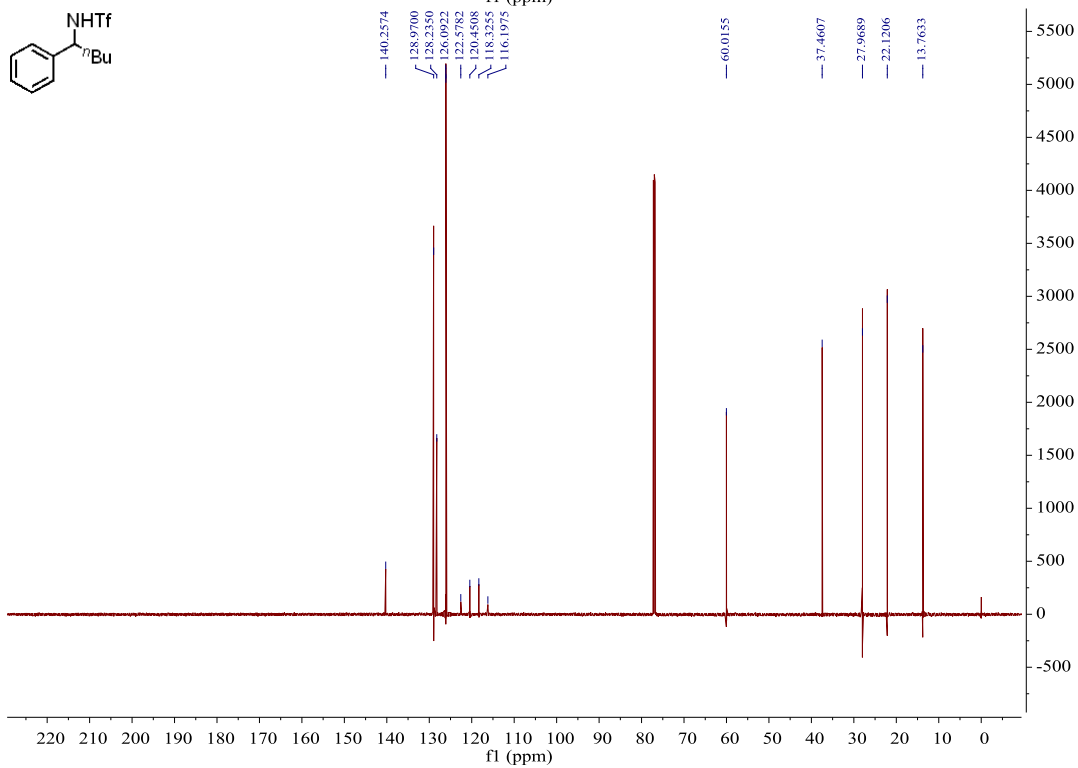

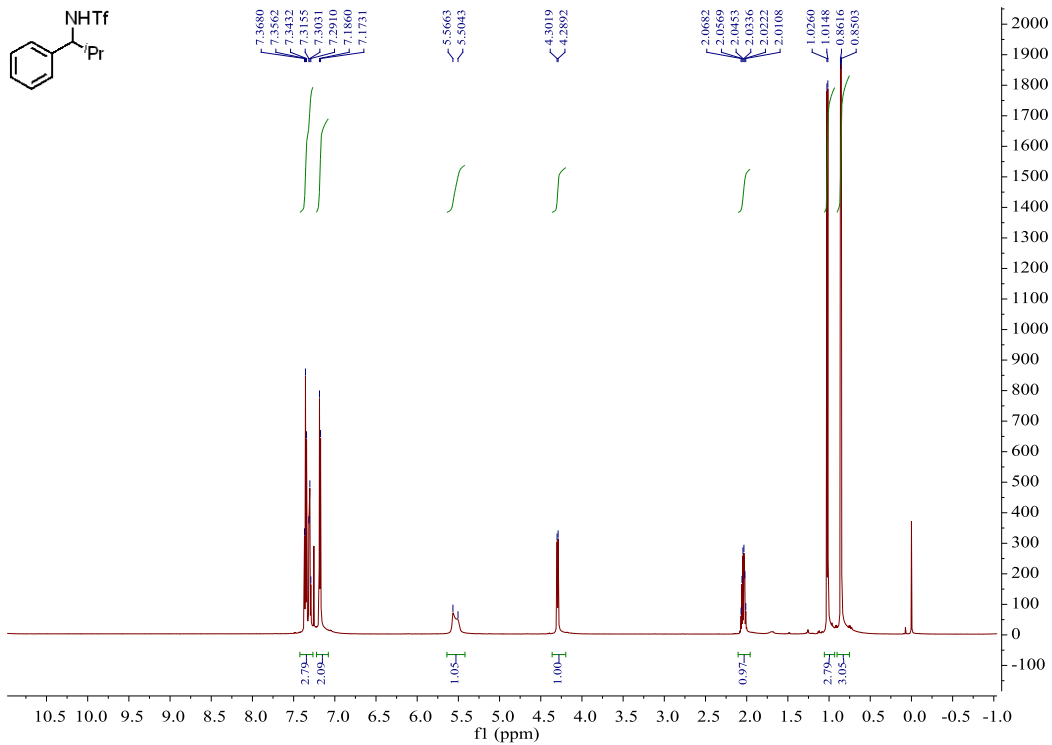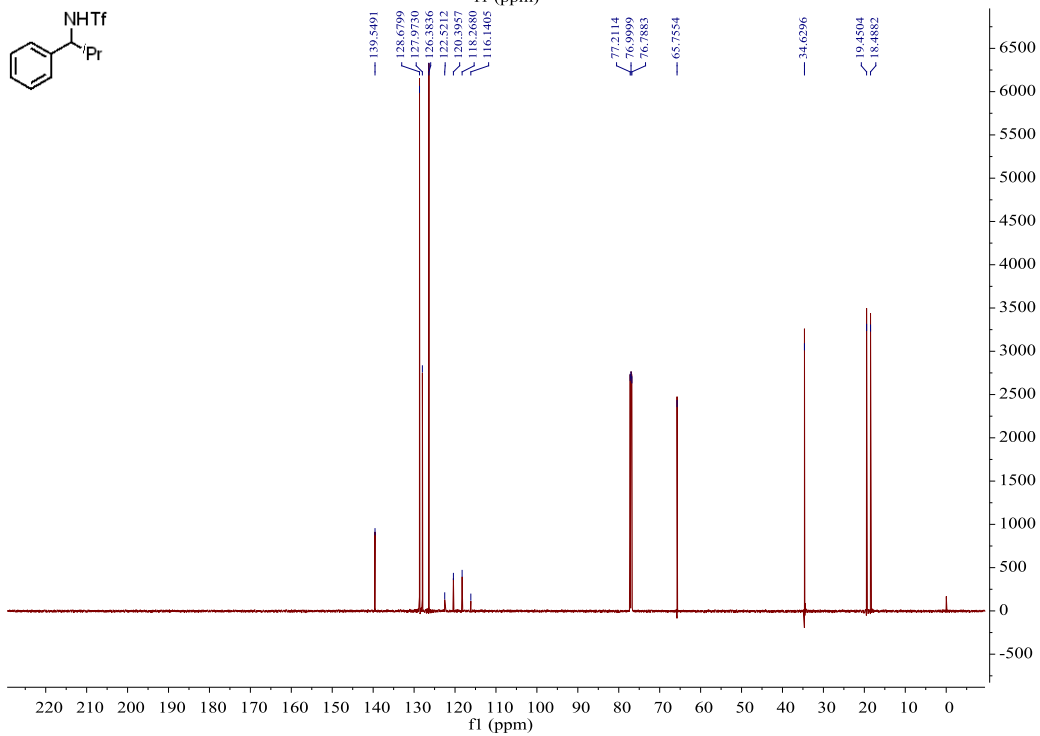

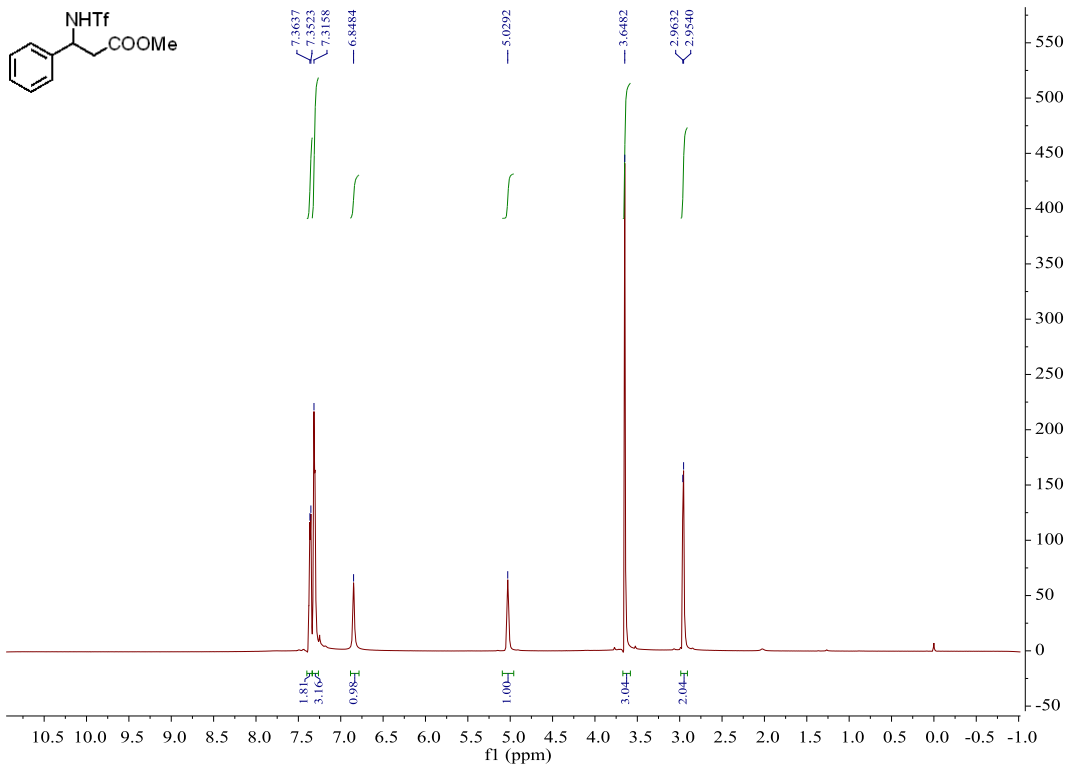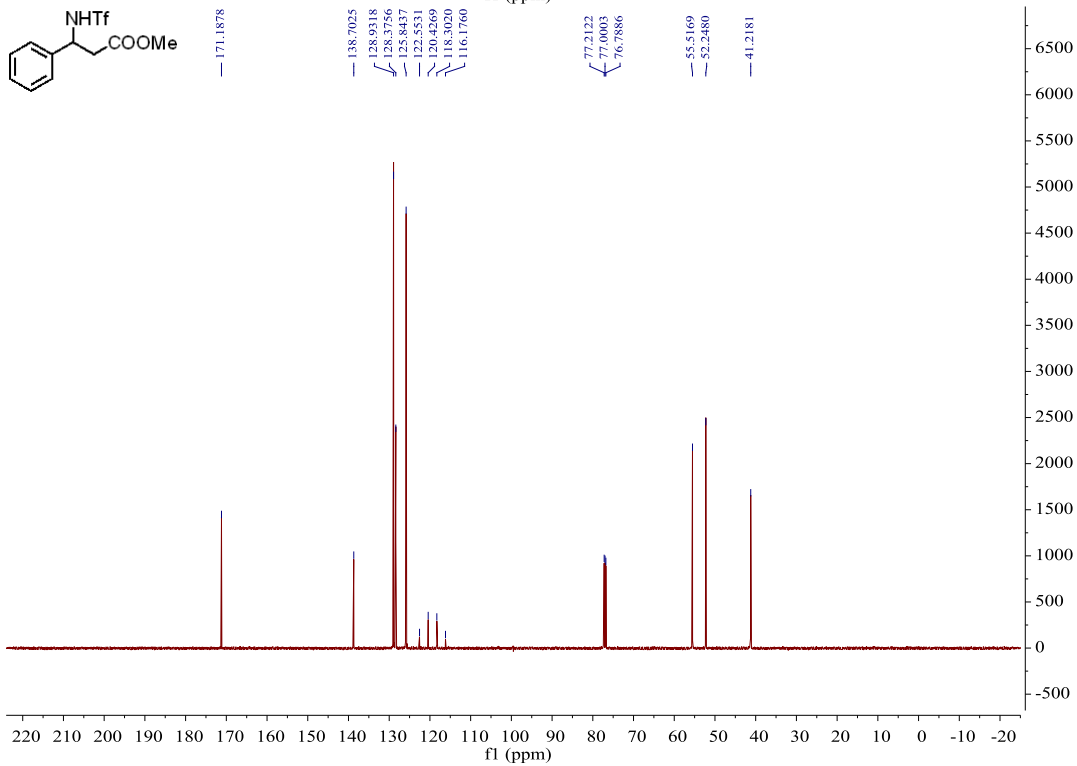

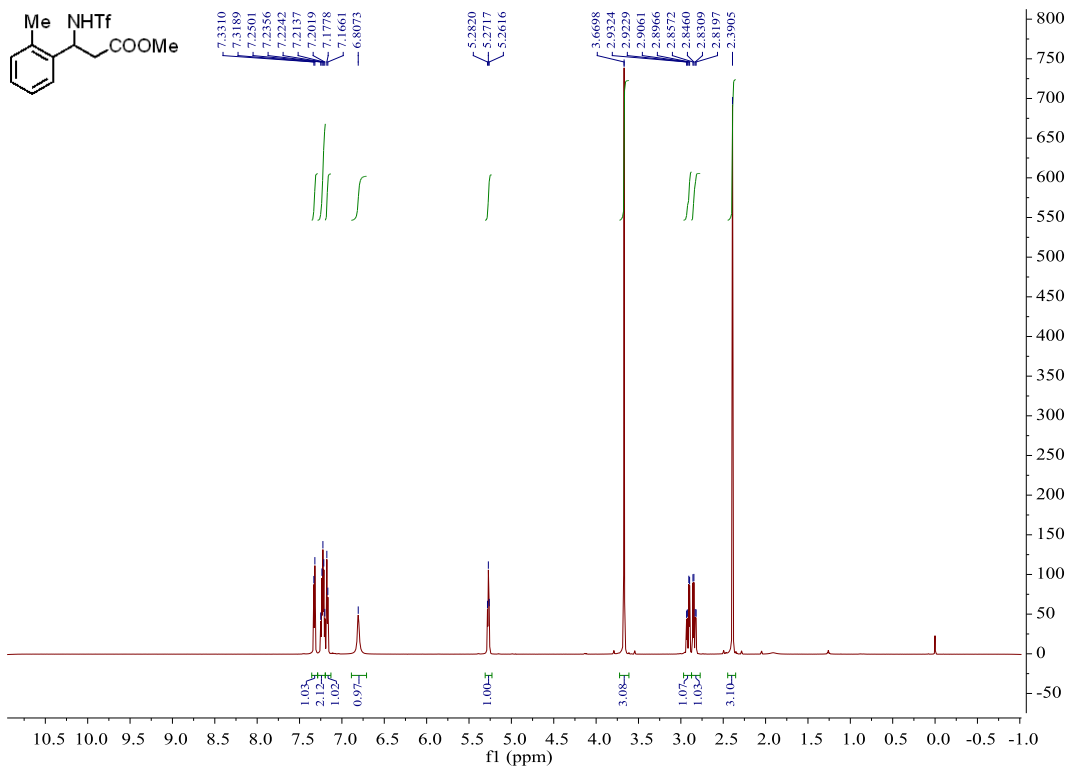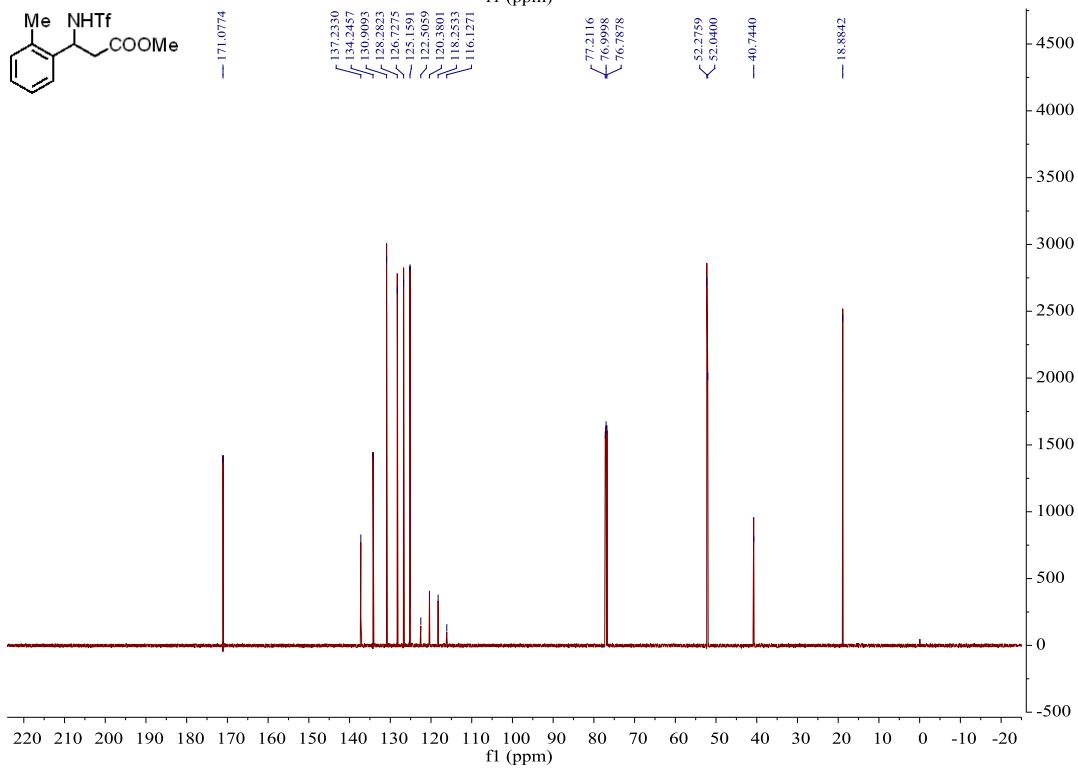

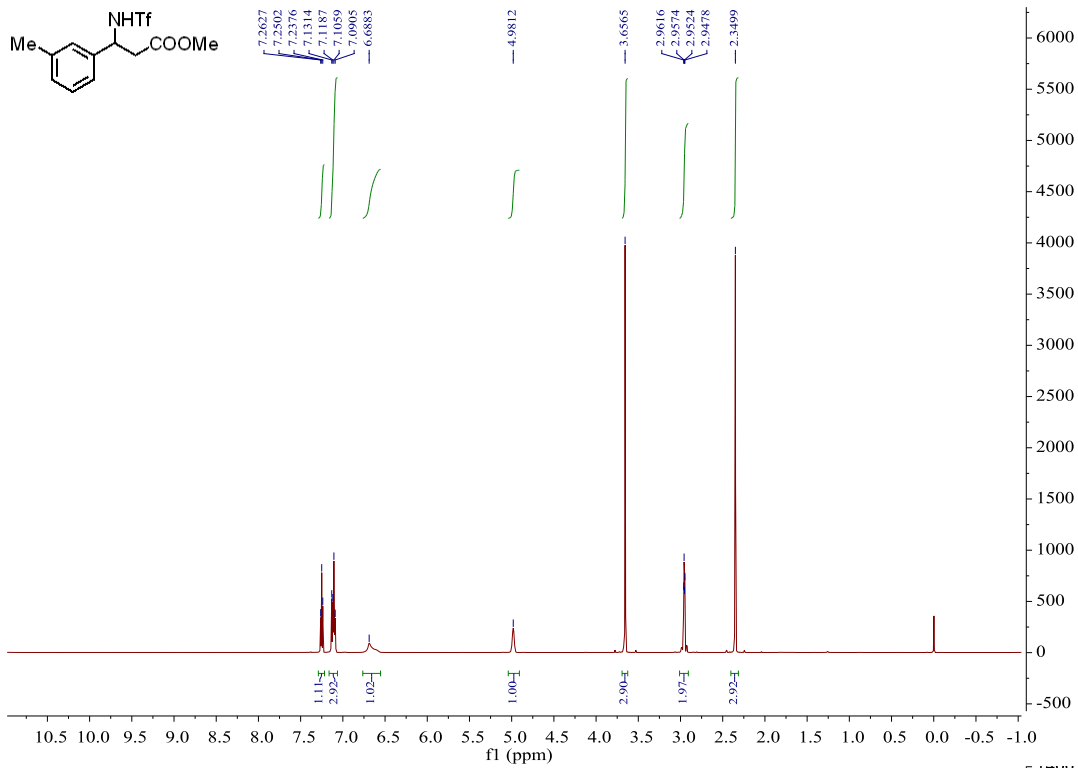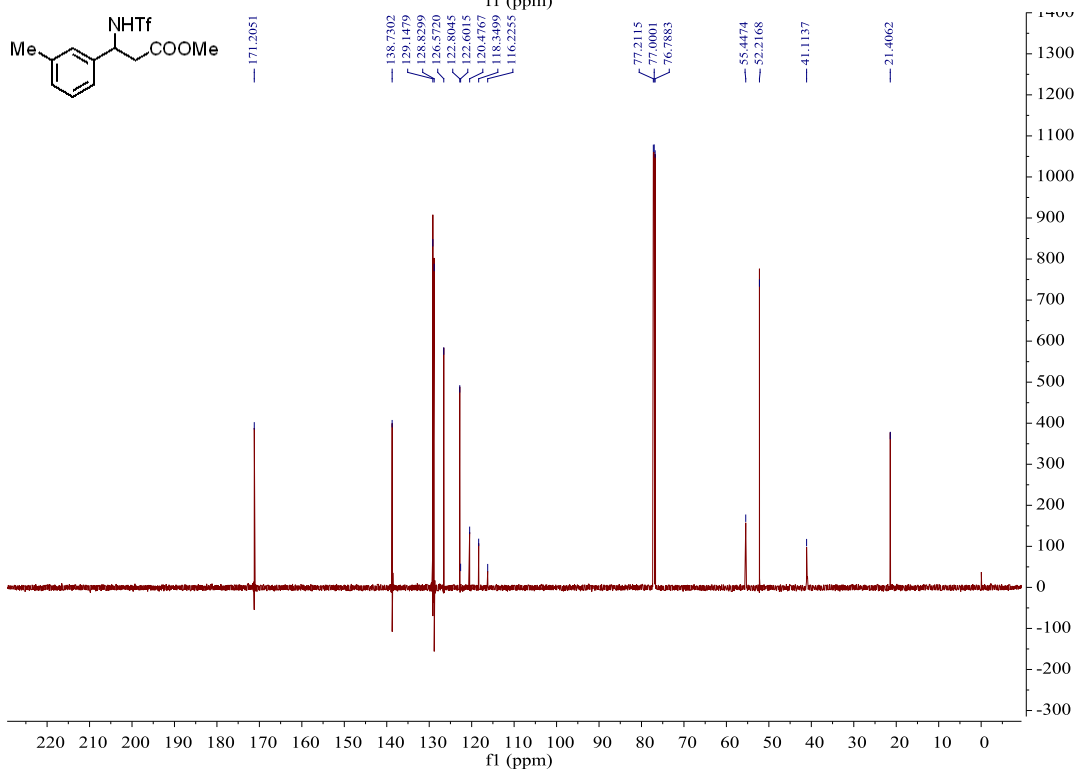



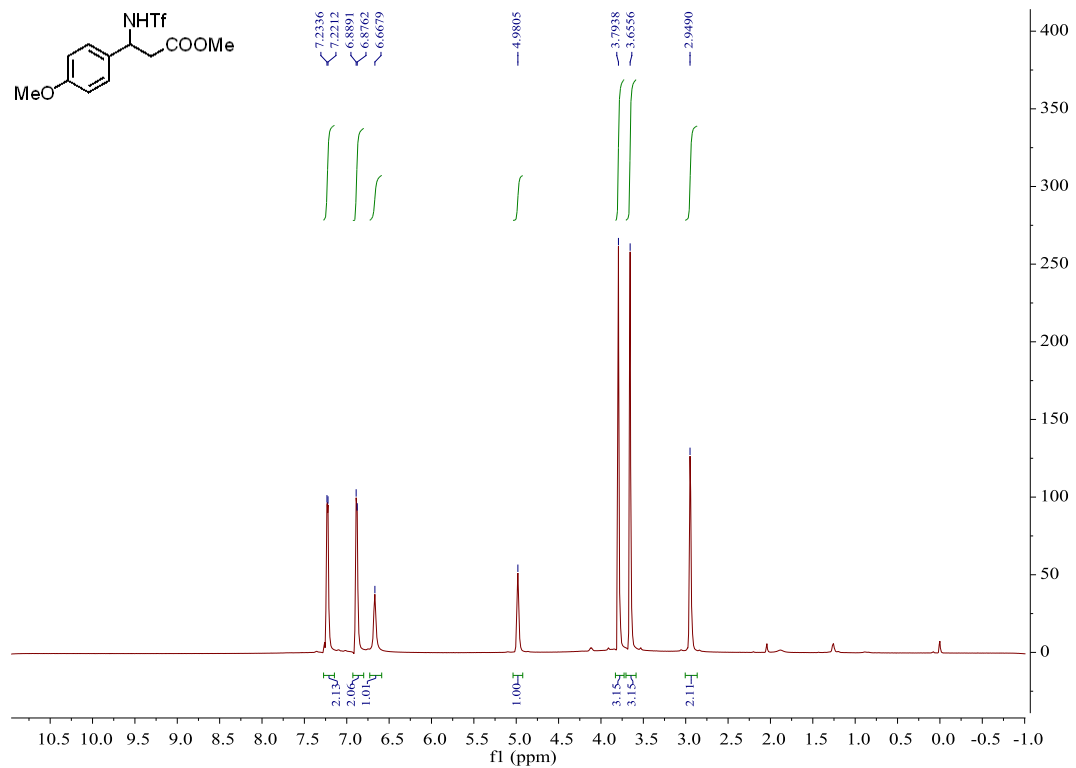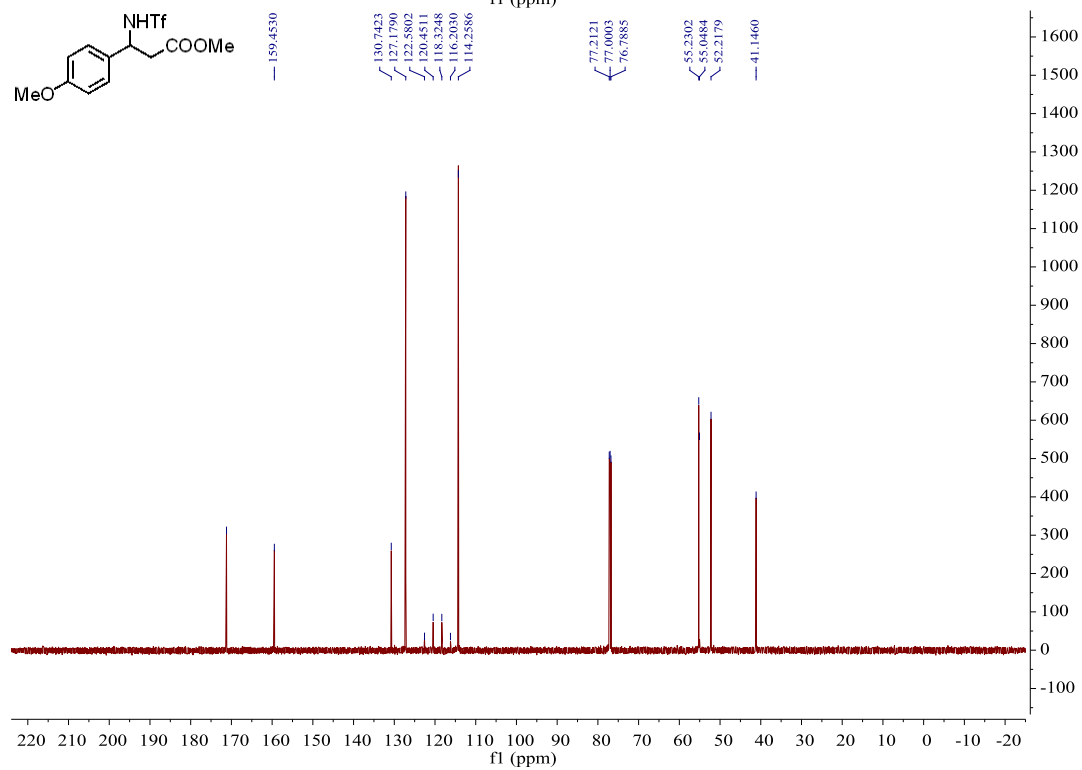

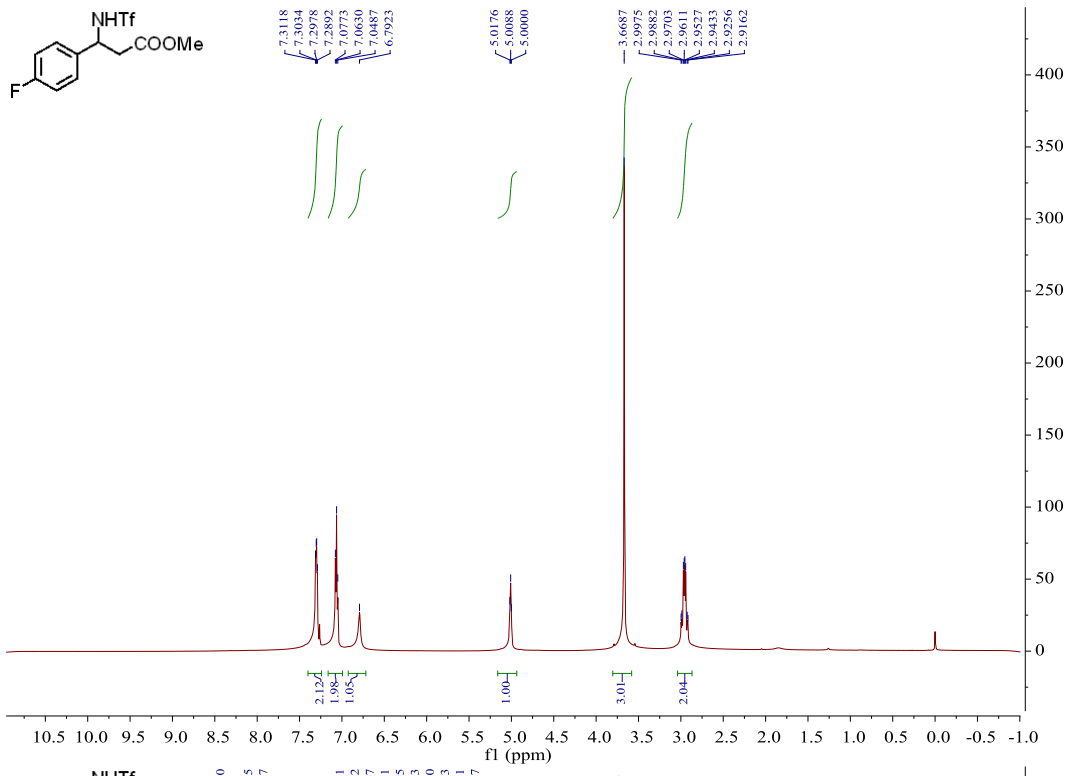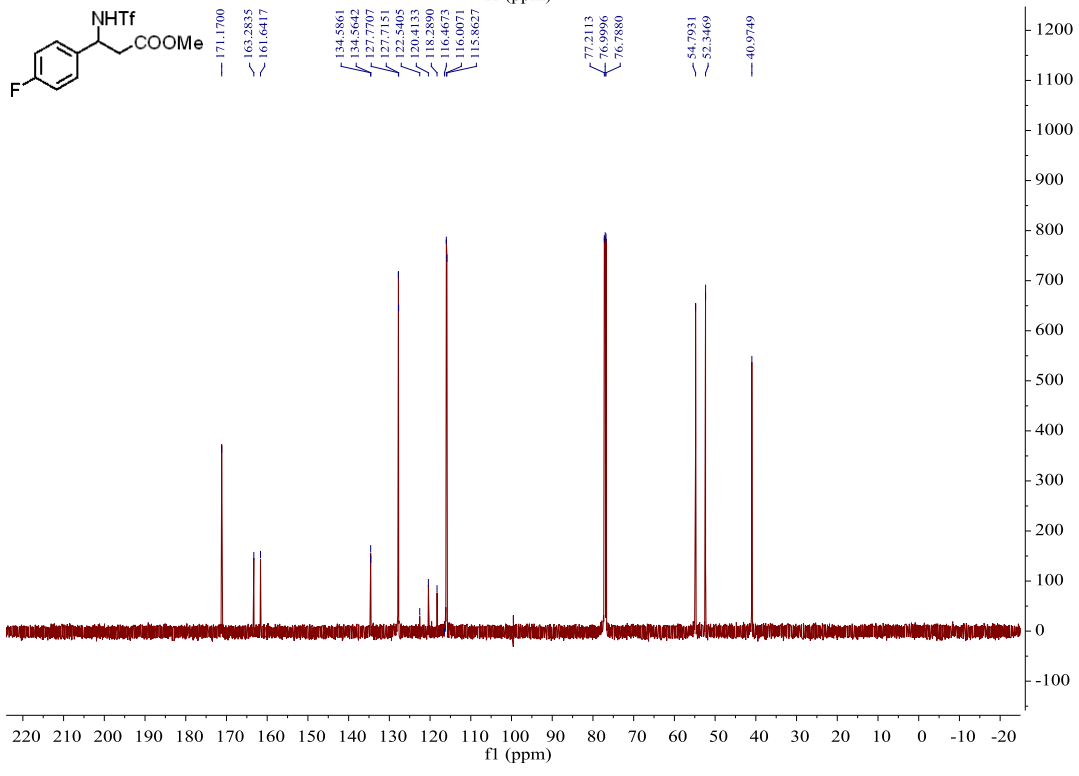

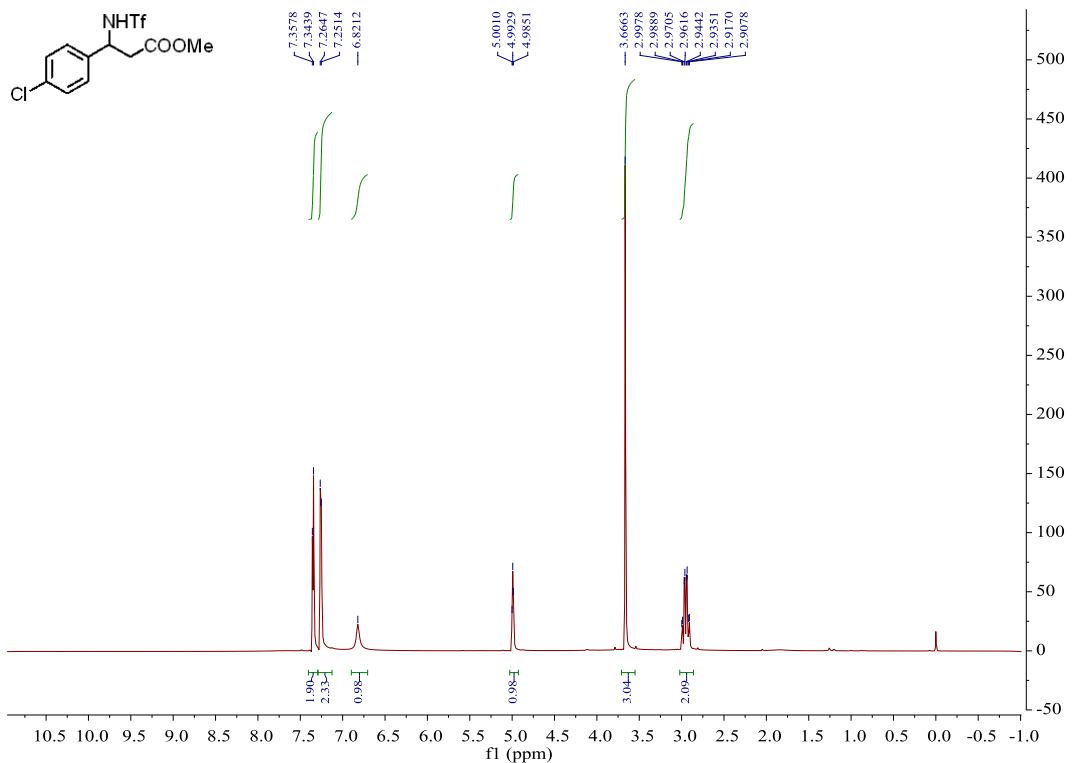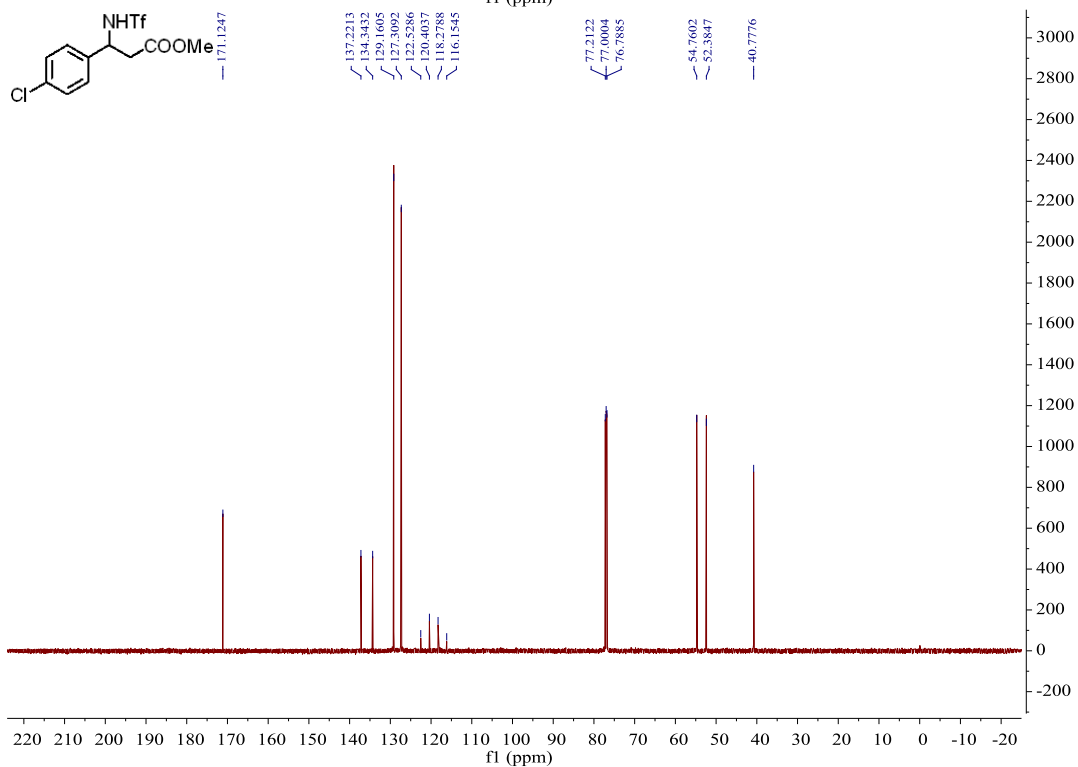

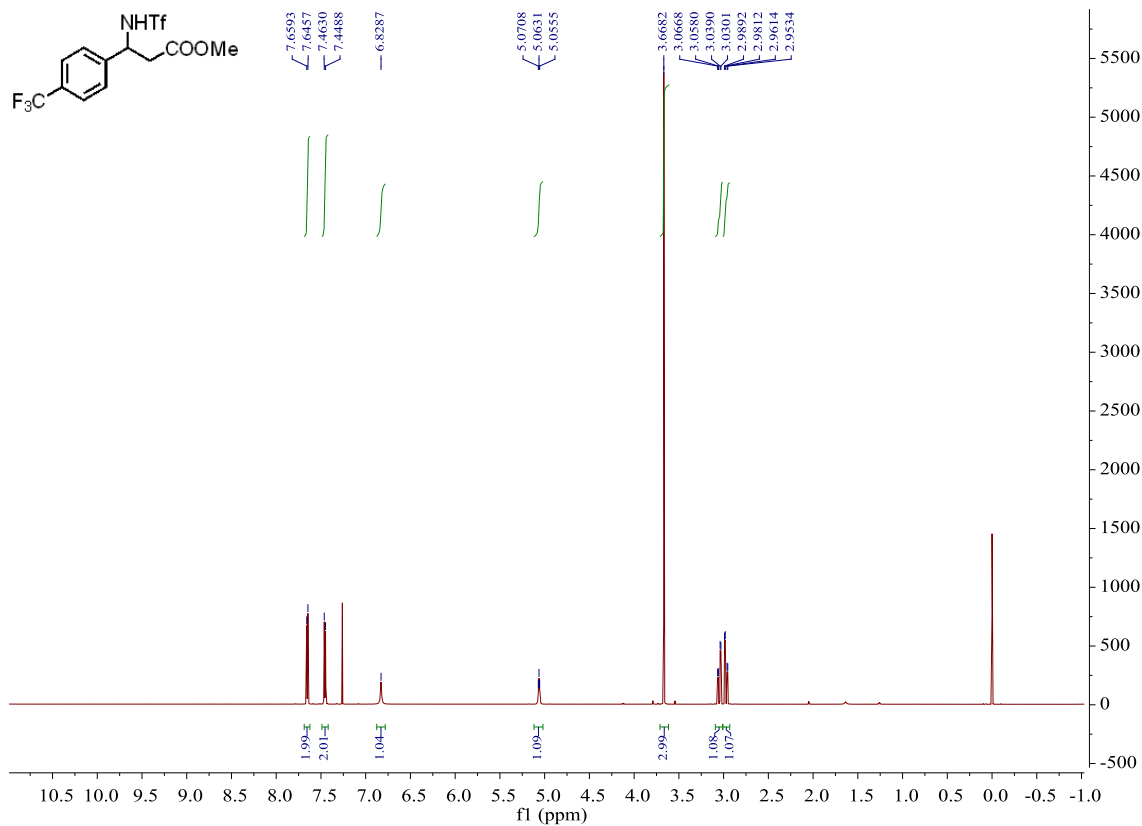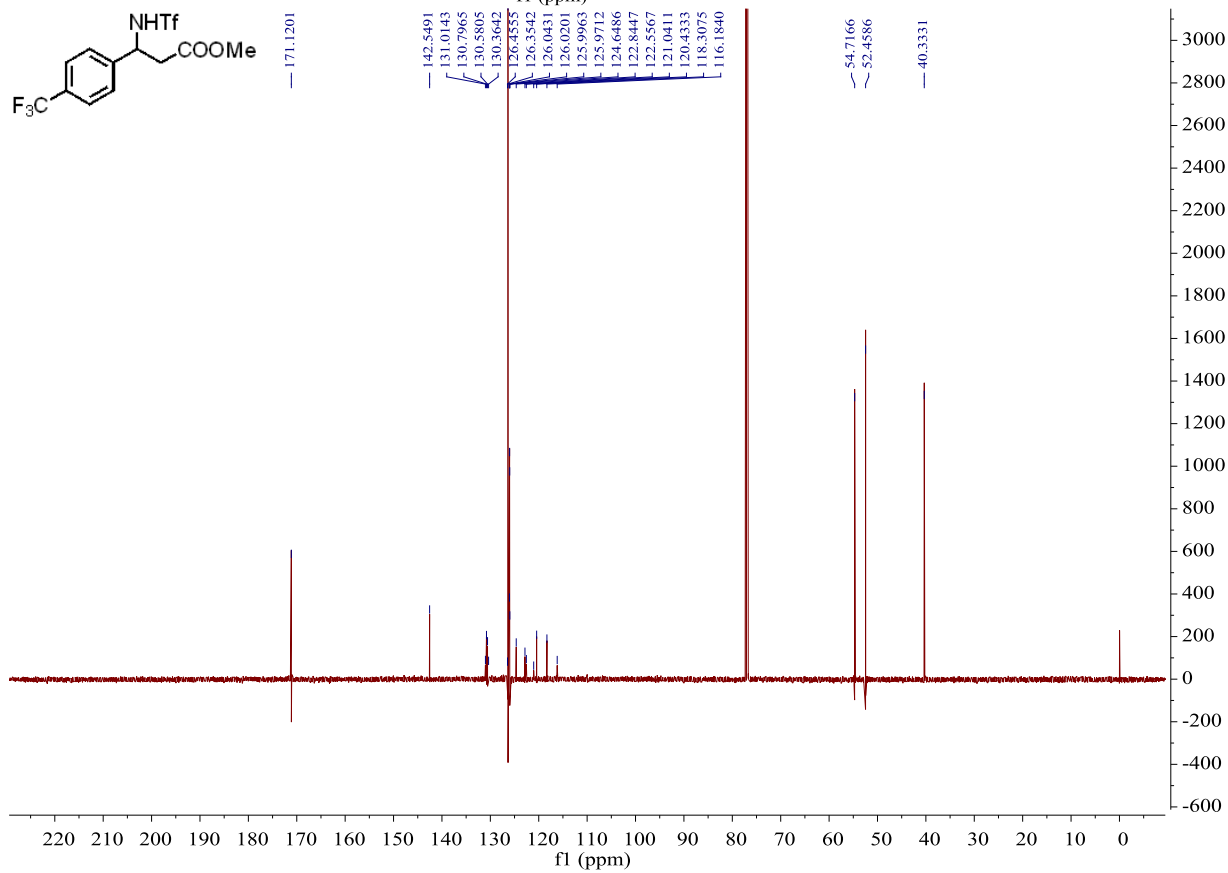

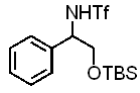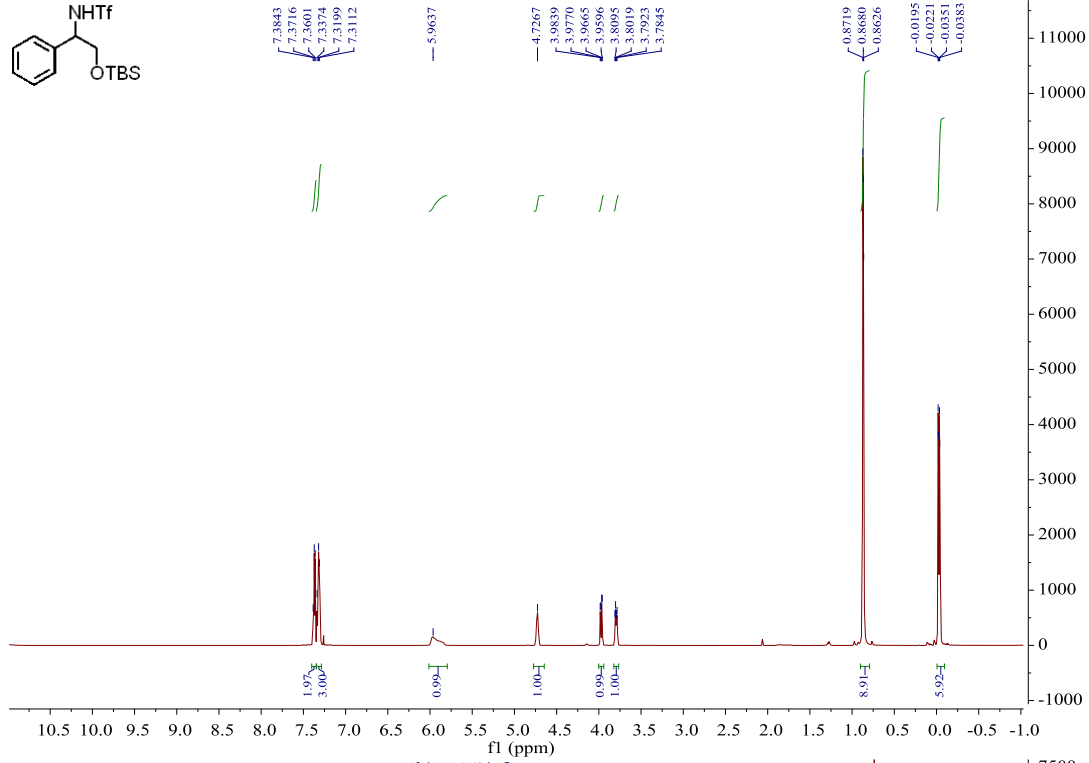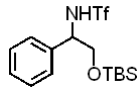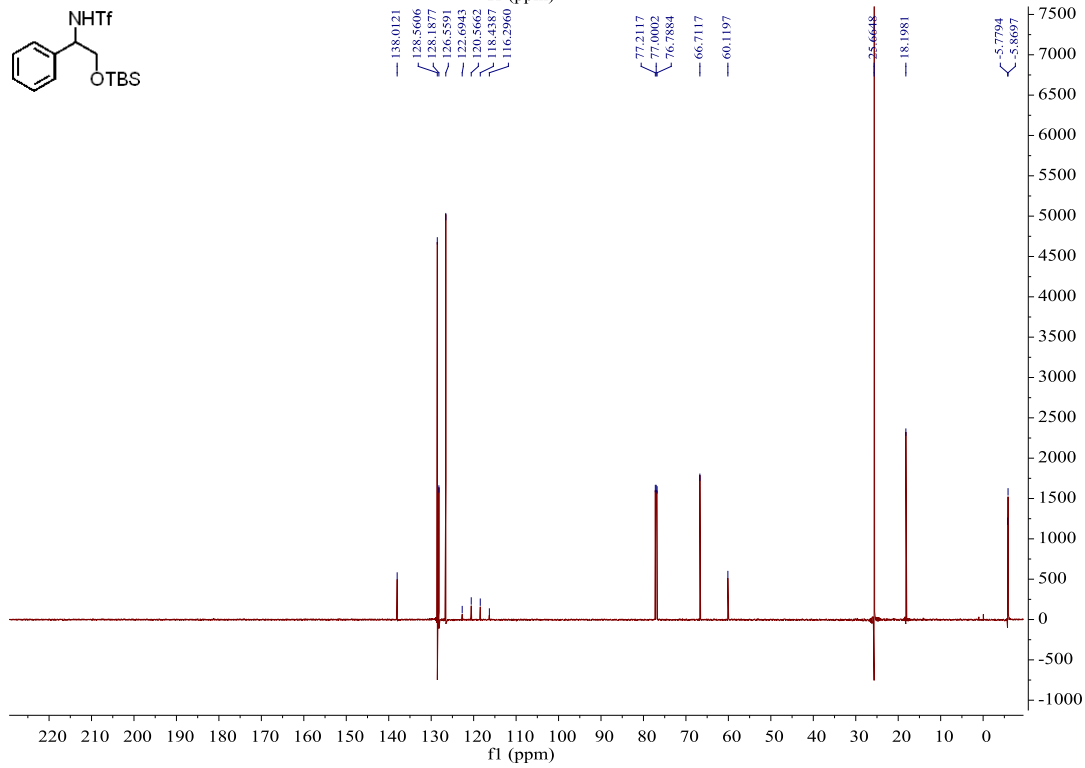

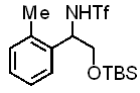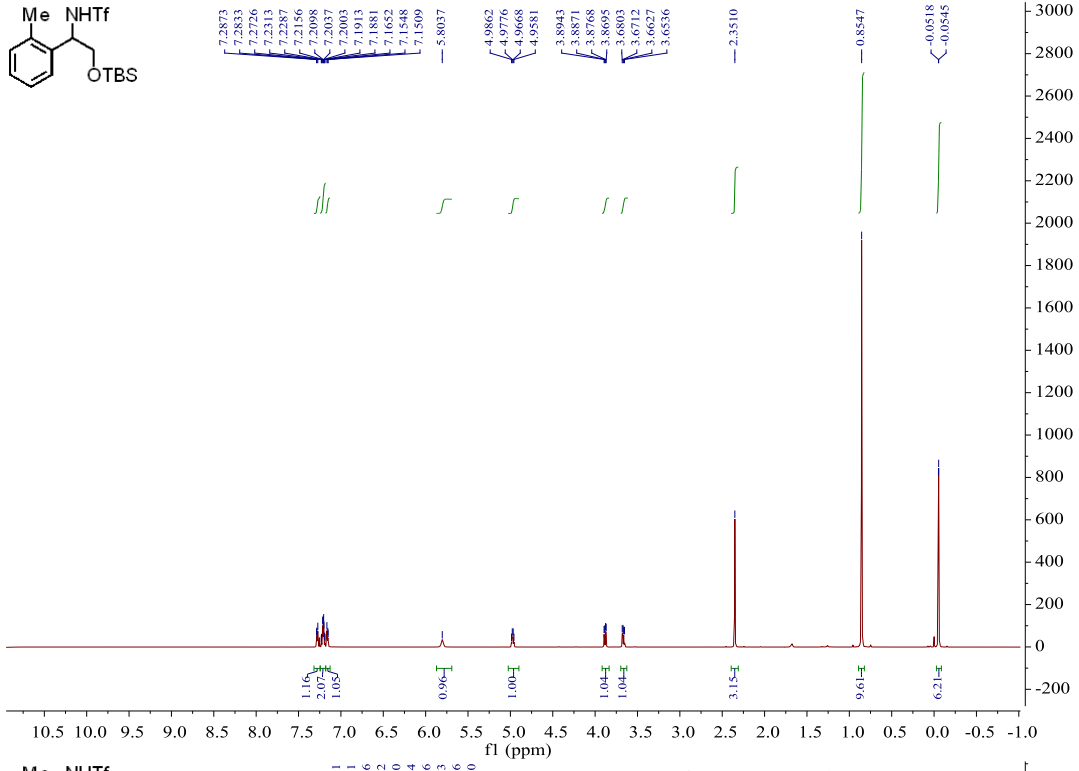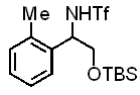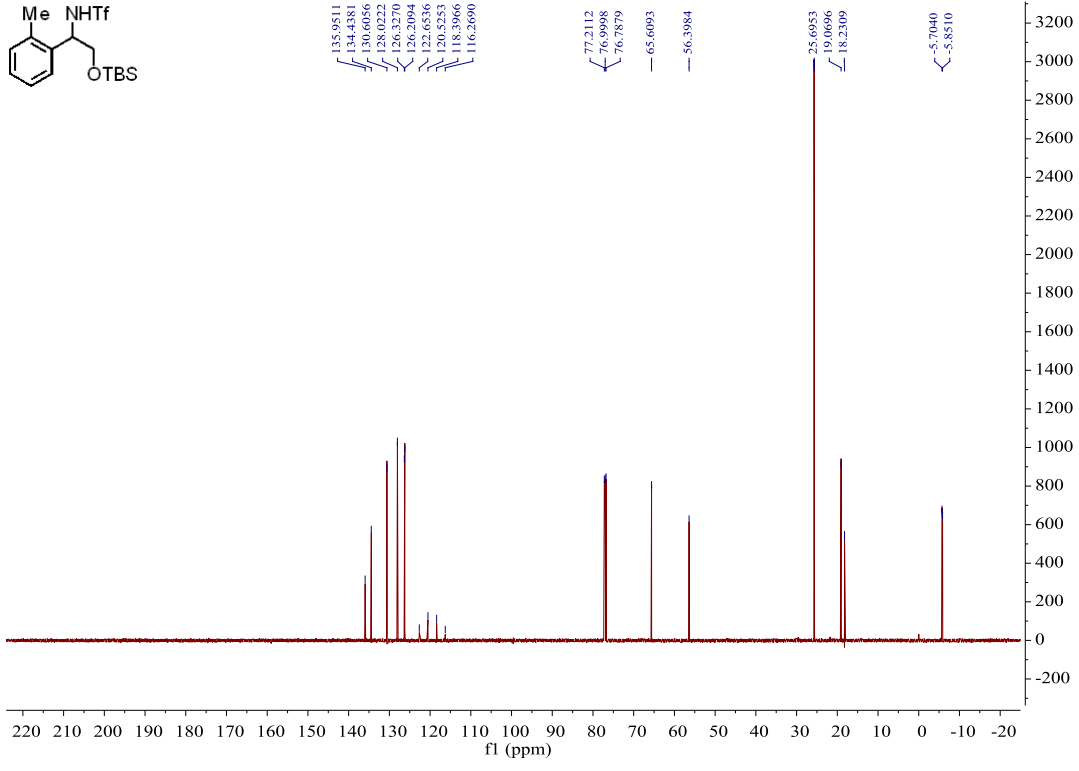

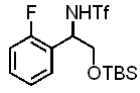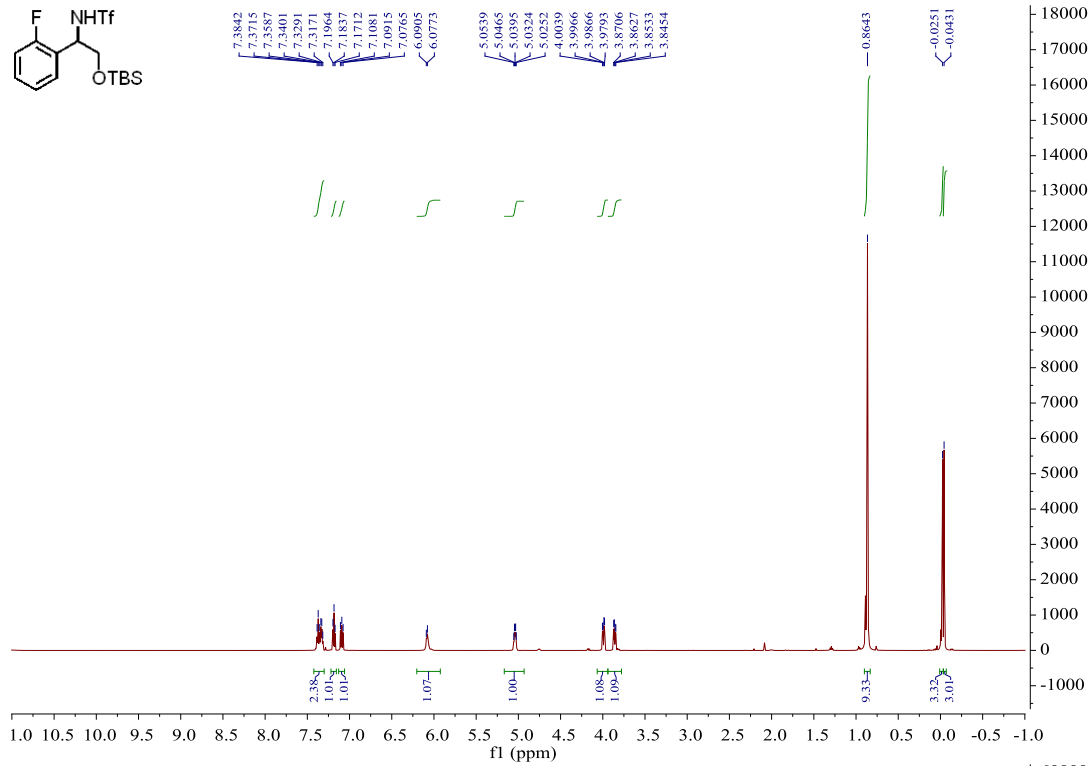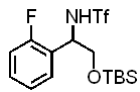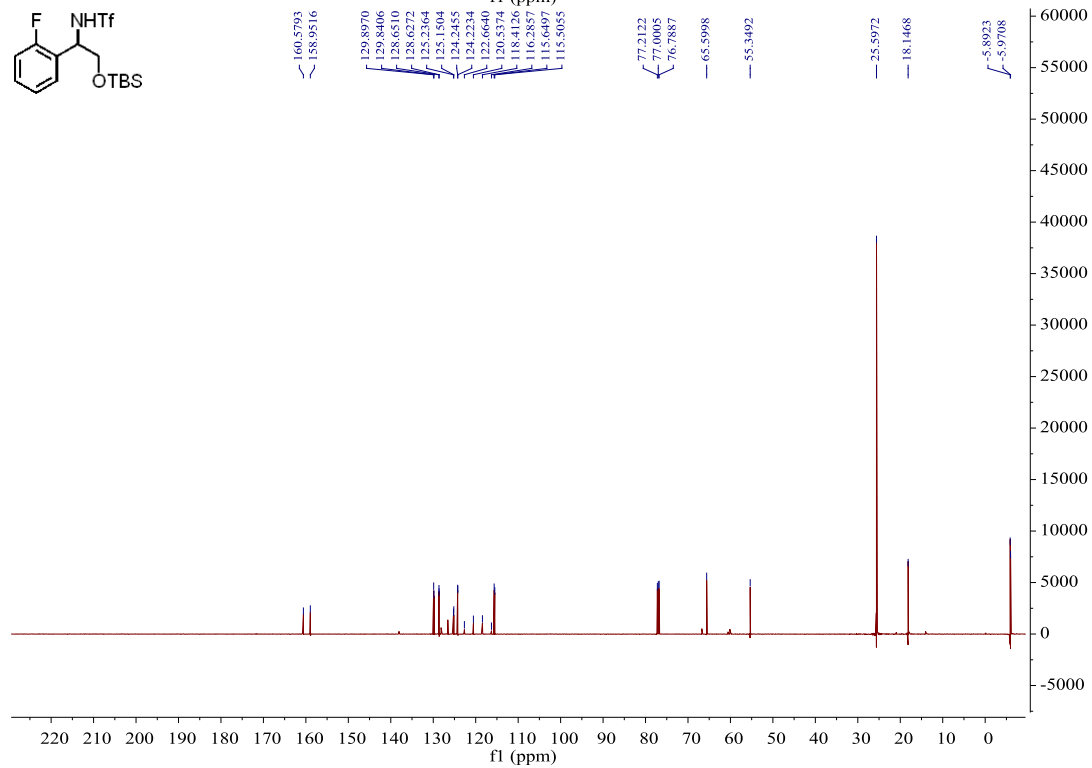

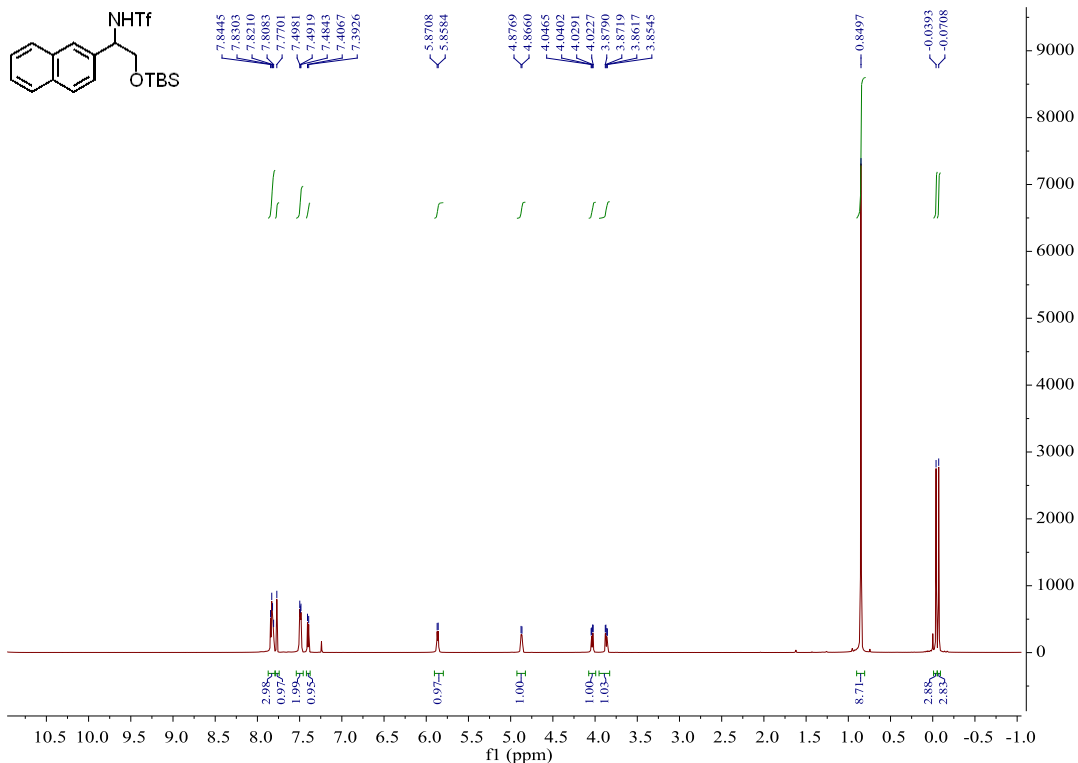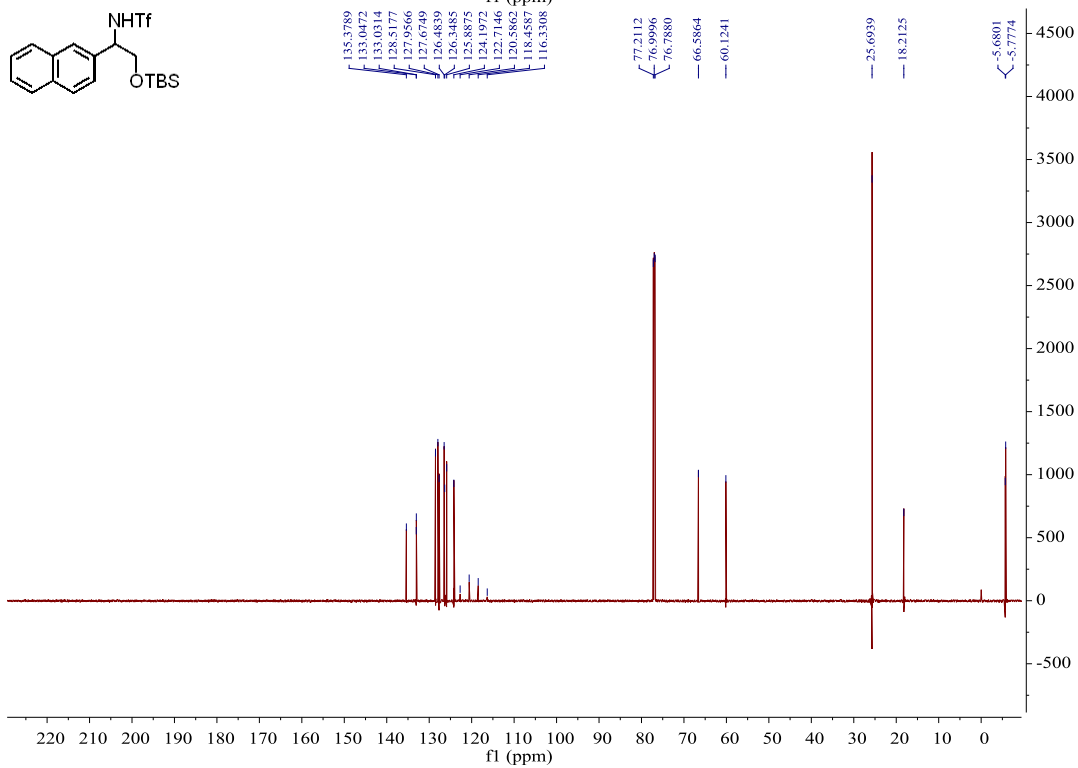



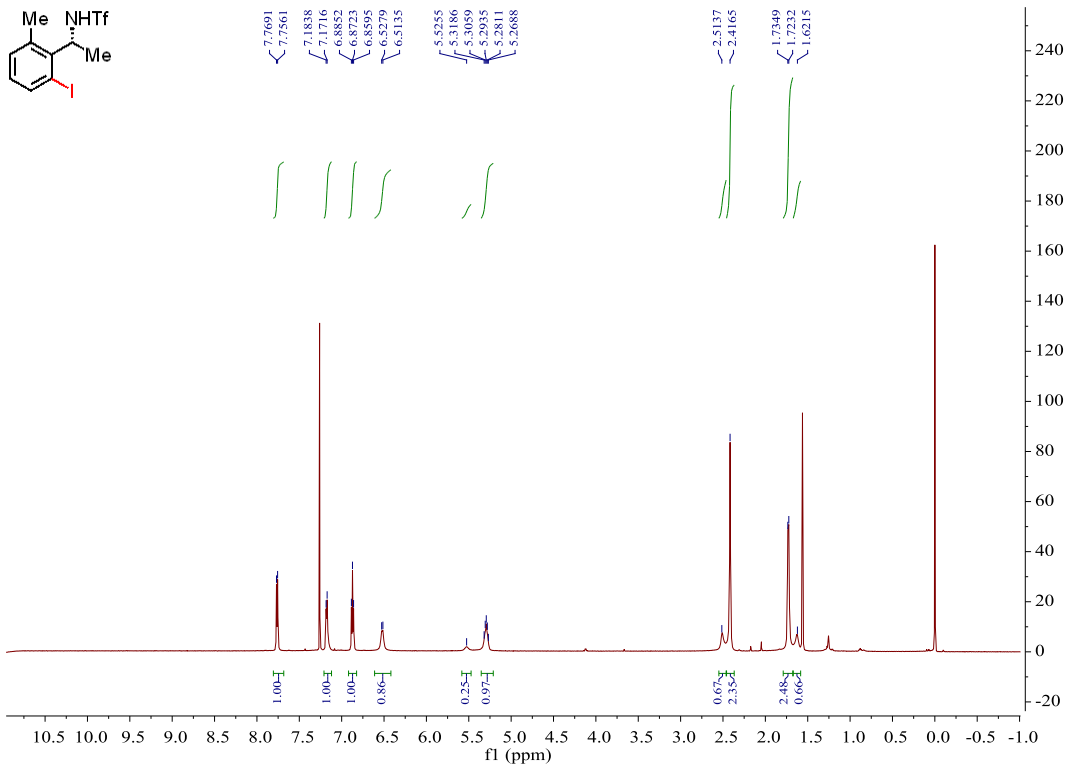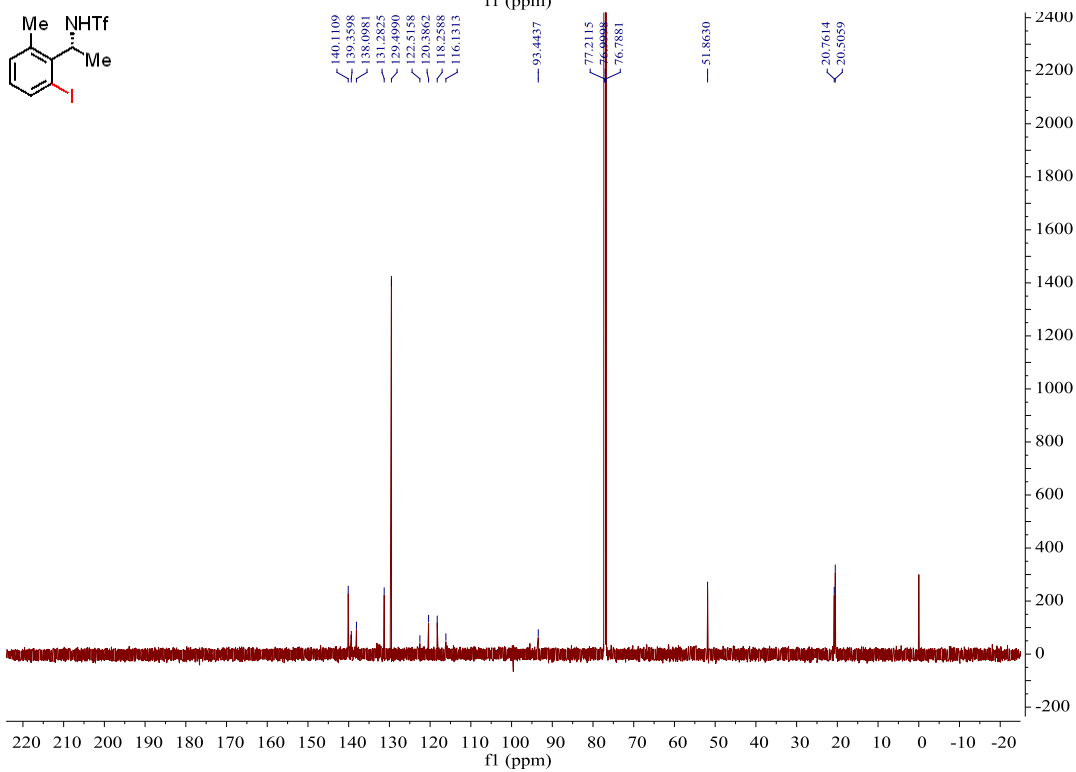

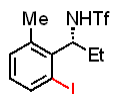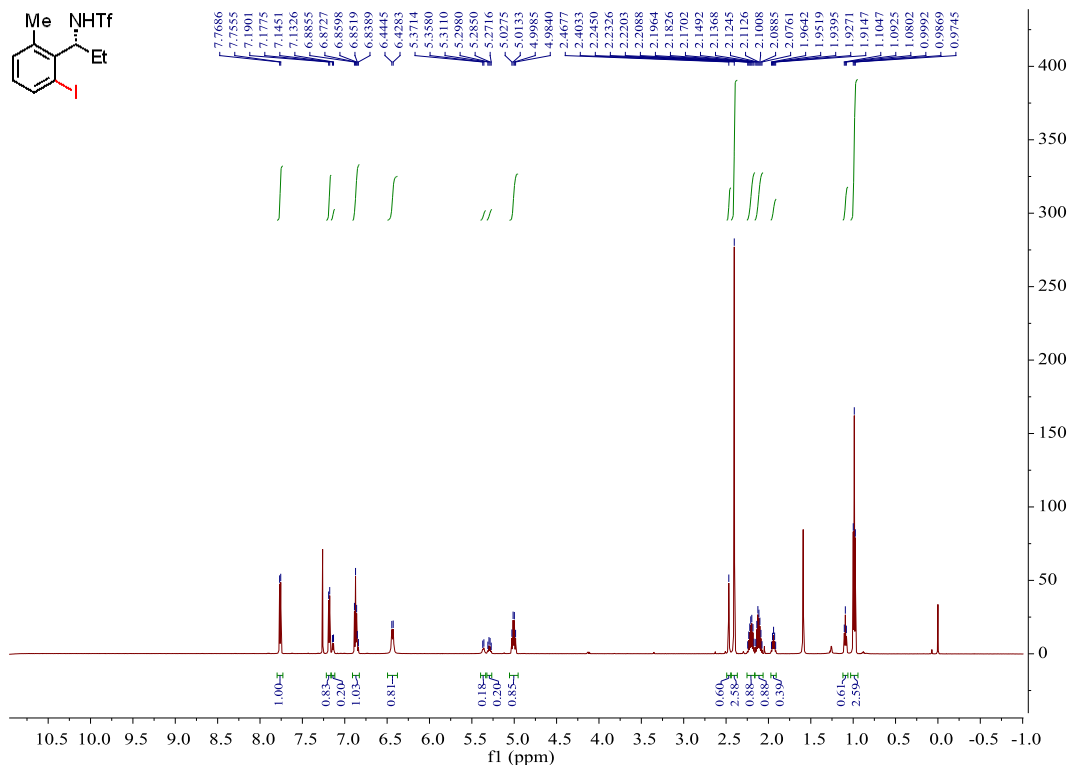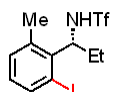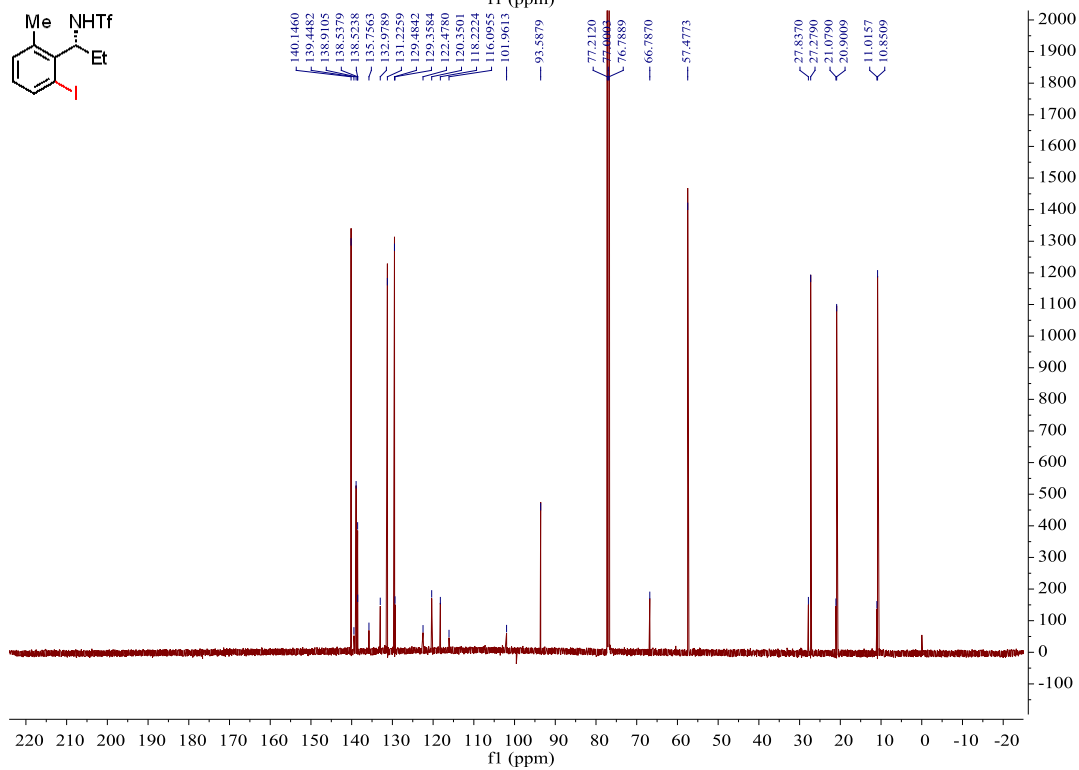

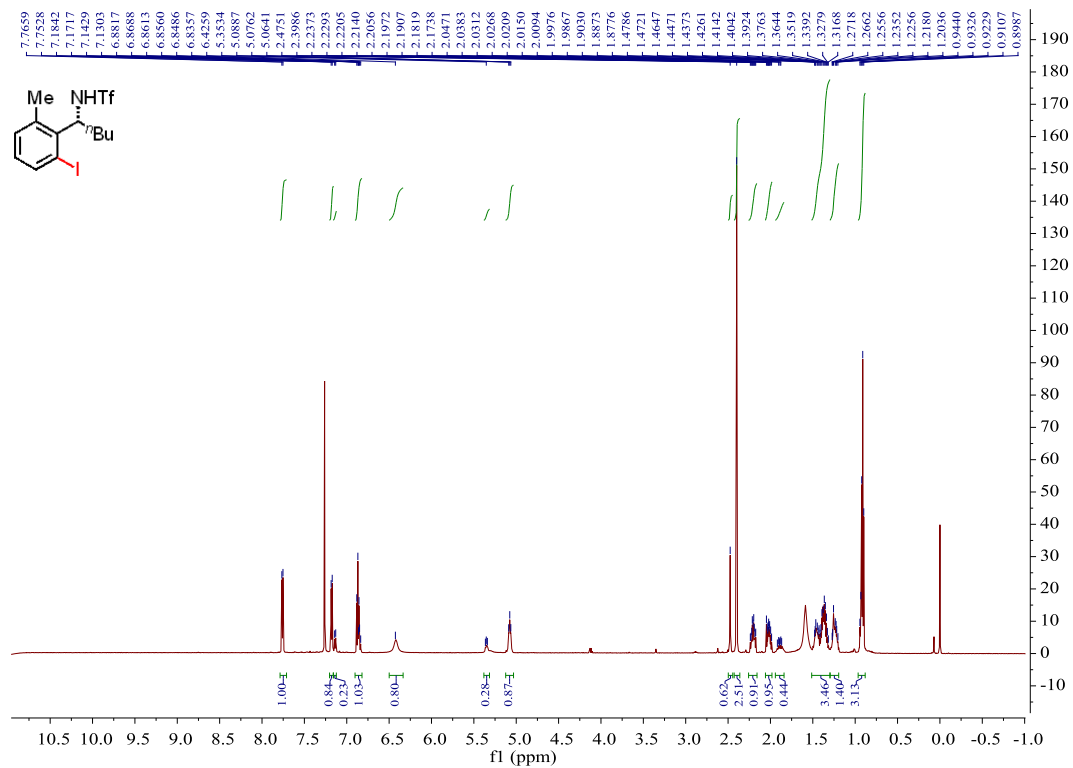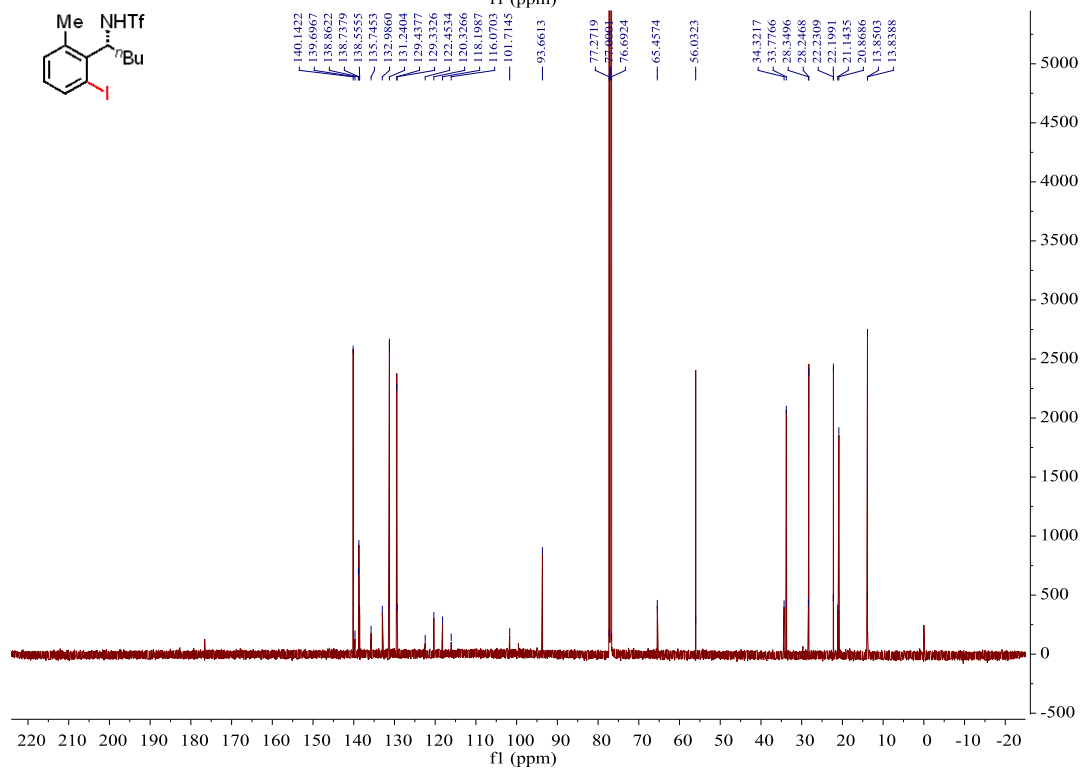

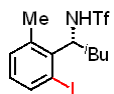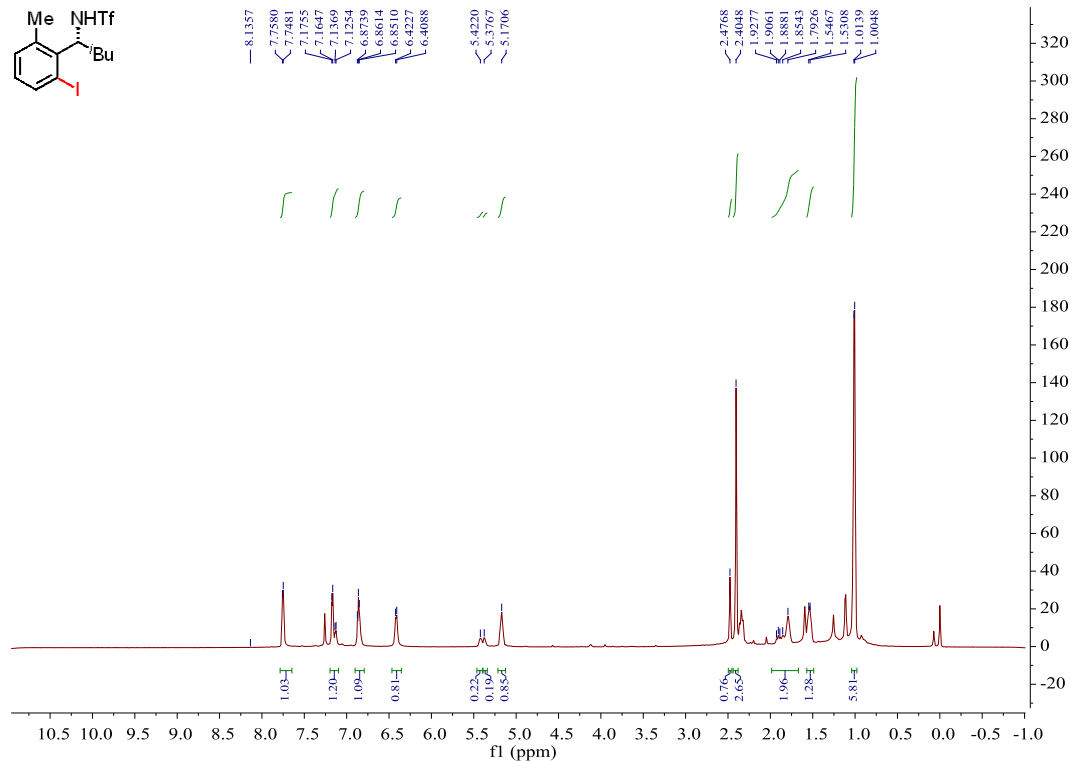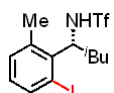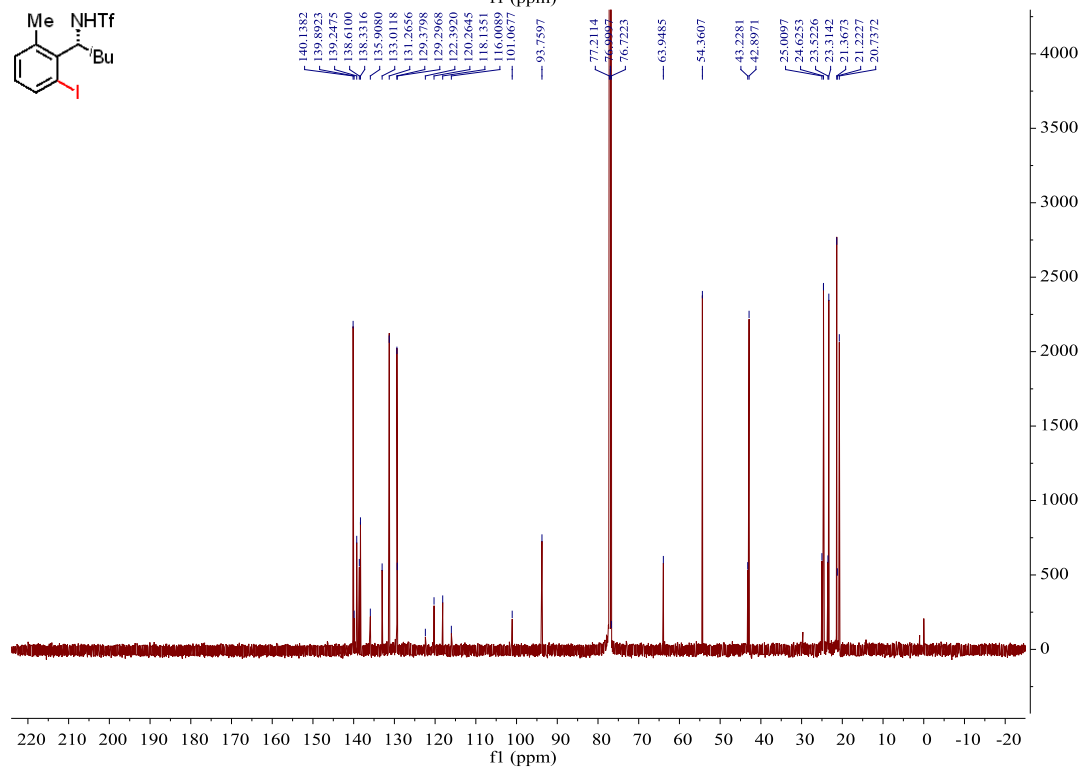

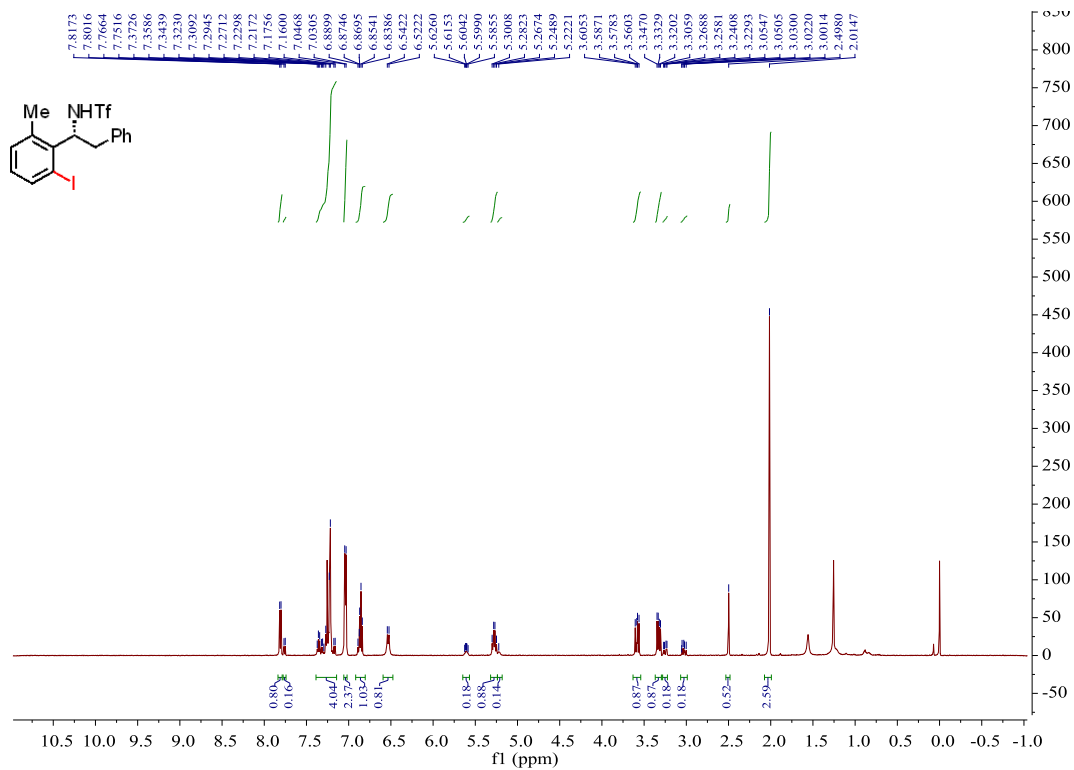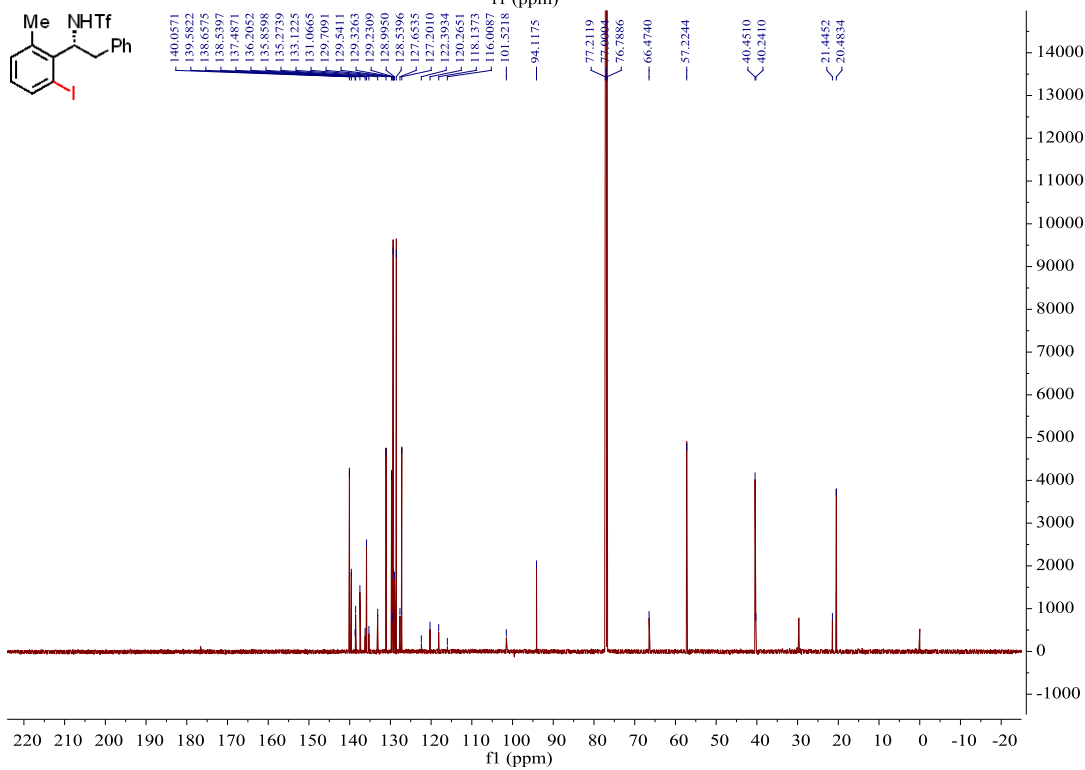

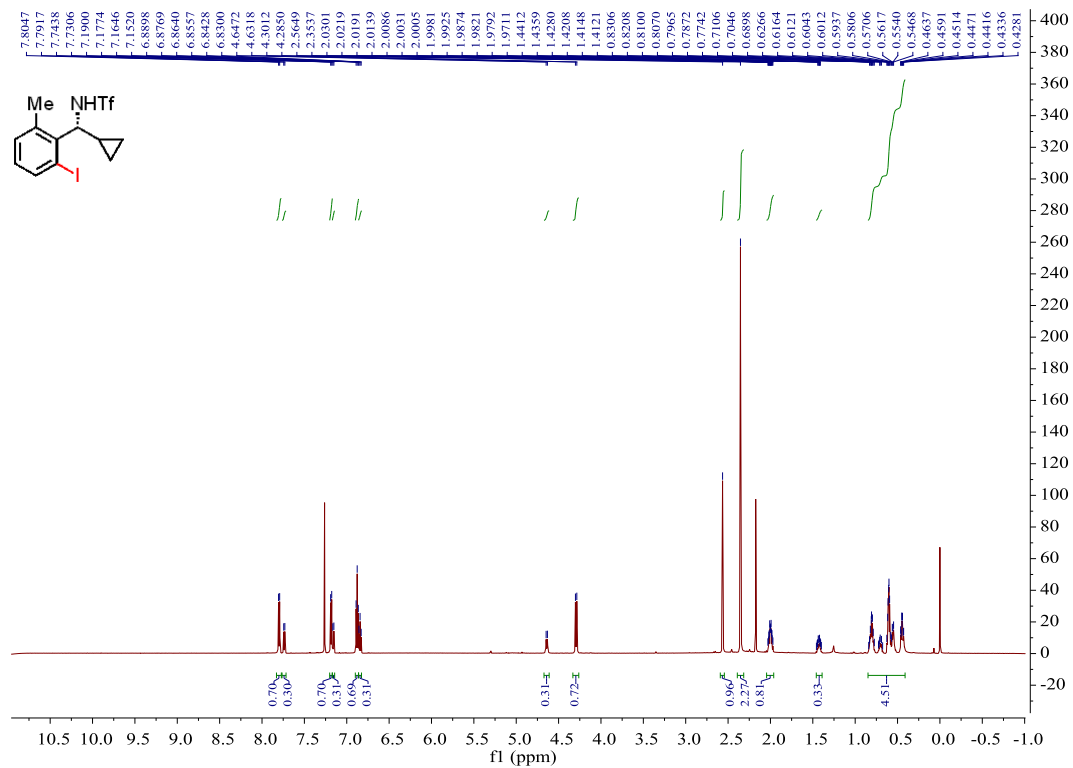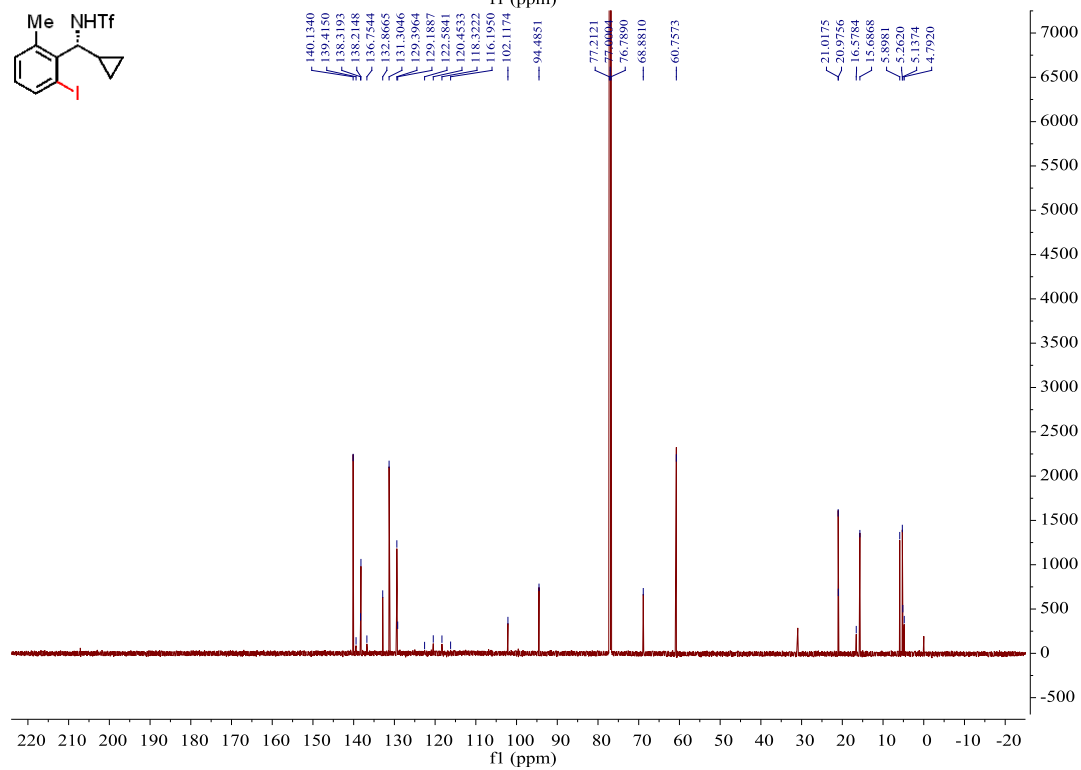

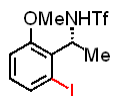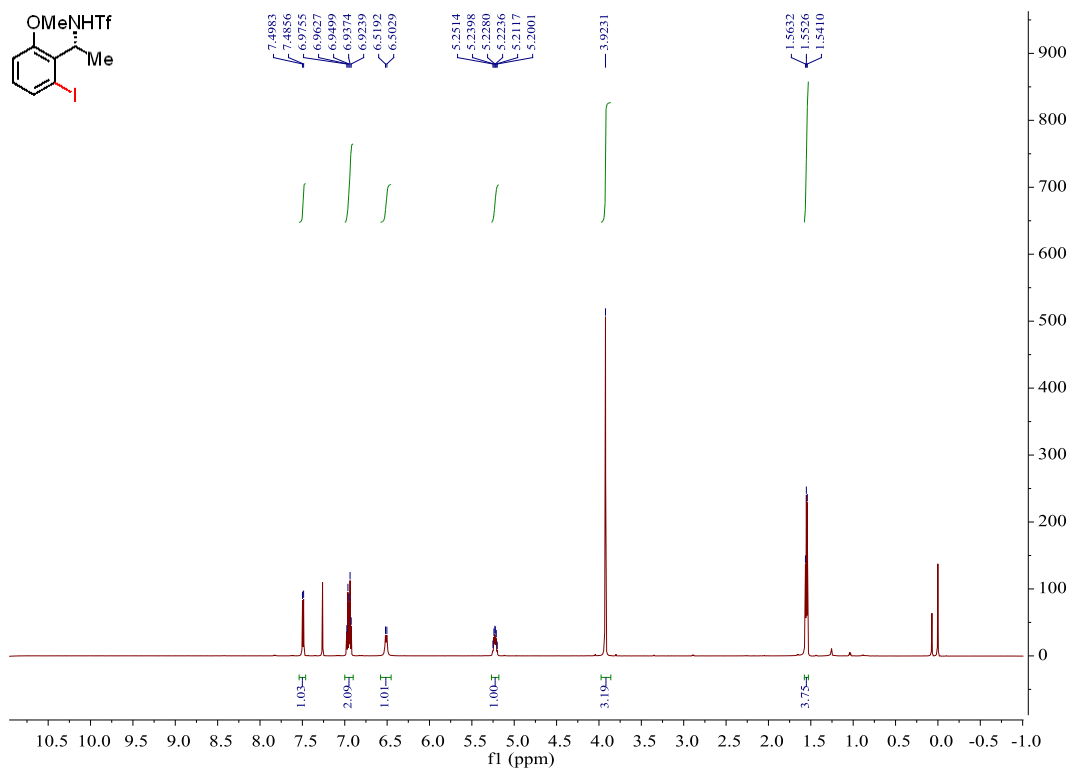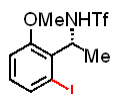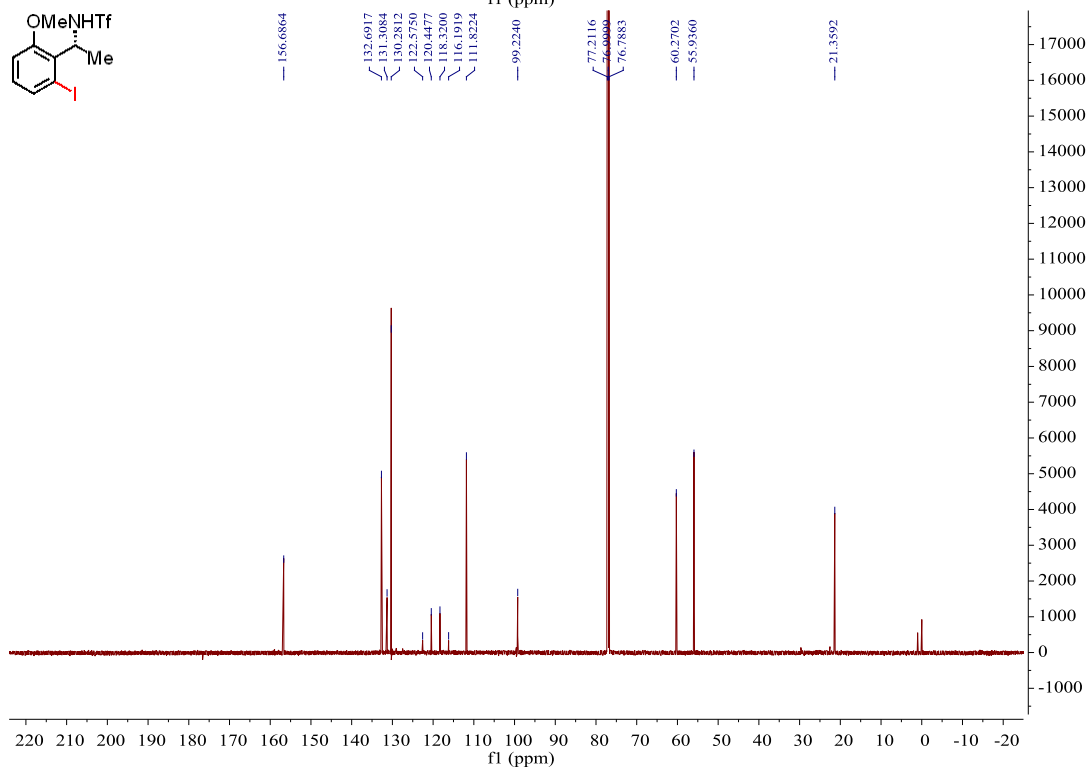

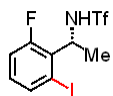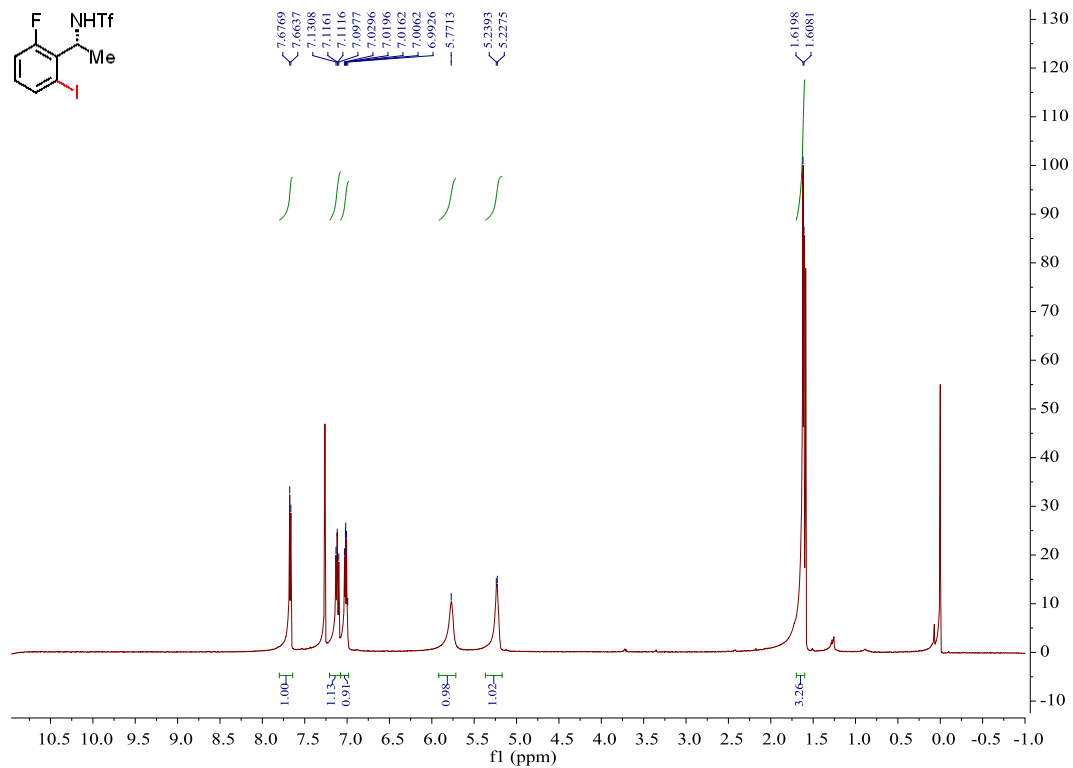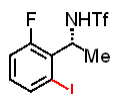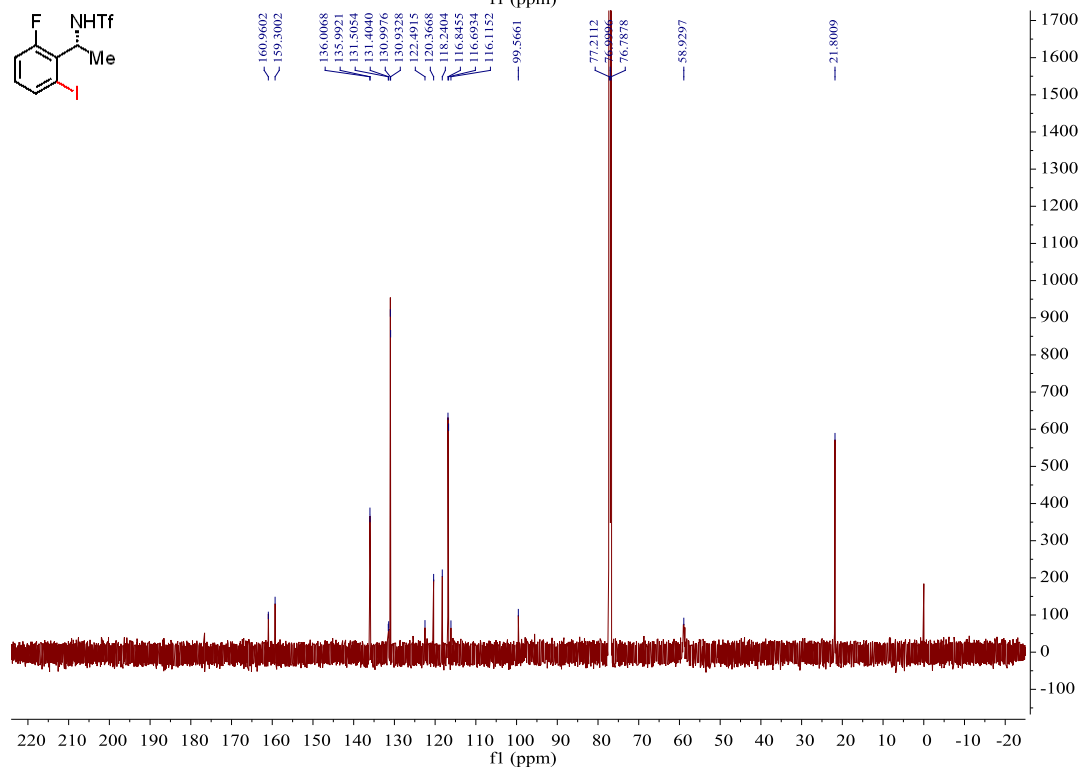



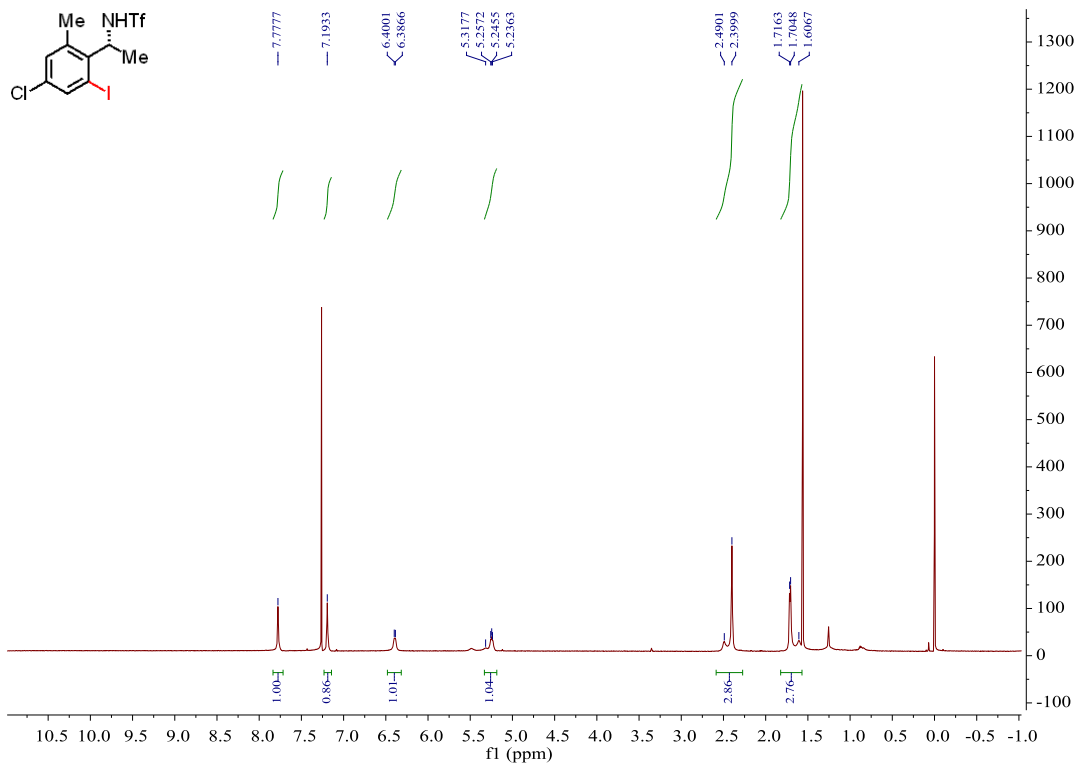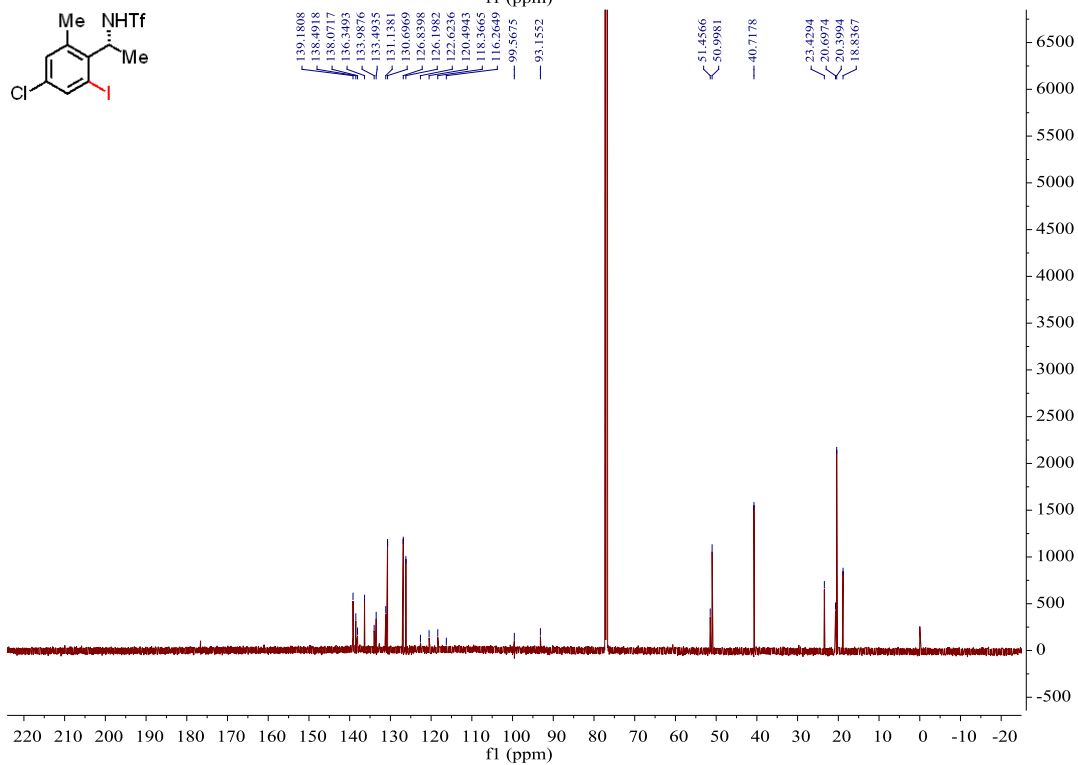

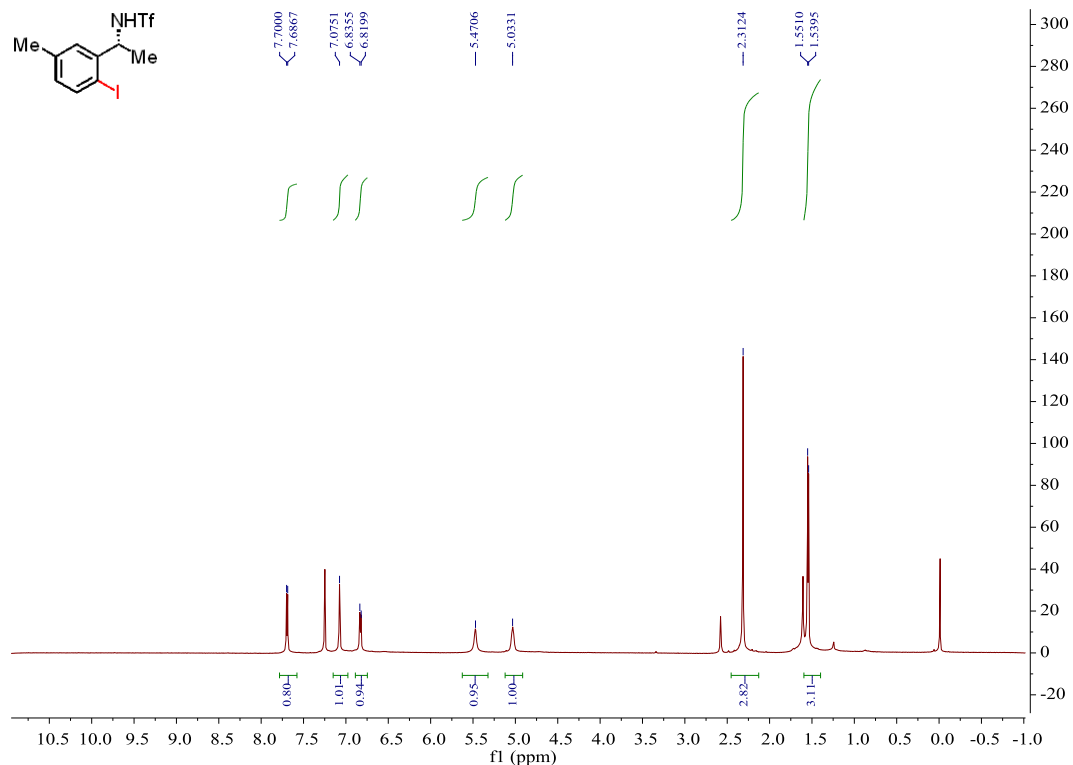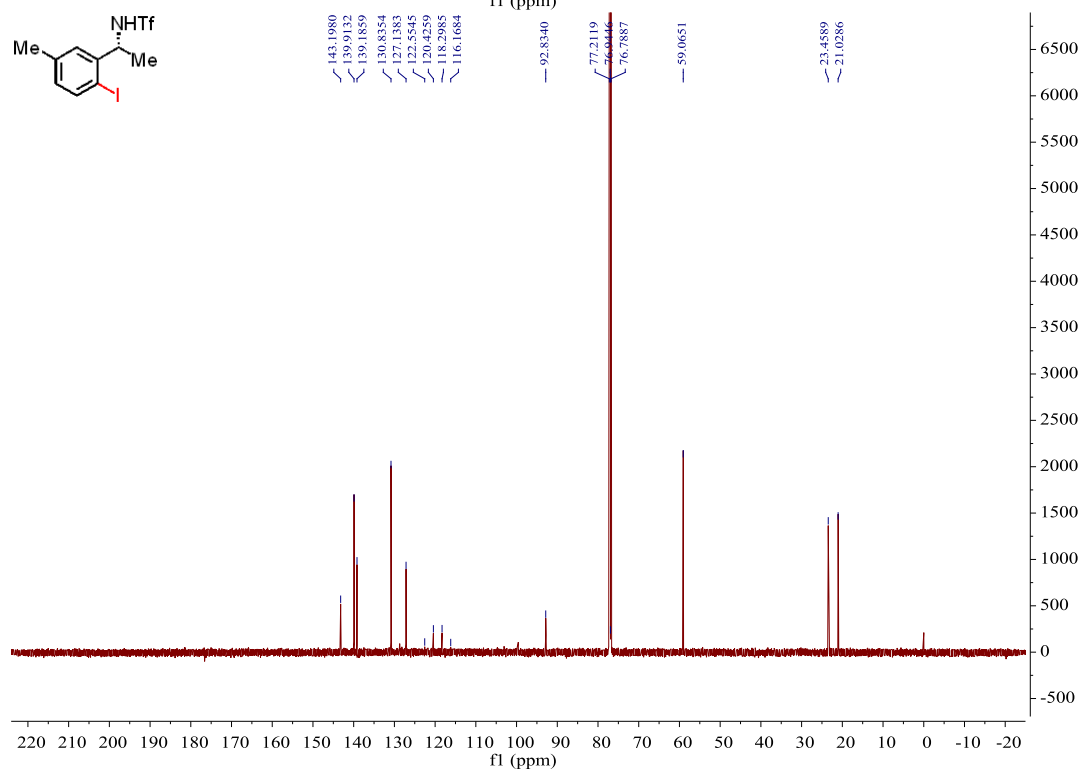

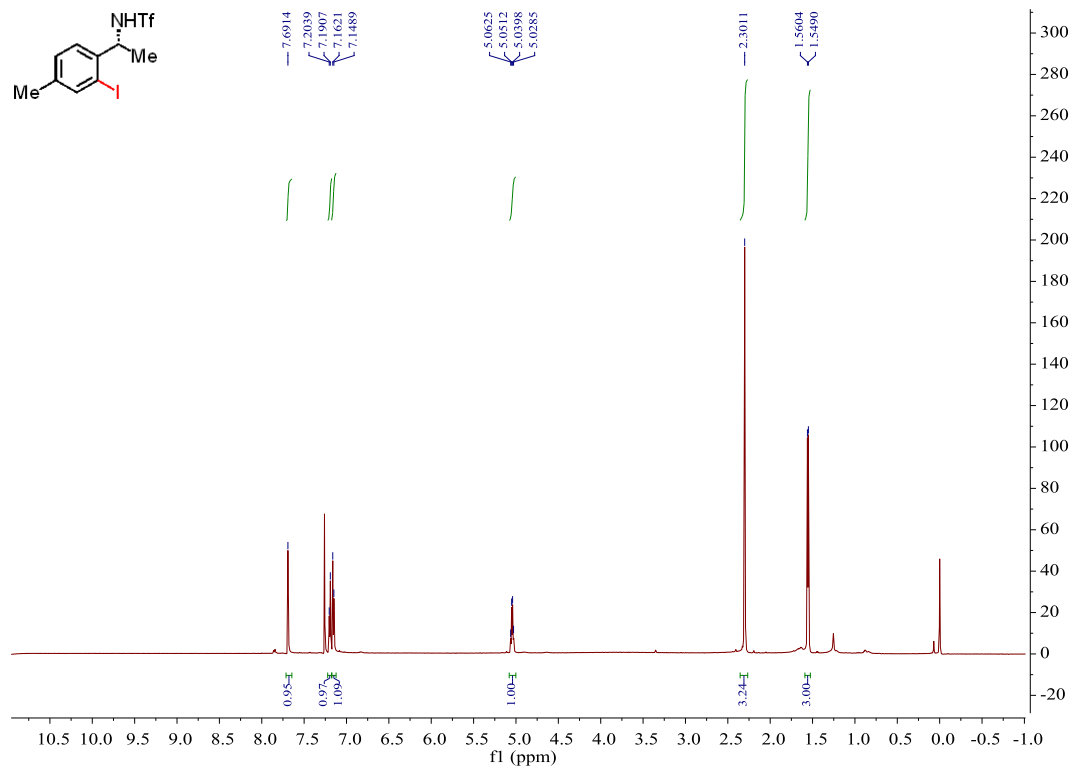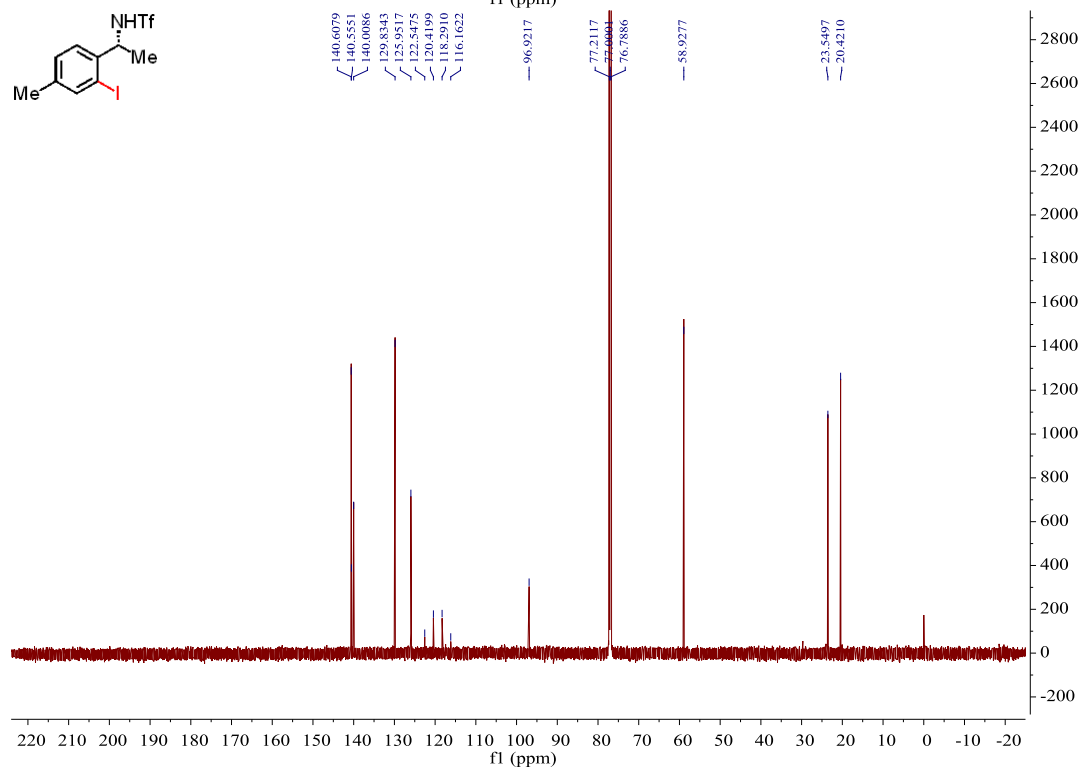

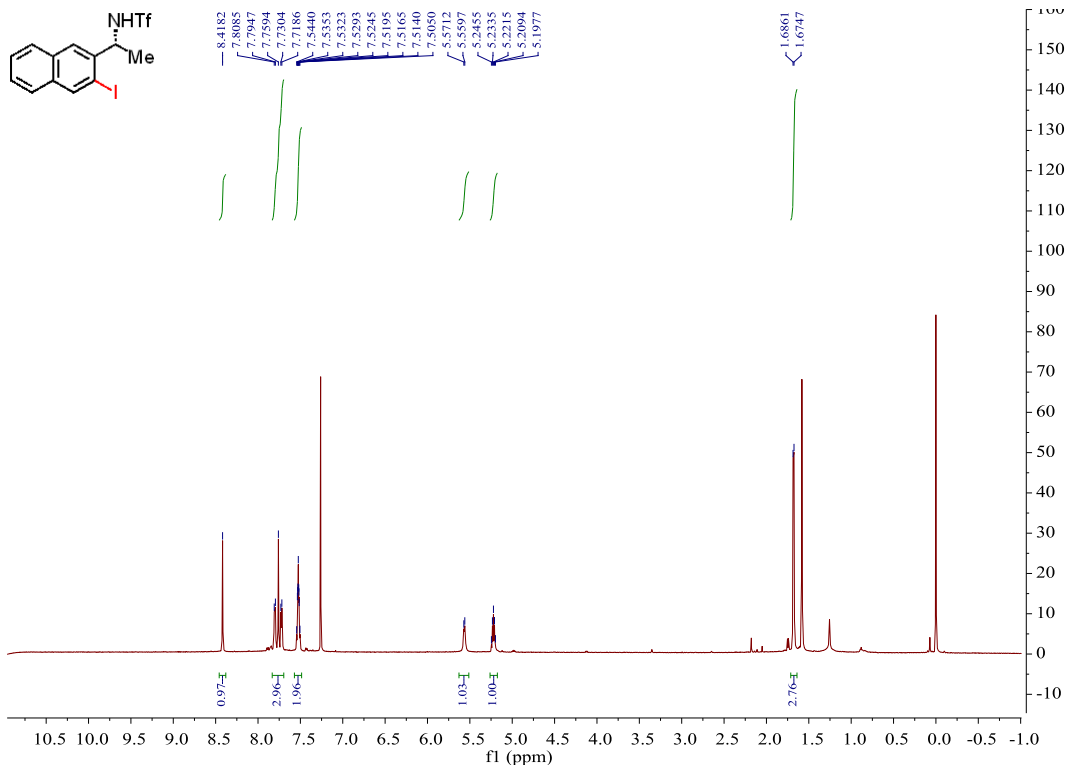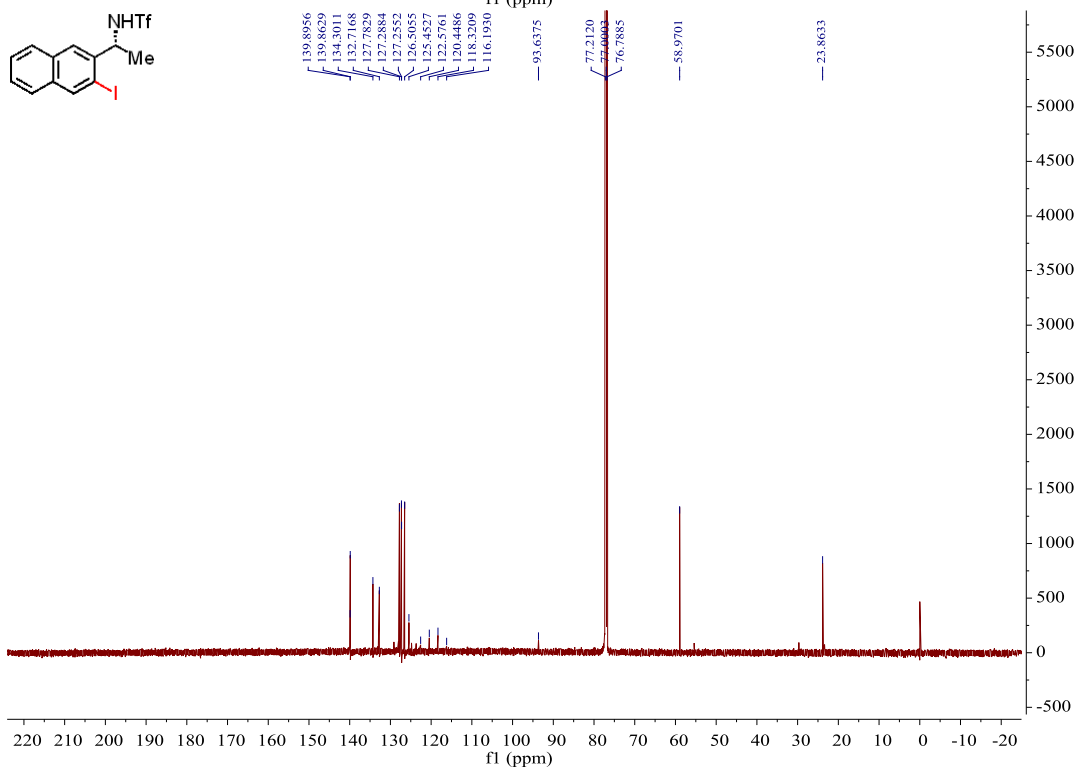

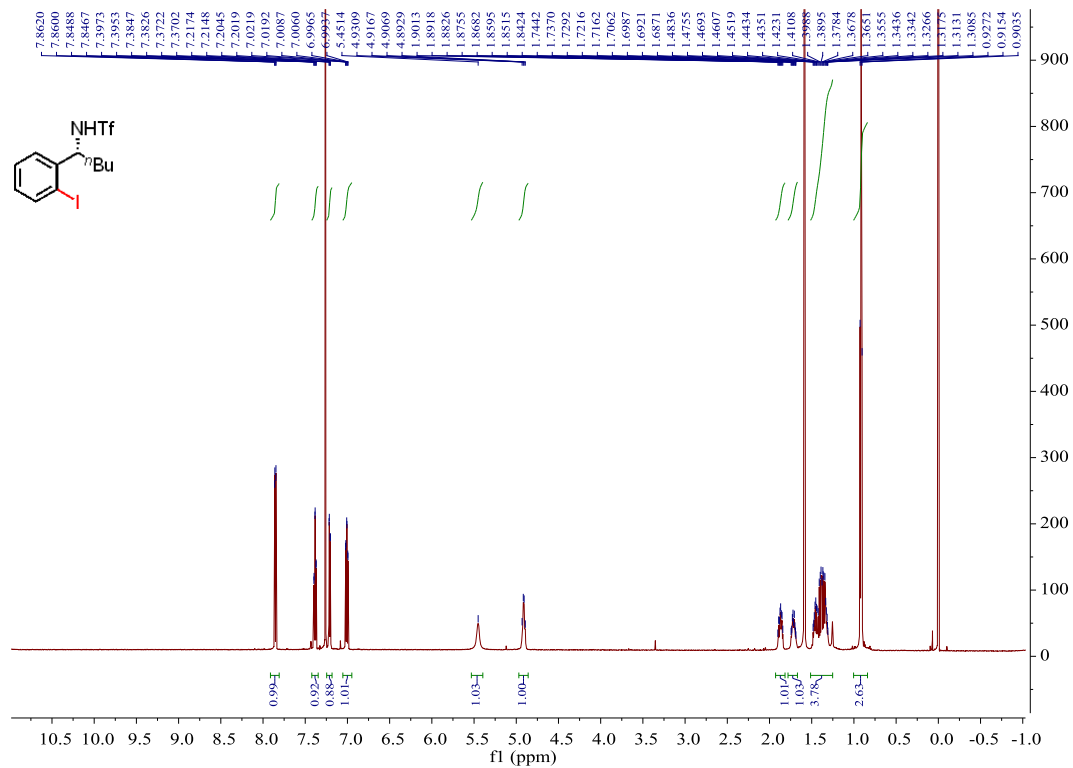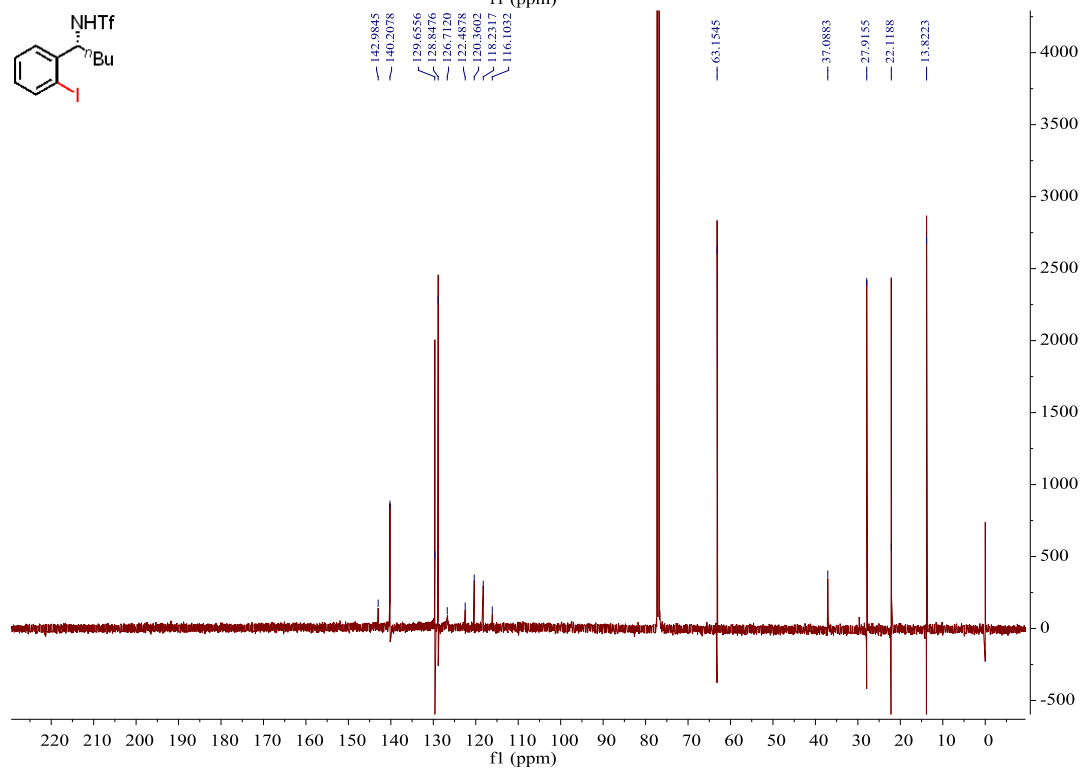

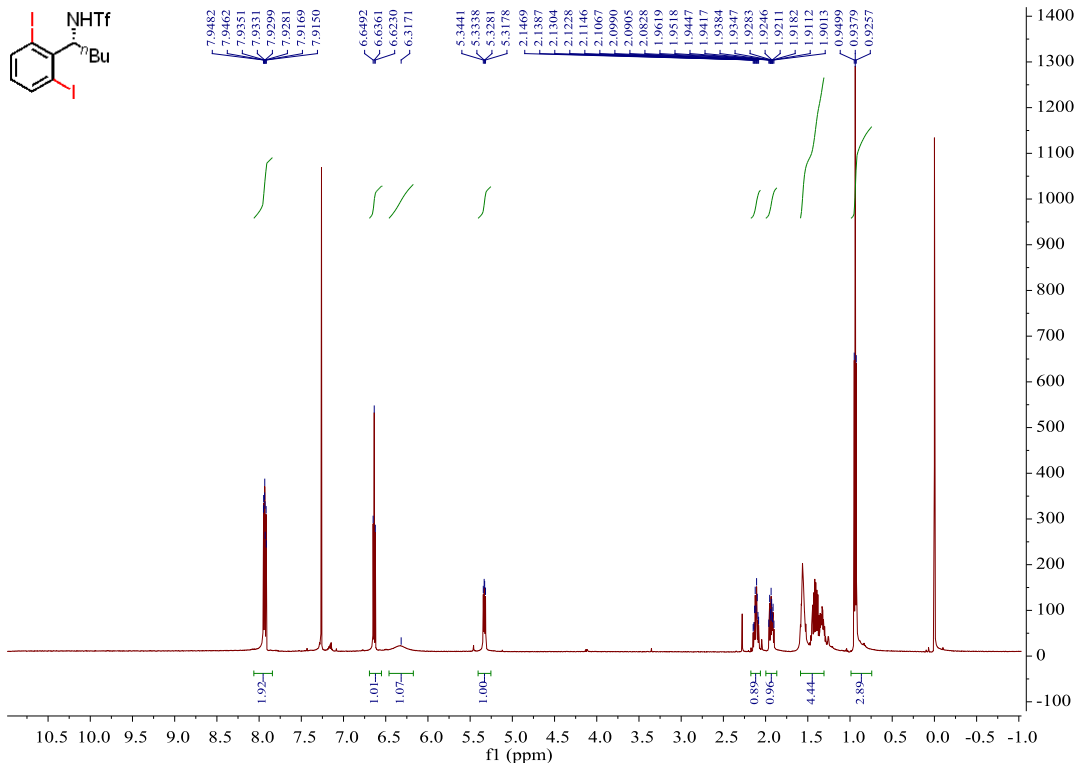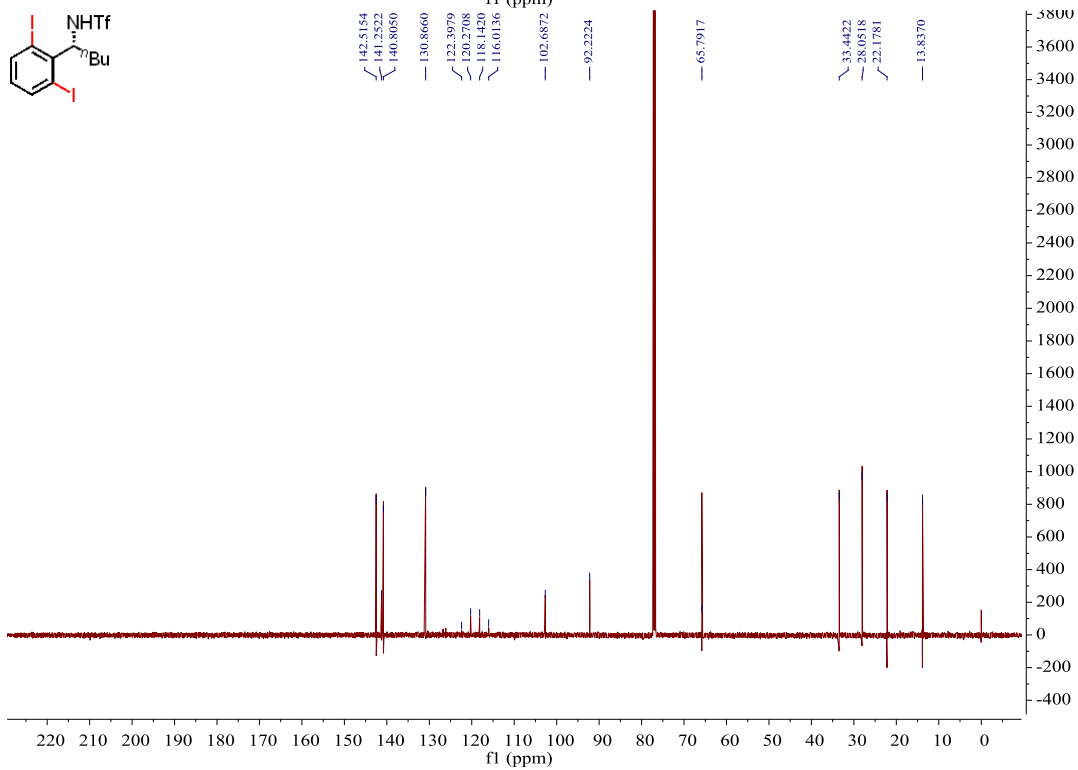

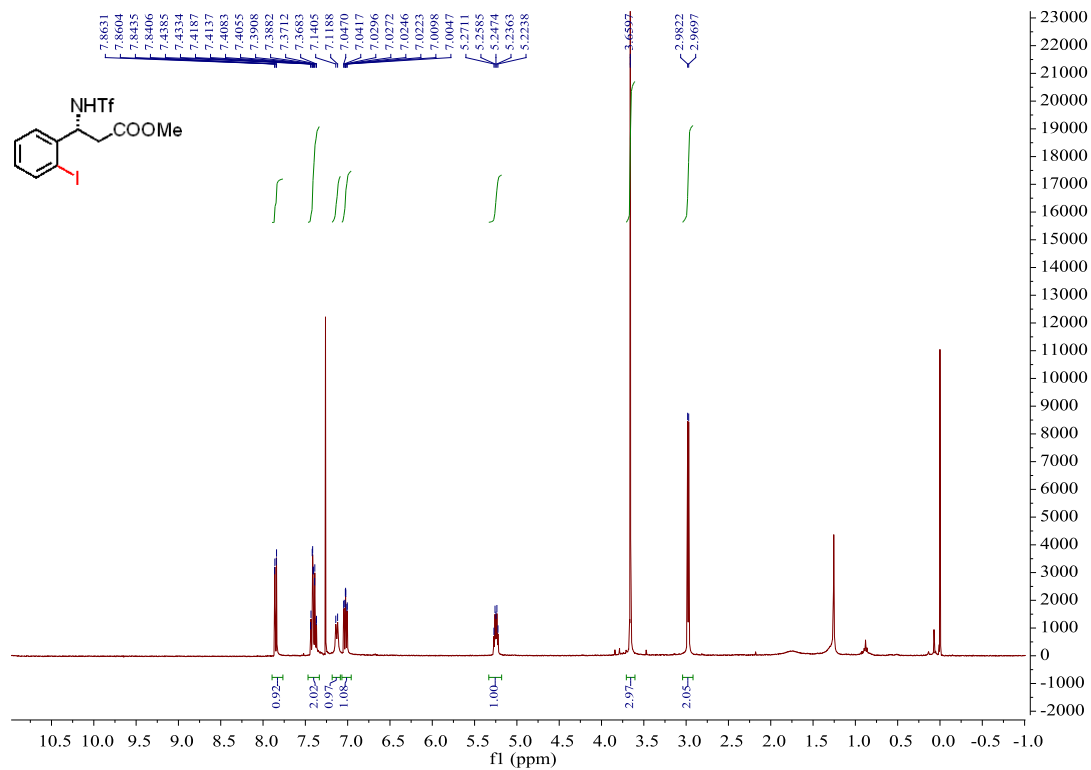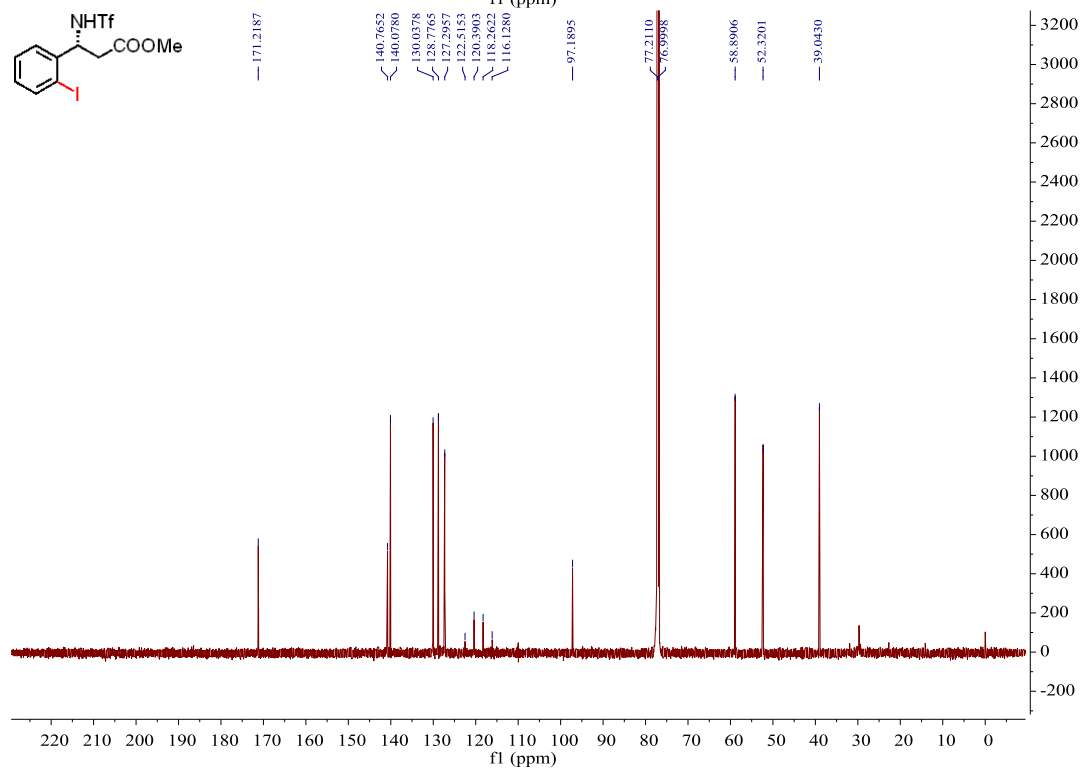

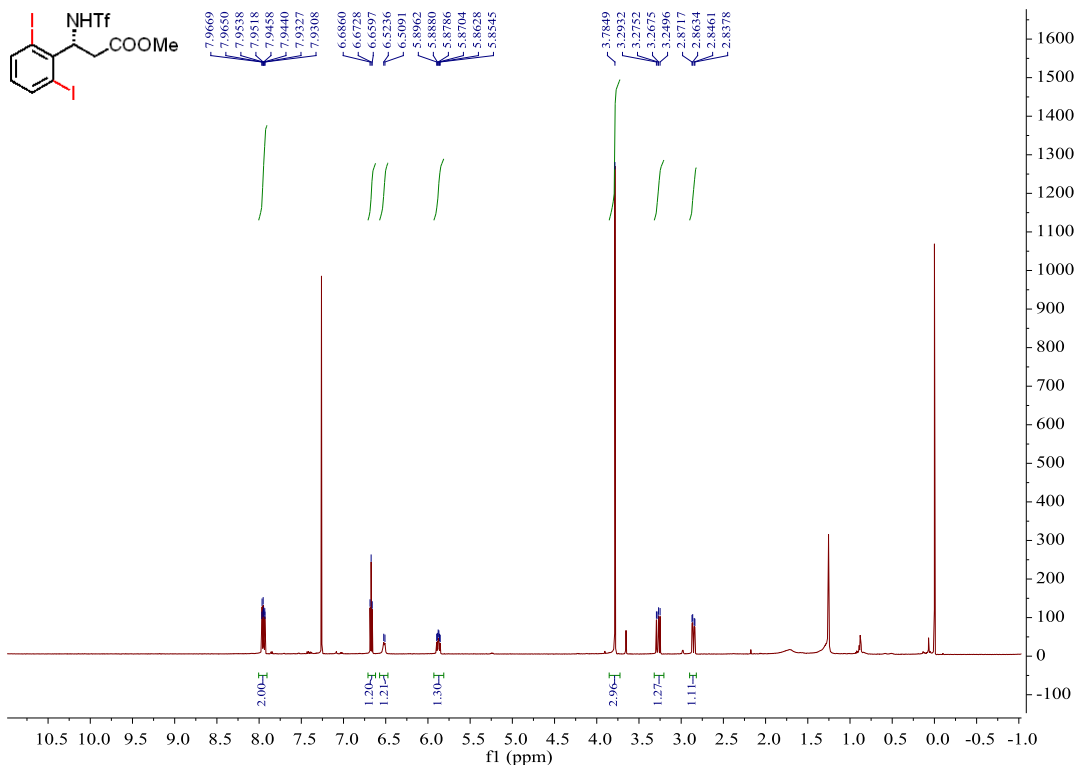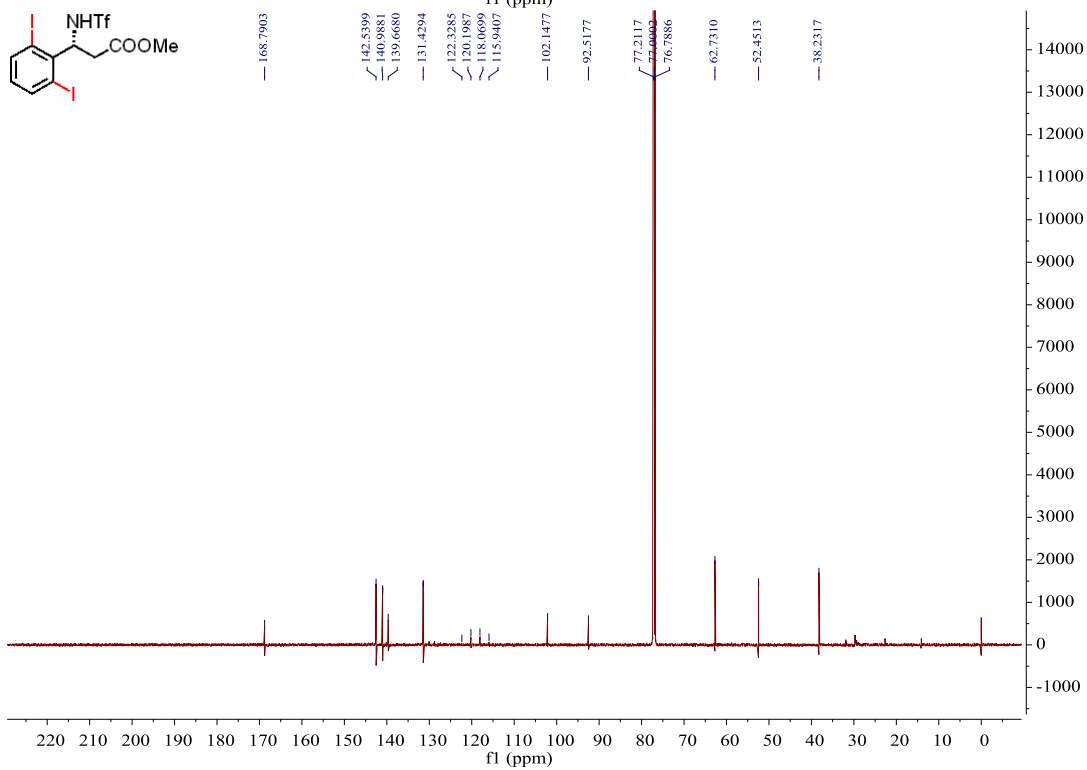



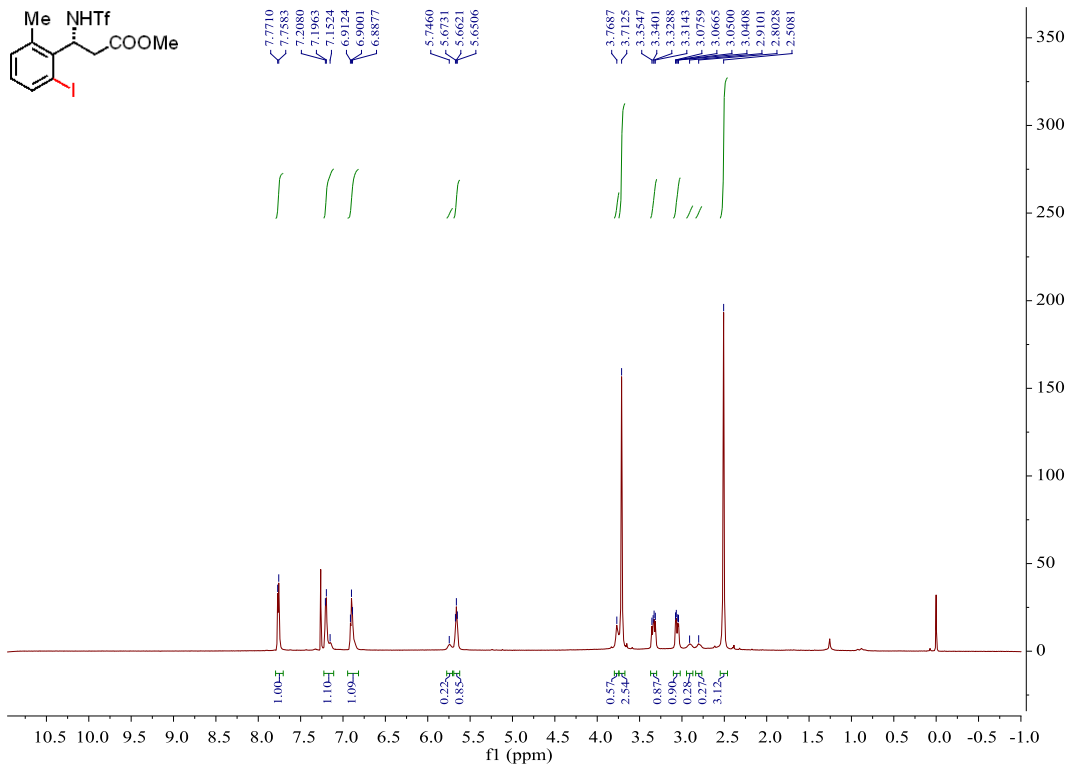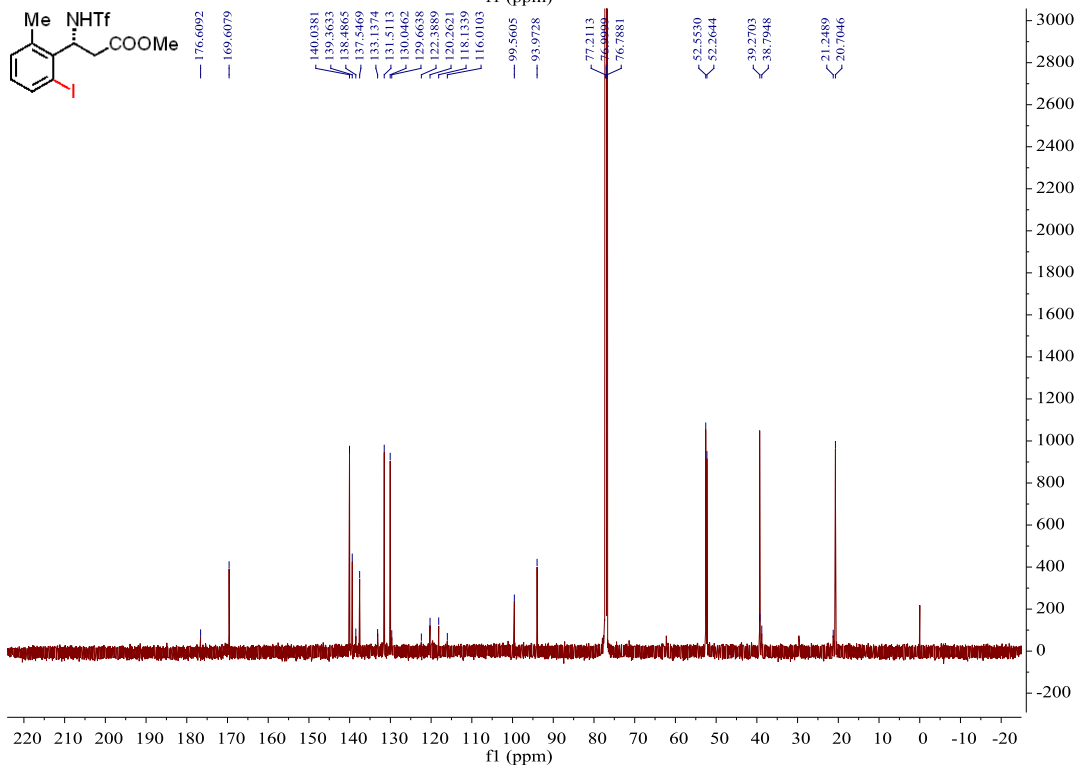

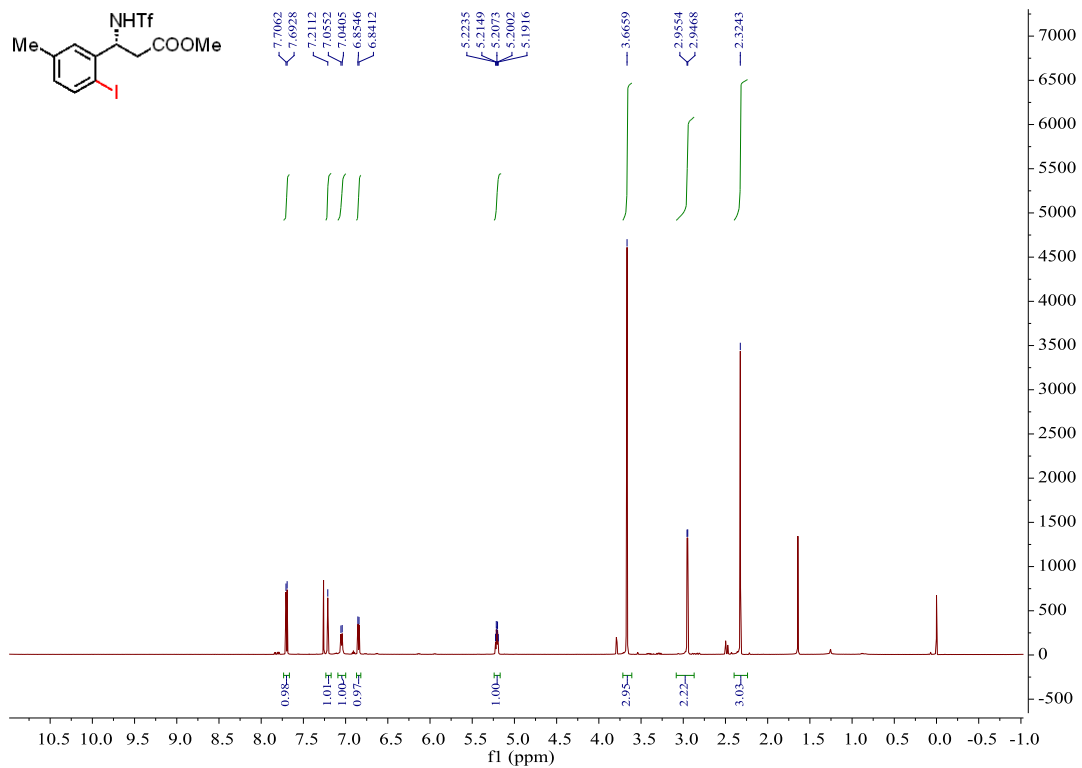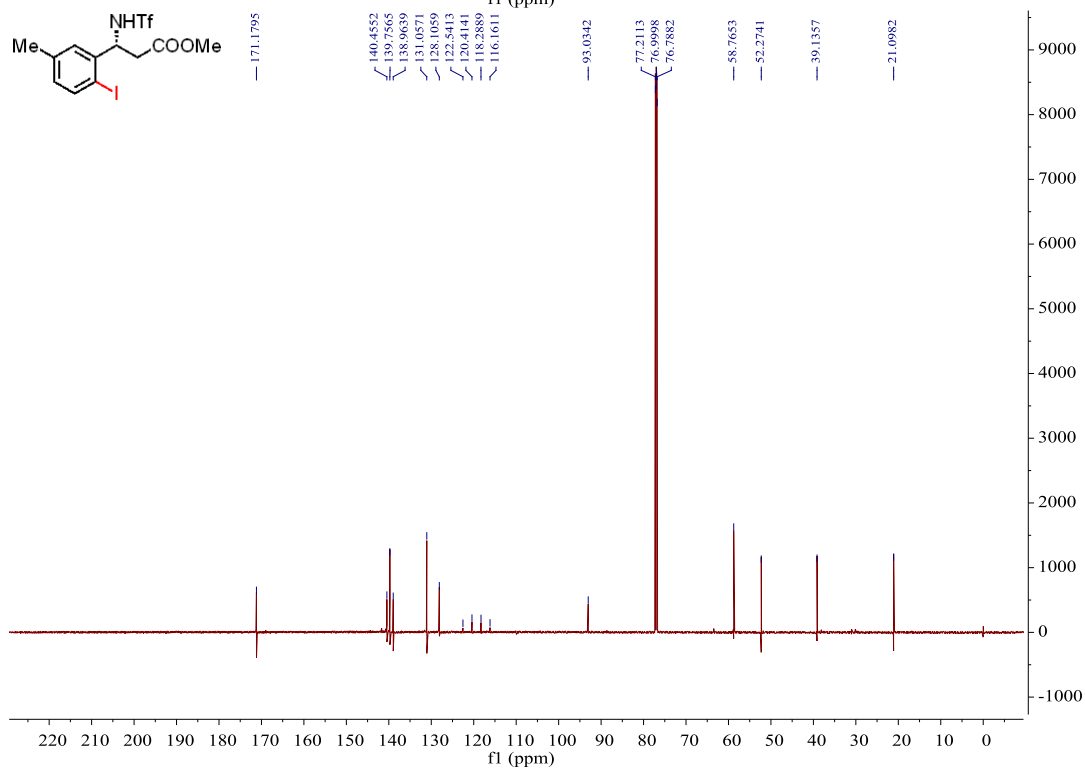

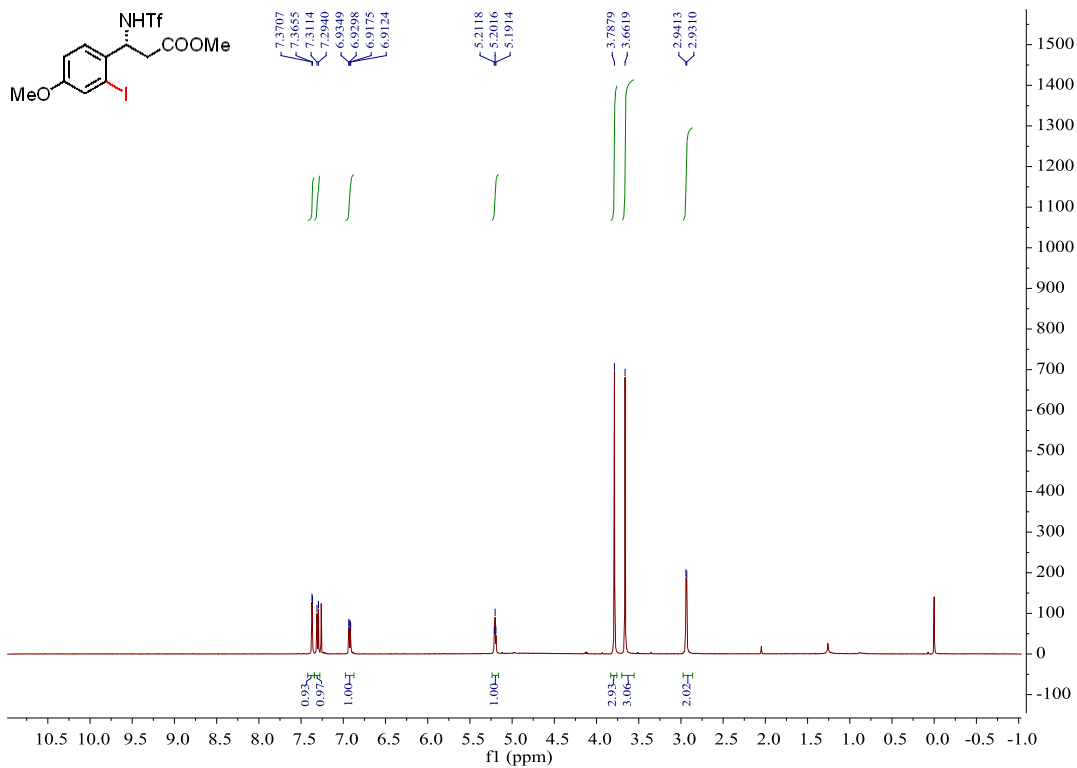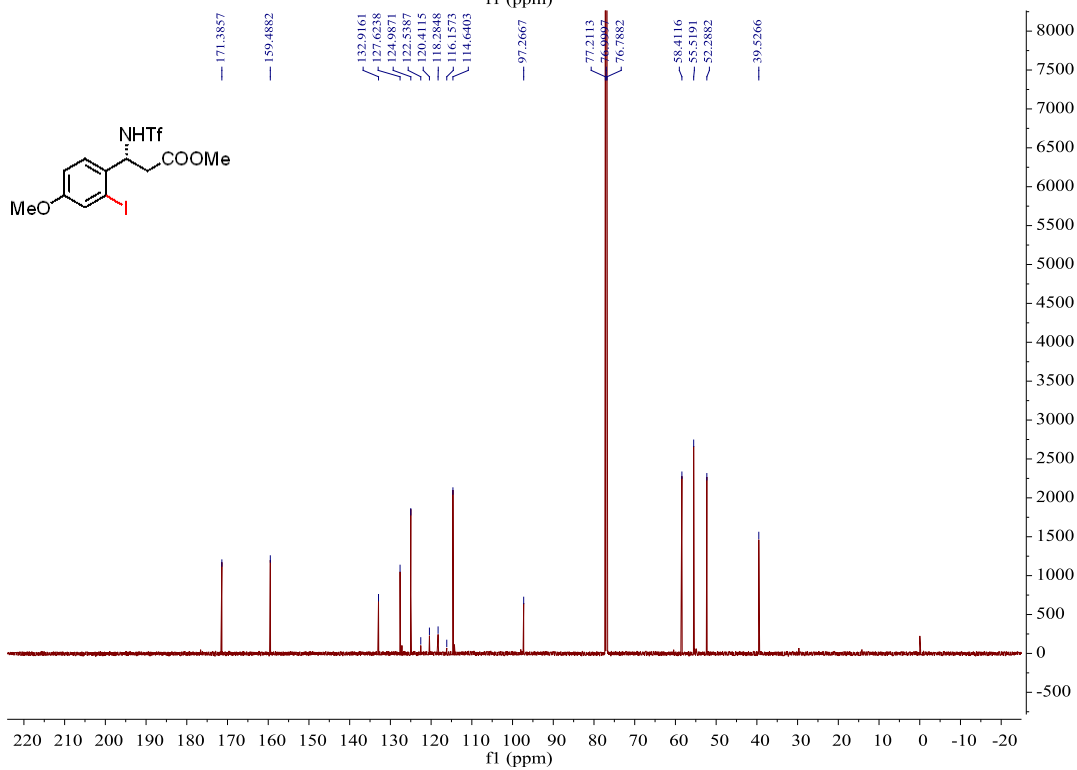

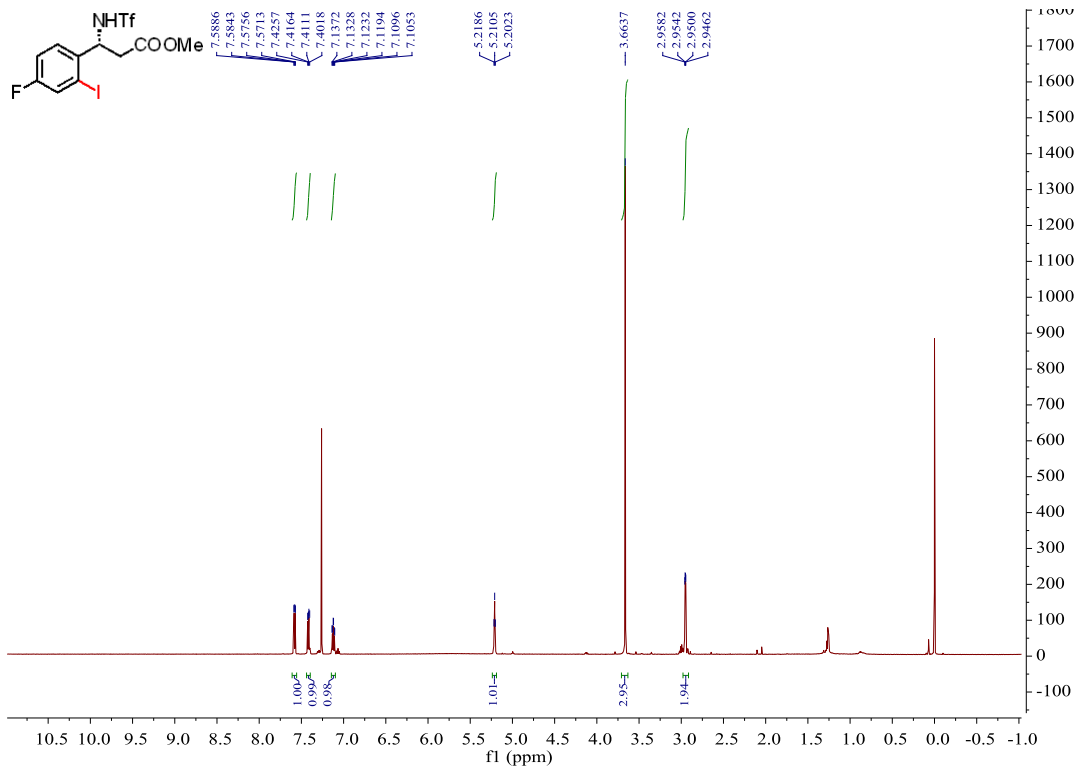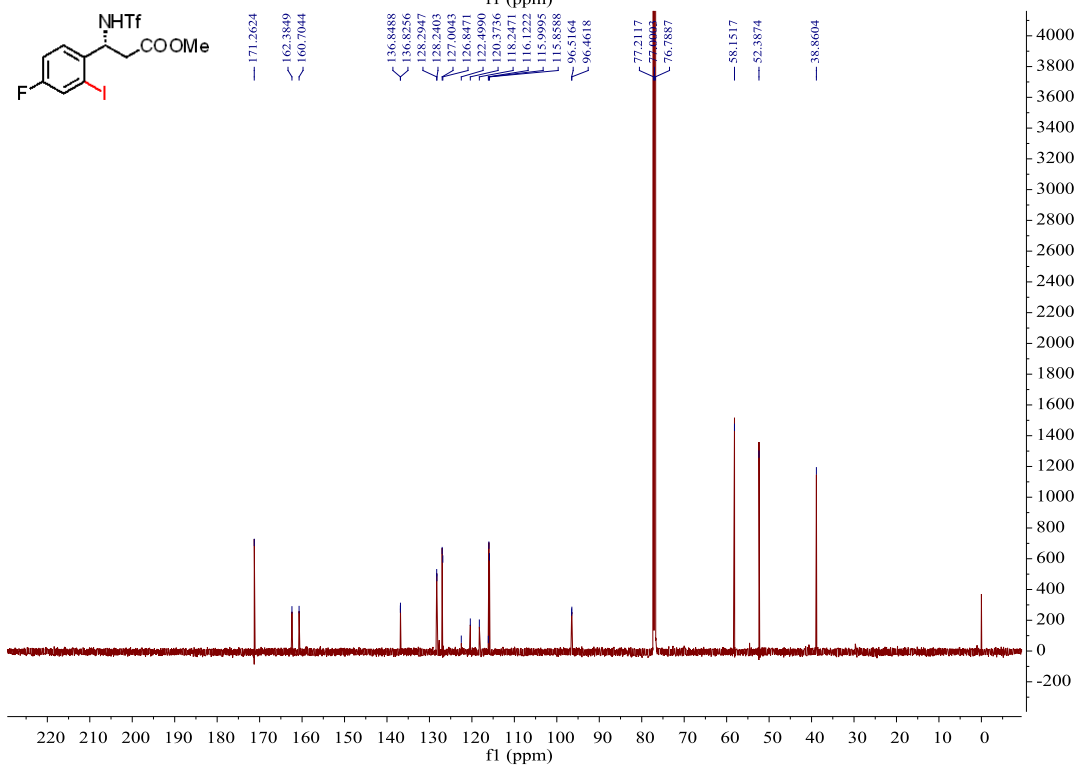

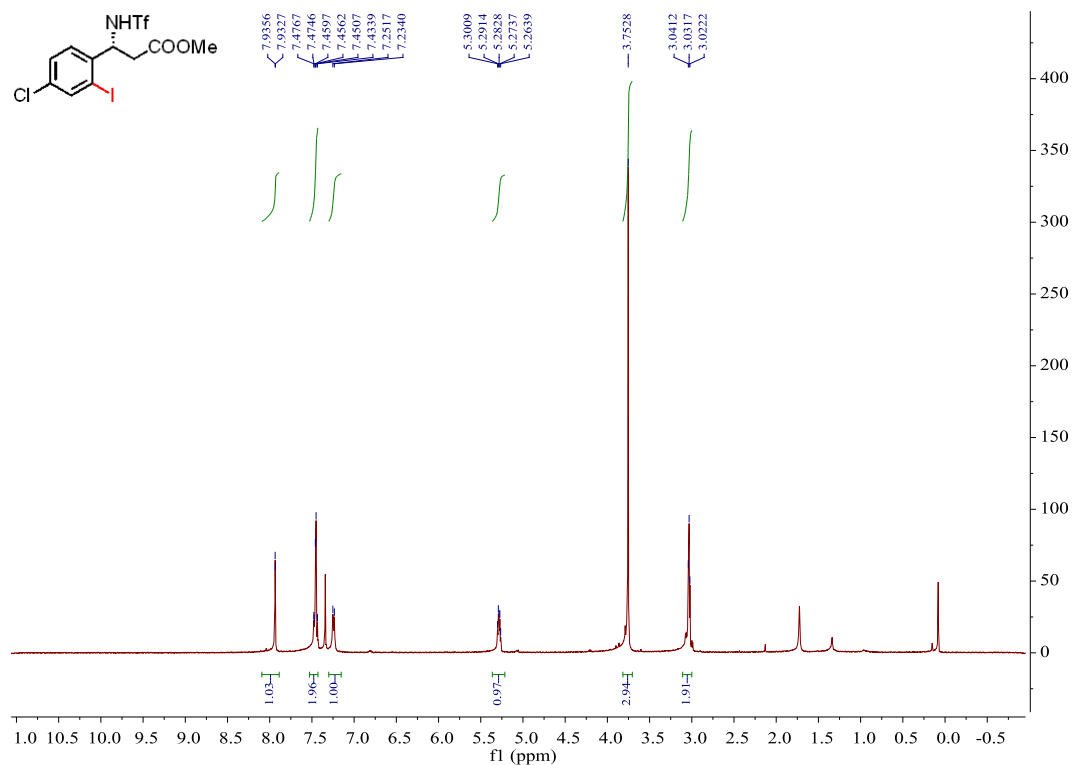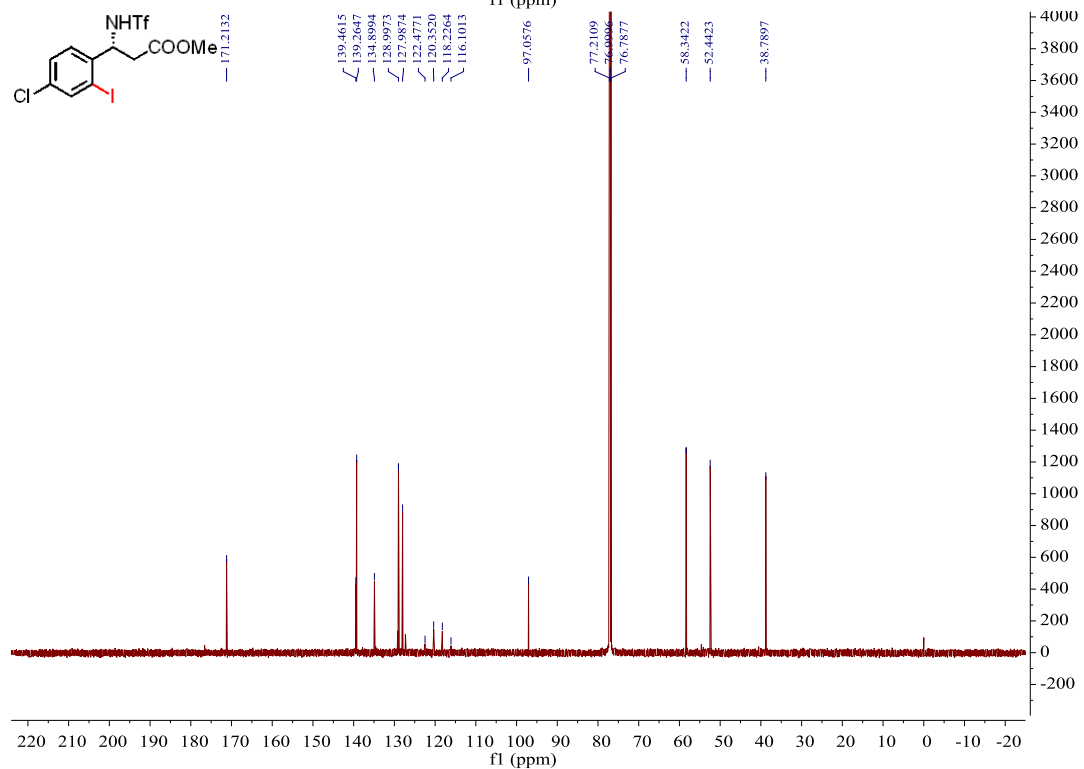

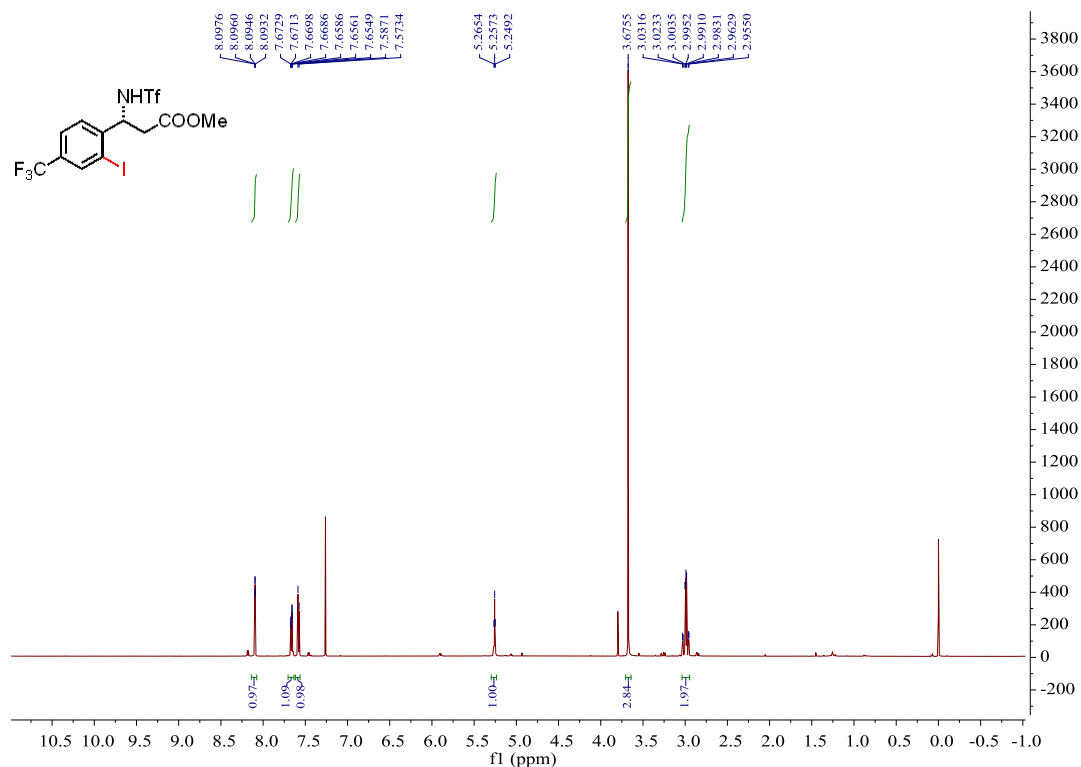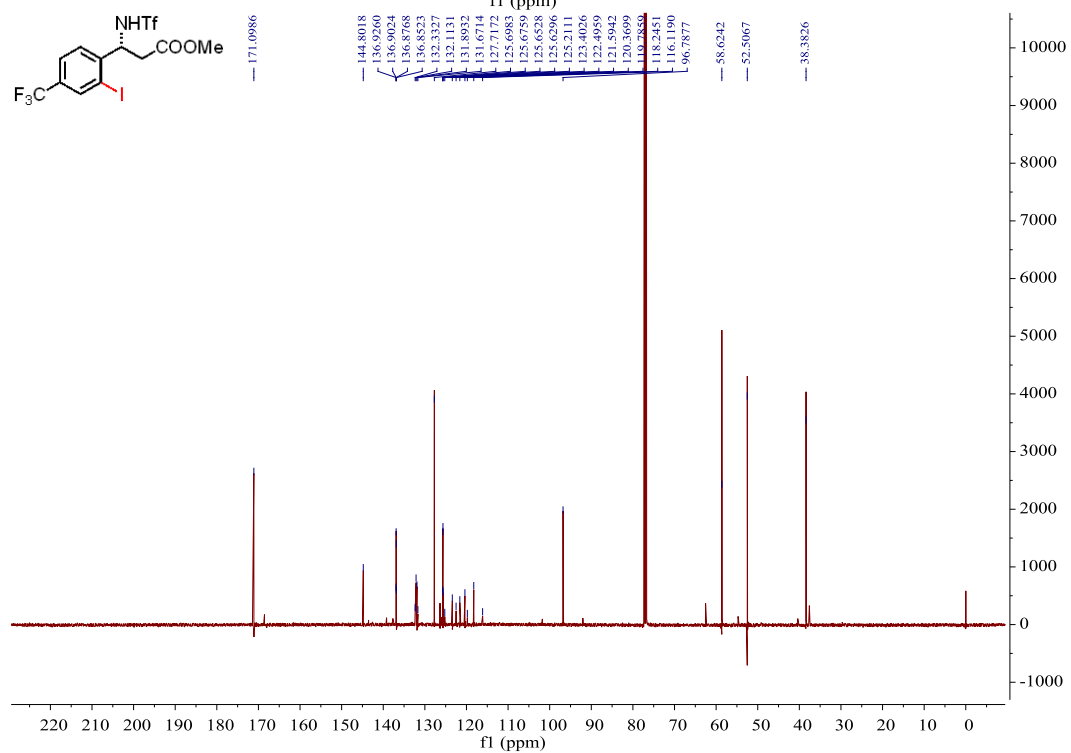

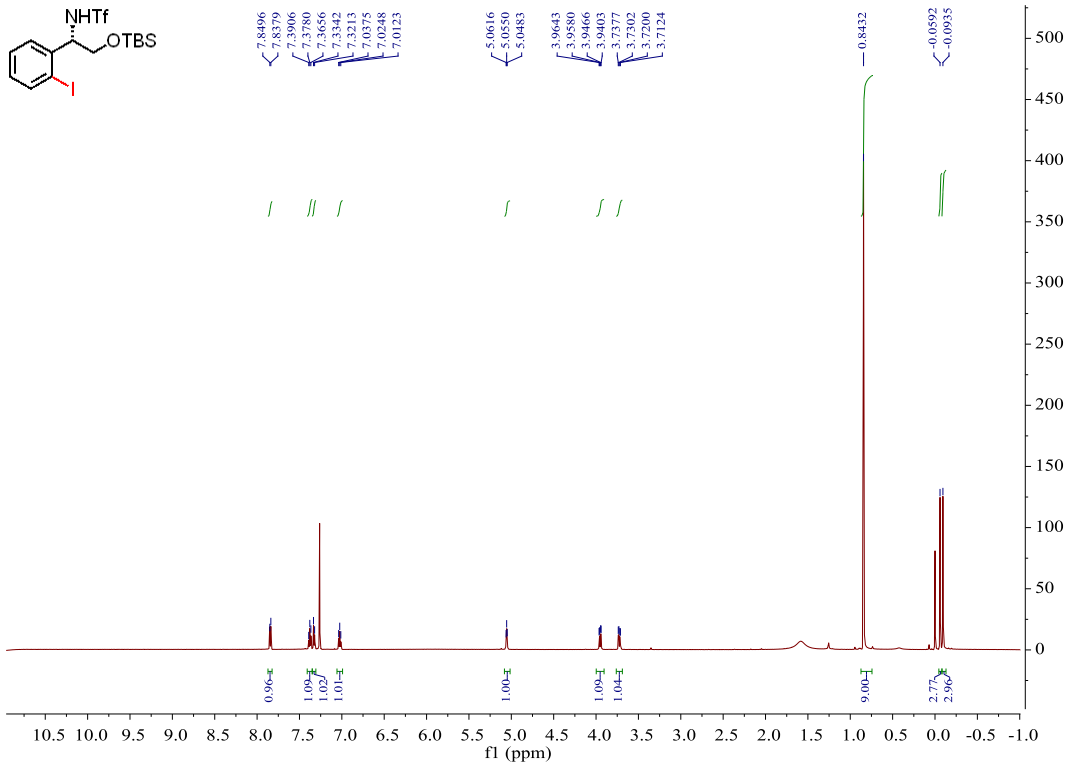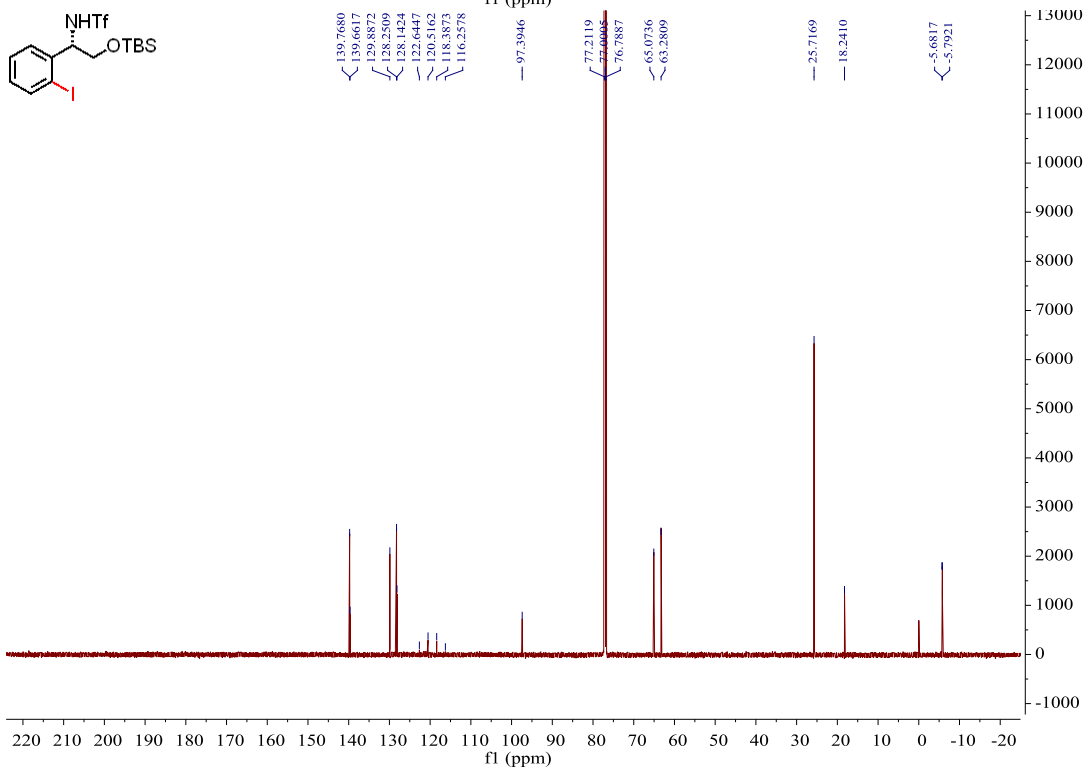

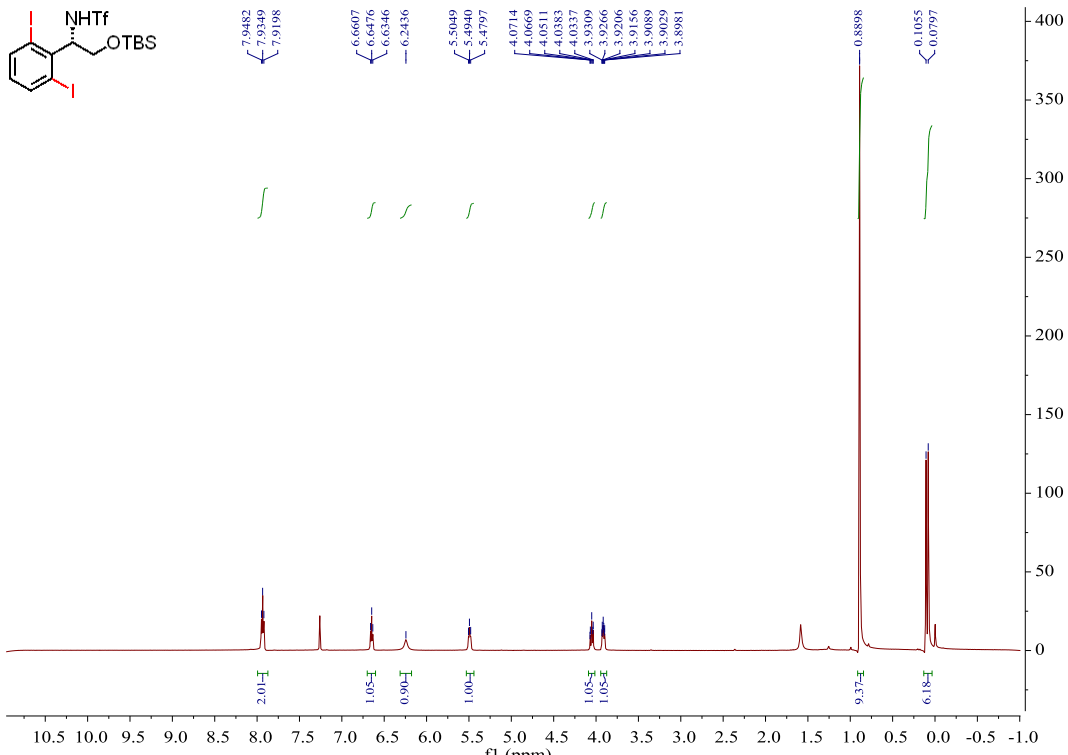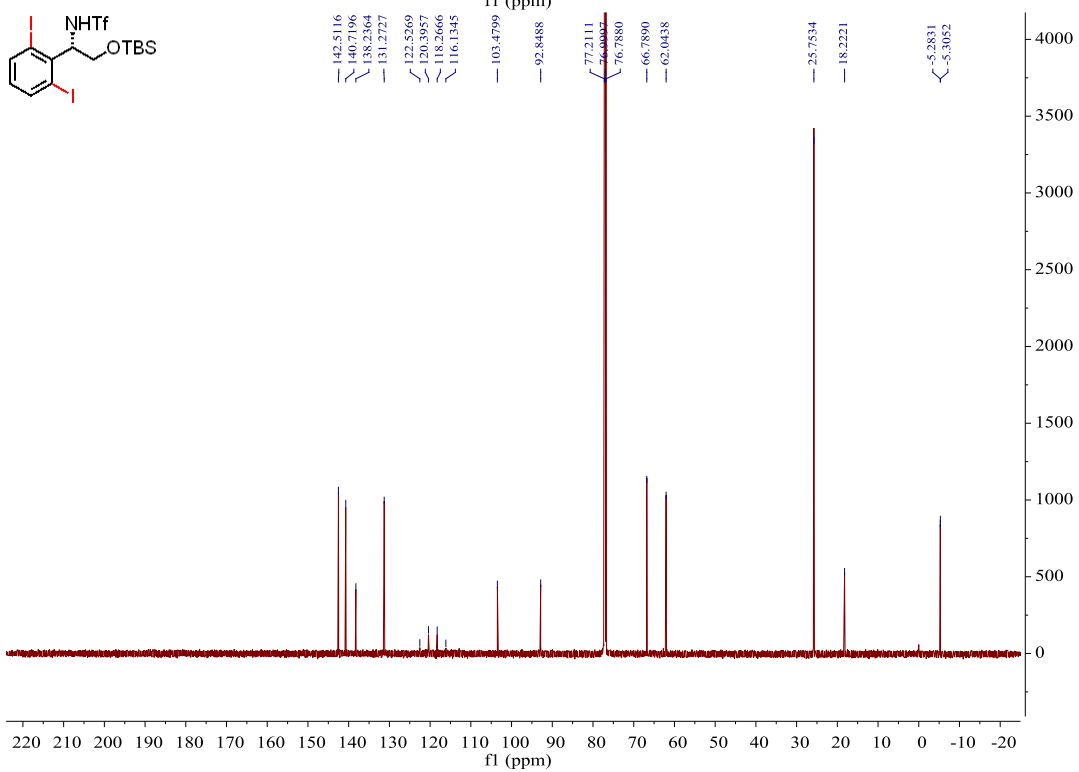



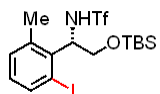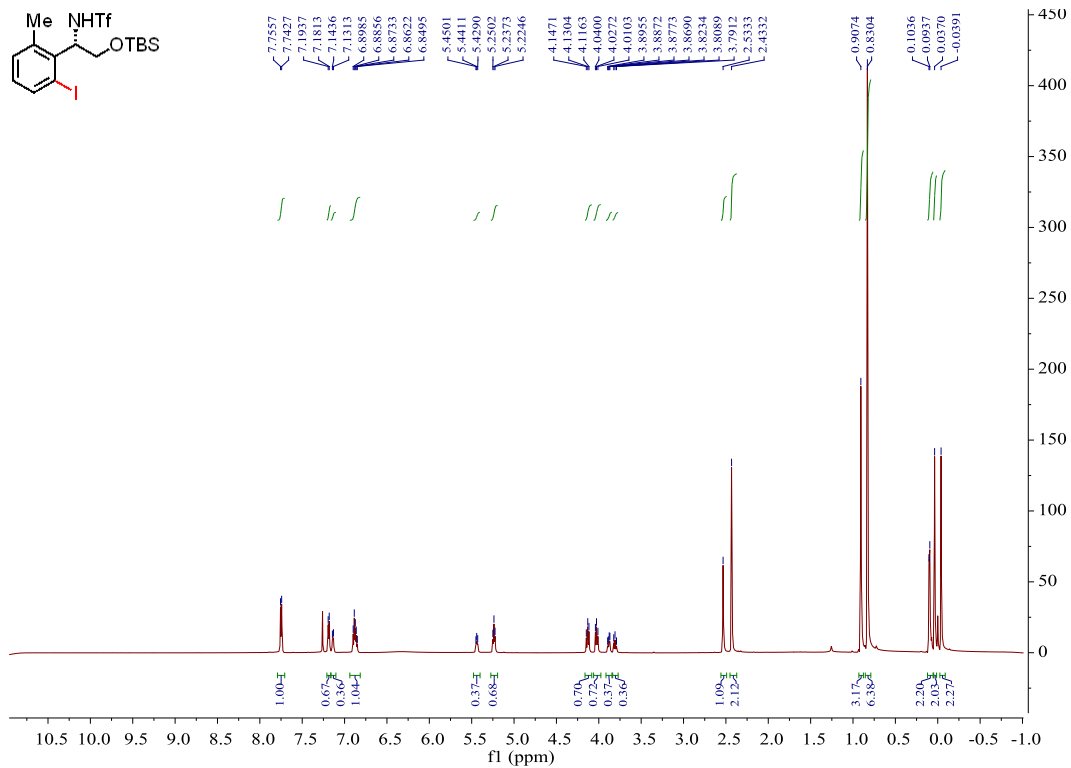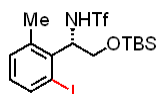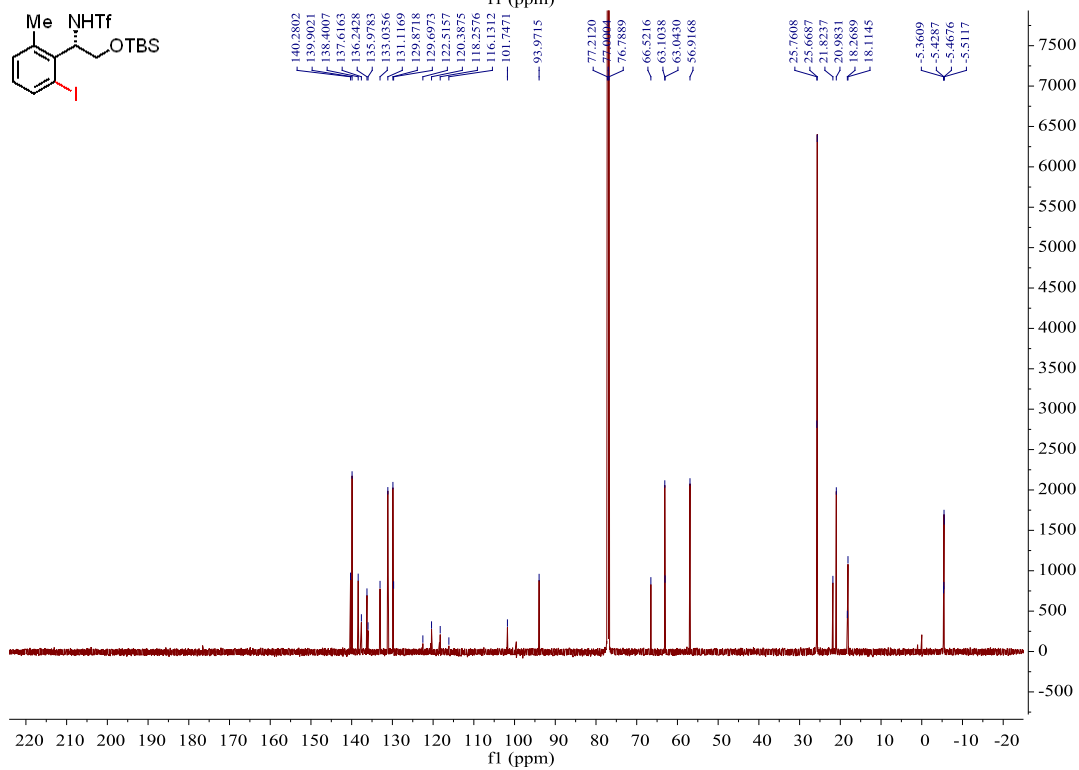

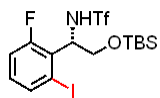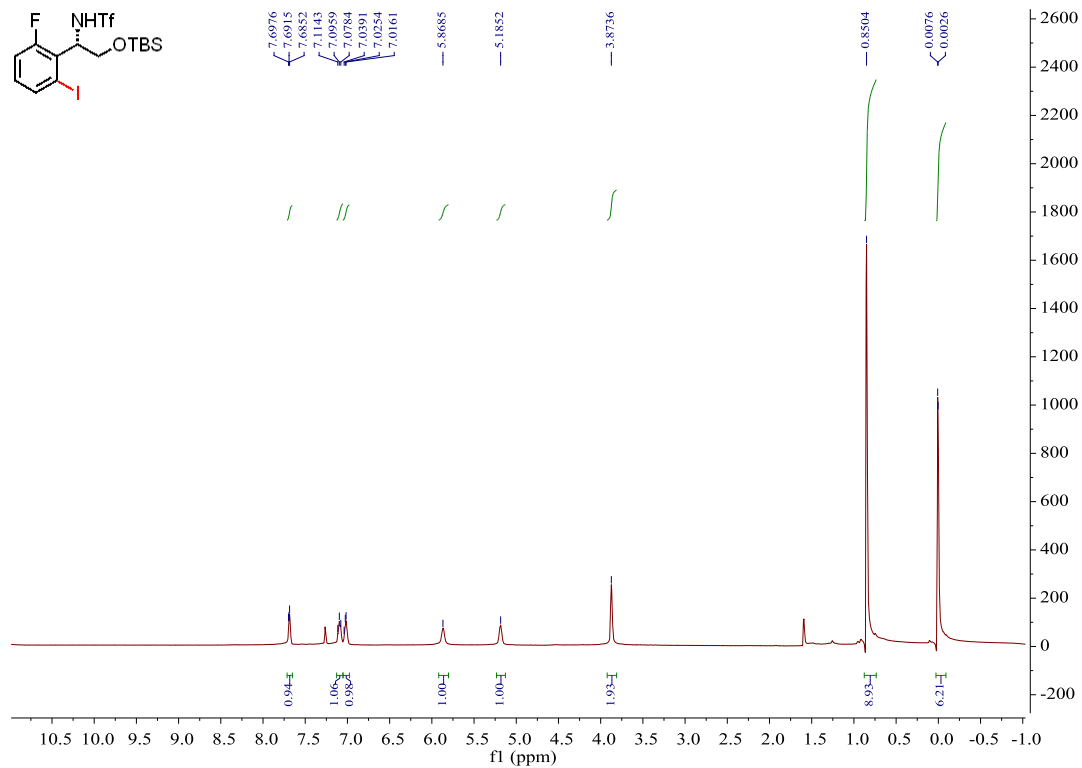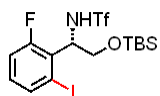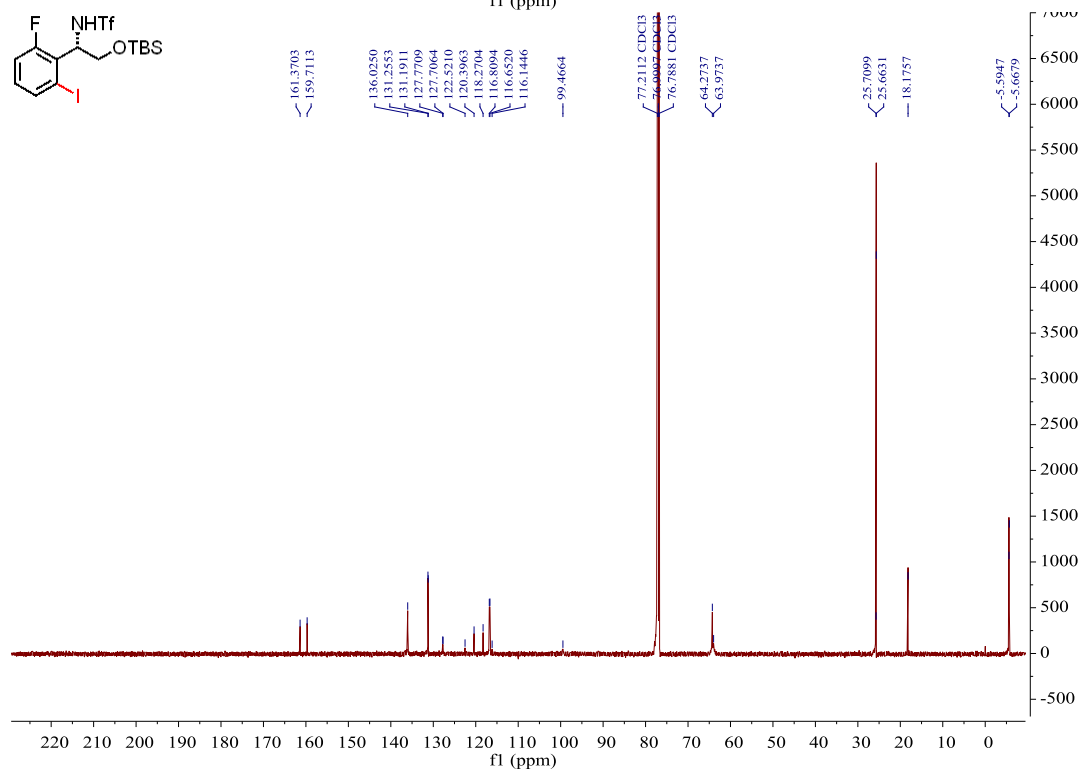

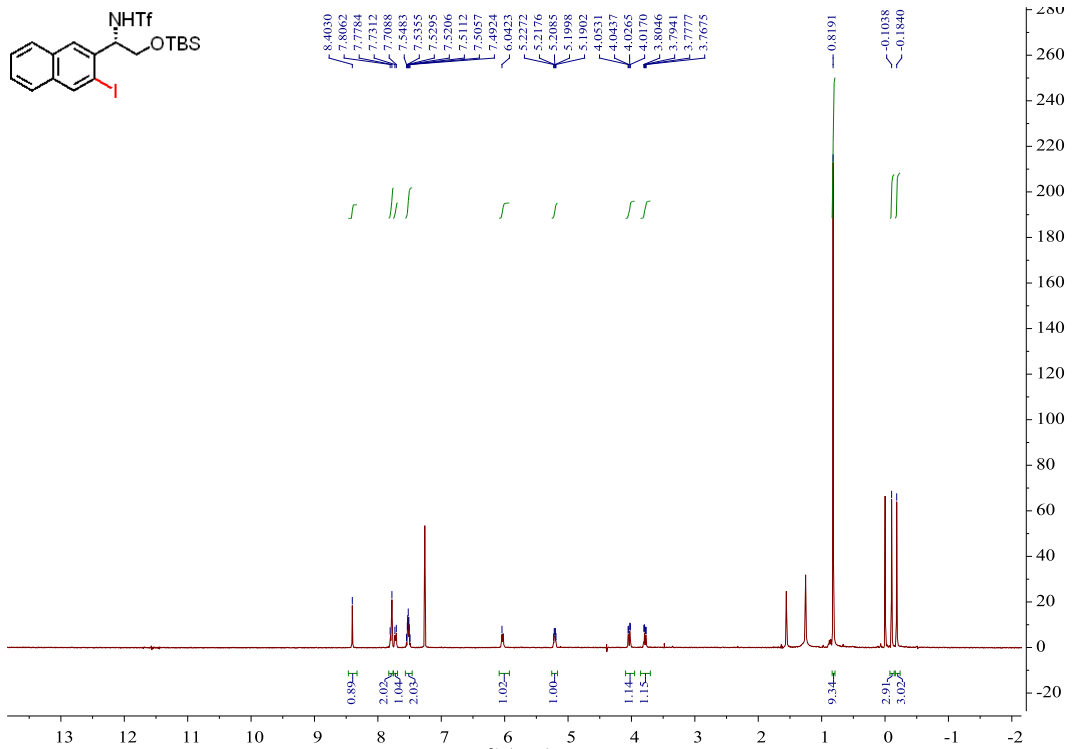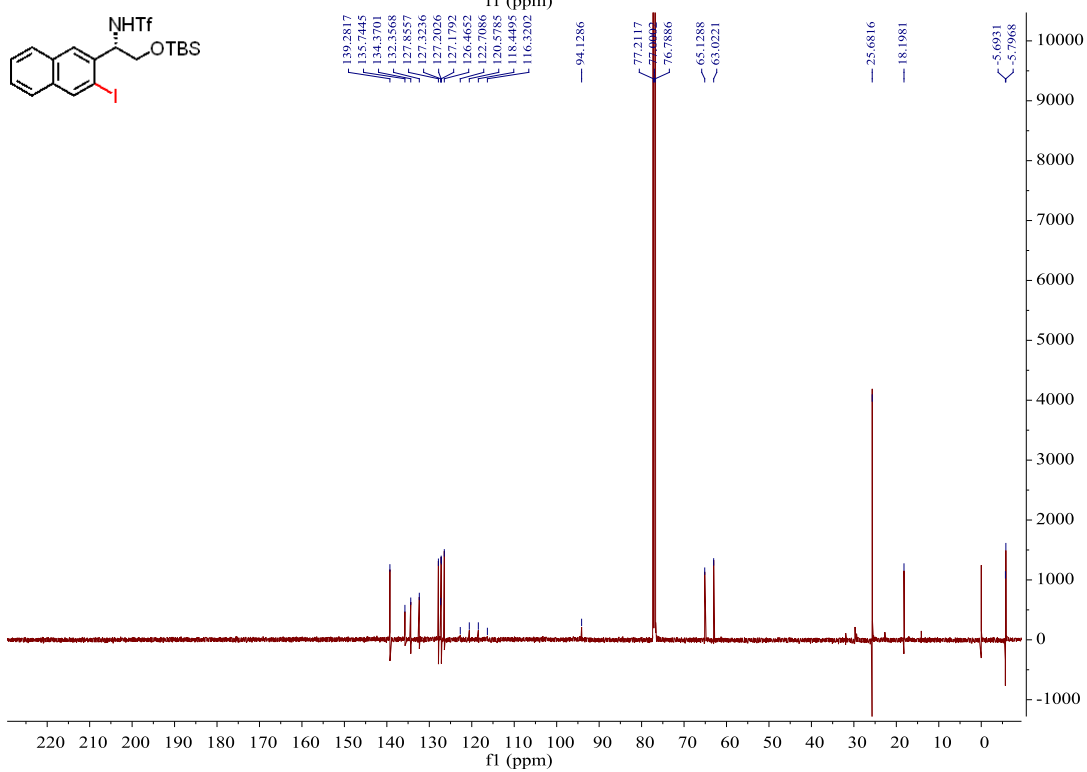

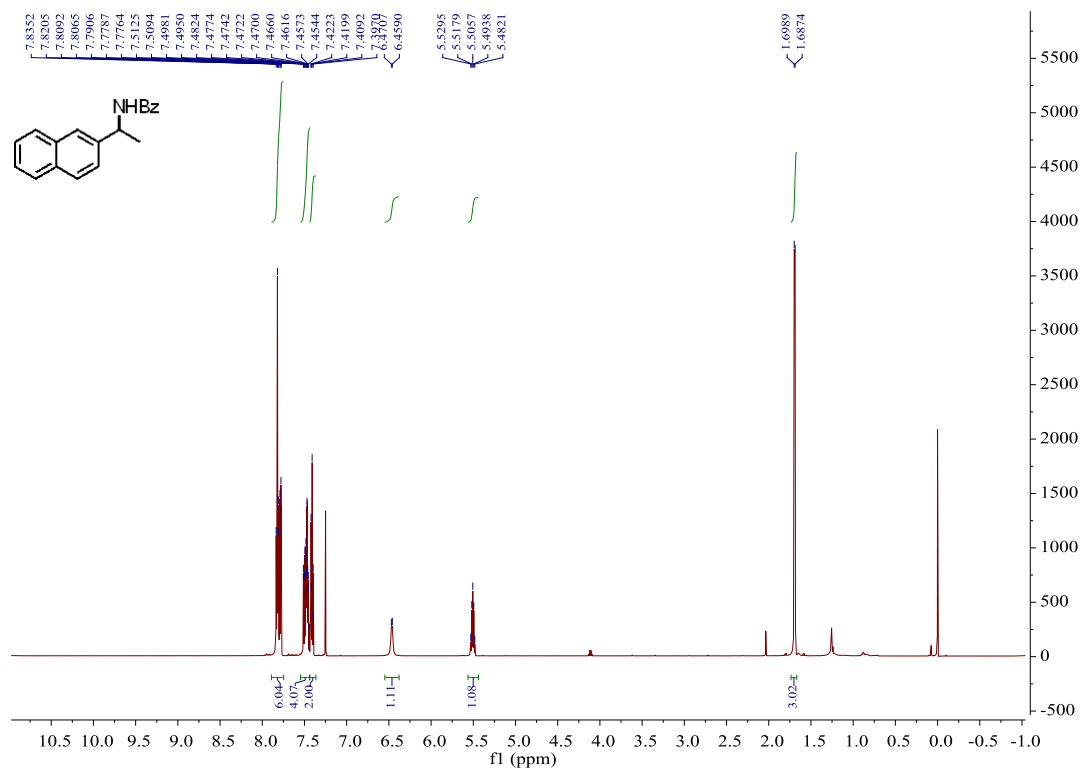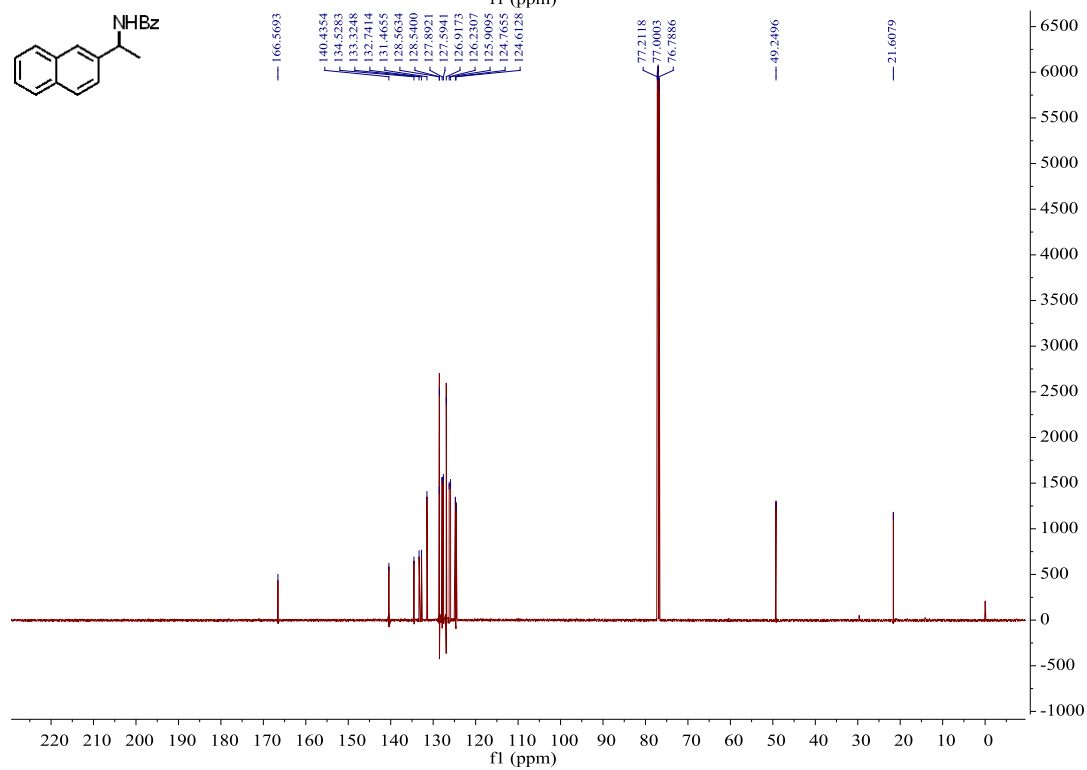

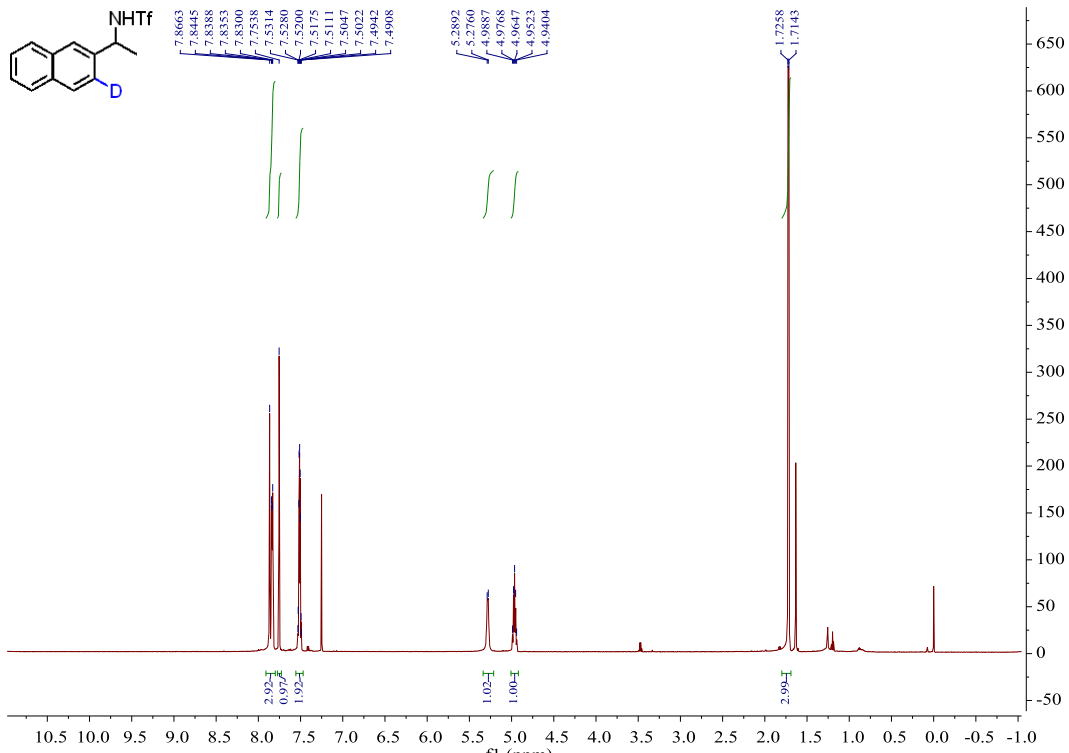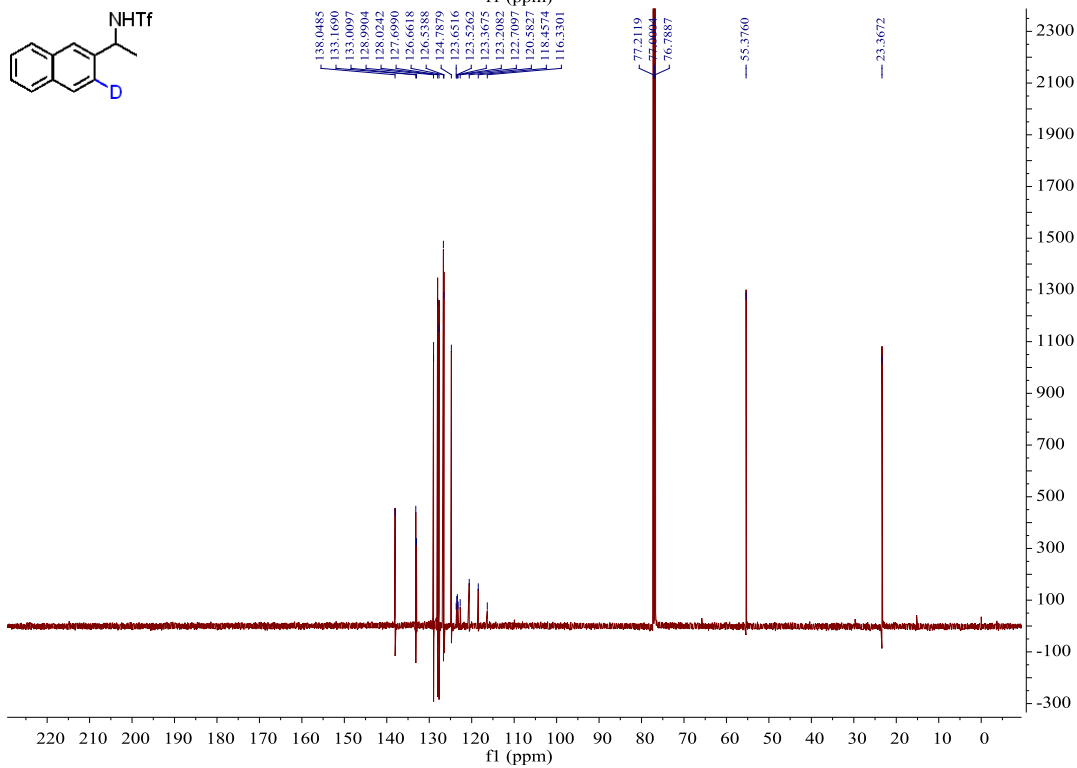

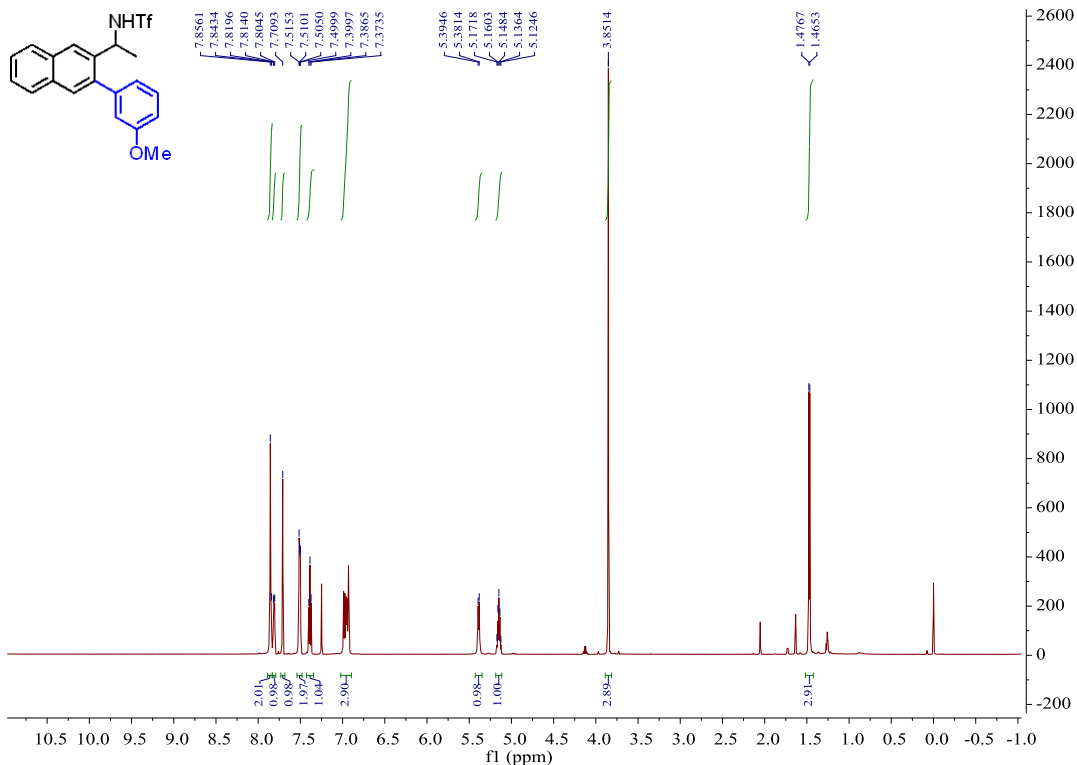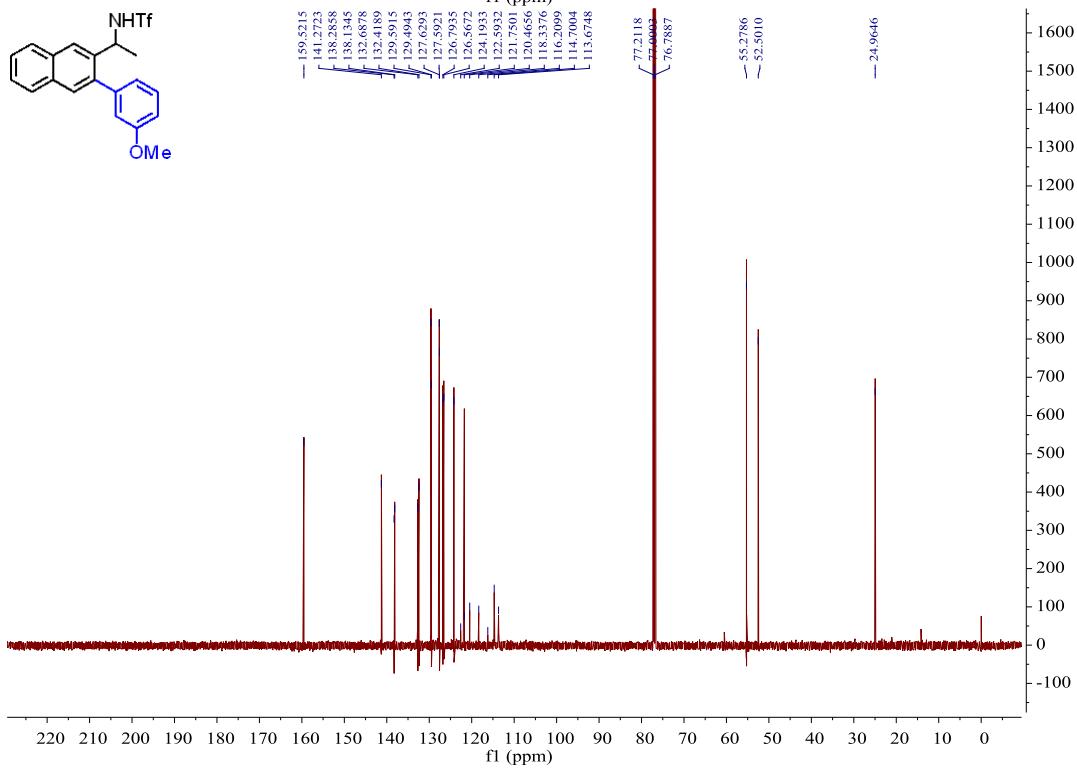

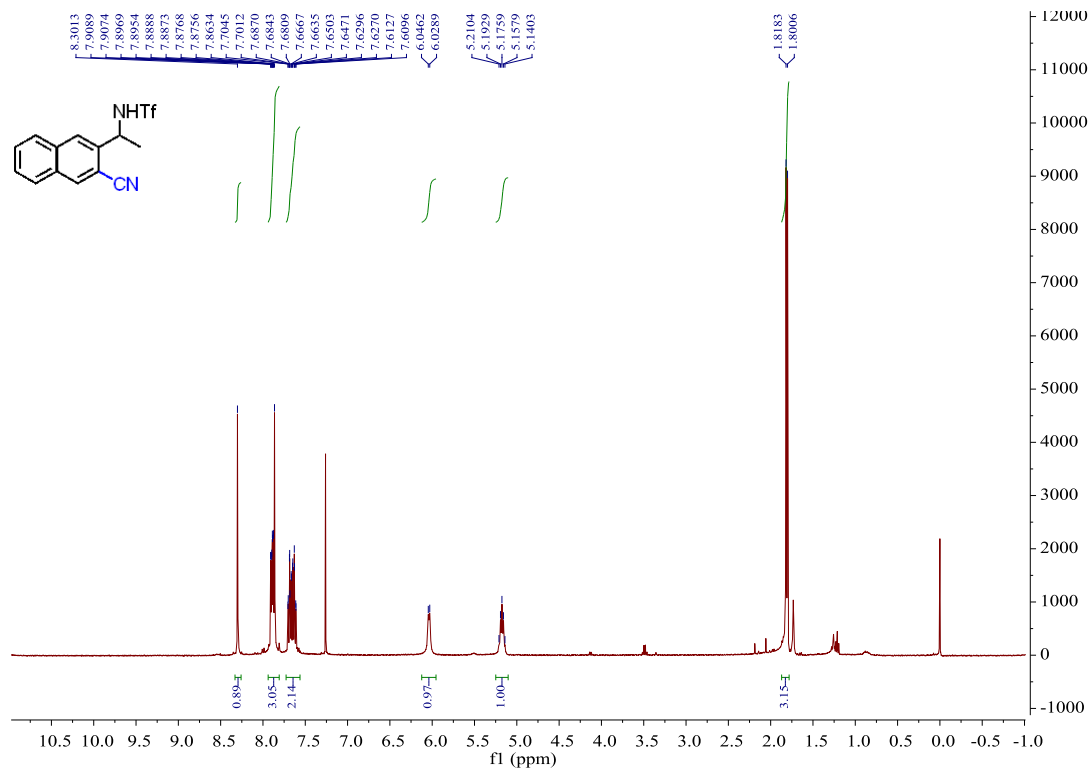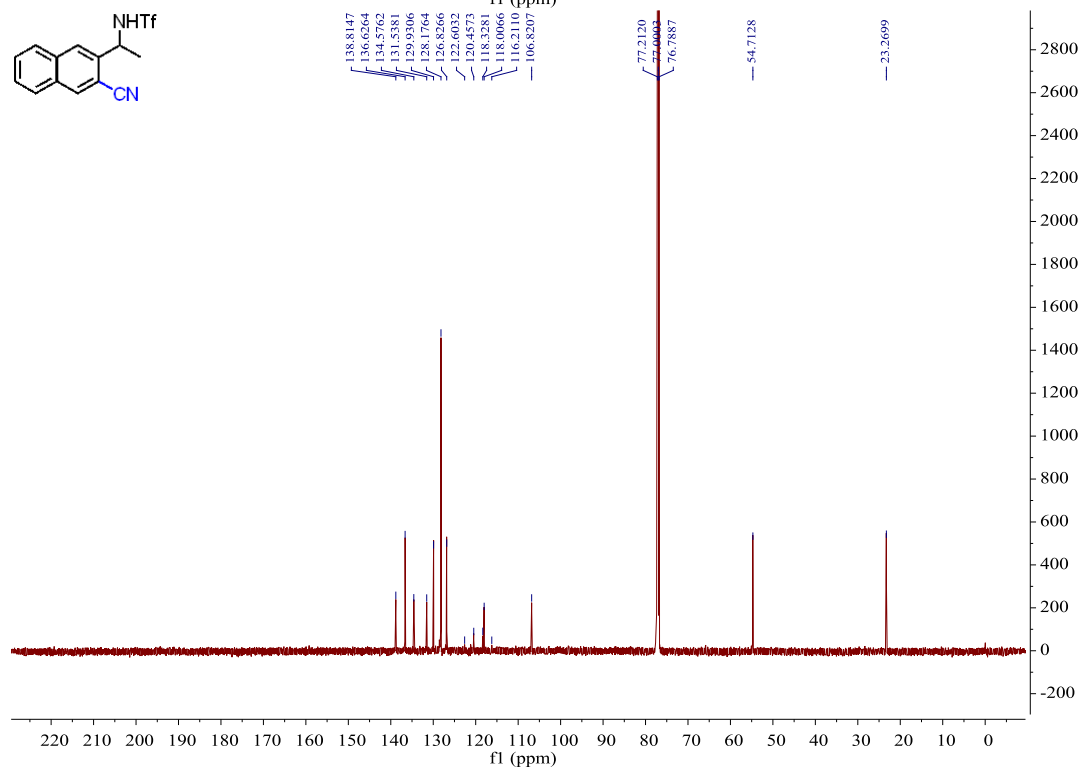

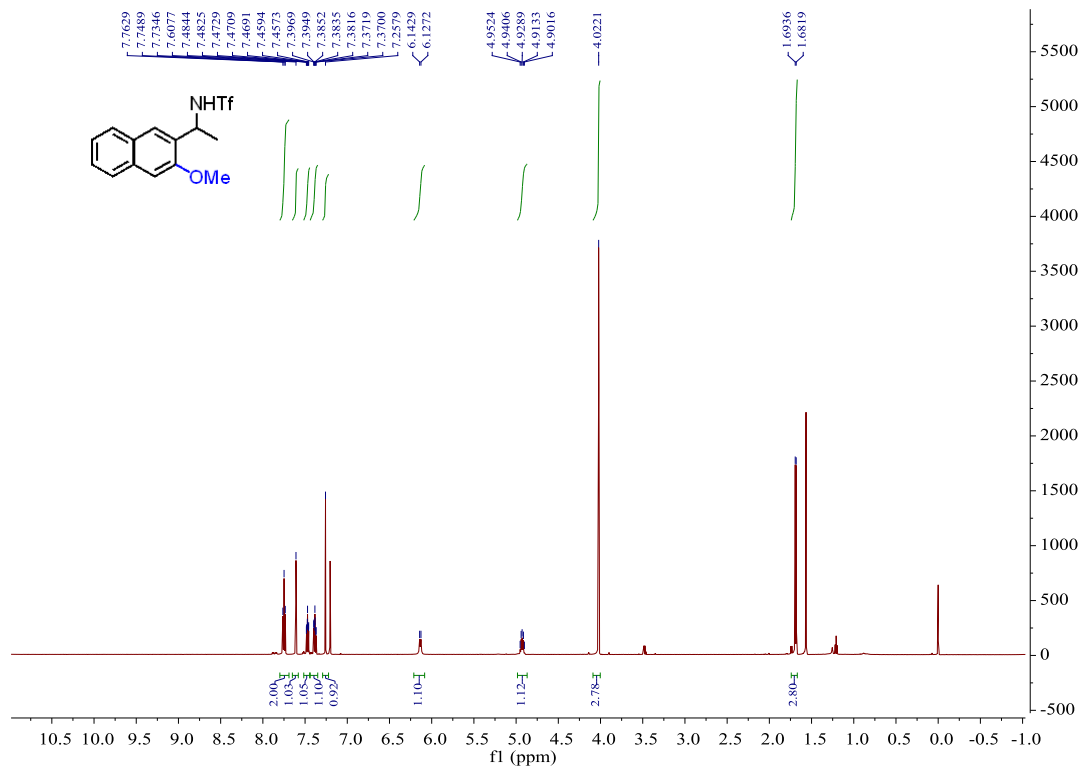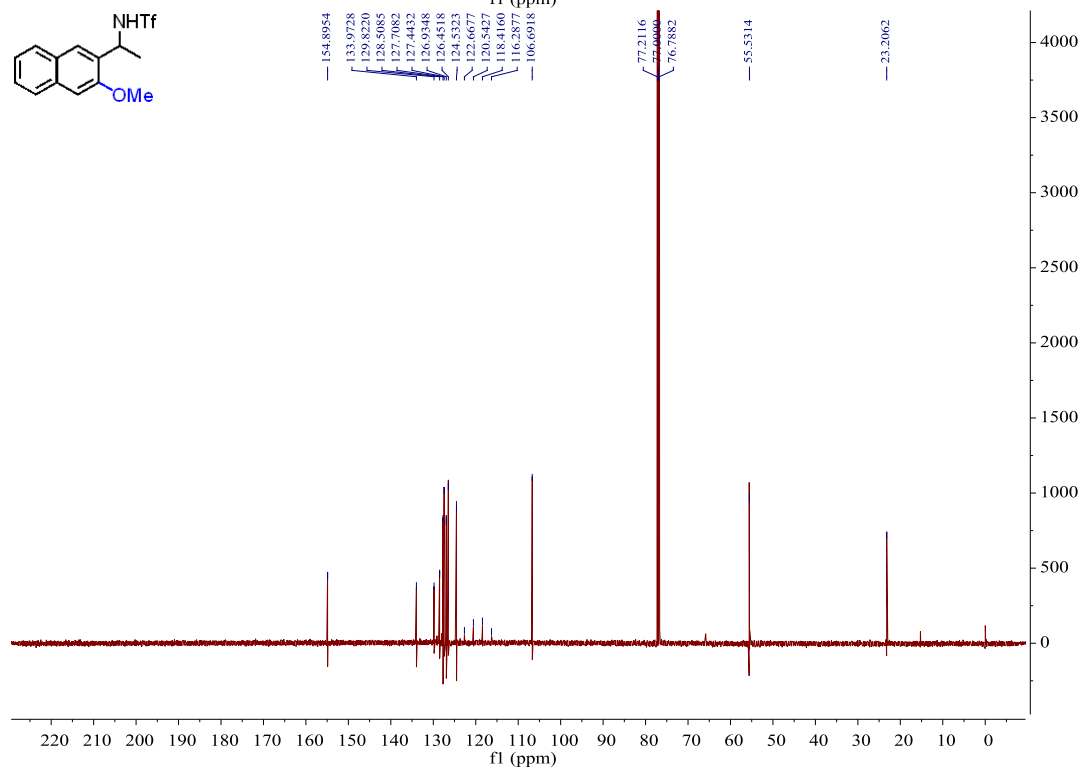



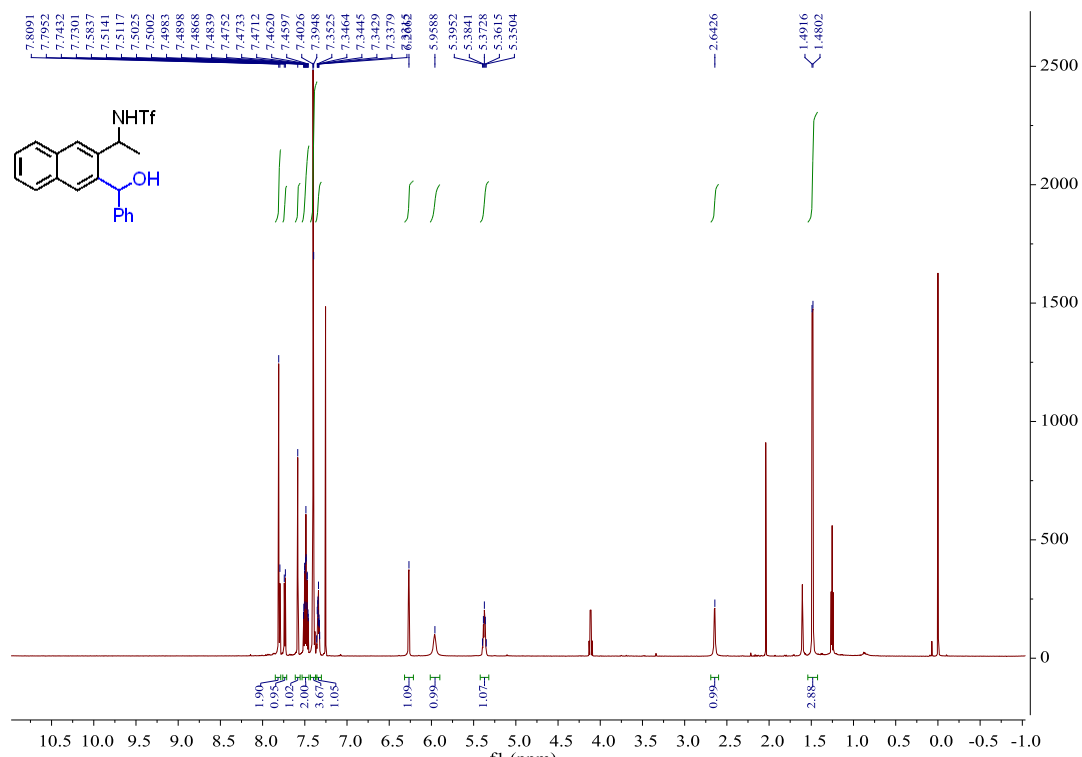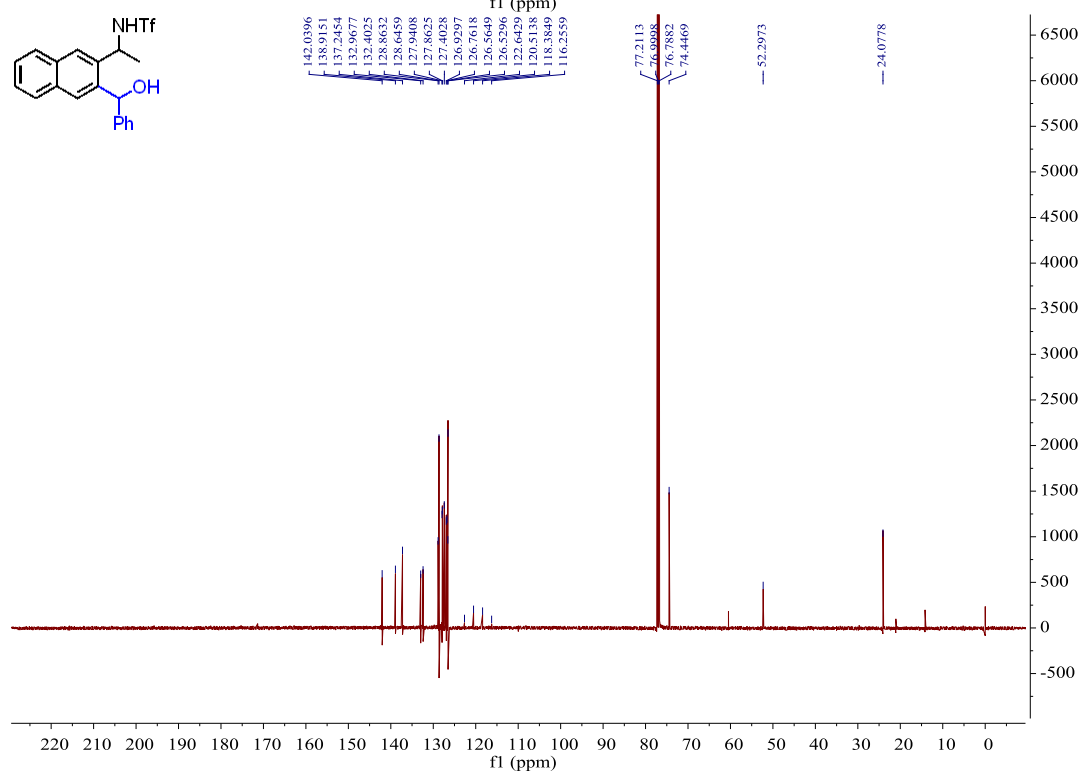

2a

Area % Report

Data File: 1a-SM-C:\Documents and Settings\Yu lab hplc\Desktop\lingchu-kinetic resolution\CL07028-SM-ee-5%-0.5mL-40min-ASH  
Method: C:\EZChrom Elite\Enterprise\Projects\Default\Method\A 120 min without fc 0.5 ml per min.met  
Acquired: 9/2/2013 4:40:02 PM  
Printed: 1/9/2014 9:17:59 PM

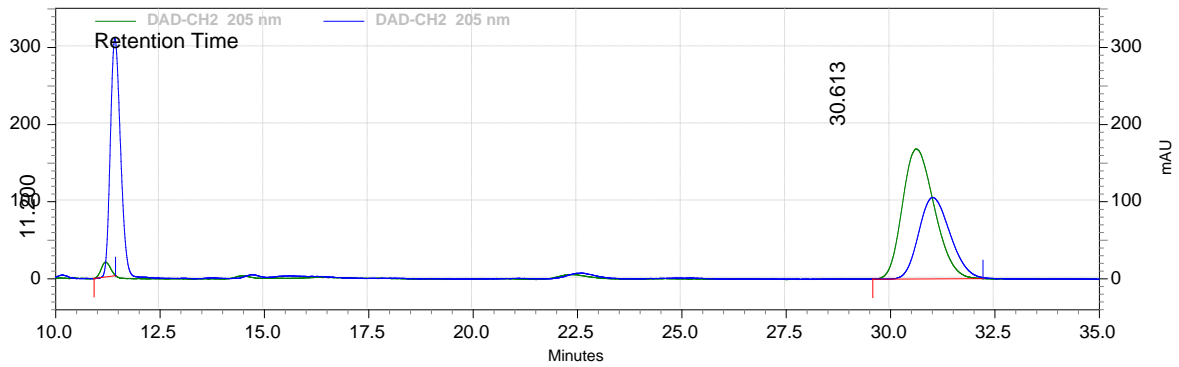

DAD-CH2 205 nm Results

| Retention Time | Area     | Area % | Height | Height % |
|----------------|----------|--------|--------|----------|
| 11.200         | 1145874  | 3.09   | 76299  | 10.17    |
| 30.613         | 35976428 | 96.91  | 674125 | 89.83    |
| Totals         | 37122302 | 100.00 | 750424 | 100.00   |

**3a**  
**Area % Report**

Data File: 1a-PR-C:\Documents and Settings\Yu lab hplc\Desktop\lingchu-kinetic  
 resolution\CL07028-PR-ee-5%-0.5mL-40min-ASH  
 Method: C:\EZChrom Elite\Enterprise\Projects\Default\Method\A 120 min without fc 0.5 ml per min.met  
 Acquired: 9/2/2013 5:21:37 PM  
 Printed: 1/9/2014 9:21:36 PM

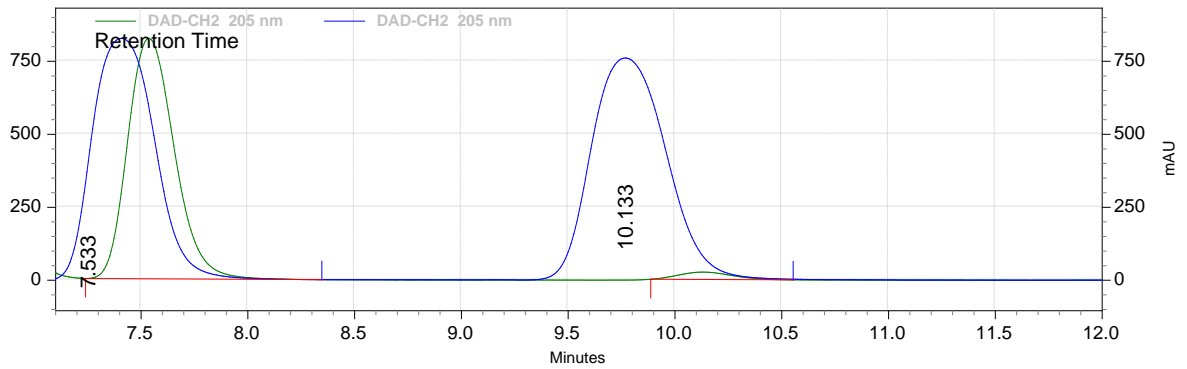

**DAD-CH2 205 nm Results**

| Retention Time | Area            | Area %        | Height         | Height %      |
|----------------|-----------------|---------------|----------------|---------------|
| 7.533          | 50036964        | 96.61         | 3294342        | 97.02         |
| 10.133         | 1753692         | 3.39          | 101221         | 2.98          |
| <b>Totals</b>  | <b>51790656</b> | <b>100.00</b> | <b>3395563</b> | <b>100.00</b> |

**2b**

**Area % Report**

Data File: 1b-SM-C:\Documents and Settings\Yu lab hplc\Desktop\lingchu-kinetic resolution\CL07026-SM-ee-5%-0.5mL-20min-ASH  
Method: C:\EZChrom Elite\Enterprise\Projects\Default\Method\A 120 min without fc 0.5 ml per min.met  
Acquired: 9/2/2013 12:48:50 PM  
Printed: 1/9/2014 9:26:15 PM

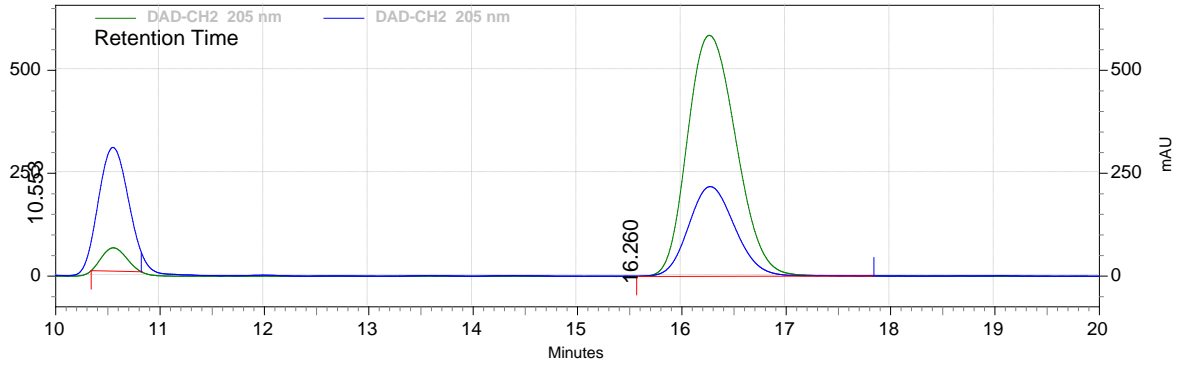

**DAD-CH2 205 nm Results**

| Retention Time | Area     | Area % | Height  | Height % |
|----------------|----------|--------|---------|----------|
| 10.553         | 3593116  | 4.51   | 226860  | 8.83     |
| 16.260         | 76022434 | 95.49  | 2341695 | 91.17    |
| Totals         | 79615550 | 100.00 | 2568555 | 100.00   |

**3b**  
**Area % Report**

Data File: 1b-PR-C:\Documents and Settings\Yu lab hplc\Desktop\lingchu-kinetic  
 resolution\CL07026-PR-ee-5%-0.5mL-20min-ASH  
 Method: C:\EZChrom Elite\Enterprise\Projects\Default\Method\A 120 min without fc 0.5 ml per min.met  
 Acquired: 9/2/2013 1:31:36 PM  
 Printed: 1/9/2014 9:29:42 PM

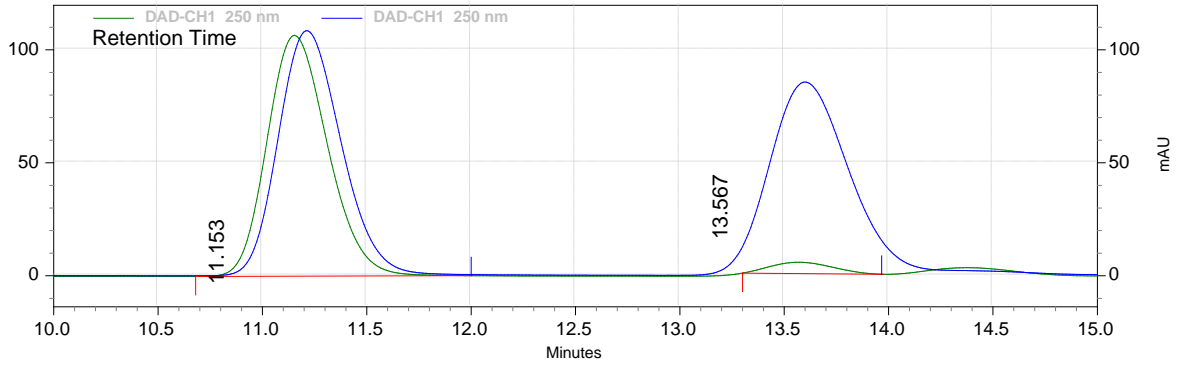

**DAD-CH1 250 nm Results**

| Retention Time | Area    | Area % | Height | Height % |
|----------------|---------|--------|--------|----------|
| 11.153         | 8587300 | 95.40  | 426316 | 95.51    |
| 13.567         | 414327  | 4.60   | 20051  | 4.49     |

|        |         |        |        |        |
|--------|---------|--------|--------|--------|
| Totals | 9001627 | 100.00 | 446367 | 100.00 |
|--------|---------|--------|--------|--------|

2c

Area % Report

Data File: 1c-SM-C:\Documents and Settings\Yu lab hplc\Desktop\lingchu-kinetic resolution\CL07024-SM-ee-5%-0.5mL-20min-ASH  
Method: C:\EZChrom Elite\Enterprise\Projects\Default\Method\A 120 min without fc 0.5 ml per min.met  
Acquired: 9/2/2013 2:14:19 PM  
Printed: 1/9/2014 9:32:42 PM

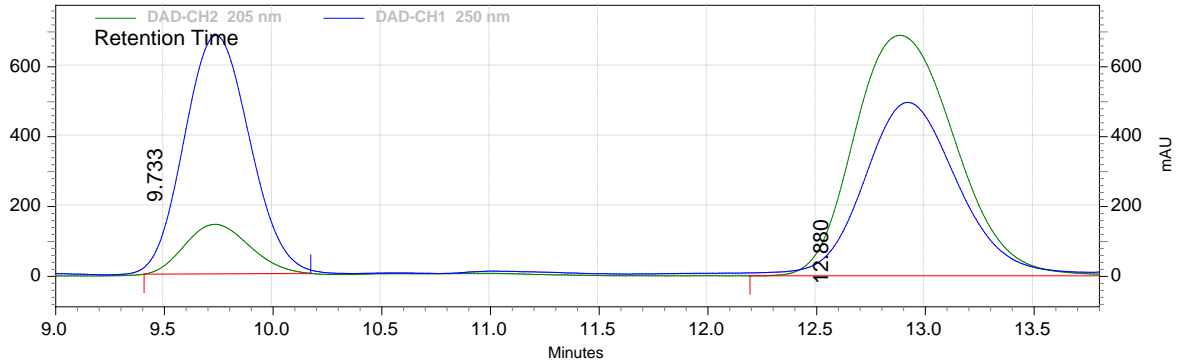

DAD-CH2 205 nm Results

| Retention Time | Area      | Area % | Height  | Height % |
|----------------|-----------|--------|---------|----------|
| 9.733          | 11711510  | 11.63  | 566571  | 17.06    |
| 12.880         | 89015576  | 88.37  | 2753515 | 82.94    |
| Totals         | 100727086 | 100.00 | 3320086 | 100.00   |

**3c**

**Area % Report**

Data File: 1c-PR-C:\Documents and Settings\Yu lab hplc\Desktop\lingchu-kinetic resolution\CL07024-PR-ee-5%-0.3mL-40min-ASH  
Method: C:\EZChrom Elite\Enterprise\Projects\Default\Method\A 120 min without fc 0.5 ml per min.met  
Acquired: 9/2/2013 3:17:06 PM  
Printed: 1/9/2014 9:36:01 PM

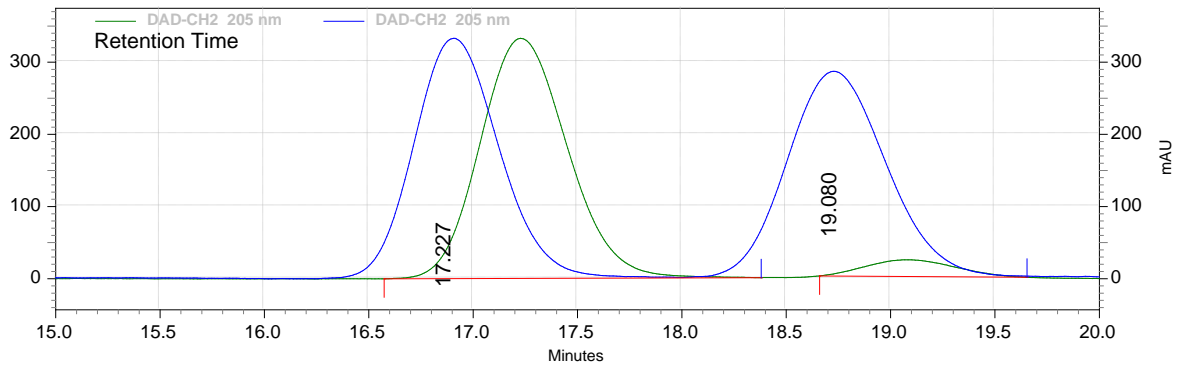

**DAD-CH2 205 nm Results**

| Retention Time | Area     | Area % | Height  | Height % |
|----------------|----------|--------|---------|----------|
| 17.227         | 38692545 | 93.36  | 1330248 | 93.49    |
| 19.080         | 2750934  | 6.64   | 92660   | 6.51     |
| Totals         | 41443479 | 100.00 | 1422908 | 100.00   |

**2d**

**Area % Report**

Data File: 1f-SM-C:\Documents and Settings\Yu lab hplc\Desktop\lingchu-kinetic resolution\CL07099-2-sm-ee-5%-0.5mL-20min-ASH  
Method: C:\EZChrom Elite\Enterprise\Projects\Default\Method\A 120 min without fc 0.5 ml per min.met  
Acquired: 10/19/2013 1:18:18 PM  
Printed: 1/9/2014 9:57:34 PM

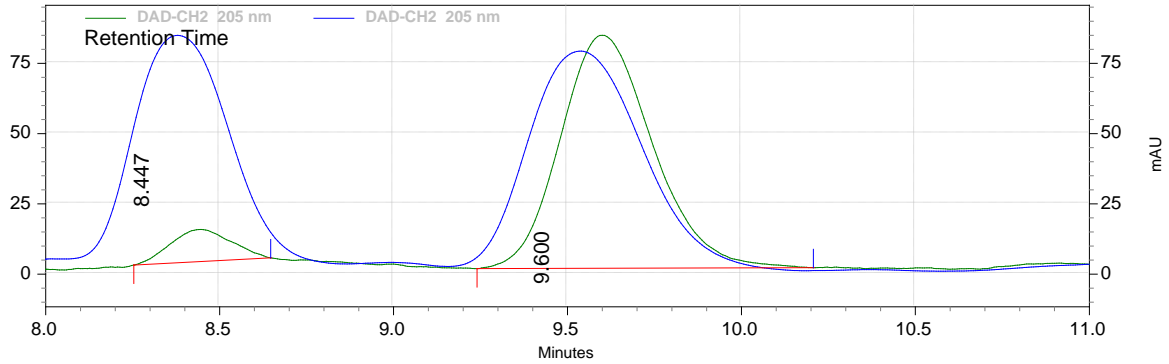

**DAD-CH2 205 nm Results**

| Retention Time | Area           | Area %        | Height        | Height %      |
|----------------|----------------|---------------|---------------|---------------|
| 8.447          | 553170         | 8.29          | 45644         | 12.10         |
| 9.600          | 6121454        | 91.71         | 331511        | 87.90         |
| <b>Totals</b>  | <b>6674624</b> | <b>100.00</b> | <b>377155</b> | <b>100.00</b> |



**3d**  
**Area % Report**

Data File: 1f-PR-C:\Documents and Settings\Yu lab hplc\Desktop\lingchu-kinetic  
 resolution\CL07099-pr-ee-5%-0.5mL-20min-ASH  
 Method: C:\EZChrom Elite\Enterprise\Projects\Default\Method\A 120 min without fc 0.5 ml per min.met  
 Acquired: 10/19/2013 1:35:39 PM  
 Printed: 1/9/2014 10:00:46 PM

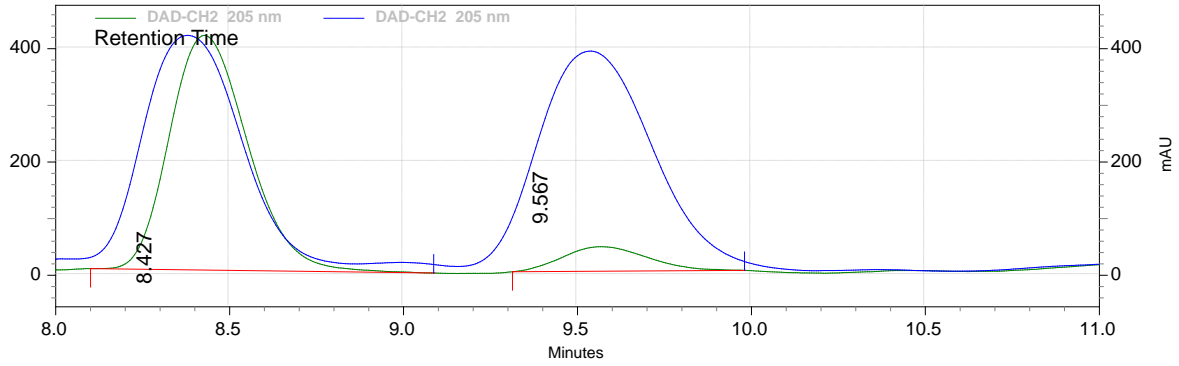

**DAD-CH2 205  
 nm Results**

| Retention Time | Area            | Area %        | Height         | Height %      |
|----------------|-----------------|---------------|----------------|---------------|
| 8.427          | 25936124        | 89.85         | 1657243        | 90.55         |
| 9.567          | 2928957         | 10.15         | 172898         | 9.45          |
| <b>Totals</b>  | <b>28865081</b> | <b>100.00</b> | <b>1830141</b> | <b>100.00</b> |

2e

Area % Report

Data File: 1e-SM-C:\Documents and Settings\Yu lab hplc\Desktop\lingchu-kinetic resolution\CL07058-sm-ee-5%-0.5mL-25min-ASH  
Method: C:\EZChrom Elite\Enterprise\Projects\Default\Method\A 120 min without fc 0.5 ml per min.met  
Acquired: 10/9/2013 2:10:40 PM  
Printed: 1/9/2014 9:52:36 PM

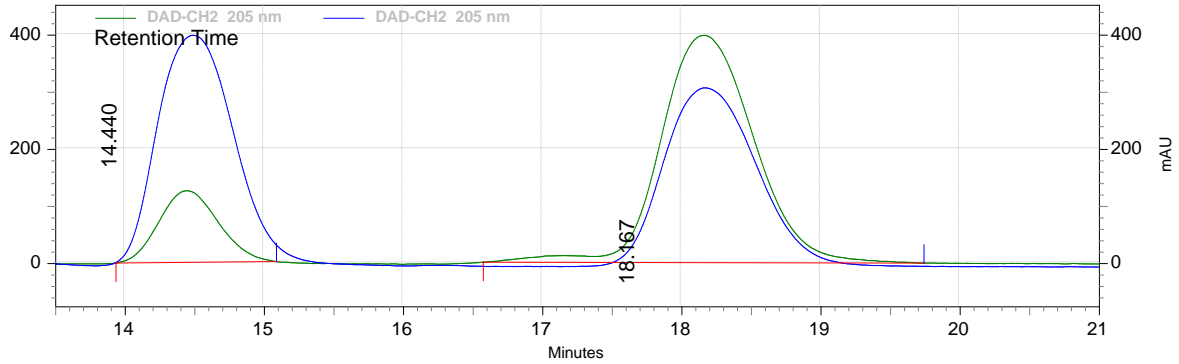

DAD-CH2 205 nm Results

| Retention Time | Area     | Area % | Height  | Height % |
|----------------|----------|--------|---------|----------|
| 14.440         | 14849463 | 16.78  | 501233  | 23.95    |
| 18.167         | 73659831 | 83.22  | 1591743 | 76.05    |
| Totals         | 88509294 | 100.00 | 2092976 | 100.00   |

3e

Area % Report

Data File: 1e-PR-C:\Documents and Settings\Yu lab hplc\Desktop\lingchu-kinetic resolution\CL07058-pr-re-ee-5%-0.5mL-25min-ASH  
Method: C:\EZChrom Elite\Enterprise\Projects\Default\Method\A 120 min without fc 0.5 ml per min.met  
Acquired: 10/9/2013 3:03:36 PM  
Printed: 1/9/2014 9:54:44 PM

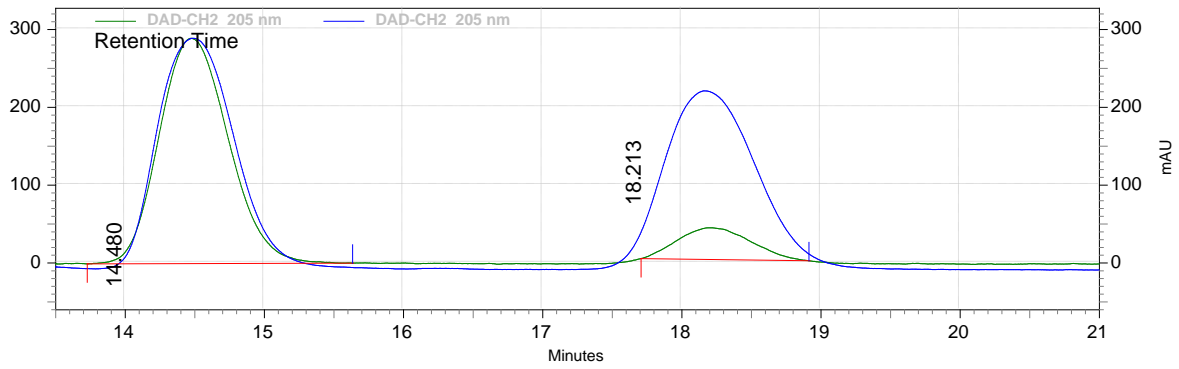

DAD-CH2 205 nm Results

| Retention Time | Area     | Area % | Height  | Height % |
|----------------|----------|--------|---------|----------|
| 14.480         | 39925253 | 87.03  | 1157407 | 87.66    |
| 18.213         | 5948378  | 12.97  | 162980  | 12.34    |
| Totals         | 45873631 | 100.00 | 1320387 | 100.00   |

2f

Area % Report

Data File: 1d-SM-C:\Documents and Settings\Yu lab hplc\Desktop\lingchu-kinetic resolution\CL06105-SM-ee-5%-0.8mL-30min-ASH  
Method: C:\EZChrom Elite\Enterprise\Projects\Default\Method\A 120 min without fc 0.5 ml per min.met  
Acquired: 8/23/2013 12:30:53 AM  
Printed: 1/9/2014 9:43:35 PM

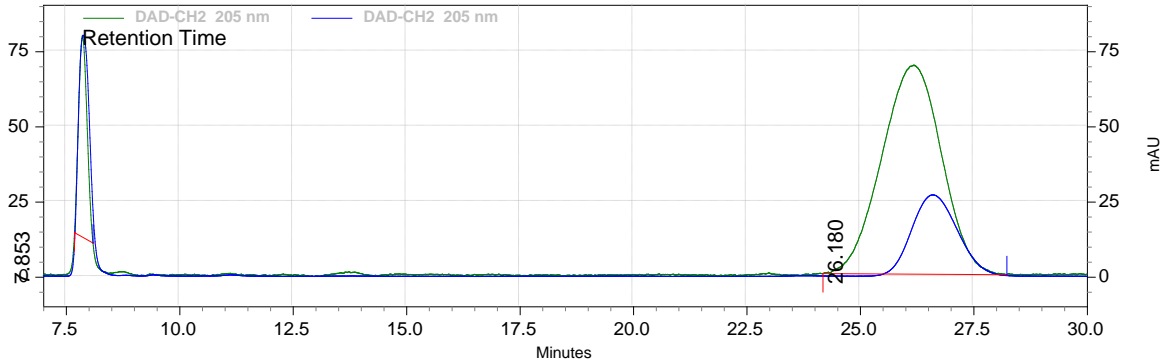

DAD-CH2 205 nm Results

| Retention Time | Area     | Area % | Height | Height % |
|----------------|----------|--------|--------|----------|
| 7.853          | 3447949  | 11.88  | 268289 | 49.09    |
| 26.180         | 25587027 | 88.12  | 278199 | 50.91    |
| Totals         | 29034976 | 100.00 | 546488 | 100.00   |

**3f**

**Area % Report**

Data File: 1d-PR-C:\Documents and Settings\Yu lab hplc\Desktop\lingchu-kinetic resolution\CL06105-pr-ee-5%-0.5mL-40min-ASH  
 Method: C:\EZChrom Elite\Enterprise\Projects\Default\Method\A 120 min without fc 0.5 ml per min.met  
 Acquired: 9/5/2013 11:33:46 PM  
 Printed: 1/9/2014 9:49:32 PM

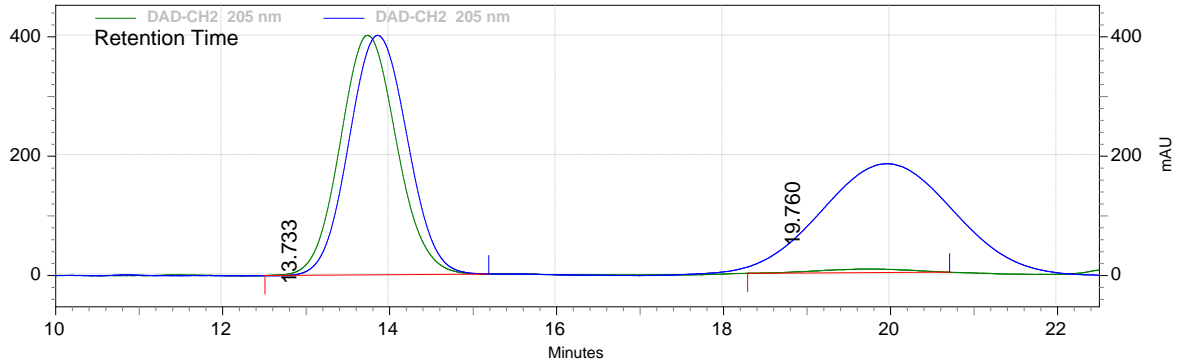

**DAD-CH2 205 nm Results**

| Retention Time | Area            | Area %        | Height         | Height %      |
|----------------|-----------------|---------------|----------------|---------------|
| 13.733         | 75586167        | 97.67         | 1605480        | 98.52         |
| 19.760         | 1803880         | 2.33          | 24080          | 1.48          |
| <b>Totals</b>  | <b>77390047</b> | <b>100.00</b> | <b>1629560</b> | <b>100.00</b> |

**2g**  
**Area % Report**

Data File: 3a-SM-C:\Documents and Settings\Yu lab hplc\Desktop\lingchu-kinetic  
 resolution\CL06134-SM-ee-5%-0.8mL-40min-ASH  
 Method: C:\EZChrom Elite\Enterprise\Projects\Default\Method\A 120 min without fc 0.5 ml per min.met  
 Acquired: 8/22/2013 10:14:50 PM  
 Printed: 1/10/2014 10:24:15 AM

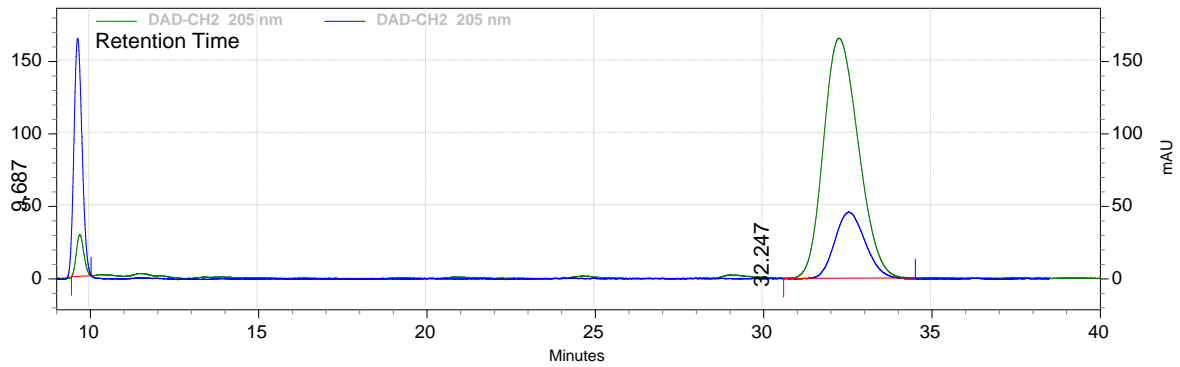

**DAD-CH2 205  
 nm Results**

| Retention Time | Area            | Area %        | Height        | Height %      |
|----------------|-----------------|---------------|---------------|---------------|
| 9.687          | 1759980         | 3.56          | 114474        | 14.75         |
| 32.247         | 47725381        | 96.44         | 661858        | 85.25         |
| <b>Totals</b>  | <b>49485361</b> | <b>100.00</b> | <b>776332</b> | <b>100.00</b> |

**3g**  
**Area % Report**

Data File: 3a-PR-C:\Documents and Settings\Yu lab hplc\Desktop\lingchu-kinetic resolution\CL06134-PR-ee-5%-0.8mL-40min-ASH  
 Method: C:\EZChrom Elite\Enterprise\Projects\Default\Method\A 120 min without fc 0.5 ml per min.met  
 Acquired: 8/22/2013 11:27:53 PM  
 Printed: 1/10/2014 10:26:28 AM

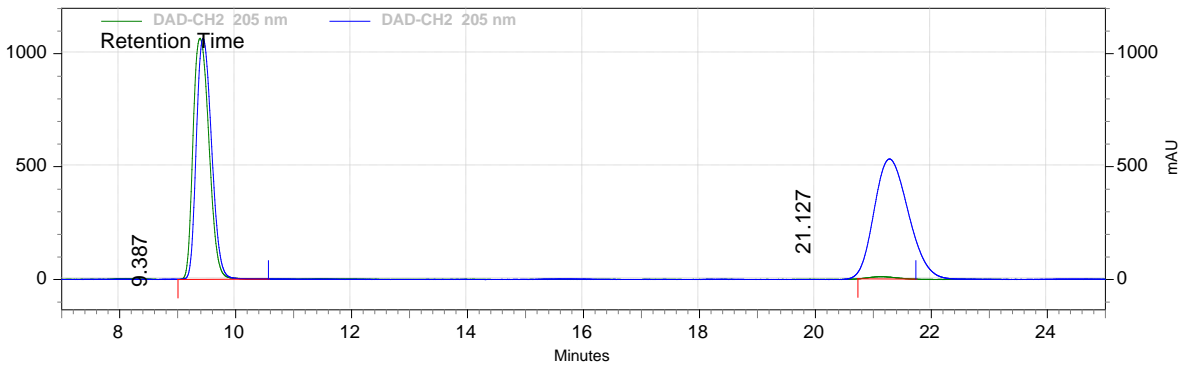

**DAD-CH2 205 nm Results**

| Retention Time | Area            | Area %        | Height         | Height %      |
|----------------|-----------------|---------------|----------------|---------------|
| 9.387          | 81172696        | 98.49         | 4268645        | 99.06         |
| 21.127         | 1248480         | 1.51          | 40304          | 0.94          |
| <b>Totals</b>  | <b>82421176</b> | <b>100.00</b> | <b>4308949</b> | <b>100.00</b> |

2h

Area % Report

Data File: 3b-SM-C:\Documents and Settings\Yu lab hplc\Desktop\lingchu-kinetic resolution\CL06123-SM-ee-5%-0.8mL-13min-ASH  
Method: C:\EZChrom Elite\Enterprise\Projects\Default\Method\A 120 min without fc 0.5 ml per min.met  
Acquired: 8/23/2013 1:59:28 AM  
Printed: 1/10/2014 10:28:16 AM

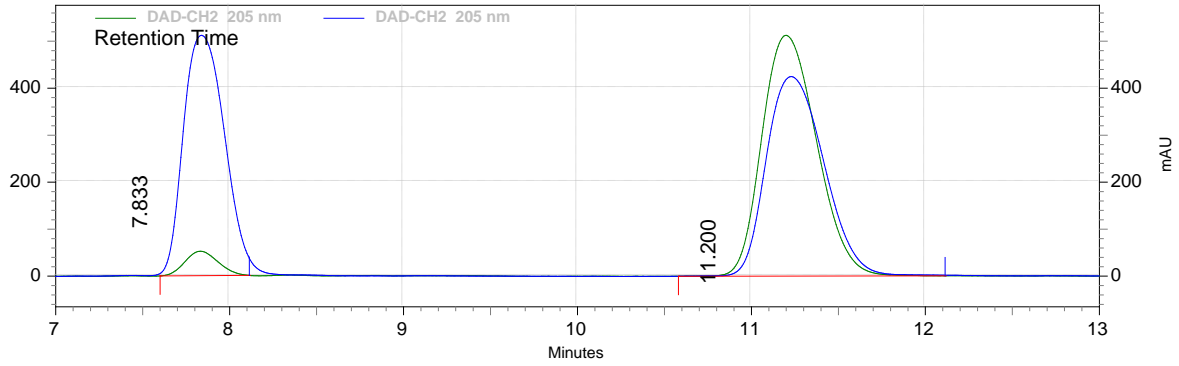

DAD-CH2 205 nm Results

| Retention Time | Area     | Area % | Height  | Height % |
|----------------|----------|--------|---------|----------|
| 7.833          | 2750965  | 5.78   | 208061  | 9.22     |
| 11.200         | 44857038 | 94.22  | 2049113 | 90.78    |
| Totals         | 47608003 | 100.00 | 2257174 | 100.00   |



**3h**  
**Area % Report**

Data File: 3b-PR-C:\Documents and Settings\Yu lab hplc\Desktop\lingchu-kinetic resolution\CL06123-PR-ee-5%-0.8mL-13min-ASH  
 Method: C:\EZChrom Elite\Enterprise\Projects\Default\Method\A 120 min without fc 0.5 ml per min.met  
 Acquired: 8/23/2013 2:28:09 AM  
 Printed: 1/10/2014 10:30:04 AM

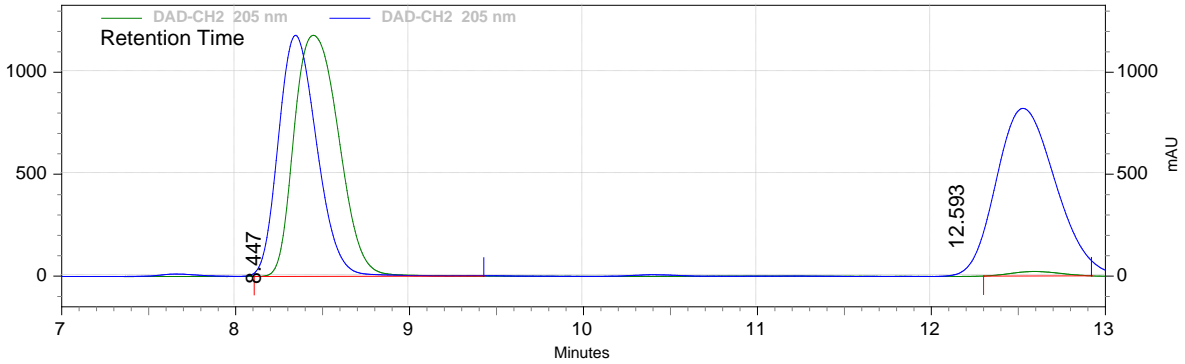

**DAD-CH2 205 nm Results**

| Retention Time | Area            | Area %        | Height         | Height %      |
|----------------|-----------------|---------------|----------------|---------------|
| 8.447          | 84402874        | 98.06         | 4729336        | 98.18         |
| 12.593         | 1673606         | 1.94          | 87486          | 1.82          |
| <b>Totals</b>  | <b>86076480</b> | <b>100.00</b> | <b>4816822</b> | <b>100.00</b> |

2i

Area % Report

Data File: 3c-SM-C:\Documents and Settings\Yu lab hplc\Desktop\lingchu-kinetic resolution\CL07029-sm-ee-5%-0.5mL-40min-ASH  
Method: C:\EZChrom Elite\Enterprise\Projects\Default\Method\A 120 min without fc 0.5 ml per min.met  
Acquired: 9/6/2013 12:56:41 AM  
Printed: 1/10/2014 10:32:03 AM

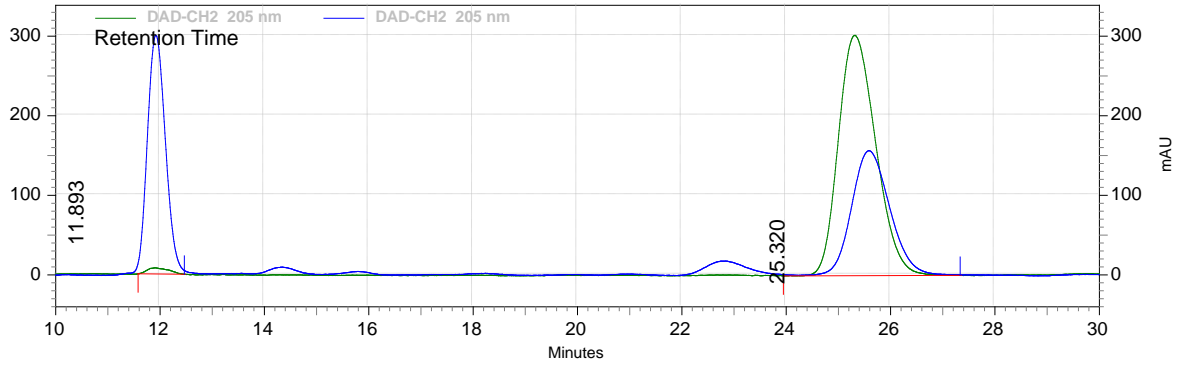

DAD-CH2 205 nm Results

| Retention Time | Area     | Area % | Height  | Height % |
|----------------|----------|--------|---------|----------|
| 11.893         | 892586   | 1.46   | 30779   | 2.48     |
| 25.320         | 60213612 | 98.54  | 1208100 | 97.52    |
| Totals         | 61106198 | 100.00 | 1238879 | 100.00   |

3i

Area % Report

Data File: 3c-PR-C:\Documents and Settings\Yu lab hplc\Desktop\lingchu-kinetic resolution\CL07029-pr-ee-5%-0.5mL-25min-ASH  
Method: C:\EZChrom Elite\Enterprise\Projects\Default\Method\A 120 min without fc 0.5 ml per min.met  
Acquired: 9/6/2013 2:04:30 AM  
Printed: 1/10/2014 10:35:13 AM

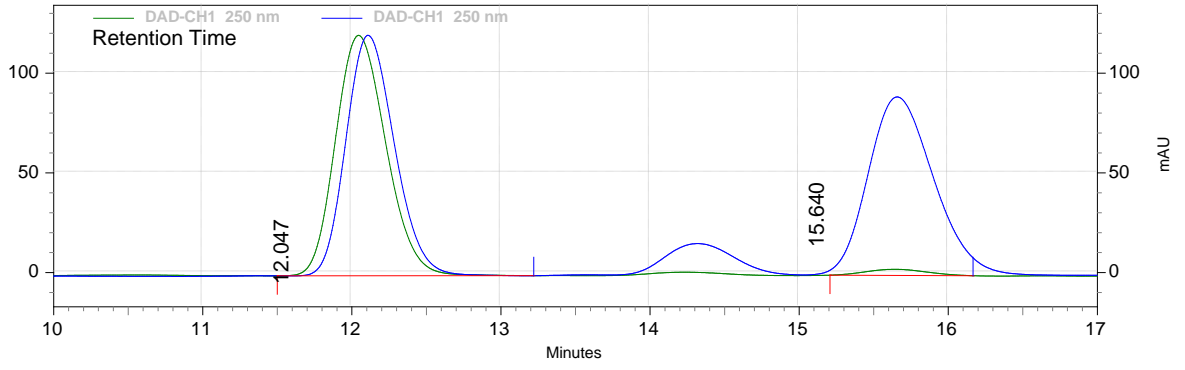

DAD-CH1 250 nm Results

| Retention Time | Area     | Area % | Height | Height % |
|----------------|----------|--------|--------|----------|
| 12.047         | 11338520 | 97.04  | 482224 | 97.52    |
| 15.640         | 346014   | 2.96   | 12270  | 2.48     |

|        |          |        |        |        |
|--------|----------|--------|--------|--------|
| Totals | 11684534 | 100.00 | 494494 | 100.00 |
|--------|----------|--------|--------|--------|

**2j**  
**Area % Report**

Data File: 3d-SM-C:\Documents and Settings\Yu lab hplc\Desktop\lingchu-kinetic resolution\CL06120-SM-ee-5%-0.8mL-20min-ASH  
 Method: C:\EZChrom Elite\Enterprise\Projects\Default\Method\A 120 min without fc 0.5 ml per min.met  
 Acquired: 8/22/2013 8:38:28 PM  
 Printed: 1/10/2014 10:37:29 AM

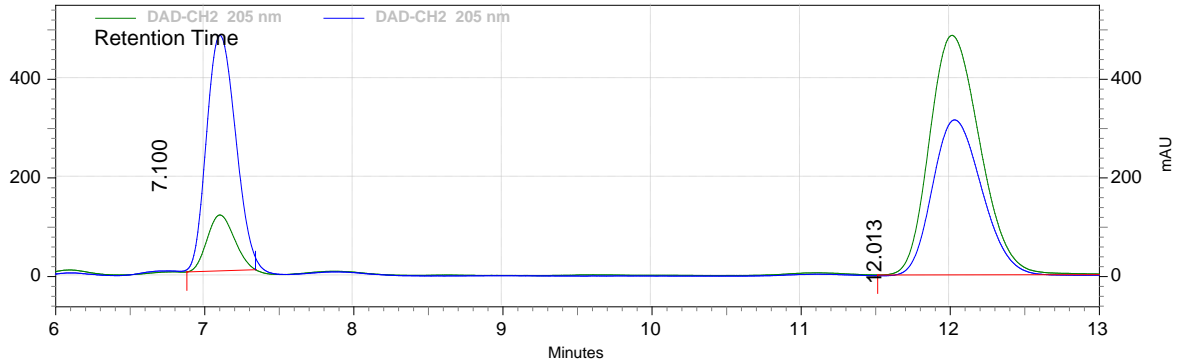

**DAD-CH2 205 nm Results**

| Retention Time | Area            | Area %        | Height         | Height %      |
|----------------|-----------------|---------------|----------------|---------------|
| 7.100          | 5722341         | 11.12         | 452938         | 18.91         |
| 12.013         | 45735849        | 88.88         | 1941802        | 81.09         |
| <b>Totals</b>  | <b>51458190</b> | <b>100.00</b> | <b>2394740</b> | <b>100.00</b> |

**3j**  
**Area % Report**

Data File: 3d-PR-C:\Documents and Settings\Yu lab hplc\Desktop\lingchu-kinetic  
 resolution\CL06120-PR-ee-5%-0.8mL-20min-ASH  
 Method: C:\EZChrom Elite\Enterprise\Projects\Default\Method\A 120 min without fc 0.5 ml per min.met  
 Acquired: 8/22/2013 9:15:44 PM  
 Printed: 1/10/2014 10:40:00 AM

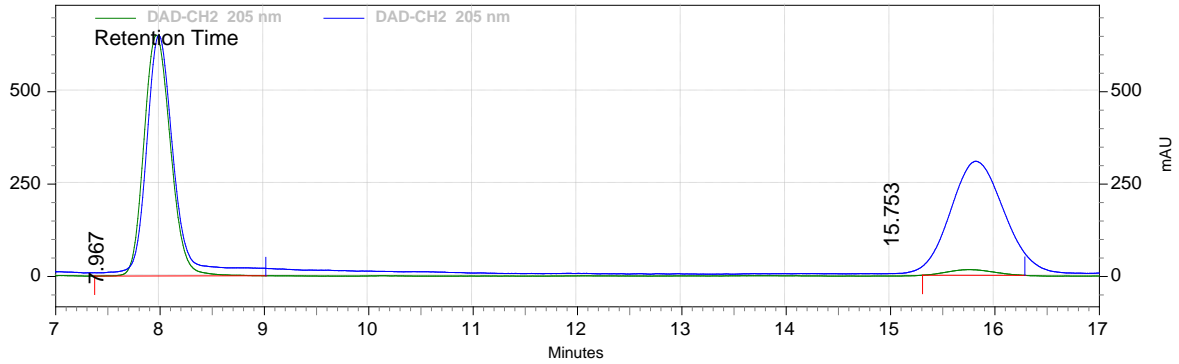

**DAD-CH2 205 nm Results**

| Retention Time | Area            | Area %        | Height         | Height %      |
|----------------|-----------------|---------------|----------------|---------------|
| 7.967          | 45919187        | 96.11         | 2604305        | 97.69         |
| 15.753         | 1860675         | 3.89          | 61618          | 2.31          |
| <b>Totals</b>  | <b>47779862</b> | <b>100.00</b> | <b>2665923</b> | <b>100.00</b> |

2k

Area % Report

Data File: 3e-SM-C:\EZChrom  
Elite\Enterprise\Projects\Default\Data\LingChu\CL08098-SM-ee-10%-0.3mL-40min-ASH  
Method: C:\EZChrom Elite\Enterprise\Projects\Default\Method\A 120 min without fc 0.5 ml per min.met  
Acquired: 12/26/2013 10:41:34 AM  
Printed: 1/10/2014 10:44:33 AM

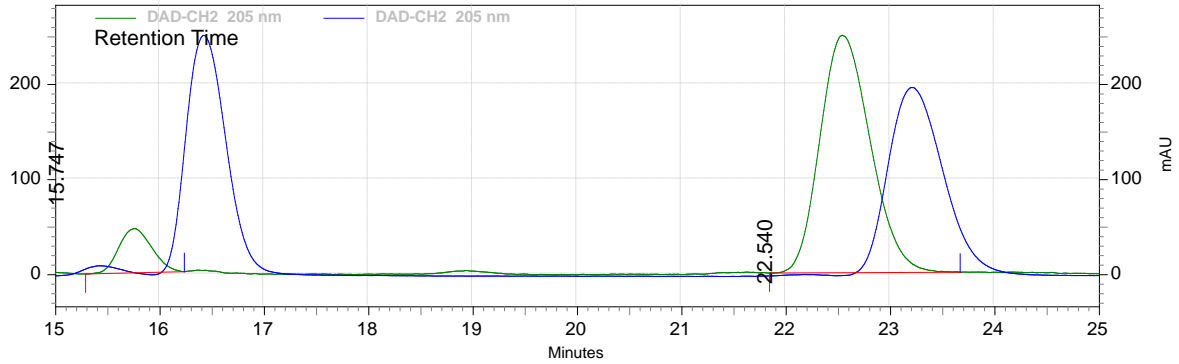

DAD-CH2 205 nm Results

| Retention Time | Area     | Area % | Height  | Height % |
|----------------|----------|--------|---------|----------|
| 15.747         | 4094157  | 10.89  | 185908  | 15.70    |
| 22.540         | 33507222 | 89.11  | 998394  | 84.30    |
| Totals         | 37601379 | 100.00 | 1184302 | 100.00   |

3k

Area % Report

Data File: 3e-PR-C:\EZChrom  
Elite\Enterprise\Projects\Default\Data\LingChu\CL08098-PR-ee-10%-0.3mL-60min-ASH  
Method: C:\EZChrom Elite\Enterprise\Projects\Default\Method\A 120 min without fc 0.5 ml per min.met  
Acquired: 12/26/2013 11:09:20 AM  
Printed: 1/10/2014 10:47:38 AM

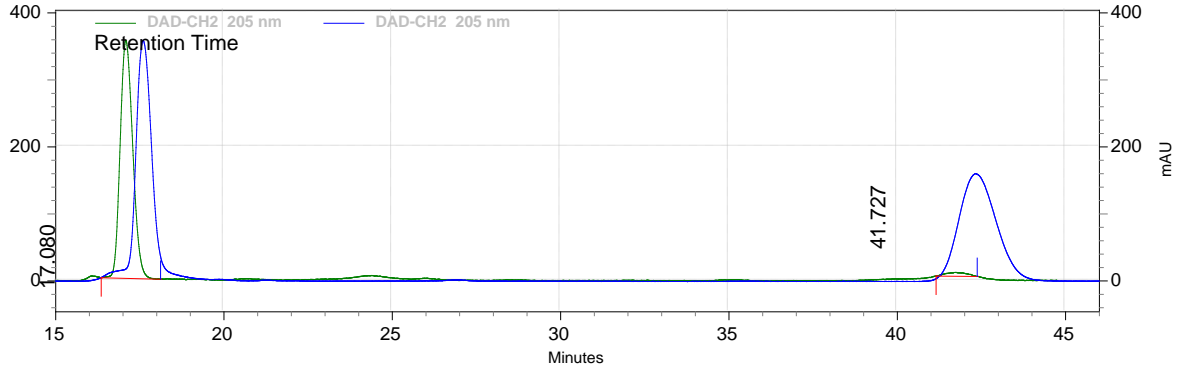

DAD-CH2 205 nm Results

| Retention Time | Area     | Area % | Height  | Height % |
|----------------|----------|--------|---------|----------|
| 17.080         | 36972202 | 97.33  | 1420820 | 98.38    |
| 41.727         | 1015904  | 2.67   | 23411   | 1.62     |
| Totals         | 37988106 | 100.00 | 1444231 | 100.00   |

21

Area % Report

Data File: 3f-SM-C:\Documents and Settings\Yu lab hplc\Desktop\lingchu-kinetic resolution\CL07084-sm-ee-5%-0.5mL-30min-ASH  
 Method: C:\EZChrom Elite\Enterprise\Projects\Default\Method\A 120 min without fc 0.5 ml per min.met  
 Acquired: 10/9/2013 10:49:05 AM  
 Printed: 1/10/2014 10:50:34 AM

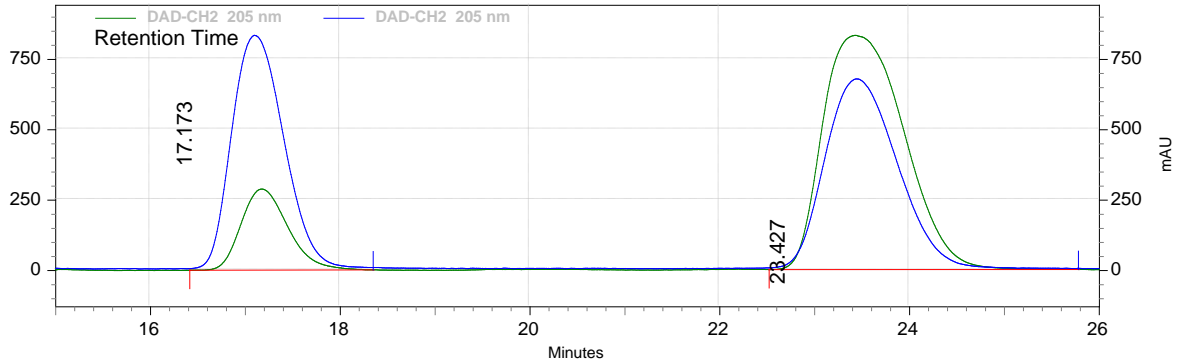

**DAD-CH2 205 nm Results**

| Retention Time | Area             | Area %        | Height         | Height %      |
|----------------|------------------|---------------|----------------|---------------|
| 17.173         | 39431375         | 16.58         | 1150810        | 25.70         |
| 23.427         | 198359465        | 83.42         | 3326859        | 74.30         |
| <b>Totals</b>  | <b>237790840</b> | <b>100.00</b> | <b>4477669</b> | <b>100.00</b> |



31

Area % Report

Data File: 3f-PR-C:\Documents and Settings\Yu lab hplc\Desktop\lingchu-kinetic resolution\CL07084-pr-ee-5%-0.5mL-45min-ASH  
 Method: C:\EZChrom Elite\Enterprise\Projects\Default\Method\A 120 min without fc 0.5 ml per min.met  
 Acquired: 10/9/2013 12:06:58 PM  
 Printed: 1/10/2014 10:52:17 AM

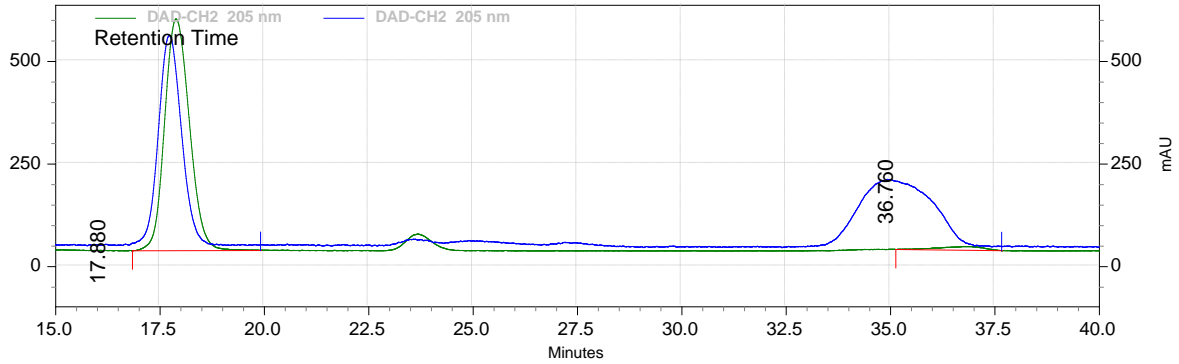

DAD-CH2 205 nm Results

| Retention Time | Area     | Area % | Height  | Height % |
|----------------|----------|--------|---------|----------|
| 17.880         | 93406456 | 97.10  | 2258366 | 98.39    |
| 36.760         | 2792665  | 2.90   | 36964   | 1.61     |
| Totals         | 96199121 | 100.00 | 2295330 | 100.00   |

**2m**  
**Area % Report**

Data File: C:\EZChrom  
 Elite\Enterprise\Projects\Default\Data\LingChu\CL10022-1-sm-re-ee-10%-0.5mL-25min-ASH  
 Method: C:\EZChrom Elite\Enterprise\Projects\Default\Method\A 25 min without frc 0.5 ml per min.met  
 Acquired: 7/3/2014 2:26:48 PM  
 Printed: 7/6/2014 3:10:04 PM

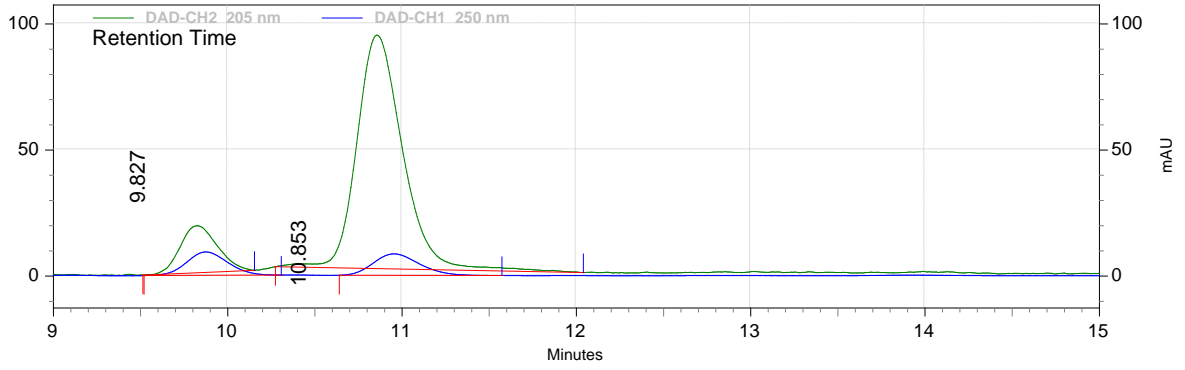

**DAD-CH2 205 nm Results**

| Retention Time | Area           | Area %        | Height        | Height %      |
|----------------|----------------|---------------|---------------|---------------|
| 9.827          | 1111503        | 14.05         | 74561         | 16.76         |
| 10.853         | 6799405        | 85.95         | 370221        | 83.24         |
| <b>Totals</b>  | <b>7910908</b> | <b>100.00</b> | <b>444782</b> | <b>100.00</b> |

**3m-mono  
Area % Report**

Data File: C:\EZChrom  
 Elite\Enterprise\Projects\Default\Data\LingChu\CL10022-1-PR-ee-10%-0.5mL-20min-ASH  
 Method: C:\EZChrom Elite\Enterprise\Projects\Default\Method\A 20 min without fc 0.5 ml per min.met  
 Acquired: 7/2/2014 11:11:43 PM  
 Printed: 7/6/2014 3:15:48 PM

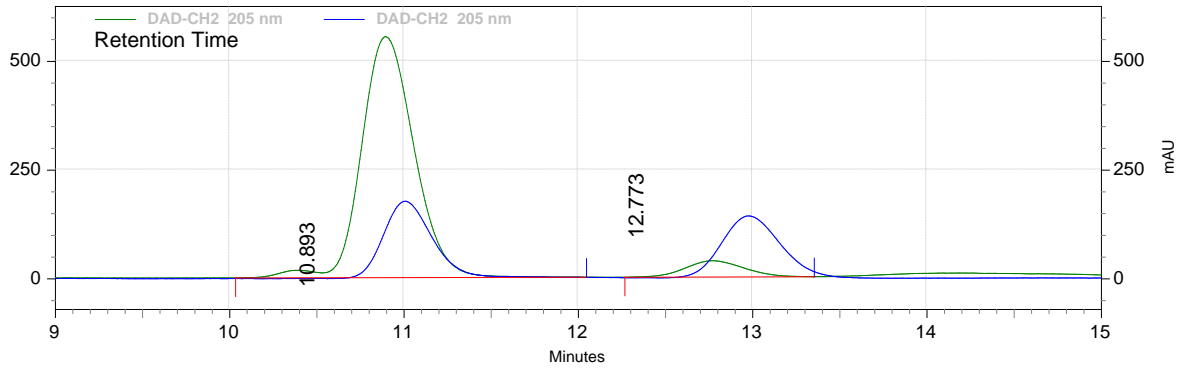

**DAD-CH2 205  
nm Results**

| Retention Time | Area            | Area %        | Height         | Height %      |
|----------------|-----------------|---------------|----------------|---------------|
| 10.893         | 46737471        | 93.06         | 2215271        | 93.66         |
| 12.773         | 3487817         | 6.94          | 149915         | 6.34          |
| <b>Totals</b>  | <b>50225288</b> | <b>100.00</b> | <b>2365186</b> | <b>100.00</b> |

**3m-di**  
**Area % Report**

Data File: C:\EZChrom  
 Elite\Enterprise\Projects\Default\Data\LingChu\CL10022-1-di-ee-10%-0.5mL-25min-ASH  
 Method: C:\EZChrom Elite\Enterprise\Projects\Default\Method\A 25 min without frc 0.5 ml per min.met  
 Acquired: 7/3/2014 2:00:26 PM  
 Printed: 7/6/2014 3:19:30 PM

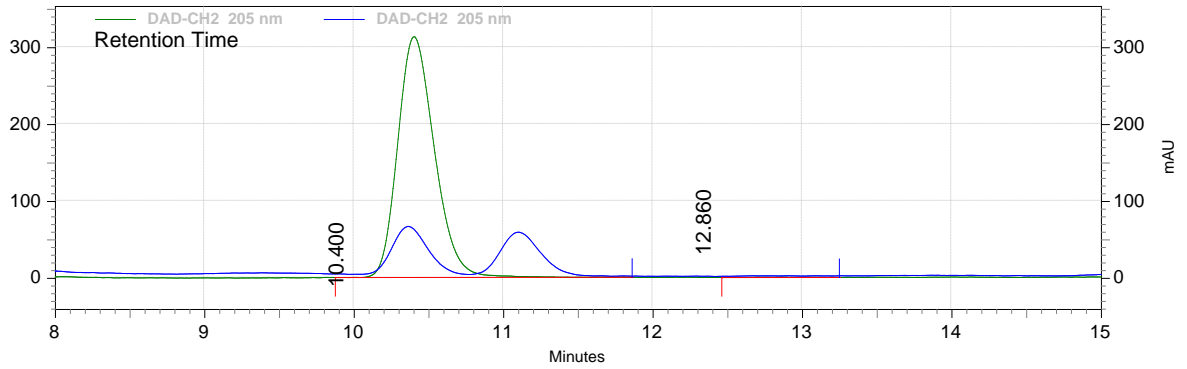

**DAD-CH2 205 nm Results**

| Retention Time | Area            | Area %        | Height         | Height %      |
|----------------|-----------------|---------------|----------------|---------------|
| 10.400         | 21413422        | 99.73         | 1252953        | 99.79         |
| 12.860         | 57268           | 0.27          | 2630           | 0.21          |
| <b>Totals</b>  | <b>21470690</b> | <b>100.00</b> | <b>1255583</b> | <b>100.00</b> |

**2n**  
**Area % Report**

Data File: C:\EZChrom  
 Elite\Enterprise\Projects\Default\Data\LingChu\CL10075-1-sm-ee-10%-0.5mL-25min-ASH  
 Method: C:\EZChrom Elite\Enterprise\Projects\Default\Method\A 25 min without frc 0.5 ml per min.met  
 Acquired: 8/19/2014 11:15:48 AM  
 Printed: 8/24/2014 5:40:09 PM

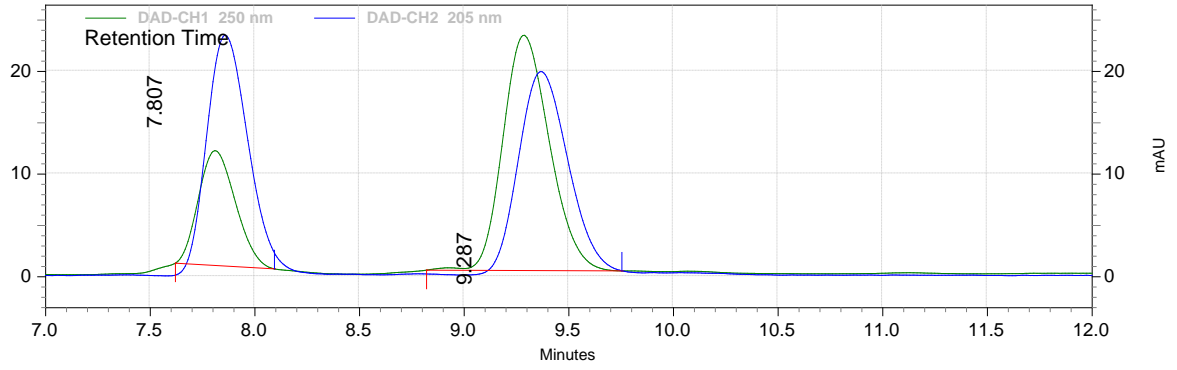

**DAD-CH1 250 nm Results**

| Retention Time | Area           | Area %        | Height        | Height %      |
|----------------|----------------|---------------|---------------|---------------|
| 7.807          | 548903         | 27.89         | 44676         | 32.78         |
| 9.287          | 1419192        | 72.11         | 91613         | 67.22         |
| <b>Totals</b>  | <b>1968095</b> | <b>100.00</b> | <b>136289</b> | <b>100.00</b> |

**3n**

**Area % Report**

Data File: C:\EZChrom  
 Elite\Enterprise\Projects\Default\Data\LingChu\CL10075-1-re-pr-ee-10%-0.5mL-25min-ASH  
 Method: C:\EZChrom Elite\Enterprise\Projects\Default\Method\A 25 min without frc 0.5 ml per min.met  
 Acquired: 8/19/2014 11:42:10 AM  
 Printed: 8/24/2014 5:42:48 PM

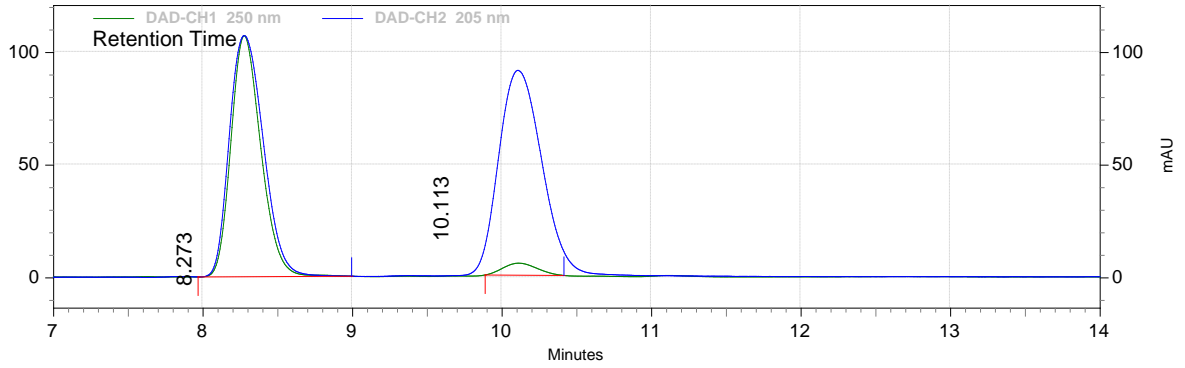

**DAD-CH1 250 nm Results**

| Retention Time | Area           | Area %        | Height        | Height %      |
|----------------|----------------|---------------|---------------|---------------|
| 8.273          | 5953359        | 94.65         | 427788        | 95.26         |
| 10.113         | 336756         | 5.35          | 21301         | 4.74          |
| <b>Totals</b>  | <b>6290115</b> | <b>100.00</b> | <b>449089</b> | <b>100.00</b> |

**5a Area % Report**

Data File: 5a-SM-C:\Documents and Settings\Yu lab hplc\Desktop\lingchu-kinetic resolution\CL08040-SM-ee-10%-0.3mL-60min-OJ  
 Method: C:\EZChrom Elite\Enterprise\Projects\Default\Method\A 120 min without fc 0.5 ml per min.met  
 Acquired: 12/27/2013 12:39:27 PM  
 Printed: 1/10/2014 11:03:52 AM

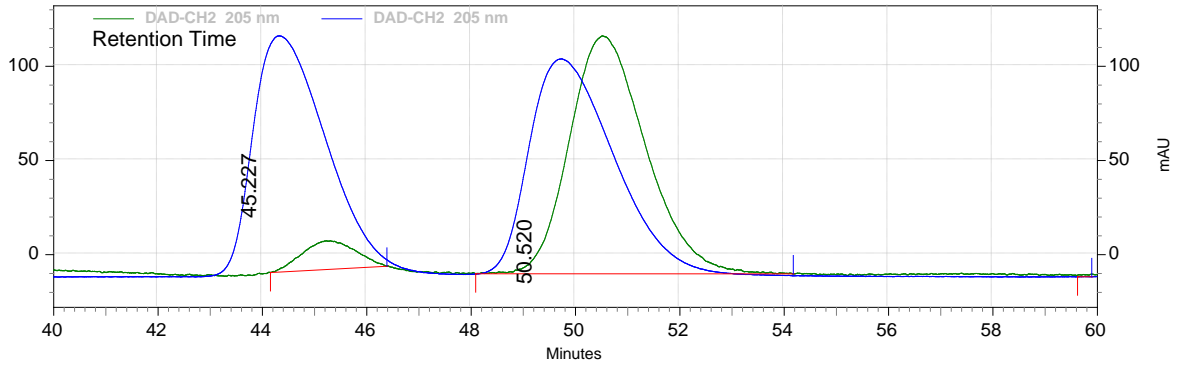

**DAD-CH2 205 nm Results**

| Retention Time | Area            | Area %        | Height        | Height %      |
|----------------|-----------------|---------------|---------------|---------------|
| 45.227         | 4338698         | 7.77          | 61188         | 10.81         |
| 50.520         | 51512114        | 92.23         | 505050        | 89.19         |
| <b>Totals</b>  | <b>55850812</b> | <b>100.00</b> | <b>566238</b> | <b>100.00</b> |

6a

Area % Report

Data File: 5a-PR-C:\EZChrom  
Elite\Enterprise\Projects\Default\Data\LingChu\CL08040-PR-ee-10%-0.2mL-45min-ADH  
Method: C:\EZChrom Elite\Enterprise\Projects\Default\Method\A 120 min without fc 0.5 ml per min.met  
Acquired: 1/11/2014 11:54:45 AM  
Printed: 1/14/2014 10:05:51 AM

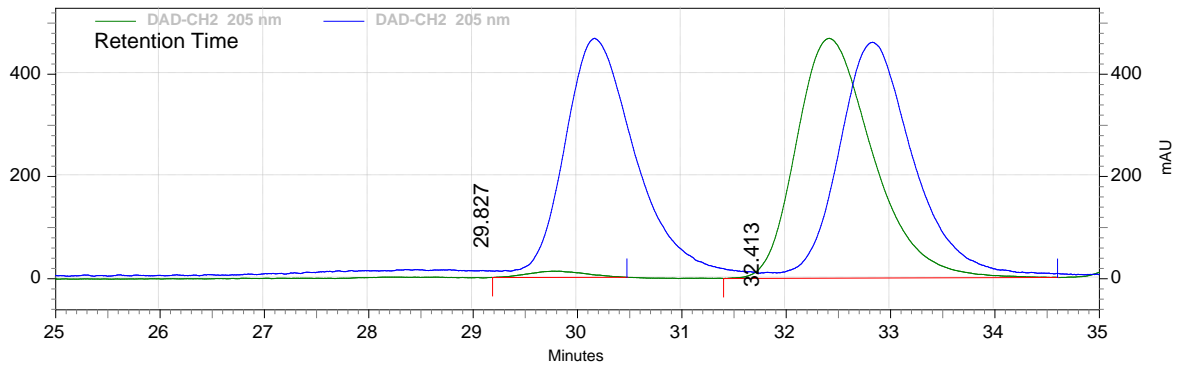

**DAD-CH2 205  
nm Results**

| Retention Time | Area     | Area % | Height  | Height % |
|----------------|----------|--------|---------|----------|
| 29.827         | 1888425  | 1.95   | 49058   | 2.55     |
| 32.413         | 95174677 | 98.05  | 1876398 | 97.45    |
| Totals         | 97063102 | 100.00 | 1925456 | 100.00   |



**5b**  
**Area % Report**

Data File: 5b-SM-C:\Documents and Settings\Yu lab hplc\Desktop\lingchu-kinetic  
 resolution\CL07116-sm-ee-10%-0.5mL-30min-ASH  
 Method: C:\EZChrom Elite\Enterprise\Projects\Default\Method\A 120 min without fc 0.5 ml per min.met  
 Acquired: 10/17/2013 9:22:01 PM  
 Printed: 1/10/2014 11:07:20 AM

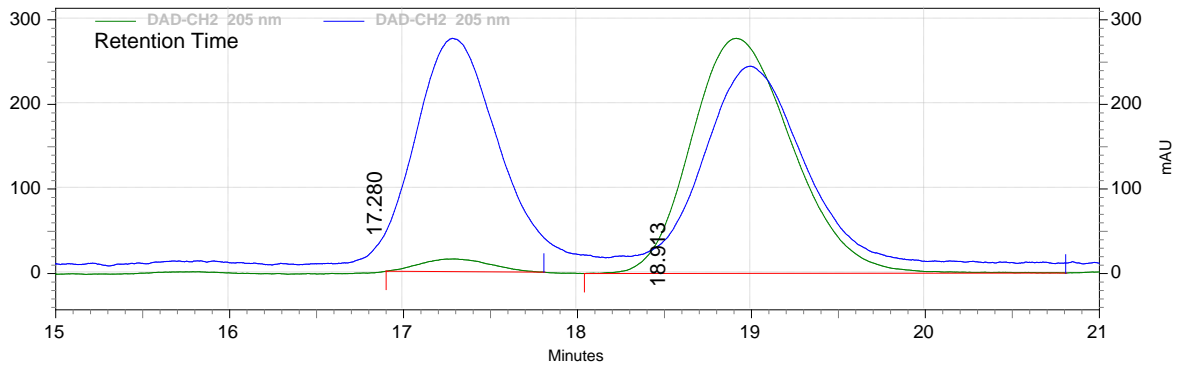

**DAD-CH2 205  
 nm Results**

| Retention Time | Area            | Area %        | Height         | Height %      |
|----------------|-----------------|---------------|----------------|---------------|
| 17.280         | 1670982         | 3.59          | 59640          | 5.09          |
| 18.913         | 44850513        | 96.41         | 1111276        | 94.91         |
| <b>Totals</b>  | <b>46521495</b> | <b>100.00</b> | <b>1170916</b> | <b>100.00</b> |

**6b**

**Area % Report**

Data File: 5b-PR-C:\Documents and Settings\Yu lab hplc\Desktop\lingchu-kinetic resolution\CL07116-pr-ee-10%-0.3mL-40min-ASH  
Method: C:\EZChrom Elite\Enterprise\Projects\Default\Method\A 120 min without fc 0.5 ml per min.met  
Acquired: 10/18/2013 5:00:43 PM  
Printed: 1/10/2014 11:09:23 AM

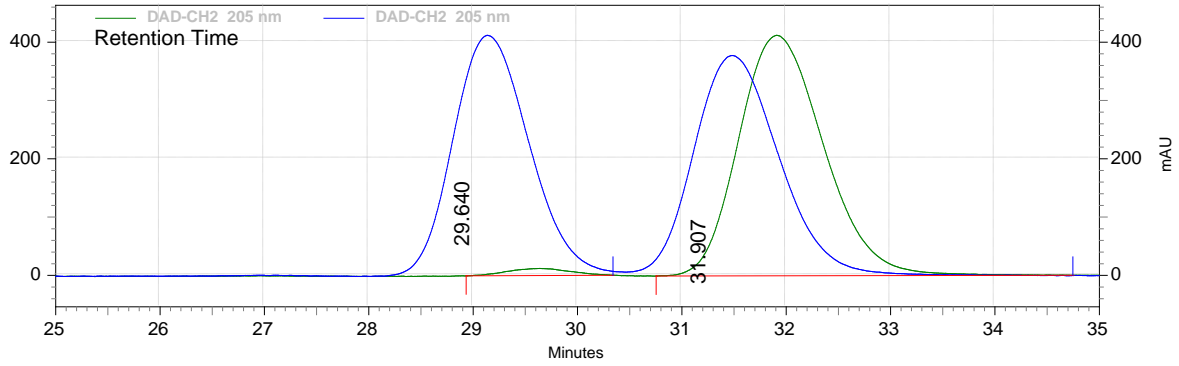

**DAD-CH2 205 nm Results**

| Retention Time | Area     | Area % | Height  | Height % |
|----------------|----------|--------|---------|----------|
| 29.640         | 2037367  | 2.13   | 48992   | 2.88     |
| 31.907         | 93423783 | 97.87  | 1649466 | 97.12    |
| Totals         | 95461150 | 100.00 | 1698458 | 100.00   |

5c

Area % Report

Data File: 5c-SM-C:\EZChrom  
Elite\Enterprise\Projects\Default\Data\LingChu\CL08096-SM-ee-10%-0.5mL-60min-OJ  
Method: C:\EZChrom Elite\Enterprise\Projects\Default\Method\A 120 min without fc 0.5 ml per min.met  
Acquired: 1/5/2014 2:21:19 PM  
Printed: 1/10/2014 11:17:15 AM

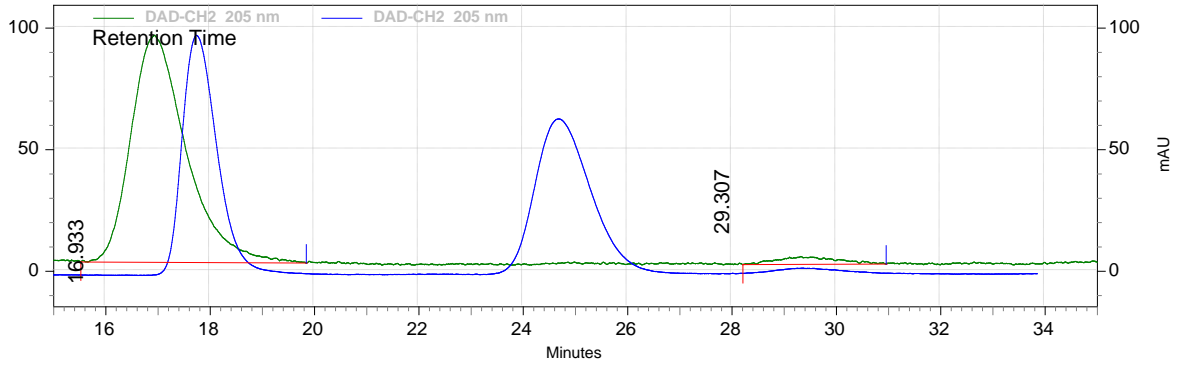

DAD-CH2 205 nm Results

| Retention Time | Area     | Area % | Height | Height % |
|----------------|----------|--------|--------|----------|
| 16.933         | 27482431 | 96.36  | 373223 | 96.65    |
| 29.307         | 1037923  | 3.64   | 12939  | 3.35     |

|        |          |        |        |        |
|--------|----------|--------|--------|--------|
| Totals | 28520354 | 100.00 | 386162 | 100.00 |
|--------|----------|--------|--------|--------|

6c

Area % Report

Data File: 5c-PR-C:\EZChrom  
Elite\Enterprise\Projects\Default\Data\LingChu\CL08096-PR-ee-5%-0.5mL-40min-ADH  
Method: C:\EZChrom Elite\Enterprise\Projects\Default\Method\A 120 min without fc 0.5 ml per min.met  
Acquired: 1/6/2014 9:35:51 PM  
Printed: 1/10/2014 11:25:25 AM

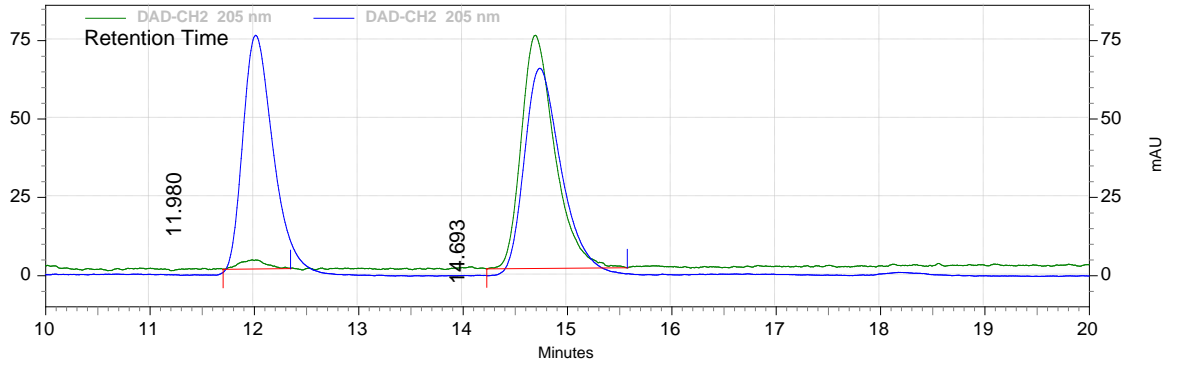

DAD-CH2 205 nm Results

| Retention Time | Area    | Area % | Height | Height % |
|----------------|---------|--------|--------|----------|
| 11.980         | 211866  | 3.09   | 11678  | 3.78     |
| 14.693         | 6650494 | 96.91  | 297508 | 96.22    |

|        |         |        |        |        |
|--------|---------|--------|--------|--------|
| Totals | 6862360 | 100.00 | 309186 | 100.00 |
|--------|---------|--------|--------|--------|

**5d**  
**Area % Report**

Data File: 5d-SM-C:\Documents and Settings\Yu lab hplc\Desktop\lingchu-kinetic  
 resolution\CL08081-SM-ee-10%-0.5mL-60min-OJ  
 Method: C:\EZChrom Elite\Enterprise\Projects\Default\Method\A 120 min without fc 0.5 ml per min.met  
 Acquired: 12/14/2013 5:25:59 PM  
 Printed: 1/10/2014 2:25:40 PM

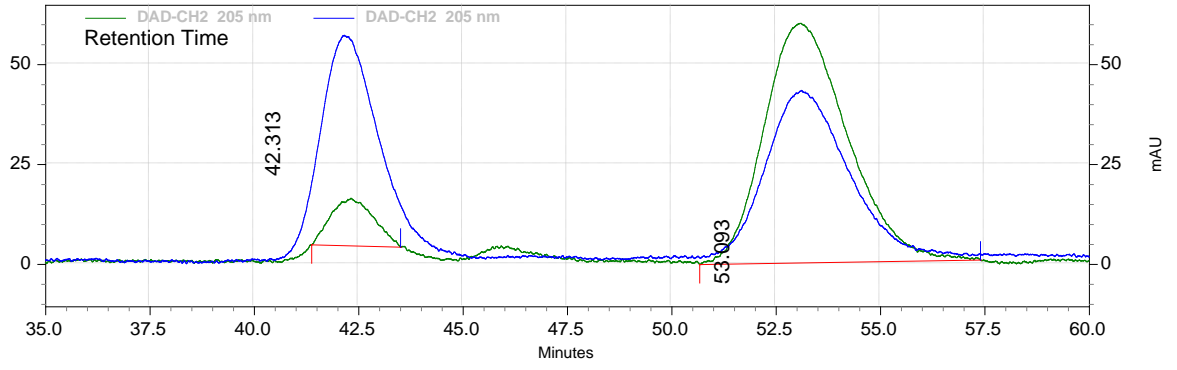

**DAD-CH2 205 nm Results**

| Retention Time | Area     | Area % | Height | Height % |
|----------------|----------|--------|--------|----------|
| 42.313         | 3405330  | 9.28   | 47562  | 16.55    |
| 53.093         | 33304182 | 90.72  | 239824 | 83.45    |

|        |          |        |        |        |
|--------|----------|--------|--------|--------|
| Totals | 36709512 | 100.00 | 287386 | 100.00 |
|--------|----------|--------|--------|--------|

6d

Area % Report

Data File: 5d-PR-C:\Documents and Settings\Yu lab hplc\Desktop\lingchu-kinetic resolution\CL08081-PR-ee-10%-0.5mL-60min-OJ  
Method: C:\EZChrom Elite\Enterprise\Projects\Default\Method\A 120 min without fc 0.5 ml per min.met  
Acquired: 12/14/2013 6:27:30 PM  
Printed: 1/10/2014 2:29:20 PM

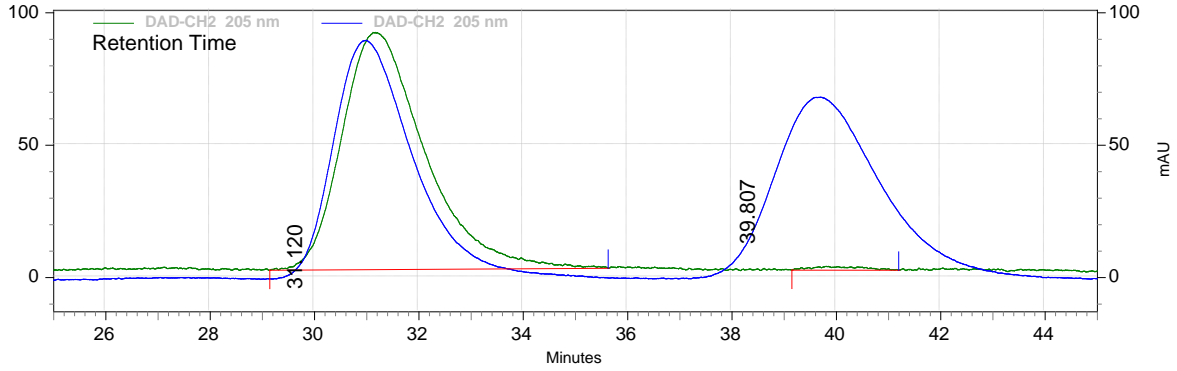

DAD-CH2 205 nm Results

| Retention Time | Area     | Area % | Height | Height % |
|----------------|----------|--------|--------|----------|
| 31.120         | 39645952 | 99.00  | 358370 | 98.41    |
| 39.807         | 402004   | 1.00   | 5804   | 1.59     |
| Totals         | 40047956 | 100.00 | 364174 | 100.00   |

5e

Area % Report

Data File: C:\EZChrom  
Elite\Enterprise\Projects\Default\Data\LingChu\CL09065-2-SM-ee-10%-0.5mL-75min-OJ  
Method: C:\EZChrom Elite\Enterprise\Projects\Default\Method\A 60 min without fc 0.4 ml per min.met  
Acquired: 4/2/2014 1:07:23 PM  
Printed: 4/4/2014 9:18:36 PM

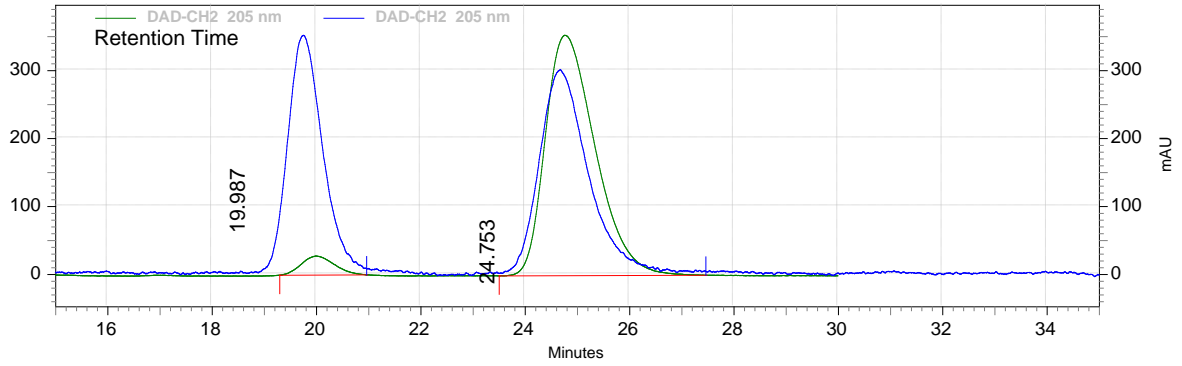

DAD-CH2 205 nm Results

| Retention Time | Area     | Area % | Height  | Height % |
|----------------|----------|--------|---------|----------|
| 19.987         | 4926216  | 4.99   | 111914  | 7.33     |
| 24.753         | 93889663 | 95.01  | 1414079 | 92.67    |
| Totals         | 98815879 | 100.00 | 1525993 | 100.00   |

6e

Area % Report

Data File: 5f-PR-C:\EZChrom  
Elite\Enterprise\Projects\Default\Data\LingChu\CL08058-PR-ee-10%-0.3mL-75min-OJ  
Method: C:\EZChrom Elite\Enterprise\Projects\Default\Method\A 120 min without fc 0.5 ml per min.met  
Acquired: 12/13/2013 10:18:54 PM  
Printed: 1/10/2014 2:42:08 PM

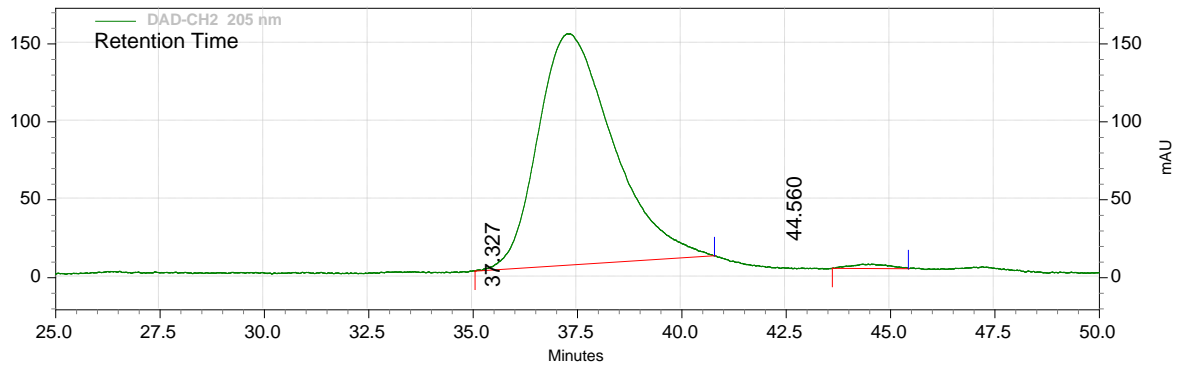

DAD-CH2 205  
nm Results

| Retention Time | Area     | Area % | Height | Height % |
|----------------|----------|--------|--------|----------|
| 37.327         | 74377760 | 99.06  | 593490 | 98.15    |
| 44.560         | 707487   | 0.94   | 11171  | 1.85     |
| Totals         | 75085247 | 100.00 | 604661 | 100.00   |



5f

Area % Report

Data File: C:\EZChrom  
Elite\Enterprise\Projects\Default\Data\LingChu\CL08127-SM-ee-10%-0.5mL-40min-OJ  
Method: C:\EZChrom Elite\Enterprise\Projects\Default\Method\A 60 min without fc 0.4 ml per min.met  
Acquired: 2/20/2014 10:03:16 AM  
Printed: 4/4/2014 9:16:47 PM

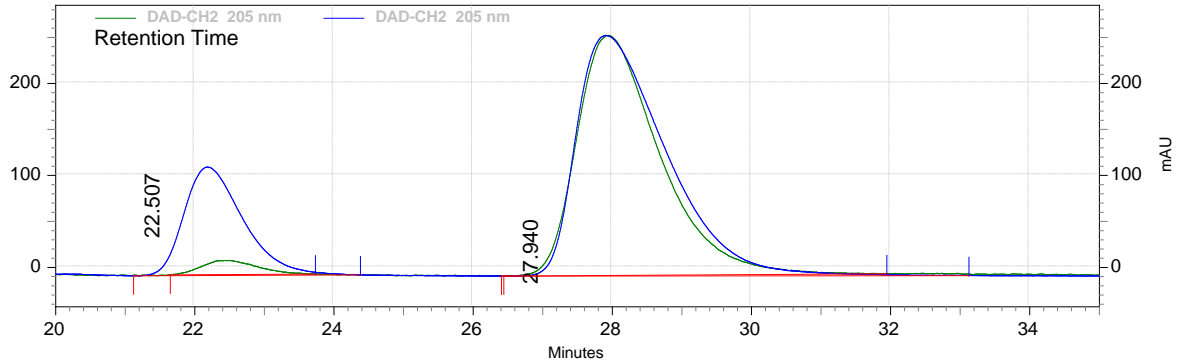

**DAD-CH2 205 nm Results**

| Retention Time | Area     | Area % | Height  | Height % |
|----------------|----------|--------|---------|----------|
| 22.507         | 3389678  | 3.77   | 61198   | 5.54     |
| 27.940         | 86516469 | 96.23  | 1044197 | 94.46    |
| Totals         | 89906147 | 100.00 | 1105395 | 100.00   |

6f

Area % Report

Data File: 5e-PR-C:\Documents and Settings\Yu lab hplc\Desktop\lingchu-kinetic resolution\CL08027-pr-ee-10%-0.5mL-40min-OJ  
Method: C:\EZChrom Elite\Enterprise\Projects\Default\Method\A 120 min without fc 0.5 ml per min.met  
Acquired: 11/15/2013 11:23:38 AM  
Printed: 1/10/2014 2:37:26 PM

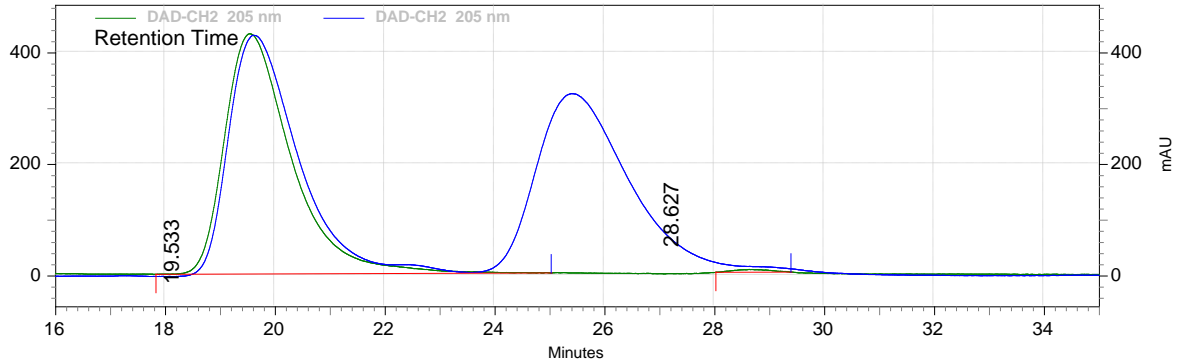

DAD-CH2 205 nm Results

| Retention Time | Area      | Area % | Height  | Height % |
|----------------|-----------|--------|---------|----------|
| 19.533         | 145655911 | 99.37  | 1723908 | 98.87    |
| 28.627         | 923417    | 0.63   | 19697   | 1.13     |
| Totals         | 146579328 | 100.00 | 1743605 | 100.00   |

**5g**  
**Area % Report**

Data File: C:\EZChrom  
 Elite\Enterprise\Projects\Default\Data\LingChu\CL09066-2-SM-ee-10%-0.5mL-75min-OJ  
 Method: C:\EZChrom Elite\Enterprise\Projects\Default\Method\A 60 min without fc 0.4 ml per min.met  
 Acquired: 4/2/2014 1:38:43 PM  
 Printed: 4/4/2014 9:22:34 PM

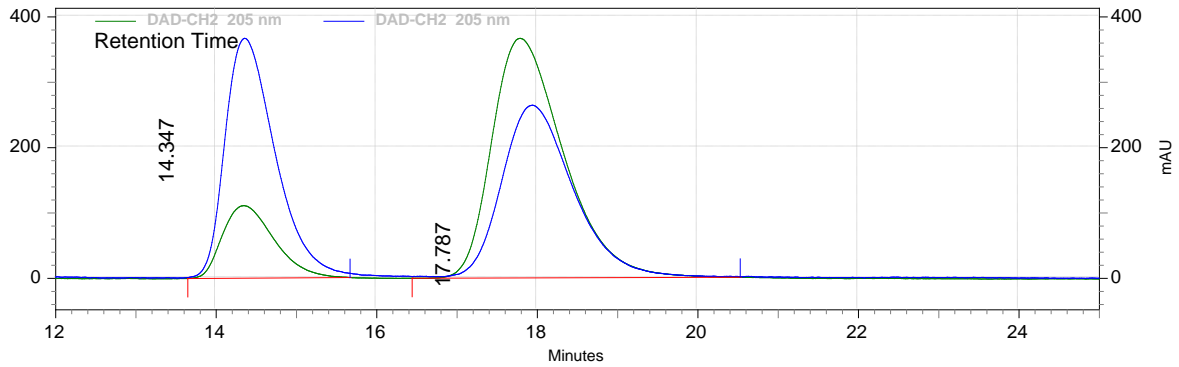

**DAD-CH2 205**  
**nm Results**

| Retention Time | Area             | Area %        | Height         | Height %      |
|----------------|------------------|---------------|----------------|---------------|
| 14.347         | 19794564         | 17.88         | 443985         | 23.24         |
| 17.787         | 90889220         | 82.12         | 1466167        | 76.76         |
| <b>Totals</b>  | <b>110683784</b> | <b>100.00</b> | <b>1910152</b> | <b>100.00</b> |

**6g**  
**Area % Report**

Data File: C:\EZChrom  
 Elite\Enterprise\Projects\Default\Data\LingChu\CL09066-1-PR-ee-10%-0.2mL-75min-OJ  
 Method: C:\EZChrom Elite\Enterprise\Projects\Default\Method\A 60 min without fc 0.4 ml per min.met  
 Acquired: 4/2/2014 3:06:55 PM  
 Printed: 4/4/2014 9:20:20 PM

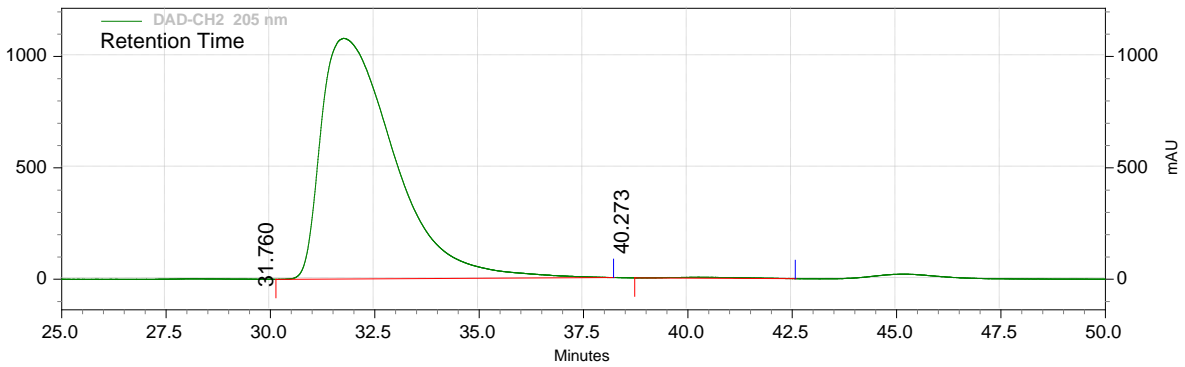

**DAD-CH2 205 nm Results**

| Retention Time | Area             | Area %        | Height         | Height %      |
|----------------|------------------|---------------|----------------|---------------|
| 31.760         | 525971055        | 99.66         | 4319443        | 99.64         |
| 40.273         | 1776529          | 0.34          | 15579          | 0.36          |
| <b>Totals</b>  | <b>527747584</b> | <b>100.00</b> | <b>4335022</b> | <b>100.00</b> |

**8a**  
**Area % Report**

Data File: 5g-SM-C:\Documents and Settings\Yu lab hplc\Desktop\lingchu-kinetic  
 resolution\CL08032-sm-ee-5%-0.1mL-60min-ADH  
 Method: C:\EZChrom Elite\Enterprise\Projects\Default\Method\A 120 min without fc 0.5 ml per min.met  
 Acquired: 11/16/2013 6:20:03 PM  
 Printed: 1/10/2014 2:46:55 PM

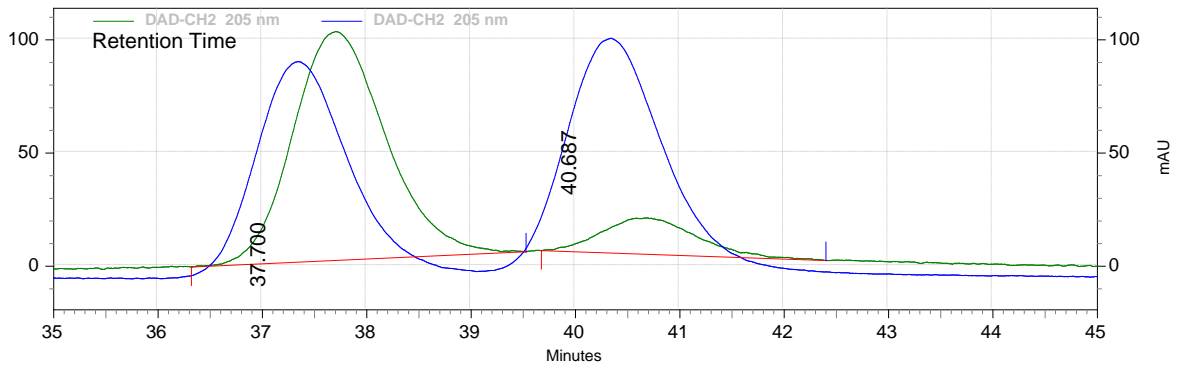

**DAD-CH2 205  
 nm Results**

| Retention Time | Area            | Area %        | Height        | Height %      |
|----------------|-----------------|---------------|---------------|---------------|
| 37.700         | 25074572        | 85.99         | 404499        | 86.26         |
| 40.687         | 4086691         | 14.01         | 64419         | 13.74         |
| <b>Totals</b>  | <b>29161263</b> | <b>100.00</b> | <b>468918</b> | <b>100.00</b> |

**9a-mono**  
**Area % Report**

Data File: 5g-mono-C:\Documents and Settings\Yu lab hplc\Desktop\lingchu-kinetic  
 resolution\CL08032-mono-ee-5%-0.1mL-60min-ADH  
 Method: C:\EZChrom Elite\Enterprise\Projects\Default\Method\A 120 min without fc 0.5 ml per min.met  
 Acquired: 11/16/2013 3:15:12 PM  
 Printed: 1/10/2014 2:49:37 PM

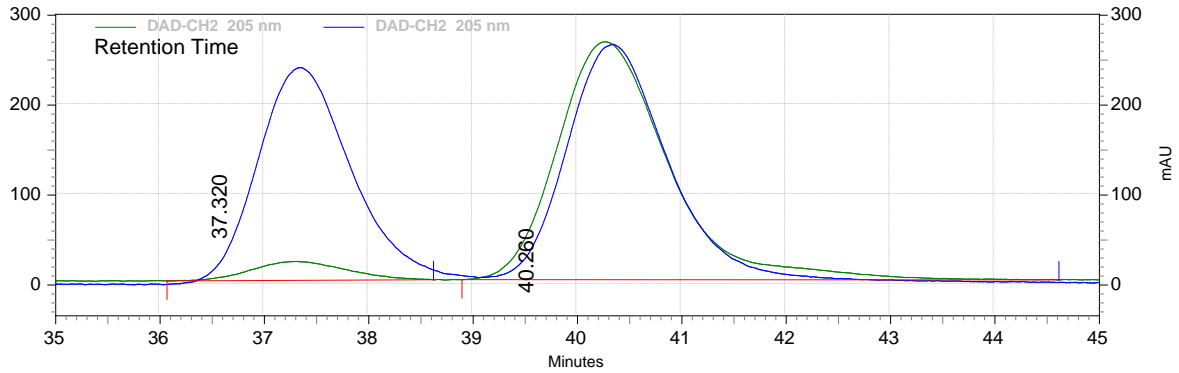

**DAD-CH2 205**  
**nm Results**

| Retention Time | Area            | Area %        | Height         | Height %      |
|----------------|-----------------|---------------|----------------|---------------|
| 37.320         | 5302078         | 6.34          | 83864          | 7.34          |
| 40.260         | 78360330        | 93.66         | 1058741        | 92.66         |
| <b>Totals</b>  | <b>83662408</b> | <b>100.00</b> | <b>1142605</b> | <b>100.00</b> |

**9a-di**  
**Area % Report**

Data File: 5g-di-C:\Documents and Settings\Yu lab hplc\Desktop\lingchu-kinetic  
 resolution\CL08032-di-ee-5%-0.1mL-60min-ADH  
 Method: C:\EZChrom Elite\Enterprise\Projects\Default\Method\A 120 min without fc 0.5 ml per min.met  
 Acquired: 11/16/2013 5:18:26 PM  
 Printed: 1/10/2014 2:52:28 PM

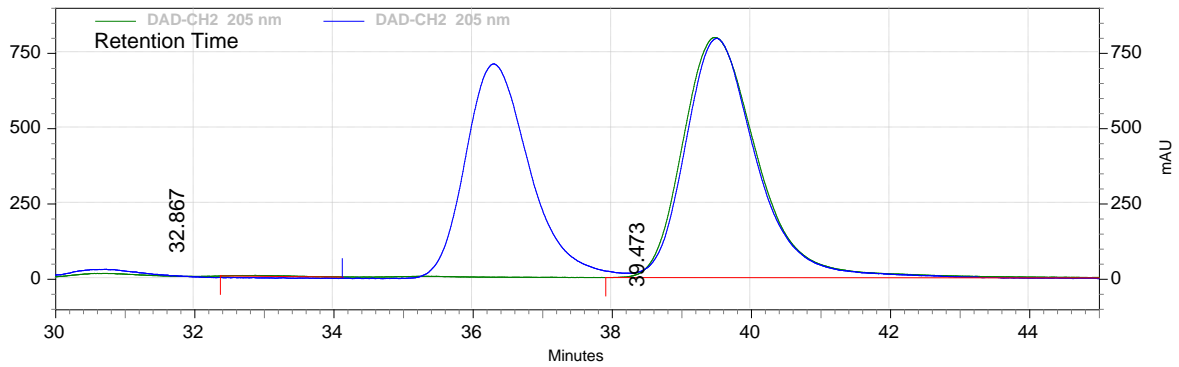

**DAD-CH2 205**  
**nm Results**

| Retention Time | Area             | Area %        | Height         | Height %      |
|----------------|------------------|---------------|----------------|---------------|
| 32.867         | 608676           | 0.25          | 11685          | 0.36          |
| 39.473         | 238492352        | 99.75         | 3190222        | 99.64         |
| <b>Totals</b>  | <b>239101028</b> | <b>100.00</b> | <b>3201907</b> | <b>100.00</b> |

**8b**

**Area % Report**

Data File: 5h-SM-C:\Documents and Settings\Yu lab hplc\Desktop\lingchu-kinetic resolution\CL07119-3-sm-ee-10%-0.3mL-40min-ASH  
Method: C:\EZChrom Elite\Enterprise\Projects\Default\Method\A 120 min without fc 0.5 ml per min.met  
Acquired: 10/18/2013 2:50:24 PM  
Printed: 1/10/2014 2:54:38 PM

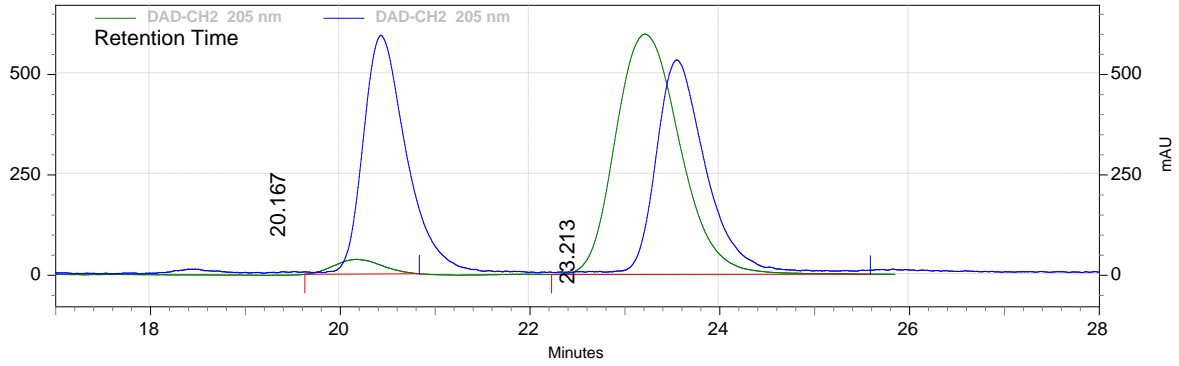

**DAD-CH2 205 nm Results**

| Retention Time | Area      | Area % | Height  | Height % |
|----------------|-----------|--------|---------|----------|
| 20.167         | 5106688   | 4.33   | 146380  | 5.76     |
| 23.213         | 112728212 | 95.67  | 2393278 | 94.24    |
| Totals         | 117834900 | 100.00 | 2539658 | 100.00   |



**9b**

**Area % Report**

Data File: 5h-PR-C:\Documents and Settings\Yu lab hplc\Desktop\lingchu-kinetic resolution\CL07119-pr-ee-10%-0.3mL-40min-ASH  
 Method: C:\EZChrom Elite\Enterprise\Projects\Default\Method\A 120 min without fc 0.5 ml per min.met  
 Acquired: 11/18/2013 11:40:42 PM  
 Printed: 1/10/2014 2:56:43 PM

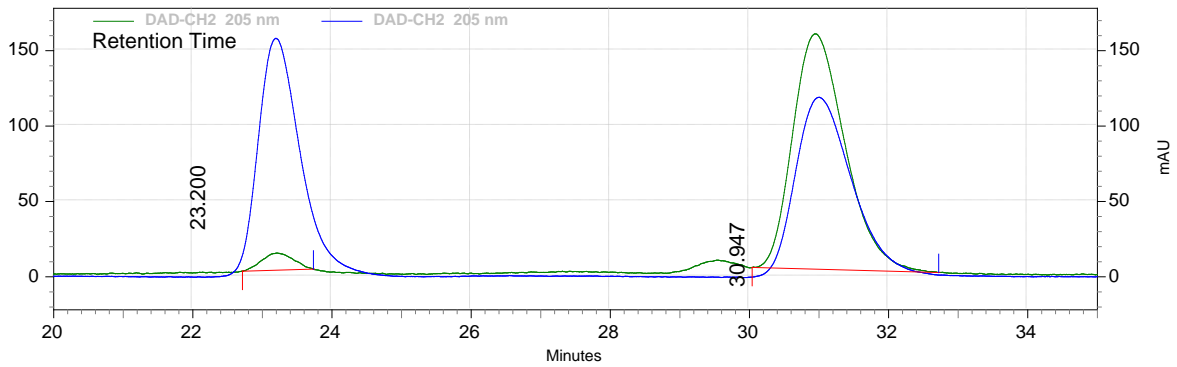

**DAD-CH2 205 nm Results**

| Retention Time | Area            | Area %        | Height        | Height %      |
|----------------|-----------------|---------------|---------------|---------------|
| 23.200         | 1435500         | 4.21          | 45548         | 6.80          |
| 30.947         | 32677521        | 95.79         | 624377        | 93.20         |
| <b>Totals</b>  | <b>34113021</b> | <b>100.00</b> | <b>669925</b> | <b>100.00</b> |

8c

Area % Report

Data File: 5i-SM-C:\EZChrom  
Elite\Enterprise\Projects\Default\Data\LingChu\CL08079-SM-ee-re-10%-0.2mL-45min-ASH  
Method: C:\EZChrom Elite\Enterprise\Projects\Default\Method\A 120 min without fc 0.5 ml per min.met  
Acquired: 1/12/2014 10:28:40 PM  
Printed: 1/14/2014 10:09:32 AM

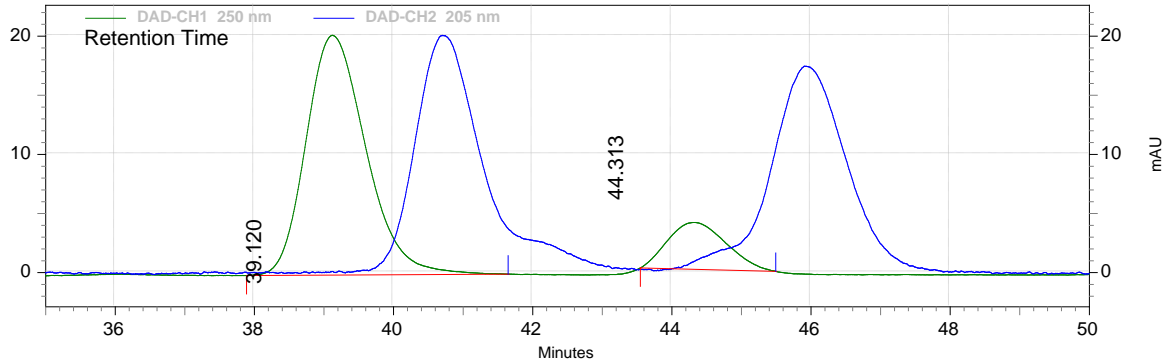

**DAD-CH1 250 nm Results**

| Retention Time | Area    | Area % | Height | Height % |
|----------------|---------|--------|--------|----------|
| 39.120         | 4841826 | 83.98  | 81094  | 83.65    |
| 44.313         | 923718  | 16.02  | 15851  | 16.35    |
| Totals         | 5765544 | 100.00 | 96945  | 100.00   |

9c

Area % Report

Data File: 5i-PR-C:\EZChrom  
Elite\Enterprise\Projects\Default\Data\LingChu\CL08079-PR-ee-5%-0.3mL-60min-ASH  
Method: C:\EZChrom Elite\Enterprise\Projects\Default\Method\A 120 min without fc 0.5 ml per min.met  
Acquired: 1/6/2014 1:19:09 PM  
Printed: 1/14/2014 10:16:46 AM

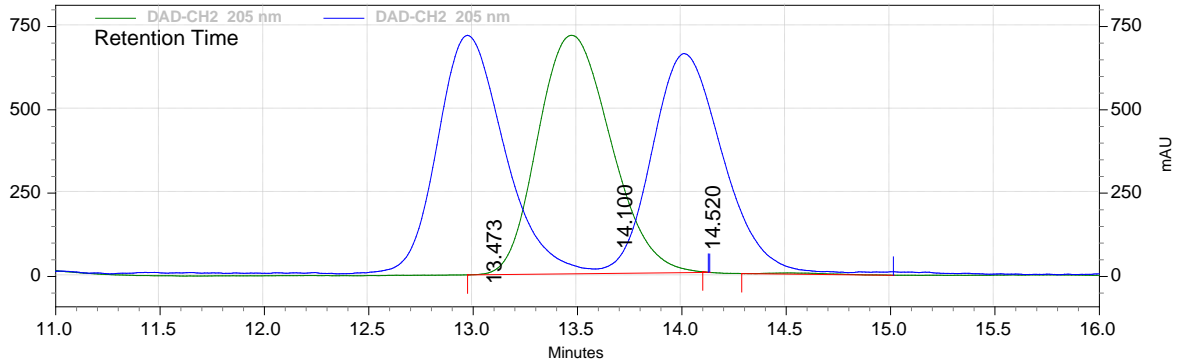

DAD-CH2 205 nm Results

| Retention Time | Area     | Area % | Height  | Height % |
|----------------|----------|--------|---------|----------|
| 13.473         | 69496817 | 99.62  | 2861660 | 99.54    |
| 14.520         | 266465   | 0.38   | 13167   | 0.46     |
| Totals         | 69763476 | 100.00 | 2874827 | 100.00   |

8d

Area % Report

Data File: 5j-SM-C:\EZChrom  
Elite\Enterprise\Projects\Default\Data\LingChu\CL08077-SM-ee-5%-0.2mL-45min-ASH  
Method: C:\EZChrom Elite\Enterprise\Projects\Default\Method\A 120 min without fc 0.5 ml per min.met  
Acquired: 1/13/2014 10:07:05 AM  
Printed: 1/14/2014 10:19:31 AM

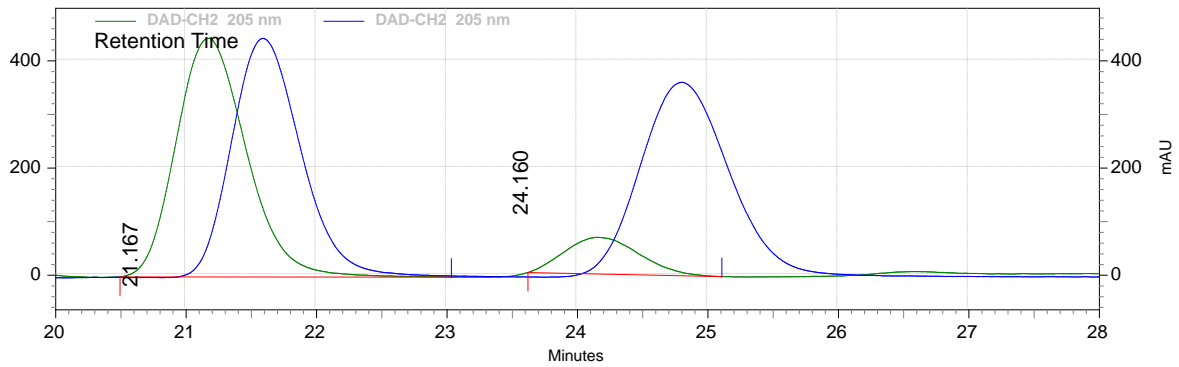

DAD-CH2 205 nm Results

| Retention Time | Area     | Area % | Height  | Height % |
|----------------|----------|--------|---------|----------|
| 21.167         | 66528912 | 85.95  | 1780549 | 86.69    |
| 24.160         | 10879612 | 14.05  | 273294  | 13.31    |
| Totals         | 77408524 | 100.00 | 2053843 | 100.00   |

9d

Area % Report

Data File: 5j-PR-C:\EZChrom  
Elite\Enterprise\Projects\Default\Data\LingChu\CL08077-PR-ee-5%-0.1mL-90min-ASH  
Method: C:\EZChrom Elite\Enterprise\Projects\Default\Method\A 120 min without fc 0.5 ml per min.met  
Acquired: 1/13/2014 12:47:39 PM  
Printed: 1/14/2014 10:22:56 AM

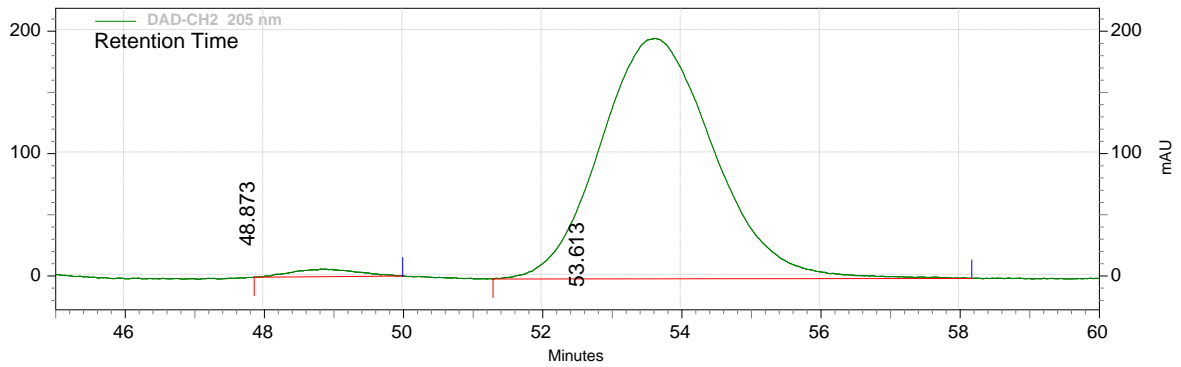

**DAD-CH2 205  
nm Results**

| Retention Time | Area     | Area % | Height | Height % |
|----------------|----------|--------|--------|----------|
| 48.873         | 1635782  | 1.81   | 24985  | 3.08     |
| 53.613         | 88890110 | 98.19  | 785945 | 96.92    |
| Totals         | 90525892 | 100.00 | 810930 | 100.00   |

### X-ray crystallographic data for **3l**

The single crystal X-ray diffraction studies were carried out on a Bruker Kappa APEX CCD diffractometer equipped with Mo  $K_{\alpha}$  radiation ( $\lambda = 0.71073 \text{ \AA}$ ). A  $0.217 \times 0.153 \times 0.055 \text{ mm}$  colorless block was mounted on a Cryoloop with Paratone oil. Data were collected in a nitrogen gas stream at  $100(2) \text{ K}$  using  $\phi$  and  $\omega$  scans. Crystal-to-detector distance was  $40 \text{ mm}$  and exposure time was  $5 \text{ seconds}$  per frame using a scan width of  $2.0^{\circ}$ . Data collection was  $99.6\%$  complete to  $25.00^{\circ}$  in  $\theta$ . A total of  $8740$  reflections were collected covering the indices,  $-11 \leq h \leq 11$ ,  $-9 \leq k \leq 9$ ,  $-13 \leq l \leq 13$ .  $2957$  reflections were found to be symmetry independent, with a  $R_{\text{int}}$  of  $0.0307$ . Indexing and unit cell refinement indicated a primitive, monoclinic lattice. The space group was found to be  $P2_1$ . The data were integrated using the Bruker SAINT software program and scaled using the SADABS software program. Solution by direct methods (SHELXM) produced a complete phasing model consistent with the proposed structure.

All nonhydrogen atoms were refined anisotropically by full-matrix least-squares (SHELXL-2014). All hydrogen atoms were placed using a riding model. Their positions were constrained relative to their parent atom using the appropriate HFIX command in SHELXL-2014. Crystallographic data are summarized in Table S2.

**Figure S1.** X-ray Crystallographic Data of **3l**

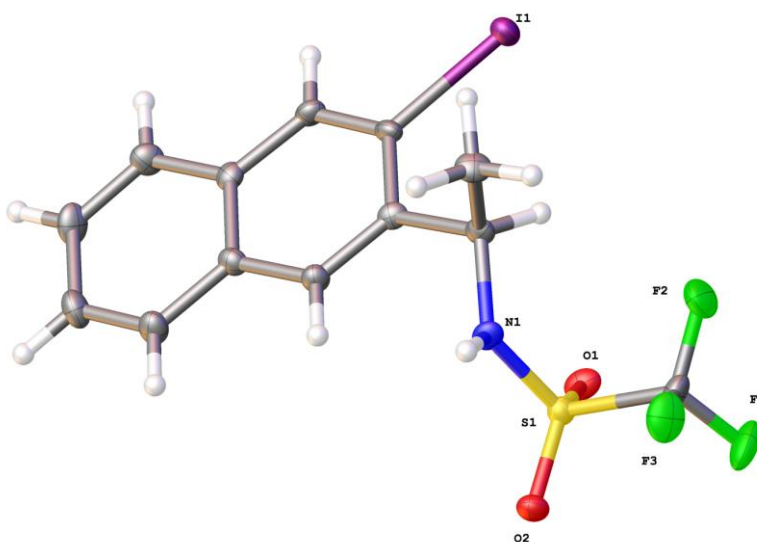

**Table S2.** Crystal data and structure refinement for **3I**

|                                   |                                                                                                                                |
|-----------------------------------|--------------------------------------------------------------------------------------------------------------------------------|
| Report date                       | 2014-03-27                                                                                                                     |
| Identification code               | Yu34                                                                                                                           |
| Empirical formula                 | C13 H11 F3 I N O2 S                                                                                                            |
| Molecular formula                 | C13 H11 F3 I N O2 S                                                                                                            |
| Formula weight                    | 429.19                                                                                                                         |
| Temperature                       | 100 K                                                                                                                          |
| Wavelength                        | 0.71073 Å                                                                                                                      |
| Crystal system                    | Monoclinic                                                                                                                     |
| Space group                       | P 1 21 1                                                                                                                       |
| Unit cell dimensions              | a = 9.653(2) Å $\alpha = 90^\circ$ .<br>b = 7.5500(16) Å $\beta = 106.626(6)^\circ$ .<br>c = 10.651(2) Å $\gamma = 90^\circ$ . |
| Volume                            | 743.7(3) Å <sup>3</sup>                                                                                                        |
| Z                                 | 2                                                                                                                              |
| Density (calculated)              | 1.916 Mg/m <sup>3</sup>                                                                                                        |
| Absorption coefficient            | 2.328 mm <sup>-1</sup>                                                                                                         |
| F(000)                            | 416                                                                                                                            |
| Crystal size                      | 0.217 x 0.153 x 0.055 mm <sup>3</sup>                                                                                          |
| Crystal color, habit              | Colorless Block                                                                                                                |
| Theta range for data collection   | 3.357 to 26.358°.                                                                                                              |
| Index ranges                      | -11<=h<=11, -9<=k<=9, -13<=l<=13                                                                                               |
| Reflections collected             | 8740                                                                                                                           |
| Independent reflections           | 2957 [R(int) = 0.0307]                                                                                                         |
| Completeness to theta = 25.000°   | 99.6 %                                                                                                                         |
| Absorption correction             | Semi-empirical from equivalents                                                                                                |
| Max. and min. transmission        | 0.0932 and 0.0585                                                                                                              |
| Refinement method                 | Full-matrix least-squares on F <sup>2</sup>                                                                                    |
| Data / restraints / parameters    | 2957 / 2 / 195                                                                                                                 |
| Goodness-of-fit on F <sup>2</sup> | 1.043                                                                                                                          |
| Final R indices [I>2sigma(I)]     | R1 = 0.0235, wR2 = 0.0449                                                                                                      |
| R indices (all data)              | R1 = 0.0254, wR2 = 0.0460                                                                                                      |
| Absolute structure parameter      | 0.007(13)                                                                                                                      |
| Extinction coefficient            | n/a                                                                                                                            |
| Largest diff. peak and hole       | 0.662 and -0.445 e.Å <sup>-3</sup>                                                                                             |

## References:

1. R. Giri, B.-F. Shi, K. M. Engle, N. Maugel, J.-Q. Yu, Transition metal-catalyzed C–H activation reactions: diastereoselectivity and enantioselectivity. *Chem. Soc. Rev.* **38**, 3242–3272 (2009).
2. M. P. Doyle, R. Duffy, M. Ratnikov, L. Zhou, Catalytic carbene insertion into C–H bonds. *Chem. Rev.* **110**, 704–724 (2010).
3. R. P. Reddy, H. M. L. Davies, Dirhodium tetracarboxylates derived from adamantylglycine as chiral catalyst for enantioselective C–H aminations. *Org. Lett.* **8**, 5013–5016 (2006).
4. C. Liang, F. Robert-Peillard, C. Fruit, P. Muller, R. H. Dodd, P. Dauban, Efficient diastereoselective intermolecular rhodium-catalyzed C–H amination. *Angew. Chem. Int. Ed.* **45**, 4641–4644 (2006).
5. D. N. Zalatan, J. Du Bois, A chiral rhodium carboxamidate catalyst for enantioselective C–H amination. *J. Am. Chem. Soc.* **130**, 9220–9221 (2008).
6. E. Milczek, N. Boudet, S. Blakey, Enantioselective C–H amination using cationic ruthenium (II)–pybox catalysts. *Angew. Chem. Int. Ed.* **47**, 6825–6828 (2008).
7. T. K. Hyster, L. Knorr, T. R. Ward, T. Rovis, Biotinylated Rh(III) complex in engineered streptavidin for accelerated asymmetric C–H activation. *Science* **338**, 500–503 (2012).
8. B. Ye, N. Cramer, Chiral cyclopentadienyl ligand as stereocontrolling element in asymmetric C–H functionalization. *Science* **338**, 504–506 (2012).
9. F. Kakiuchi, P. L. Gendre, A. Yamada, H. Ohtaki, S. Murai, Atropselective alkylation of biaryl compounds by means of transition metal-catalyzed C–H/olefin coupling. *Tetrahedron: Asymmetry* **11**, 2647–2651 (2000).



10. B.-F. Shi, N. Mangel, Y.-H. Zhang, J.-Q. Yu, Pd<sup>II</sup>-catalyzed enantioselective activation of C(sp<sup>2</sup>)-H and C(sp<sup>3</sup>)-H bonds using monoprotected amino acids as chiral ligands. *Angew. Chem. Int. Ed.* **47**, 4882–4886 (2008).
11. L. Chu, X.-C. Wang, C. E. Moore, A. L. Rheingold, J.-Q. Yu, Pd-catalyzed enantioselective C–H iodination: asymmetric synthesis of chiral diarylmethylamines. *J. Am. Chem. Soc.* **135**, 16344–16347 (2013).
12. M. Nakanishi, D. Katayev, C. Besnard, E. P. Kündig, Fused indolines by palladium-catalyzed asymmetric C–C coupling involving an unactivated methylene group. *Angew. Chem. Int. Ed.* **50**, 7438–7441 (2011).
13. S. Anas, A. Cordi, H. B. Kagan, Enantioselective synthesis of 2-methyl indolines by palladium catalyzed asymmetric C(sp<sup>3</sup>)-H activation/cyclisation. *Chem. Comm.* **47**, 11483–11485 (2011).
14. T. Saget, S. Lemouzy, N. Cramer, Chiral monodentate phosphines and bulky carboxylic acids: cooperative effects in palladium-catalyzed enantioselective C(sp<sup>3</sup>)-H functionalization. *Angew. Chem. Int. Ed.* **51**, 2238–2242 (2012).
15. D. Katayev, M. Nakanishi, T. Bürgi, E. P. Kündig, Asymmetric C(sp<sup>3</sup>)-H/C(Ar) coupling reactions. Highly enantio-enriched indolines via regiodivergent reaction of a racemic mixture. *Chem. Sci.* **3**, 1422–1425 (2012).
16. F. Schmidt, R. T. Stemmler, J. Rudolph, C. Bolm, Catalytic asymmetric approaches towards enantiomerically enriched diarylmethanols and diarylmethylamines. *Chem. Soc. Rev.* **35**, 454–470 (2006).
17. M. T. Robak, M. A. Herbage, J. A. Ellman, Synthesis and application of *tert*-butanesulfinamide. *Chem. Rev.* **110**, 3600–3740 (2010).

18. J. Paetzold, J. E. Bäckvall, Chemoenzymatic dynamic resolution of primary amines. *J. Am. Chem. Soc.* **127**, 17620–17621 (2005).
19. M. Breuer, K. Ditrich, T. Habicher, B. Hauer, M. Keßeler, R. Stürmer, T. Zelinski, Industrial methods for the production of optically active intermediates. *Angew. Chem. Int. Ed.* **43**, 788–824 (2004).
20. S. Arai, S. Bellemin-Laponnaz, G. C. Fu, Kinetic resolution of amines by a nonenzymatic acylation catalyst. *Angew. Chem. Int. Ed.* **40**, 234–236 (2001).
21. C. K. De, E. G. Klauber, D. Seidel, Merging nucleophilic and hydrogen bonding catalysis: an anion binding approach to the kinetic resolution of amines. *J. Am. Chem. Soc.* **131**, 17060–17061 (2009).
22. B. S. Fowler, P. J. Mikochik, S. J. Miller, Peptide-catalyzed kinetic resolution of formamides and thioformamides as an entry to nonracemic amines. *J. Am. Chem. Soc.* **132**, 2870–2871 (2011).
23. D. -W. Gao, Q. Gu, S. -L. You, Pd(II)-catalyzed intermolecular direct C–H bond Iodination: an efficient approach toward the synthesis of axially chiral compounds via kinetic resolution. *ACS Catal.* **4**, 2741–2745 (2014).
24. D. R. Jensen, J. S. Pugsley, M. S. Sigman, Palladium-catalyzed enantioselective oxidations of alcohols using molecular oxygen. *J. Am. Chem. Soc.* **123**, 7475–7476 (2001).
25. E. M. Ferreira, B. M. Stoltz, The palladium-catalyzed oxidative kinetic resolution of secondary alcohols with molecular oxygen. *J. Am. Chem. Soc.* **123**, 7725–7726 (2001).
26. M. Tokunaga, J. F. Larrow, F. Kakiuchi, E. N. Jacobsen, Asymmetric catalysis with water: efficient kinetic resolution of terminal epoxides by means of catalytic hydrolysis. *Science* **277**, 936–938 (1997).

27. J. Song, Y. Wang, L. Deng, The mannich reaction of malonates with simple imines catalyzed by bifunctional cinchona alkaloids: enantioselective synthesis of  $\beta$ -amino acids. *J. Am. Chem. Soc.* **128**, 6048–6049 (2006).
28. A. Berkessel, F. Cleemann, S. Mukherjee, Kinetic resolution of oxazinones: an organocatalytic approach to enantiomerically pure  $\beta$ -amino acids. *Angew. Chem. Int. Ed.* **44**, 7466–7469 (2005).
29. V. D. Bumbu, V. B. Birman, Kinetic resolution of *N*-acyl- $\beta$ -lactams via benzotetramisole-catalyzed enantioselective alcoholysis. *J. Am. Chem. Soc.* **133**, 13902–13905 (2011).
30. S. Zhou, J. Wang, X. Chen, J. L. Acena, V. A. Soloshonok, H. Liu, Chemical kinetic resolution of unprotected  $\beta$ -substituted- $\beta$ -amino acids using recyclable chiral ligands. *Angew. Chem. Int. Ed.* **53**, 7883–7886 (2014).
31. Y. Zhang, Z. Lu, A. Desai, W. D. Wulff, Mapping the active site in a chemzyme: diversity in the *N*-substituent in the catalytic asymmetric aziridination of imines. *Org. Lett.* **10**, 5429–5432 (2008).
32. K. S. L., Chan, M. Wasa, L. Chu, B. N., Laforteza, M. Miura, J.-Q. Yu, Ligand-enabled cross-coupling of C(sp<sup>3</sup>)-H bonds with arylboron reagents via Pd(II)/Pd(0) catalysis. *Nature Chem.* **6**, 146–150 (2014).
33. K. L. Billingsley, K. W., Anderson, S. L. Buchwald, A highly active catalyst for Suzuki–Miyaura cross-coupling reactions of heteroaryl compounds. *Angew. Chem. Int. Ed.* **45**, 3484–3488 (2006).
34. T.-S. Mei, D.-H. Wang, J.-Q. Yu, Expedient drug synthesis and diversification via *ortho*-C–H iodination using recyclable PdI<sub>2</sub> as the precatalyst. *Org. Lett.* **12**, 3140–3143 (2010).

35. M. Wolter, G. Nordmann, G. E. Job, S. L. Buchwald, Copper-catalyzed coupling of aryl iodides with aliphatic alcohols. *Org. Lett.* **4**, 973–976 (2002).
